# Supplementary material for: nanoCAGE reveals 5′ UTR features that define specific modes of translation of functionally related MTOR-sensitive mRNAs
Source: HighWire-hosted journal article supplement (doi:10.1101/gr.197566.115), 2016-03-16
Supplement: Supplemental_Table_S1.xlsx [file Supplemental_Table_S1.xlsx]

## Sheet: cage_gene_MCF7_ALL_allSummary_m
Supplemetal table 1. Summary of nanoCAGE data
The nReads column indicates the number of mapped reads
The wUtrL column indicates the weighted UTR length
The peakUtrL column indicates the UTR length suggested by the majority of the reads
The refSeq 5'UTR column indicates the RefSeq to which the reads map
The UTRseq column indicates the suggested sequence of the refseq in MCF7 cells using the peak approach
Notice: Some genes have alternative 5'UTRs. For these data for all UTRs are shown and separated by ";" in each column.
geneID	geneSymb	nReads	wUtrL	peakUtrL	refSeq 5'UTR	UTRseq
9589	WTAP	193	218.746113989637	196	NM_004906	GGGGCCCGCGGAGCTCGCGCCAGGCTCCTGGGAAAGGACGGGGAGTGTTACCGGGGAGCAGCTGCTCCATTGTGCCTCGAGGCCCCGATCGGGCTAGGCCGACGGCCTCCCTCCCTTCACCTTTCCTCTCCTGGCGGGGTTCGGCGGCGGGCGAGTGACTGCGGCCACGCCTGAAAGGCGACTCTCCTGATTCAAG
79774	GRTP1	152	73.046052631579	63	NM_001286732	CCCGGAGCCGGGAGGCGAACTTGGGACCCGCTGGCCTCGCTCGGTGCGCGCCTCCCTCCCCGC
2810	SFN	1453	71.4927735719202	64	NM_006142	ACAGAGTCCGGCATTGGTCCCAGGCAGCAGTTAGCCCGCCGCCCGCCTGTGTGTCCCCAGAGCC
6651	SON	33074	30.635665477414	31	NM_032195	GAGGAGGAGTTGAGAGAACGGAGCGGACGCC
160	AP2A1	54	100.055555555556	102	NM_014203	TCCTTGGCGCTGCCTGGGGTCCTTTCCGCCCGGTCCCCGCTTGCCAGCCCCCGCTGCTCTGTGCCCTGTCCGGCCAGGCCTGGAGCCGACACCACCGCCATC
10308	ZNF267	568	433.239436619718	435	NM_001265588	GGATTTGGCGGGGGCCTTCGTCGGCTCCAGTTAGAGCTCGGGTCTCCTCGCCACAGCTCCGAGTCTTTCGTTCTGGGAGGCCCAGGCGGCTTCGCGTTCTGAGAATAAACAGAACCTCTGTTGCTCTGCGACTTGCAGGCACTGGGAGATTCGTAGCTAAGACGCCAGGGCATCCCGGAAGCTGGGAAATGGGCCCTGTATAGCCACCCTCTATCCAGTCTTTTCCTGTTCCTGAATTTCAGAACTGTCTGGGATGACTCAAGATGCCCACAGTGGCCATGTCTCCTGGAGTGTTTAGTGACTGTCAGCCCCAGGTCACCTCCTGTTAGAGGACCGCCCAAGGGACTGTTGACATTCAGGGATGTGGCCGTAGAATTCTCTTTGGAGGAGTGGGAACAC…
1967	EIF2B1	808	78.398514851485	74	NM_001414	GGCGCGGCCGGCGGACCCGTTCGAGACAGCGCGGGCGGCTCGGGTCCCCTGGGGCTCCGCAGCAGGAGGACGCC
131965	METTL6	669	240.207772795217	235	NM_001301791	GGCAAAAGAACTCCCGGATAATCCGAATTCGTGGTCCTCAGAATTGGTTTAGGGTTGTTTCGCGGTTCTTCCCGTATTCTGCCTCCGAGGCCCAGTGGGGCTGGCTGTGGGCCCCCTGTGCTGTTTGAGGCGTGAAACTCACCTCAGGAAATGTATCTGATCCATTAGCGTGGATTCATATTATTTGGTGATGGAGAATCTTCAGCTGTGTTAAGTGTTACCGTCAGTTTCAGAG
9994	CASP8AP2	443;443	184.390519187359;223.390519187359	163;202	NM_001137667;NM_012115	GGGTAAGTTGTCGTAGGGGCCCGGTCCGTGAGGGACTGCTAAGGAAGAGGCTGCATGGCGCGGTAGTCCCCCGAGTGGAGGTCGGCTGCCCCTGGGAAACCAGAGAGTCGGAGGGAGTCCATCTGGAGCGGCCAAGTGGTGACTCTCAAAAGGAAATAGGATC;GGGTAAGTTGTCGTAGGGGCCCGGTCCGTGAGGGACTGCTAAGGAAGAGGCTGCATGGCGCGGTAGTCCCCCGAGTGGAGGTCGGCTGCCCCTGGGAAACCAGAGAGTCGGAGGGAGTCCATCTGGAGCGGCCAAGTAGGTCGGGGAAGGGCCGCGCCTGACGTCTGGCCGCAGGTGGTGACTCTCAAAAGGAAATAGGATC
55731	FAM222B	1393;1387;1387	486.611629576454;298.739726027397;133.739726027397	482;293;128	NM_001288638;NM_001288631;NM_001077498	GACTGAGGGGCCGGGCAGTGGAGAAGTGGTGGCGGCGGGCGGCGGGCGGCAAAGGAGCAGCCATGAGGGCCGGGCCCAGTCACCGACCGTGCTGAGGAGTCATGGAAGAGTTTTTAAACCAGGAATATCACAGGAGTGATGCTGTGTTCTTCACTGCATGATTTCAAAAGTGTGAGCCACTGCCCCATGTTGTGTTGATGCCAATCTGCCATGCTAGCCTGTCTACCAGGGCCAGGTGACCTGTCCTTTCAGCTTCTTTCTCACACGCAGATGAACACTGGACTTCAGAAATTGTGAAGGTTCCCCAGCGGAAACACGTTCGTCGTACTGTGAACGGCCTCGACACATCAGCCCAGCGCTACAGCCCCTACCCGACACAGGCTGCCACCAAGGCAGGCC…
347733	TUBB2B	193	109.00518134715	107	NM_178012	AGCCCGTCGGTTCCCGAGCGCCTTCCCGGTGACCCCGCAGTGGGTGTGTGAGGGGAGGACGGACAGACCCAGACGCCGCCGGACCAGGAGGACGCTGACGAGGCACC
605	BCL7A	592	52.788851351351	51	NM_001024808	GAGCAGGACCCGGCGGGCGCGCTCCCCAGCCTCCGTCTCCCCGCCGGAACC
57649	PHF12	90	114.144444444444	14	NM_001290131	CGGGAGGTGGATGA
1854	DUT	402;402	105;122	105;122	NM_001025248;NM_001025249	GACTGCTTCCGAGGTCATGTTCCCAGGACGGGCGCGTCTTCAGGGTGGAAGCCTGGCGCACGTCCGGAGGTGCCGAGGACCCAACCAGCCCAAACTCTGGGGGAA;GACTGCTTCCGAGGTCATGTTCCCAGGACGGGCGCGTCTTCAGGGTGGAAGCCTGGCGCACGTCCGGAGAGACACCCGCCATTTCACCCAGTAAGCGGGCCCGGCCTGCGGAGGTGGGCGGC
5376	PMP22	72;405	146.277777777778;203.503703703704	158;205	NM_153321;NM_001281456	GCCCCCTTGCTTCGCGCGCGCGCAGCCCCGCAGCGCAGCTTTGGCGGCGCCAGCAGCGGAGCCAACGCACCCGAGTTTGTGTTTGAGGCCACCCTGAGGATCGGGACAGCTGTTCCTTTGGGCTGCAGAAACTCCGCTGAGCAGAACTTGCCGCCAGA;TCAGTTACAGGGAGCACCACCAGGGAACATCTCGGGGAGCCTGGTTGGAAGCTGCAGGCTTAGTCTGTCGGCTGCGGGTCTCTGACTGCCCTGTGGGGAGGGTCTTGCCTTAACATCCCTTGCATTTGGCTGCAAAGAAATCTGCTTGGAAGAAGGGGTTACGCTGTTTGGCCGGAAACTCCGCTGAGCAGAACTTGCCGCCAGA
54058	C21orf58	140;140;140	1095.03571428571;1662.03571428571;1083.03571428571	1088;1655;1076	NM_058180;NM_001286476;NM_001286477	GTGTCCACCAGGACAGCGGGCCGGGCTCCCTGCAGGCGCGGGCGGCGCCGAACGGTGCTCAGCAACCACCCGGACAGGGCCAGGCCGTTTTCTCCCGCTCAGGCATTAGTCGTTGGCTGTGGGCCGCCGCGGGAAGTTGAGGCCTACCACGGAGGAGGCTGCTGAGGTGGATCTCAGGGGATCCGCAAGGGCTCCCTCACCCTTGCCGGGACCCTGGGAACCCGAAACAAAATCCTACGCCACCAGCCCGCCGAATGCGCCCCCTCGGCCGGGGGTCCTGGGTCTTCAGAGAAGAACTCGGCCGAATGCGGTCAGAAAGCCCGCGAACCGCCTGGACCTGCAGGCCCCGCCGCTTGGAGCTCCCGCCTTTCCCGACCGAGCCCGTGTCTGCTCGTGTGT…
10010	TANK	1047	120.127029608405	105	NM_001199135	CGGCCAGGCGCCGGCGACCTGAGGGGAGAGGGAACGCAGCTGAAAGCGTGAACTGTACCTGTCATTTACTCCATCCTTTATAGTGATGCTACAGGACGAAGAGGA
6949	TCOF1	6863	36.359318082471	48	NM_001135243	GGACTAAGGCGGGGCGTGCAGGTAGCCGGCCGGCCGGGGGTCGCGGGT
51246	SHISA5	370;387	21.945945945946;510.53488372093	28;518	NM_001272065;NM_001272068	GTCCGTCCGCCCGTCCGCCCGCCCAGCC;GTCCGTCCGCCCGTCCGCCCGCCCAGCCATGACTGCGCCGGTCCCCGCGCCGCGGATCCTGTTGCCGTTGCTGTTGCTGCTGCTGCTAACGCCGCCTCCGGGTGGTGAGCCGGGGGTGGGGGCGGCCCGTCCTGCCCTGGGACCGGGCAGACACTTCCCCGCGCTGCCTCTCCAACGAGCCGGGCAGCACCAGCCCCACTATGCCCCCCACTGACCCCTGATTGCCCCGAGGCCGTCAGCGAACCCCCACGACTGCGGACCCCTCCTCCACCCCAGCACCCTCCTTGCCTGAACAACCCTGCCTAGACACCAGGCAGCTGCCACCTTTGTCTGTCCTGGAACGGTGGGGAGGGGTCTGCCCTCCCGCCCA…
1945	EFNA4	1169	80.4251497005988	82	NM_182690	CTCTTCACTTTGTACCTTTCTCTCCTCGACTGTGAAGCGGGCCGGGACCTGCCAGGCCAGACCAAACCGGACCTCGGGGGCG
401474	SAMD12	80	93.825	64	NM_207506	GCGCGGGGCAGGAGGAGTACCTCGGCCAAGAAAATTATGCATGCGTTAGGGAAGCTCTGAGAGA
818	CAMK2G	228	46.719298245614	55	NM_172170	GACTGTGCACCGACGTCGGCGCGGGCTGCACCGCCGCGTCCGCCCGCCCGCCAGC
54913	RPP25	61	751.639344262295	851	NM_017793	ACGCGCCTCGGGGAACAGCCTGGCCCAAAGCCTCACTCCTCACGTCCCAGGGGTGGACGGGGGTCCGGGAGCCTCGAGCTCCGGGCAGGCGTGGCGAGGCTGAAGTCTGGGTCTTCCGCGCCCCGCGAGGACCACGCCGCGACGTAATCGCCCGCGGGGAGGCGCGGAGTGGAGCCGCAGCCAGCTCCTCCCGCACTCTGCTGACCGCGCACTAGCTGTCCTTGAGGCAAGAATACTTGGGAGCGGAAAAAAGGTGGGGGTGTTCCCCGGGGCGGGGGAGGAGGGGCAAGGCCCCAGCAAGCCTCTTGGAAATCTCTCCCTGGGAGGGGACGAGGGGCGGCCTTCAGTTGCAAATGGGAAGGGCTCGGATACCGGATTTGAAGCAGTGTTTGCACGGCA…
119032	C10orf32	79	29.936708860759	3	NM_001136200	GAA
2330	FMO5	171	359.06432748538	341	NM_001144829	AGAGAAAGTAATTGAGAGTGCTGGCAACAGCAGCTGAAATATAGAGAAGTTGTAGGATTAACTTTTTCGCCCAAAGCAGCTTCAGCCCACGTTTTATTCCCATCGAGGGAGGGAGAATGGGTGCCGCTGAGTGGGCGGGGGAGTGGTCCCTGAAAGGAGGTGGAGTGCTACAGCCCCTCCCCGTTGGCTCTCGCTGTTTGTCCGTTGTTGGTTTATAGTAATTTGACAACAGCCGCCTGTTGAGTCTCCTCCAGATCGCAGCTGAAGGATCTGTTGAGCGCTTCAGGAAAGGCGGTGAGATCCGGACAGGCGACACTAACAGGTGAAGATCTCGGGAGACC
7516	XRCC2	212	77.7358490566038	89	NM_005431	GGGTTTGACTGGCCGTAGAGTCTGCGCAGTTGGTGAATGGCGTTGGTGGCGGGAAAGTTGAGTCTCTCCTGCGCCGAGCCTTCGGGGCG
23464	GCAT	66	12.121212121212	22	NM_001171690	GCGCTCGGGCGAGGTAGGAGCG
56241	SUSD2	384	36.265625	36	NM_019601	GCCACTGCACTGCTGGCTGCAGACACAGGCTGCACC
6322	SCML1	353	442.821529745042	458	NM_001037535	GTCGCGGGAGCTCTCTGATCCACTCAGGGGTCAGGGCATCACTGGTCTCGCGTGCGCGTGACCAGGCCCGGTTTCCGGTGCCAGGACCTTTCCGAAGCGTCGAGTGGCCTAACGGTCACAGCTGTCGCCCATCGGAGAGGCAGGACTACTGCGAGCAGTTTTACCGCGACCTCCGGAGGCCGGCGTGACAGGCTCTGTCACTAAAATAGCAGGAACCGAATATTGTATCTGACGCATCCTGTAATACTGAAGAGCAACTGAAGACAGTTGATGATGTCCTTATTCATTGCCAGGTTATATATGATGCTCTGCAAAACCTGGATAAGAAGATTGATGTGATTCGTAGAAAGGTTTCAAAAATCCAACGTTTCCATGCGAGATCCCTGTGGACAAATCATA…
10713	USP39	194	22.371134020619	23	NM_001256726	GGACGACTCGGCCGGTAGTGGAG
63939	FAM217B	114	271.921052631579	271	NM_022106	CCCGCGCGGGCGCCGGAGAGGAAGGAAGGCTGGCAGCCTCGTCACGTGTCCGCTGCAGTCGCGAAACAGTTCCGGTGGTGAGGAGACCTTTCCAAATATAAGAGGAATAAAGAAGTCACCTCCCCAGCTGTCATCATCTTCCAGCAGATTGAGCAAGAATATTTTGAGCACTACAGGAAAGACAGTCCATCAAACCCGAGATGATGATCAGCCACGTGATTTTTTCAAGAAGAGGAATAGGGTGAATGAATCTCATCAGAAAAGCAGCAAT
64844	MARCH7	166	242.632530120482	222	NM_001282805	GAGGGGCGGGCGCCATTGTGCTTCGCTGCCGACTGCATTTCCTCAGTCACGGGCCTAGAACTCCAAGGAGAAAGGCGGCGGAATTCATGATTTGTTCCTGTAGCTGAAACATACATTGAATGCTTTCTGCCCTGGCATGAACTTACATGGTCAGAGCTGGTTTTTCCTGCCCTCAAATATATTTCTCTGACTCTACCGGTTAGACTAGAAAAATCTTTAAGA
219743	TYSND1	178	89.494382022472	103	NM_173555	AGCTGTGGGTGGCGCTAGGCAGCTTCAGCCGGACCGGGTAGGGGTCCTCGCTCGCTAGCTTGCTGTTTCTCGGAGAAGCTCCCGAGTGTCCGGCCTAGAGGCC
1763	DNA2	761	107.207621550591	107	NM_001080449	GCGCGCGAGGTGCGCAGGCTCGCGCCTTTTTCCCTTTTCTAAGCTTTCTGTGTTACCCCCGGTTCCGCTGTCTTTTCTGTCTACAGTTTGCGATCCCCGCGTCCAGG
5796	PTPRK	3815	329.725557011796	337	NM_001291983	GCCGAGCATGGAGAGCTGCCGCCGCGGCCGGCCGGCGACGCTGGCGACGCTTTCGCCCCTGAGGTAGTTTGGCGACCGCGAAGAAGGAAAAAGGGCGGGCGGGCGGCTGTCCTCTCACCGTCCTCACCCCGCGAGGCCCGGCCCGCTCCTCCGTCGTGGATTTCGCGGCGATCCCCCCGGCAGCTCTTTGCAAAGCTGCTTGAAACTTCTCCCAAACTCGGCATGGATACGACTGCGGCGGCGGCGCTGCCTGCTTTTGTGGCGCTCTTGCTCCTCTCTCCTTGGCCTCTCCTGGGATCGGCCCAAGGCCAGTTCTCCGCAGGTGGCTGTACTTTTG
64763	ZNF574	79	140.050632911392	141	NM_022752	GAGAGCGAGGCTACGGAGCAGGCGAGAGGCGACGGCGAGAGCTAGAGCGGGCGCAGCGTTAGGGTGGCCGTGCAAGGGGAGCCGTGGCCCGGGCCCGGGGCGTGCGAGACGGCGGAAGCAGCCCAGGGCCTTGCTGCCGCC
65260	COA7	3417	19.0611647644132	21	NM_023077	GTCTTTGGGCCGGCGCGAACC
6921	TCEB1	1027	215.213242453749	261	NM_005648	CAGACGGAAGTGAGCGACACACTCTGCGTCCTCGCCTCACCAGGTACGGATCTCCCGCGCGTCGCCGAAAGCGGCTCTGACCCAGCGGAAGTAATTCTTTCGACTGCCCCGGAACCCACCGGAGCAGGCAGCTGGGGGTGGGGGGGCGGCCCTGGGATAGGGGCTGTGGCAGTACGCGGGGACCCGGCTGCGGTGGCTGCGGGACTGACGAGAAACTACTAAAGTTCCTGGGGAAGCAAAGTAGAATTTCATAAGAACAAA
79879	CCDC134	187	136.363636363636	157	NM_024821	GGGACGGAGCTCGGCGGTCTGCGCTCGGTTGCTAGCCGTTTGCTCCCGCTTTCAGTTGCTTTGCTGTTAGCCTGTTGGACCTTCGAGCCTAGCTGCTCGCACAGGACTCGGCCACCTGCCCTTCCTGCACCGACTGGCCAGCTCAAGAGGTTTGGAT
112476	PRRT2	70;111	234.614285714286;182.747747747748	235;142	NM_001256443;NM_001256442	GAGGAGGGGATGAGCACACGGGAGAGGAGAAGAGGGAGACCCGCCGCCTCCCTCCCTCCCTAGCTGACTTGCTCCCTCCCGGGCTGCGGCTGCTGCAAAAGCCAGCAGCGGCAGCGGGAGCTGTCCGGAGGCCGGCGTCGAGGTGAGACCCGGGCAGACTGAGGCTGCGGGGTTTGCCGCTGTCTCTGCTATTCCATCCTCCCCATAGGGGCTCTCTCCCCTCTCCCATCTCAAG;GACTTGCTCCCTCCCGGGCTGCGGCTGCTGCAAAAGCCAGCAGCGGCAGCGGGAGCTGTCCGGAGGCCGGCGTCGAGGGTTTGCCGCTGTCTCTGCTATTCCATCCTCCCCATAGGGGCTCTCTCCCCTCTCCCATCTCAAG
7001	PRDX2	79555	74.912626484822	70	NM_005809	GGCGCTGAGAACGCGGGTCCACGCGTGTGATCGTCCGTGCGTCTAGCCTTTGCCCACGCAGCTTTCAGTC
6829	SUPT5H	11982	235.287013854114	227	NM_003169	TCCGGGCGCCGGGGAGGTGTAGAGAACAGATTCGGAAACTGGGGAGGTCTAGCATGTGGCGTAGGAGGGGGTCCTCACTCCGCTTCGCGATTGCCAAAACGAGCCTGCCGGAAGCGCCCTAAGGGGTTTTCTTCTCCCAGGGAACCAGCGGGGAAACTGAGGCTCGGGGTGGAGCGCAGGATTGTGGGACGCGCCAAGGCTGCTGTCTTTCCCAGCAGCAGCGGAAG
54700	RRN3	3670	38.617983651226	30	NM_018427	GAGGCGCAGCGGTCGCGTTAGTTCGGCCCA
7750	ZMYM2	432;123	196.891203703704;168.447154471545	205;168	NM_001190965;NM_001190964	AGAACCGGGTGAGGCTTATCCCCGCTGTCTTTCCAGTCCAGGGCCGCCGAGAGTGGGGGTGGCTGGGAGCAGCGCAGCCTCCGGAGGAGGAGGCGGAGGCGGAGGCGACTAGGGAGGCGGAGATGGGACCAAGAATCGCCTTCAGCCCTGTCTGGTGCATCCTTGGCAGAAAGTGAGGAGGAAAACACCCCCATTGTTCTTTGGC;CTCCTCACCAGCGCTAAAGCCGGGACTGGACCGAGCGGAGTTGACCAAGAATCGCCTTCAGCCCTGTCTGGTGCATCCTTGGCAGAAAGTGAGGAGGAAAACACCCCCATTGTTAGATGAGGTCTTAATCATGGAACATTTGAAGTCACGTAAAGAAGGTTCTTTGGC
23608	MKRN1	166	72.740963855422	20	NM_001145125	GCTGTGTGGGATAAACAGTA
83543	AIF1L	973	88.783144912641	99	NM_001185095	ACACGCAGCTAGCCGGAGCCCGGACCAGGCGCCTGTGCCTCCTCCTCGTCCCTCGCCGCGTCCGCGAAGCCTGGAGCCGGCGGGAGCCCCGCGCTCGCC
5017	OVOL1	489	279.00408997955	275	NM_004561	AGTCGAGCCGGGAGACGCTTACCTGCCGCTTCCCCGCGCCGCCCGGTGCACCTGGCCGCAAGGGACCTCGTTCTCAGGGAAGACGGCGACATTCCGCGGAGGTGGAACCGCCGCGCGCCGTCCGGGCTCGGACCTTCCCCGGAACGTGGGGGCGCCTTAGCGACTCCTTCCCTGTTGTGCCCCCGTTCCCGGCGTTCAGCCCGGCCCCGCAAAGGTGGGACGGCTCCCGGCTTCAGTTACGGAAGCGGCCCGTGTCCAGCGACGAGGGTTCGAAA
7549	ZNF2	1223	273.542927228128	259	NM_021088	CCATTTTGGATCCTGTTCAGCCACGGGAAGCCGGCGTTTGCACACATTTTCGGACGTCATATTAAAGCGCACCGGACGCCGAGACTTCTGGGAGATGAAGTCCTTGCGAAGGCCCCGCATTGATTGGGAGCGCAGTCGCCAGGACCCTGTGCGCAGGCGCGTTGGTTTCCCGACCTGAAGAGGCGCCGTCTTCCCGGGTCCCGAGCACTCTGTGCCGGAGGACTCTGCCCTTGTCCACAAGGAGAGCACACAGGAGAGA
965	CD58	312	42.099358974359	19	NM_001144822	GAGGCCGGCCCGACGAGCC
9101	USP8	831	314.111913357401	321	NM_001128610	GGGGGTGAGCTGGGCTGGCTTCCGTCCTGGTAGCCAAGGCTAATTCTCCCTCGAGTTCTTGGGAGATGGGCATTTGGCGAGAAGGCTGGCGTTAGTGAAGCGCGCCCGGCGTCACGGTGAGTGCGGGTCTTGGGCCCTAGCACCTGTTCTCTGGGAAGTCGTCCGCTGTGAACGATGAACGCCTTTCCTTCCACCAGCTGCTGGTTACCCCGGAGACAAGCTCTGTCCGCGGAGAGGAGTGGGACAACTCCTAAAGGAAAGAAGCACTTGTAAGGAAATATAGCATCCATTGTGAAAGTGGAAAAGTAAAGATAATTCATC
6050	RNH1	153;428;428;428	107.18954248366;207.039719626168;380.039719626168;448.039719626168	100;194;367;435	NM_203388;NM_203384;NM_203383;NM_002939	CCCGTTCTGCTGGCTCGAGAACGAAGTAGGCCGTCTCGCTCTGGGTCTCCAGGCCCGCGACCGTCCGCCAGTCGTCCCGAGGCCACTCTTCACCTCCACC;GCCCTCTAGTGCCTTAGATTCCAGCGAGCTACGCAAGCAATCCTGGCCCAGCCGAGCTTGCTTCCCCAAATCCCGTAATCCTTGACCTTATTCCCCCAAAGAAGCGGCCTCCCGGGAAGGAGCGCCCTGGCGGAGAAGACTCGAACGGCTCCCACAGCCGGGCGTTGGGGGAAAGGCCACTCTTCACCTCCACC;GCCCTCTAGTGCCTTAGATTCCAGCGAGCTACGCAAGCAATCCTGGCCCAGCCGAGCTTGCTTCCCCAAATCCCGTAATCCTTGACCTTATTCCCCCAAAGAA…
5711	PSMD5	10126	14.946079399565	13	NM_005047	GTCGGGGGGCAAG
6500	SKP1	9891	98.638358103326	96	NM_006930	GCTGTAGTGGCTTCGTCTTCGGTTTTTCTCTTCCTTCGCTAACGCCTCCCGGCTCTCGTCAGCCTCCCGCCGGCCGTCTCCTTAACACCGAACACC
25994	HIGD1A	403	65.697270471464	75	NM_014056	GCGCCTGCAGGGATCGGAAGCCGGTTGGGGTGTGAGAGGTTTTCTCGCTCTAGGGAGATTCTTCAAGCAATCACT
8498	RANBP3	1726	29.267670915411	29	NM_007322	GGCCTTGTGGGAGGGCTTAAGGAAGTAAA
6813	STXBP2	627	38.4066985645933	33	NM_001127396	ACCCGGAAGCGGCGGCGGCGCCCCTCGGGGAAG
28956	LAMTOR2	11629	81.48301659644	108	NM_014017	AGGGCGTCCCGGAGCAGGCCAACGGGACTACGGGAAGCAGCGGGCAGCGGCCCGCGGGAGGCACCTCGGAGATCTGGGTGCAAAAGCCCAGGGTTAGGAACCGTAGGC
27340	UTP20	129	173.271317829457	174	NM_014503	AGGCTCCTCCTTGTCTCCAACATGGCGGCGCCCAGGGGCTCAAGCCGCACGTGAGAAAGTCTGGGCATCTGGGAATCGGAGAGTATAGCCTGTGAGCCGCTTTCCCCTCCTTACTGTCGGTTGCATCCCTTCGACACTCCCGAGGCCGTCGCGGGCCACTGGCCCTCTGCAGCC
473	RERE	193	677.507772020725	835	NM_012102	ATCGCGGAGGTGCCGCTGTTCCCACAGACGCTCGCGAGCAACCCTCCGCGCTCCGGAGCCTCCTCAGCCTCCCGCACACCCCGAGACGCTCGCCCCGCTGGGCCTCGGTCCCCGCCTCCTCCCCCGTCCTTTTCCCCTCTCTCGCTCCCCACATTGTCTCTGCCTCATTTTCTCTCCTAGTTGAGGATTAAAAAAAAAAAAAAATCACCATCATCCTCAGGGAGCCCCCTCGCCCTCGGAAAACAAAACCAGACATGATCCTGGGCTCCTGCTTCTGAAAGATCTGCCCGACCGAGGAGGAGGGAGCCTAGGTTCAAGTCGCAGGAAAGGTCACGGCAGGGAAGCCCCCTCAGCCCCTCCGCGTCGCCTCCCCGCGGGCCGCCCCTCTCGGCCCTGCGC…
9289	ADGRG1	3388;55	228.599763872491;291.854545454545	239;239	NM_001145770;NM_001290144	GGGTGCCTGTGGCCCTGGGAGGAGGTGGAAGGGGAGGAGCAGGCCACACAGGCACAGGCCGGTGAGGGACCTGCCCAGACCTGGAGGGTCTCGCTCTGTCACACAGGCTGGAGTGCAGTGGTGTGATCTTGGCTCATCGTAACCTCCACCTCCCGGGTTCAAGTGATTCTCATGCCTCAGCCTCCCGAGTAGCTGGGATTACAGGTGGTGACTTCCAAGAGTGACTCCGTCGGAGGAAA;GACATGCTGGGAGATTACATCTTCTCTATGGCAAGCGTGACTTCTTGCTGAGTGACAAAGCCTCTAGCCTCCTCTGCTTCCAGCACCAGGAGGAGAGCCTGGCTCAGGGCCCCCCGCTGTTAGCCACTTCTGTCACCTCCTGGTGGAGCCCTCAGAACA…
7249	TSC2	56	6.96428571428601	7	NM_001114382	GTCCACC
1819	DRG2	1748	62.560640732265	48	NM_001388	GCCGGTGCCGCCGCCACCGCTGTCTGTGCGCCCACCTCTGCTGCTACC
4292	MLH1	76;905;76	621;680.971270718232;708	621;693;708	NM_001167619;NM_001258273;NM_001167618	GGAGGCCGCCGGGTTCCCTGACGTGCCAGTCAGGCCTTCTCCTTTTCCGCAGACCGTGTGTTTCTTTACCGCTCTCCCCCGAGACCTTTTAAGGGTTGTTTGGAGTTTTAGATGCAAAATCCACAAGTATTCAAGTGATTGTTAAAGAGGGAGGCCTGAAGTTGATTCAGATCCAAGACAATGGCACCGGGATCAGGAAAGAAGATCTGGATATTGTATGTGAAAGGTTCACTACTAGTAAACTGCAGTCCTTTGAGGATTTAGCCAGTATTTCTACCTATGGCTTTCGAGGTGAGGCTTTGGCCAGCATAAGCCATGTGGCTCATGTTACTATTACAACGAAAACAGCTGATGGAAAGTGTGCATACAGAGCAAGTTACTCAGATGGAAAACTGAAAG…
10239	AP3S2	4309	36.304014852634	31	NM_005829	GCCGGTGCTGAGAGAACCGTGGCTGGCAAAG
25950	RWDD3	163	36.067484662577	32	NM_001199682	GGGGAAGCGCTGAGGCGGTGGGGCCCACAGCC
54455	FBXO42	131	205.259541984733	202	NM_018994	GGCGGCGGCGTTTGAGTGGAGGAAGATGGCGGCTCCGGGCGGCTCGGGGTCCCGCCAGCTGTGAGGAGCCCCGAGCACGGCTGTCGCGGCCTGAGGCAGAGCGCCTCTGCTCTGGCCCTGTCCCTGGCTCCCTCATTACCGTCGCCAGCGGAGCGAACCCGAGAGCGTGGAGCGGGCTGGGCCAGCTGTTGAGTGGAATGTC
91833	WDR20	1493	25.855994641661	27	NM_181308	AGGGCAGGATGAACGCTGCTTTCCAAG
7756	ZNF207	4444	133.446669666967	129	NM_003457	GTCGGCCATTTTGTGTCTGCTTCCTGTGGGACGTGGTGGTAGCCGTTGGGTTGGGAAAGTGAGGGATTTTTGGCCTCGTTTCTCCTGCTTCTTTTCTCCTCCCTTTTACTTTGCCGGTAGAACACAGTT
79178	THTPA	1524;228;1524	420.262467191601;209.324561403509;420.262467191601	326;249;326	NM_001256062;NM_001256321;NM_001256322	GGTGTAGAGAGGGGGGCGTTGAAAGGACACCCGCTACCCGGCCTGCTTTCTAGGGGTCTCTTTGGATTGAGGACATCAGCAGCAGTGGAAGGGATTTTACTGGAGACCTGTCACTGTCAGAGCCTTAAAATATCACCGACGGGGCCTTAATGTCACCGAGGTAGAGAGAAAAGGGCAGTAGCCCTAGAGACTATTGCGACACAGTGTGCCCCTCATAAGTTTTTCCAGGGAGGGGTTCTGTACTGAGTTGACGCCCCAGGAGCTGAGCACCAGGCTTTGCATCCTTGGGAACTCAGCAAACGTTTGTTCAGCCAATTGCAGGTAGC;GGCCACCGCGGGGGTCGCGGCCTCCCATTACATAGCGCGTGTCTCGAGCCCTGGCCTGCTCTCGGCACCGCC…
5356	PLRG1	776	104.886597938144	107	NM_002669	GCCGCCTGGGCGCCCAATTCCGGAAGGTGCTGCACAGCTGTGGCGGCGGGTACTGCGTTAGTGATTAGAGTTTCTTCCCTGCCGGAGGTGGGATACACGGTAGCATC
51673	TPPP3	437	227.283752860412	215	NM_016140	GTCCCACCCGGGAGCCGGCAGGGAGCGGAGCTGCGGAGCCGCCTGGTCTCCCGCGTCCATCGGTCCATTCCTGCGTCGTTCTGTCCTTCCGAACGCACACTTCAGGAGCAGCCGCGAGGAGTGAGCACTGCACGCAGGATCCGCCCAGTGCTTGGGCCAAGCACCCTGTGGCATCCAAGCTCCCCTGGACGTTACCCTTGGTGAACCAAGGTGGC
11018	TMED1	817	46.473684210526	21	NM_006858	GCAGACCAGAGGGTGACCCGG
10135	NAMPT	282	115.875886524823	103	NM_005746	GAGCAGTGACTTAAGCAACGGAGCGCGGTGAAGCTCATTTTTCTCCTTCCTCGCAGCCGCGCCAGGGAGCTCGCGGCGCGCGGCCCCTGTCCTCCGGCCCGAG
54778	RNF111	384	374.559895833333	370	NM_001270528	GCGGCGGCGGCGGCTGTAGGGGAGCAGCGGCAGTGGCGGCGACGGCGAGGAGGTGTTCGGTTTGCGCAGCGTAGAAACGCCCGCAGCTTCAGAGAAGGAGTTCTTGTGGGACCAAATTAGGCATTCTGAACCCACGCCGGCTTAGCTGGGCCGAGTCCAGGCGCTGCCGCACGTACAGTTTTGGTGGCGGTGACAGACACTGTTCTTGACTCTAGGGGCCTATTAGGCCGACGTCTGAGGCGCAGATCGCTGGCTCTCGACGCATTACTCTTTACGCCTTACATTTCTGTCTTCCTTCCTGGGTCAGTGATTCCCGGACCCTGGAAGAGAAGAGGGTGGCTAATGATTAAGGCTTTCCTTAAAGTTTCCC
220074	LRTOMT	709	935.009873060649	583	NM_001145309	GAGGCAGTGGGACGCCAAGACTGGAGAGGAAGCGACTGCGGGGAGTATTTCCATTTTAACCGGAAACAATCCCTGAACCCACAGGAATGAATGCCTAATGGTGGAGTTTCAGCCATCAGTGACAGGCTGAACCCAGACTCCCAGGGCACCTGCTTGCACCTTTGAATGATGGCCTGAACTATGAACAAACGGGACTATATGAACACTTCGGTACAGGAGCCCCCTCTTGACTACTCCTTCAGAAGCATCCACGTCATTCAAGATCTGGTAAATGAGGAGCCAAGGACAGGACTACGACCACTGAAGCGTTCAAAGTCGGGGAAATCACTGACCCAGTCCCTGTGGCTGAATAACAATGTTCTCAATGATCTGAGAGACTTCAACCAGGTGGCTTCACAG…
55769	ZNF83	152;152;116	620.973684210526;553.815789473684;491	706;618;491	NM_001277945;NM_001277949;NM_001277946	CTCGCAAATCTGGAAGCGGATCGCGTGGAGTGACGGTCACACCGCGGCGAATTAATTTCCAAAGACTCATGTTACATGAGAAAGCCACCAAGAAGACCAAAGAAAAGGAGACAAGGATGGCTCTTCCTCAGGGATGCTTGACTTTCAGGGATGTGGCTATAGAATTCTCTTTGGAGGAGTGGAAATGCCTGAACCCTGCACAGAGGGCTTTATACAGGGCCGTGATGTTGGAGAACTACAGGAACCTGGAGTCTGTGGGATTGACTTCTAAGGACTCTTGGTACATGAGGAAGAAACCCGGAAGGGGAAGAGGAAAGCAAAGGCGTCAGGAATGGTTCTTCCTCAGGGTCTATTGACATTCAGGGATGTGGCCATAGAATTCTCTCAGGAGGAGTGGAA…
114883	OSBPL9	223;223;223;99	18.461883408072;18.461883408072;18.461883408072;355.383838383838	19;19;19;354	NM_148908;NM_148909;NM_024586;NM_148905	GTCATTGGCGGCTCCCAAG;GTCATTGGCGGCTCCCAAG;GTCATTGGCGGCTCCCAAG;ACCTCAGTCAGGACCGCCTGCACCGCAGTCCGGGGATCGGGTCGAGGGGAGAAGAAAAAGGGGTGCTCGGGAGCAGCCCCCGGCTACCTCCCCTGGAGGCACAGAGGGCGGGGGCCTTGGCGAATGGCTTTCTTGCTGGCCACTTGCGGAGTGAGTAGACCCCGAGGGTCTGGGAGAGGGGCCGGCCCCTACCCCTGAGTCCCCGGGGTCCCGGCCGCCAGGCCGGAGCGCGAATGTCGTGCTCACCCTGCCTCCTTCCCGCCGCCCCCTGGGCTTTTTGATGACAAGCTTCAAAACTGCAAAGAAGATGAACAGAGAAAGAAAATTGAAACTCTCAAA…
80218	NAA50	2288	244.543706293706	246	NM_025146	GAGAGACCCGAGTGCACGTGTGGAGAAGCGGCGGCACAAGCGCGGCGGCGGGAGACACTCCCGCCCCCACCAGACTCAAGCCCTCACTCGACTCTCGCGGCCTTCGTTGCTCGCACAGCTCCCTGCCCAGGCTAGGAGGCCGGCTTGCGGGGTTGAGTGGCCCGAGCTAAGGGTGCGGAGACCTAAGGGCGGCGACTACGACGGCGTTGATATCGGTGGTAACGACGGCCTCAGCAGGCGGGGAAG
5519	PPP2R1B	186	17.166666666667	11	NM_002716	GGAGAAAGAAC
9403	2015-09-15	372	17.77688172043	24	NM_004261	TAGGCAGCCAGAAACCTGCGGAAA
54758	KLHDC4	3552	90.9912725225225	54	NM_001184854	GAGCGCGGGCCGTTTTCTTTCCTGGTGTCCCGTCGCGGCTTGGGACCCGGCAAG
481	ATP1B1	218	34.995412844037	35	NM_001677	CTCCGGACCGCGGCAGCTGCTGACCCGCCATCGCC
22828	SCAF8	148	474.905405405405	485	NM_014892	ATATTGGATGCCGCAGCCGCTGCTGCCAGCGCTTCCTCCTCTGTCTTCGCCGAGCGGGGCTGGTTCCTGCGGCCCGAGCGGCGGGGAGGTGAAACAGGAGCCCGTCGGAGGAAGGGGCAGAAGGGAGTGGAGAGTGTAGGGGAAGGGGCTAGAGGGAGGGGGACCGAAACGGAGCGGGGCAGAGAAGAGAAGGCGCCGCGGCCCAGCCCCTCCCCCGCCCGCCGCCGACCCGCCCCGGCAGCGCCTCTGTTCCCTAGAACGGCGCTCCCCCCGCCCTAGCGGCCATGCCGGTGCCGCTCTGCCGCTGAGGGAGCCCTTCCCCGCCAGCGCGTGCCCTTCCACTCCGCCCCGAGGTCGCAGCGGCCCGCTCTCCCGCCAGCGCCCCCTCCTCGCGGCCAC…
85013	TMEM128	189	640.761904761905	613	NM_032927	GACGTCACTTCCGTCGCATTTCGGGGCGGTACCAAGATGGACTCCTCGCGGGCCCGGCAGCAGCTCCGGCGGCGATTCCTCCTCCTGCCGGACGCCGAGGCCCAGCTGGACCGCGAGGGTGACGCCGGGCCGGGTGAGGCGCGCACCAAGCCGCCCCGAGGTTCTCAGAGGCGAGGCGTCGGAAAACGGCCGGCCTCCGGCAGCCCTGGCCCAGTCTGGAAGGACTGAGTTTCGGCTTTGCAAGTCGAATATTTAATGTCAGGGAAGATCCTTAGAATCGCGGAGTGCTGTGCATCGTCATTTCAGCTGCGCTTCAGAATTCTCTGGAGAGCTGATTTGACACCTATTTGGAAATAGCGATTAAAATTAAAAATACCCACCAGTTTTAAGTCTTAAGGA…
91663	MYADM	5412;2084	105.371581670362;77.524472168906	141;38	NM_001290188;NM_001290190	CCCTAGAGGGAGGAGCCTGTCCAAACGGACGCTAACGGCCTACCTCCCCCTCAGGTGCTCTTACAGCCTGTTCCAAGTGTGGCTTAATCCGTCTCCACCACCAGATCTTTCTCCGTGGATTCCTCTGCTAAGACCGCTGCC;GATCTTTCTCCGTGGATTCCTCTGCTAAGACCGCTGCC
91894	C11orf52	218	63.371559633028	60	NM_080659	GGAAATGCACAAGCCTCTTGATGCATAAAAACAGCTGGGCTCCCTTGGAGACAGAGCGCC
7918	GPANK1	26968	572.598338771878	586	NM_001199237	GGTGGGGTAGGGAAGTTGCTACTTCCAGGGAACGGCGGCGACCGCTACAGCGCAGGCCGCGGACCCGACCGCGGCAGGCGAAGTGGGGTGGGGGGAGTGGAAATTAGGGAGGGTGGGGAAGAGGGCAACACGCAAGCGCCAAGGGTCAGGTGCCGCGGTGGATGCCGGGACACGGAGTCCCCGGTAGAGAAAGAAACTGGCTAAATGAGAGAAAGCGAACTACCAATCCCAGGATGACCCGCGCACGACCTGGCTGTCACGAAGGCCCGGAGGAGGGCGCTTGCGGGCGGGGCACAACGAGAAGCCACCGGAAGCGGAAGCCAGAATGGCGCCATTTTGCGGTACGGAAGCTACACAGCAACACGTATAGGAGACTCTCCCCGAGATCTTCTAGGGAGT…
23635	SSBP2	1506	17.901726427623	9	NM_001256734	GGCACAAGC
9140	ATG12	3162	39.243833017078	17	NM_004707	GAGTGTCTCCAAGCAAG
23221	RHOBTB2	77	154	154	NM_015178	TGGAGCCCAGCAGCAGCGCGGCGGCGCCGGCGTCGTCCCAACTTGCAGGCGCGGAGGGACCCCTGACATTTCACTAAAATGAGCGTGCTCAGCAGGAAGAGATGTGTTCCTCACGCTAGAAGCCACCCCGTCACATGTAGTGGTGTCCCGTTTA
25850	ZNF345	208	339	339	NM_001242474	GGGGCTTTGTGAGATAGCTAGGGTCGACTTGTGTGGATTCTAGTAGAACGGAGCTGACCCTATCCGAACAGGCCCCTGCCCTGCTTGGATAGAGGCCTCCGAACAGGAGTAAAGAATGGCTGTTGAACATCCACAAGGCACCTGCAAGACCTCTAACTTCACCCTGGAGTTGAGCAGAAACATGGCTTGCCTTTTCCCTCAGATCAGTCTTGGACTCCAGACAAAGGGTTGGAACTTTGAGCCAATAAGCAGGTTACTGGTAACAGTGCCTGAGGAAAGACAAAGCTATGGGTACTATGAATCAAAGTTGAGACCAAGAAATTATTTCTGAAAAAGGAT
90701	SEC11C	694	62.4884726224784	54	NM_033280	AGCCGTCTGTGCCACCCAGAGCCGGCGGGCCGCTAGGTCCCCGGAGACCCTGCT
55217	TMLHE	1700	127.797058823529	127	NM_018196	GGAGCGTGGGGCCGACAGTTTTGGGGGTGAAAAGGCAAAAGGCGGGTGAAAGGCTGCCTCCCGAGACTCTCCTTGCTTGGAATTCTGCCCACTCTGCGGAGTTAGCAGTCACGACCTCCAGCACAGG
56919	DHX33	71	320.408450704225	333	NM_001199699	CGGCCAAGAGATTCCGGCCAGGCTCTGGACCTCCGAGCCGCGCTGGGTCCTTCCCTCCCGGGAGGCAAGTGGTGATGCTGCTGACTGCGGGCAGCGGCGGCAGAGGAGGAGGAGGAGGCCGGAGGCAGCAGCCGCCCCTGGCCCAGCCCTCGGCCAGTCCCTACCCTGAAGCTGTGGAGCTGCAGCGCCGGAGTCTGCCCATCTTCCAAGCGCGGGGGCAACTGTTGGCCCAGCTCCGAAACCTGGACAACGCGGTCCTCATCGGTTGGCTATACAGTGCGCTTTGATGATGTCACCTCAGAAGACACCAGGATCAAGTTTCTGACAGATGGC
282969	FUOM	164	12	12	NM_198472	GTCTGCCGGGCC
55719	FAM178A	103	195.019417475728	142	NM_018121	GAAGAGAGAACCGCCATGAAGAGAGAAGGGGGTGCCGCCCACCTCTGCTCCGACAGCCTCCCGGAGTCCCAGCAGCAAGACGGCAACCACGCACCCAACTTCTCCAGCCACGGCTCATGCCGCCGTCGCCAGCGGCGCCGAC
10535	RNASEH2A	1315	69.0182509505703	90	NM_006397	AGGCGCCGCTTCGAGGCCCGCGGAAAACGCGCGCCGAGACCCGCTCCTGCAGTATTAGTTCTTGCAGCTGGTGGTGGCGGCTGAGGCGGC
6470	SHMT1	385	96.820779220779	107	NM_148918	GGCTGGCCCGCGGCGGTGCGCGGGGCGTTGGGTCAGCGGGTCTGGGACTGGTGGCACCGGCGGCGGCGTAGGACGGAGGCGTCGCTAGGCAGCTTCGAACCAGTGCA
271	AMPD2	174	495.028735632184	535	NM_001257360	GCAGAGCCTGGCGCGGAGCCGGCGAGATTTTGGTGGGGTCTCACCTGTTGCGTGACTCCCCCACAGTCCGGCCGCGGGAGTCCGACCCTGAATGCCCAGGGAGTGTTGAGAGAAATCTGGACGAGTTTCGGGTCCCGCTCCCTTGGGAGCACGTGGCCTACCAGCCTCTCGATTGCAGGGTTGGGTGGTCGCGACACCGGGGTCGCCTTGAGGCCAGTCCGGCTGCCGAGGTCTGCGGGAGTCCACCTCCGGCCAGCTGGCAATTTTGAAAGACTGCCTTACTTTCCCCATCTCAGTGCCAGGGCAGGGGCCCTTGGAGTGACTTGGCTGGGGTCTGTGGCCCGATCCCCCTGCCGTCCCTCAGGACCCGGGCTTTCTGCTGTACAGACTTCTCGTGGG…
64924	SLC30A5	85	234.941176470588	230	NM_001251969	GCTGCTTCCCGGGAACCTGGCGCCGCCGGAACTGATCGCGGCCTAGTCCCGACGCGTGTGTGCTAGTGAGCCGGAGCCGGCGACGGCGGCAGTGGCGGCCCGGCCTGCAGGAGCCCGACGGGGTCTCTGCCATGGGGGAGTGACGCGCCTGCACCCGCTGTTCCGCGGCAGCGGCGAGACATGAGGAGACCCCGCGACAGGGGCAGCGGCGGCGGCTCGTGAGCCCCGGG
64745	METTL17	732	19.058743169399	20	NM_022734	TCCGGTTCGCCTCCGGAGCC
79075	DSCC1	70	14	14	NM_024094	GACCCGGCGCTGCG
22808	MRAS	82	489.756097560976	490	NM_012219	AAGTGTTAGGATTACAGGCGTGAGCCACCGCGCCCGGCTTGAATTGTACACTTCAAAAGGTGGAATTTTATGGTGTTGAATTATATCTTTATTTTTTTAACGGGGGGAAAATGACGCCGCTGGAGAGGAGTTAGCGGAACTGAAACAATGAAATGGTGCGCGAGTGTCGCCTGTCCCCGTCGCATCCATCCCAACGAAGTTTGGGCCCTGGAACGGTGCACCCAGAAGGCCTGCGGGGAGAGACGCTGGGGCATGATCTGGAAGAAAGACGTCTCAGGATTCGAAGGGAATGCAGCTAAGGTGGCGGCGGAGGTTCGCCTAGGACTGGGGAGGCGTCCCTAGGCTCAGAAGTTGGCCCGGCCGGAGCGGAGATTTAAAGGTTGGAGCGCAGAGGCTCTT…
84280	BTBD10	393	153.262086513995	141	NM_001297741	TCCGGAGGGATCTGGCTGAGGAGGAAGTGGAGGTGTCACTGGCCCCGGCCTTTGCCCCAATCTTGTGTGGGCACTGAAGGGGGACTACAGGTTCGAGATACTTCCTCGCGTATTGCTAAAGGAGGAGTTGACCACACCAAA
7499	XG	923	199.513542795233	192	NM_001141920	GTGGAGTTTGGGATCTGAGCTTGGAGCCCATTTGTTTCTGGCAGTTCCGCTCATATTTTCCACTTGAAGACATCGCCTCCCTTCCTTCCAAGCTGGGAGACCAGAAGTCAACAACAGGAGGGTGGAGAGGCCGGGTCTCACAATCCGCTTGGCTGGGGAGTCCACTGAGGTTCTTGCATCCTGAAGCAAACC
55355	HJURP	2519	33.38745533942	30	NM_018410	GGGTTGGCGCTTGGGTACTGGCTGGGTCCG
10328	EMC8	136	238.823529411765	249	NM_006067	GCTTTCCGGCGGCGCCGGGCGAGAAGCGCGACTGGAGTCTGGGGCTGCGGCTTCCCAGAGGCGCGAGTCGCTTTTCCAGGAGCCGAGGCCCAAACGGGGCCGGGCCTGAAGGGTCCCCCGCCAGCCCGCGGCCGCGCCATCAATCGCCGCCGCCTCGTCCCGCTTCTCGGCTGAGGCGCCGCGCGGCCAGGCAGCGGGTCCAGGCCTCAGCCGCGCGCCCAGGGGCCTCCGGGGCCCTCCCGGGTCAGC
57720	GPR107	601	30.371048252912	24	NM_001136557	GCGGCTGGTGATGCTGGAACAAAC
51514	DTL	352	108.022727272727	107	NM_001286230	GGAGGCGATAACGATTTGTGTTGTGAGAGGCGCAAGCTGCGATTTCTGCTGAACTTGGAGGCATTTCTACGACTTTTCTCTCAGCTGAGGCTTTTCCTCCGACCCTG
56137	PCDHA12	62	158.58064516129	150	NM_031864	ACGGAATAGGATCGACTCCATAATGACTGTGATGCTGGAAAAAATTTACTAAATATGTACTTACAGAAAAGGGTGACTGCTCATAAAATACCTCAGGCAAGCGATCCCTTAAAACTGATTGTCCCAACTCAGAGGCCCTCATTTTCTGCA
6189	RPS3A	17228	25.261434873462	26	NM_001267699	GCCCTTTTGGCTCTCTGACCAGCACC
6836	SURF4	950;943;943	284.4;58.932131495228;58.932131495228	287;60;60	NM_001280791;NM_033161;NM_001280789	GCCGACGGGCGAGAGCCAGCGAGCGAGCGAGCGAGCCGAGCCGAGCCTCCCGCCGTCGCCATGGGCCAGAACGACCTGATGGGCACGGCCGAGGACTTCGCCGACCAGCGTCTGTTCCTCACACACCCCGCCCAAGGACGTGCCTGGCAGCGGCCTGGTGCTCCCCGCCGCAGCCACCTCACCCTTGGGTTTCTGTGGCCCTGCAGTTCCTCCGTGTCACAAAGCAGTACCTGCCCCACGTGGCGCGCCTCTGTCTGATCAGCACCTTCCTGGAGGACGGCATCCGT;GCCGACGGGCGAGAGCCAGCGAGCGAGCGAGCGAGCCGAGCCGAGCCTCCCGCCGTCGCC;GCCGACGGGCGAGAGCCAGCGAGCGAGCGAGCGAGCCGAGCCGAGCCTCC…
11152	WDR45	1385701	347.819987140083	348	NM_007075	GGCCGGGCGCGGTGGCTCACGCCTGTAATCCCAGCACTTTGGGAGGCCGAGGCAGGTGGATCACGAGGTCAGGAGATCGAGACCATCCTGGCTAACACAGTGAAACCCCGTCTCTACTAAAAAAATACAAAAAATCAGCCGGGCGTGGTGACGGGCGCCTGTAGTCCCAGCTACTCAGGAGGCTGAGGCAGGAGGATGGCGTGAACCCGGGAGGCGGAGCTTGCAGTGAGCCGAGATCGCGCCAGTGCACTCCAGCCTGGGCGACAGAGCGAAACTACGTCTCAAAAAAAAAAAAAAAGAAAGAAAAGAAATTGTTACATTTTATATATATAGGAACAATCCTGCACC
9128	PRPF4	5542	67.806928906532	69	NM_001244926	GGCGCGCGGTGGACGGTCTGAAAGGGAGTGTTCGGGTTTCGCTGGGGCCTCGCGGCTCCAGAGCCCAGC
1528	CYB5A	4001	82.247688077981	91	NM_001914	GGGGAATGTCCCGGGTGGAGCTGGCTGAGTCGCGCGCTCTGCTCCACCCGACGGGGCTGTGTGTGCTGGGCCTGGCTCGCGGCGAACCGAG
960	CD44	2532	133.438388625592	133	NM_000610	CTCATTGCCCAGCGGACCCCAGCCTCTGCCAGGTTCGGTCCGCCATCCTCGTCCCGTCCTCCGCCGGCCCCTGCCCCGCGCCCAGGGATCCTCCAGCTCCTTTCGCCCGCGCCCTCCGTTCGCTCCGGACACC
9685	CLINT1	3353;3353	150.599164926931;150.599164926931	157;157	NM_001195555;NM_014666	GGCGGCGCCGCTGCTGTGGCAAAGGAAGGAGCTGACTGGGGGAGTTCGAGGCGGCGGGCGGCGGTGACCCCGGCCTGGAACTGCCCCGGTACGGAAGTGTTCCGGGGTCCGTGGGGAGCAGGAGAGGGAGGCGGCGGACCGTCCCGCGCGGGGCACG;GGCGGCGCCGCTGCTGTGGCAAAGGAAGGAGCTGACTGGGGGAGTTCGAGGCGGCGGGCGGCGGTGACCCCGGCCTGGAACTGCCCCGGTACGGAAGTGTTCCGGGGTCCGTGGGGAGCAGGAGAGGGAGGCGGCGGACCGTCCCGCGCGGGGCACG
79813	EHMT1	383	13.98955613577	13	NM_001145527	GCGGGCCCGGGCC
5441	POLR2L	927	23.8284789644013	25	NM_021128	GGGCAGTCTGGGACGCGCCGCCGCC
7168	TPM1	98;183;183;183;183;183;98	12.224489795918;27.48087431694;27.48087431694;27.48087431694;27.48087431694;27.48087431694;12.224489795918	13;33;33;33;33;33;13	NM_001301289;NM_001018020;NM_001018006;NM_001018004;NM_001018007;NM_001301244;NM_001018008	ACCGTCCGGCGCG;GCTGCAGCCCCAGGGCCCCTCGCCGCCGCCACC;GCTGCAGCCCCAGGGCCCCTCGCCGCCGCCACC;GCTGCAGCCCCAGGGCCCCTCGCCGCCGCCACC;GCTGCAGCCCCAGGGCCCCTCGCCGCCGCCACC;GCTGCAGCCCCAGGGCCCCTCGCCGCCGCCACC;ACCGTCCGGCGCG
23385	NCSTN	900	53.216666666667	26	NM_001290186	GGGCTTCCGCTCAGCAGAGAGGCAAG
54976	C20orf27	770	630.011688311688	632	NM_001258430	TCCCTTCCTCGTGCTCGGCGTTGAGCTCCTGCAGCCGCCGCCGCTGCAGTGGTCGTCCCTGCCCTCCCCGGCCCCGGGGTGCACCCCGCAAGGTGAGGCCACCCCTCTGCTCCCTGCCTCCCGGTTCCTTCCCGTTCGCCGAGGTCCCCTCCCGGTCCCGGCCCTGTCCTGAGCAGTCAGTGCCTGGGACCCCAGCGGCCGTGATGGCAGGGCTGGGGTGGGGGGCTCCGCTGTCGGGGCCGGGCCTGGAGGACTCCCCAGCACCTGAACTAGAGTGATGTCAGGTTCCCGGGGCGCAGTGACCGTTAGCTGGTGCAGCTGGGGTGTTTTCCGCGAAGCGATTGTCCGGGGGCATGAGTGCGGTAGTGAGGGCGGGGGCGTAATGGGGTCAGCGCCCCC…
79800	CARF	148	294.716216216216	296	NM_001282910	GTCGTGGGACTGCTCTGCGCGCTCCCGGTGGGGCGCGCCTGCGCATTATGCTGGTCTCCATGGCGGGGCCTCGGAGCCAAGACGAGAGAAAATGCTGCTGTGAAGACCCAATTAAAGCTTTCACATAAATGAAGCTACAGCTATCATGATTTAGTGCCCCCAAAAGGAAGAACTTCAGTGGACAAGAAAGGACATTTCTGGGGGTAGTAGAATGCTTGAGGCCTGGAATTTAAACCTGAGCCACTATCTGAAGCTATTAAATAATAGAAGAAAATGGAATTGAATATGATGTCAGC
63875	MRPL17	4283	22.259631099696	17	NM_022061	GGGCAGAAGTTGGAAAC
340277	FAM221A	830	39.812048192771	45	NM_001300932	GAGGTCAGCTGGTCCGCAGGGAAGCCTTTGGCTTCCCCACCGGCA
6908	TBP	430	109.906976744186	98	NM_001172085	GAGGTCGGGCAGGTTCGCTGTGGCGGGCGCCTGGGCCGCCGGCTGTTTAACTTCGCTTCCGCTGGCCCATAGTGATCTTTGCAGTGACCCAGGGTGCC
115353	LRRC42	72	185.625	196	NM_052940	GCCGGTCCCGCGGTCCCACGGCGCCTGGTTGCCCCCAGCCCCCTCCCTCCTCCCACCTTCACTGTGTCCCACCCTTCCTAGCTTTGTGCCCGGGGTGCTGAGCCCTTCCCCGTCAGCCGGGCCGCGGGAGGAGGGAGCCGTCACCGAGGAGCTGCCGCTCGCTGCCCCGGGCAGGGGCACAGTTGCAACCAAGGCA
128989	TANGO2	81	326.913580246914	328	NM_001283106	ACCTGCCCGAACCTCTGCGGCGGCGGTGGCAGGGTACGCGGGACCGCTCCCTCCCAGCCGACTTACGAGAACATCCCCCGACCATCCAGCCCCGAGCAGGGACTGGCAGAGCCGGCGCCCCTTCCCCGGACTCTGGCCGCGTAGCCTCCGCCACCACTCCCAGTTCACAGCTCCATGCGGACAGCTGTGAGGCCCCCGGAGAAAGCCACAGAGAGAAAATGCTTTCAGCTGGGTGTCAAGAACTTTTCAAGAGTGGCAGCTGTTGAAATCAAAAGAGTGGCCACAGAAGACCTCGCGACCTGTGTCAGCAGAGCCGCCCTGCACCACC
84678	KDM2B	231	96.4329004329004	112	NM_032590	GTACGTGTGTGTGTCCACATCTTTGAGTGCCGGGAGTTTAAAAGTTAGGCAGTCCTTATAGGTATGGAAGCCGAGCTAATTTCCTTCTGAGCCCCCCAAATGCCTCCTCCAC
151648	SGOL1	1384;1345;1384;1384;1345;1345;1345	270.492052023121;156.95687732342;270.492052023121;270.492052023121;156.95687732342;156.95687732342;156.95687732342	266;155;266;266;155;155;155	NM_001199256;NM_001012411;NM_001199253;NM_001199251;NM_001012409;NM_001012413;NM_138484	GAATGTGGCGGCGGTAGTTCCAGGCGACGGCGGACGGTGGTACGGTCCTGGAGGGCCCAGTGCGCGGGGCTAGCCGTGGCTGGAGAGCTTCGAAGAGCCTTGAAATGTGAGGAGGAGGAAGATAGCTGTTGCAGAAGTAGTGGCCAAGGTATCGTTCTGGACGCGCCTGCGGCAGGAGGGTCGCCGCGTCCACTTCCGCCAGCCCCACCTCCCCCCGGCCTTCCTGGAGTCCCTGAAAGAGGAAGAAGTAGGTTTTAAGGCAAAAG;GAATGTGGCGGCGGTAGTTCCAGGCGACGGCGGACGGTGGTACGGTCCTGGAGGGCCCAGTGCGCGGGGCTAGCCGTGGCTGGAGAGCTTCGAAGAGCCTTGAAATGTGAGGAGGAGGAAGATAGCTGTTGC…
994	CDC25B	114;114	181;181	181;181	NM_001287518;NM_001287517	GGGGACGCGGTGCATCGCTACTGCGCCCGGCGGACAGCGACTTGCTGCTCAAAAAGAATAAGAACCAGGGTTTTTGTTTGTTTTTTTTTTTTTTAATTAAGGTAAAAATAACGCACTTTTTTTTTTGCGGAACCTGAAAAATTCAAGAAGTTGAAAAACGCTTTTCACGTCACCTGGAGAG;GGGGACGCGGTGCATCGCTACTGCGCCCGGCGGACAGCGACTTGCTGCTCAAAAAGAATAAGAACCAGGGTTTTTGTTTGTTTTTTTTTTTTTTAATTAAGGTAAAAATAACGCACTTTTTTTTTTGCGGAACCTGAAAAATTCAAGAAGTTGAAAAACGCTTTTCACGTCACCTGGAGAG
6880	TAF9	2217	165.953089760938	156	NM_003187	GCCGTCGCGGCGGGGACCATGTTGCTTCCGAACATCCTGCTCACCGGTACACCAGGGGTTGGAAAAACCACACTAGGCAAAGAACTTGCGTCAAAATCAGGACTGAAATACATTAATGTGGGTGATTTAGCTCGAGAAGTCTGATCATCGGATATC
8773	SNAP23	220	100.536363636364	113	NM_130798	GCGCGGGCTCGGCGCGCGCAGGCGCGACTAGGGTGCAGCGCCAGGTCCGGTGTTGGGGTGTCCGAGTTGCCGCCGGAGAGGAGTGGCCTCGCCCGCTTGAGTTTTGATTCATC
409	ARRB2	58	78.810344827586	70	NM_001257329	AGGGATCTTGGCAGCGGGCGAGGAGGCTGCGAGCGAGCCGCGAACCGAGCGGGCGGCGGGCGCGCGCACC
85021	REPS1	98	560.908163265306	571	NM_001286612	GTCACTGTTGGTGCGGGCGCGTCGGGGCCGGGCCGGGGCACTGTAAATGGCGGCGGAGGGAGGCGGAGCGGCGGCCACGCTCAGCCCAGATCCCCCGAAACTTTAGGTTCGAAGCCCCACAACTTTCCGGGAAGCGCTGCCGCTCCGGAGGCGTGGACGGAAGGGGAAGCCGAGGCGGGAAGTCTGGGGGAATCGGCAGGGAGCCGGGGAGACTCGAACCCGCGGCGGGGGCGGAGTCCGCCAGTGCCTCGCGCCTCCGCGGCCCCCGCCTCTTTCTCTGCACCCTCCCCGCGGCCGGAGCCGGAGCCGGAGCCGGAGCCGTAGTCGCAGCCGCAGCCGCAGCCGCGCGCCGGGCCTCGCAGGCAGCGGCGCGGCGAGCGCAGCCGGGCCCCCTCCTCG…
10038	PARP2	143	51.4755244755245	38	NM_001042618	TCCTTGGAGCGGGTTGATGACGTCAGCGTTCGAATTCC
3735	KARS	455	125.059340659341	122	NM_001130089	ACTTTTGGGTCGGGCCCTCCGGGAAGATGGCGGCCGTGCAGGCGGCCGAGGTGAAAGTGGATGGCAGCGAGCCGAAACTGAGCAAGAAGTGGTGGTAATCATTAGTTCCAGGGTGCTCTGCC
6637	SNRPG	6358	73.2079270210758	91	NM_003096	GCCAGACGCAAGACGCCGGGCCTACAGCGGGAGCGTGAGGAAAGCCGTGCGTTGCGTTCCAAGGCATCTGTGAGCCCGCGGAGTATACACC
56983	POGLUT1	566	31.991166077739	35	NM_152305	GCCGCAGCGGGGAATCTGCAGTAGGTCTGCCGGCG
2548	GAA	129	216.46511627907	245	NM_000152	GGCGGTCGGCTGCCCGCGCGGCCTCTCAGTTGGGAAAGCTGAGGTTGTCGCCGGGGCCGCGGGTGGAGGTCGGGGATGAGGCAGCAGGTAGGACAGTGACCTCGGTGACGCGAAGGACCCCGGCCACCTCTAGGTTCTCCTCGTCCGCCCGTTGTTCAGCGAGGGAGGCTCTGCGCGTGCCGCAGCTGACGGGGAAACTGAGGCACGGAGCGGGCCTGTAGGAGCTGTCCAGGCCATCTCCAACC
29097	CNIH4	4524;4526;4526;4526	498.584217506631;31.574679628811;31.574679628811;31.574679628811	505;38;38;38	NM_001277199;NM_014184;NM_001277200;NM_001277197	GGGTTTGACGGAAGGAGCGGCGGCGACGGAGGAGGAGGATGGAGGCGGTGGTGTTCGTCTTCTCTCTCCTCGATTGTTGCGCGCTCATCTTCCTCTCGGTCTACTTCGCCAGTTGCAGTGGCTGACACCTGTCCCCAGTACTTTGGGAGGCCGAGGAGGGAGAATCACTTGAGCCCAGCGGTTCGAGACCAGCTCTGGTAACATAGGGAGACTTCCTCTCTACAAAAATAAAACAAGAGGAAAAAAAAAAGAAACATGTTTCAGGTCTGTGTCTGTGTAATACAAAGATGACTGCAGCCTACAGTAAGAAATCCAGAGACTGAAGGCTATAGCTTTAGGGATCTGATATGGATCGCAGAGTATTAGTATAACATCAGCTGACATTTTATTGAGTGCCTA…
5439	POLR2J	52053	46.421205309973	39	NM_006234	GGCGGACCCTTGGGGTCTGGACGCAACGGCGGCGGGAGC
2852	GPER1	2926	521.828434723172	528	NM_001098201	GGCTCAGAGGGAGGACGCACCCGCCAGCCAGCCGGGAACCTTCCCTCGCGGGCTCCCAGGGCGGGTCTCTTCCTCTCTCTAGCCCTGCTCAGGCATTCGGCAGGTCCAGCAGAGGTACACCTCCTGCAGCGGGTTCCAAGTGCACCTCCAGCCTGATGGGCCTGACCAAGGAGGCTTCCAGGAGCACAGAAGGGGCTGCAACCCAGGTACCCAGAGAGTGAGCAGCTCCACGCGGGACTGTGCACGGTGGCCGACACCCGCAGGGACGCCCGCCGGACGAGCACGCGGAGGGCCCTCGCCTCCACGGATGCACCATGCCGGTGTGAGGAGCATCTGTTCTTCCCACTCTCTGCAGTTAACAAACCCAACCCAAACCACCACAGGTGCTCCTCCTGGGGA…
81929	SEH1L	519	67.400770712909	82	NM_001013437	GGTCTGGCTAGGCTACGGGCCACGCGCCGCCGCCGCTGCCGCCGCCACTGTCCTCTTCGGAGGCGCGGGCCCGACGGAAACC
34	ACADM	459	108.838779956427	109	NM_001286042	GGGCGGGACCAGAGGAGTCCCGCGTTCGGGGAGTATGTCAAGGCCGTGACCCGTGTATTATTGTCCGAGTGGCCGGAACGGGAGCCAACATGGCAGCGGGGTTCGGGCG
25972	UNC50	162	135.814814814815	125	NM_014044	GCGCCCCAAGGGCCGGCTCCGTTGAGGGAAGGGAAGCCCGCCCGGTGGCGGCTGGGGTCGGCTGCTGGGAGGAGGTGGTGGGCTGGTTCGGACGTGGGTCGAGGCTGTAGCAGGACTCCAGGAAG
23658	LSM5	5456	26.1226173020528	19	NM_012322	GGCCACTTCCGGCGTAGCC
11116	FGFR1OP	773	19.875808538163	16	NM_007045	GTCTTGGAGAAGCAAG
64768	IPPK	284	60.869718309859	38	NM_022755	GAGTCCTAGCCCGCGAGGCGCCAGGGCTGCGCCTGGGC
84233	TMEM126A	117	167.384615384615	65	NM_001244735	TAGCAAACAGTCTTTTTCGACGCATCTTGAATGTGACAAAGGCTCGCATAGCTGCTGGCTTACCA
5298	PI4KB	4053;4043	305.458672588206;320.16225575068	427;441	NM_001198774;NM_001198775	ACCCGACTCCTTAGATTACTATGGAATCGGTAGGGTCCTGACCGCTGGGGAAGCAGGAAAGCGTATCCTGGGAAGAAAGGCTTGGCTTGGACTCCGGAGAAGAATACTACATCGAGACCTGCTGGGGAATTTTATTTTATTTTATTATTTTTTTGGTCTTGGTTGTACTGAGGGAGGAAGAAGAGGTTGTGTGGCCCGGTCGAACTTGTGGCAGCCTGAAGGCCCCCTCAGGCGGCGCCGCGGGCAGCCCCGCAGCCGGGGCCTGGTGCAGCCTCCGCGGCCGCTGTCAGGGAAGCGCAGGCGGCCAATGGAACCCGGGAGCGGTCGCTGCTGCTGAGGCGGCAGTGTCGGCAGTCCAACCGCGACTGCCCGCACCCCCTCCGCGGGGGTCCCCCAGAG…
10009	ZBTB33	454;454	164.687224669604;266.687224669604	188;290	NM_006777;NM_001184742	GTCGGCGGCGTGGGGCAGCTGTAGCAGCGTTGGCGGCAGGAGGCGGCGGCCGCGTCGACGTCGACCCAGACTGGAGCGACGTTTAAAGAAGGGGCAGAATCGCTGGGGAGTGCGGCTTCTTCTTGTTGGGGGACTCCCAGCCTTCCGCGCGTCCGGAGGAGGAGAAGCGGCGGCGCCGGGAAGCAGGC;GTCGGCGGCGTGGGGCAGCTGTAGCAGCGTTGGCGGCAGGAGGCGGCGGCCGCGTCGACGTCGACCCAGACTGGAGCGACGTTTAAAGAAGGGGCAGAATCGCTGGGGAGTGCGGCTTCTTCTTGTTGGGGGACTCCCAGCCTTCCGCGCGTCCGGAGGAGGAGAAGCGGCGGCGCCGGGAAGCAGTGTCTGTTGACTTCACTTGGCACT…
64343	AZI2	276	421.684782608696	448	NM_001134433	GACTTCCGGTTTCCTCGCGCGTCCCTGGCGCCGAGCCCGCGGACAGCGGCAGCCCCTTTTCCGGCTGAGAGCTCATCCACACTTCCAATCACTTTCCGGAGTGCTTCCCCTCCCTCCGGCCCGTGCTGGTCCCGACGGCGGGCCTGGGTCTCGCGCGCGTATTGCTGGGTAACGGGCCTTCTCTCGCGTCGGCCCGGCCCCTCCTGCCTCGGCTCGTCCCTCCTTCCAGAACGTCCCGGGCTCCTGCCGAGTCAGAAGAAATGGGACTCCCTCCGCGACGTGCCCGGAGCAGCTCCCTTCGCTGTGGAAGCGGCGGTGTCTTCGAAGAAACCGGAAGCCCGTGGTGACCCCTGGCGACCCGGTTTGTTTTCGGTCCGTTTCCAAACACTAAGGAATCGA…
4267	CD99	827	31.523579201935	35	NM_001122898	ACTCCGGGACCGTCCCTGCGCGCTCTGGGCGCACC
5347	PLK1	7801	41.2926547878477	64	NM_005030	GGGGAGGAGCGGAGCGGTGCGGAGGCTCTGCTCGGATCGAGGTCTGCAGCGCAGCTTCGGGAGC
168451	THAP5	1028	92.996108949416	143	NM_001130475	GTCGACAGACGAGGCGGCTTTCCCGGCAGAATGCTAGCGCAGGCGCAGGGGCTCGAGAGGCCTGGACCTGTGGCGCATCCTCAGTGAGGAGGGCCGCCCTGCATCCGTCGCCGGCCCCGGTCTCCAGGGGCCTCACCCGAGTC
10211	FLOT1	50	120.72	116	NM_005803	CAGGAAAGCTGGTCTGCGAGCGGCCCCTGCCCGGCTCCCAGGTCCCTGCGCGACCCCGCCCTTCCCGAGACCCCAGCCGGGCTGCCGCCCGCGTCCCGGAAGCTCCAGCCTGAACC
284613	CYB561D1	86	53.2209302325581	72	NM_001134403	ACCGCCTCCGCGATCGCAAACCCGGAAGACGTGTTCGGGCAGCTGGAGTGTACGGGCCCGCGGGCCACGGCC
152756	FAM218A	217	57.5023041474654	57	NM_153027	GACCGTGAAGGTGTGGCGCGACGTTGGAGACCGGGGCAGCGCCATGTACCACAGTGG
9149	DYRK1B	234	235.773504273504	253	NM_006483	GGGGGCCGGTTTGTTGTGGTCGCCATTTTGCTGGTTGCATTACTGGGTAATCGGGGCCCTGGCTTGCCGCGTCCGCCGGATACCCTCAGCCAGTGGGCAGGTCTGAGCTCGGGCTCCCCGAGCAGTTTGAGTCCCCTTGCCCGCTCCTTCAGGTCTCAGCGGCGGTGGCAGCCGAGGTGCAGGATGCAAGAAGGCGCCCCCCGGCCGGGCTCCCGCTCCAGGCCTCGCTCCCCTGCGGCCCTCTGAGCCCACC
6499	SKIV2L	647	228.61514683153	285	NM_006929	CGGGGGCCCCACGGTCTCCGGCCGCGCCCGCGCTGGCCGCTGATAGCGGGCTCACAACGATGACGTAGCGAGGAGCGGAAAACGCGGTAACCAAGGCGGCCCCAGGCGCGCACTTCCGCCCGGCCTTCCACCGGTCCAGGTCTGCCCCTCCGCAGCGATAGTTCACGCTCTCGGCGGGGCTGTACCGGAAGTTGCCTCTACTTCCGCCCGTTCCGGGGCGGGGCTTACTTCGCAGCGACTACTTGCCGCACTTCCGGGCTGCCAGGCAGCTGCTGTGGCTCCAGG
6181	RPLP2	59	96.3389830508475	121	NM_001004	GAGCCTTCTGGGTAGCGGTTTAACCCCGCCTCTTGCGTCGGCGCCTTCCTTTTCCTCCCTGTCGCCACCGAGGTCGCACGCGTGAGACTTCTCCGCCGCCTCCGCCGCAGACGCCGCCGCG
200014	CC2D1B	541	80.070240295749	61	NM_032449	GGTGCCGGGTGAGACAAGGCCGGGGTTTGGCTCGGATTCACCGCGAGGTATCTAGGCTGCC
170384	FUT11	58	66.8103448275862	71	NM_001284194	CTCGTCCGGTCACGACTATCCGCTGGGCGGGGTCGGTGCTGGCCGAGGGGGCGCCGGCTGCCGGAGTGGAC
151246	SGOL2	55	89.309090909091	94	NM_152524	GCCAACGGCTGTGGCGTTTAAACCCAAGCCGCAGCCGCTGCTGCTCGCCGAGCTCCCGGAGCTGGGTGGGGGTGCCCCACGCTGAAAGAGAGTG
55756	INTS9	159;159;159	85.930817610063;85.930817610063;189.930817610063	96;96;200	NM_001145159;NM_018250;NM_001172562	GATGCTCTCGGCTGGCAGGTGGCGGAGATTGCACCGGAAGACGCTTCCTGGGTTTGAGGAGTTCAGTGACTGCTATTGAACCACCAAAAGTCCATT;GATGCTCTCGGCTGGCAGGTGGCGGAGATTGCACCGGAAGACGCTTCCTGGGTTTGAGGAGTTCAGTGACTGCTATTGAACCACCAAAAGTCCATT;GATGCTCTCGGCTGGCAGGTGGCGGAGATTGCACCGGAAGACGCTTCCTGGGTTTGAGGAGTTCAGTGACTGCTATTGAACCACCAAAAGTCCATTATGAAACTGGTGAGTCTTCGCTCCTAGGTCAGAGGGCAAAGTATTGCCTGTCAGGGCACCCAACCTTACCATGCAATGTGCTCAAATTCAAATCAACCACCATT
101929372	LOC101929372	2377	964.795540597392	1043	NM_001288707	GAGACAGGGTCTCGCTCTGTTGCCCAGGCTGGAGTGCAGTGGCACAATCAGCTCACTGCAGCCTCAACCATCTGGGCTCAAGTGATCTTGCCACCTCAGCCTCCCGAGTAGCTGGGACTACAGGCACGCACCACCACACCCAGCTAATGTTTTCATTTTTTTTTTTTAGAGACAGGGTCTCACTTTGTTGCCCAGGCTGGTCTCAAATTCCTGGGCTCCTGTCTCGGTCTCCCAAAGTTTCGGGATTACAGGCGTGAGCCGCCGCACCTGGCCAGGTTACTGTTGGTATAGGAAGTCTACCCGCAAGTTTAGGGAGCTGGAGGCAGCCCTAACACGGAGGGAAGCATTGTCTTCTCATGCCAGGTTTAGCTCCCACCATTAGCCGCAAATTTTATGTAT…
5892	RAD51D	75	165.44	145	NM_001142571	CTCCTCCTCTCTCCTTTCTCCTCCGGCAGCCAGCGCGCCTGTGTCCTCTCTAGGAAGGGGTAGGGGAGGGGCGTCTGGAGAGGACCCCCCGCGAATGCCCACGTGACGTGCAGTCCCCCTGGGGCTGTTCCGGCCTGCGGGGAAC
65010	SLC26A6	308	76.467532467532	84	NM_134263	ACCCGGTCCCGGCGCCGCCTTCCGGAGCGTAGCGGCCTCTAGCTCGAGCAGCAGGAGCAGCCCGCACCGGACAACTTGCGAGCC
3547	IGSF1	470	159.931914893617	160	NM_001555	GTCCTTAGACAGCTCTTCTCATGCCGGGCAGTTTGCTGCATCTGGAGGAGCTCACTGGAGAATCTCCAACATCGGAGCGGGCCTTCAACTACCATCCCACCACCTGCTGAGGAGAAAAATTCTTCAAGACTCAGAGCACACAGCCAGCACCAGAGGCCCC
23341	DNAJC16	475	861.854736842105	874	NM_001287811	CCCCTCCCCAGGCCCAGGCGAGCGCTGGTGTGGACGGGAAGCTCCCGGCCCGGCGAACTAACTGGAGCACGGAGCTGCAGCCGGTTGGGCCGGTGTACTTTCCCGGCATCCTGACAAAAACAAAGATCCTGGAGCAGAAGACAAGTTCATTCAAATCAGTAAGGCTTACGAGATTCTTTCAAATGAAGAAAAGAGATCAAATTATGATCAATATGGAGACGCTGGAGAGAACCAGGGCTACCAGAAGCAGCAACAGCAGCGAGAGTATCGCTTCCGCCATTTCCATGAAAATTTTTATTTTGATGAATCCTTTTTTCACTTCCCTTTTAATTCTGAACGGCGGGACTCAATTGACGAAAAGTATTTATTGCACTTTTCACATTATGTGAATGAAGTGGT…
100188893	TOMM6	4907	24.287548400245	33	NM_001134493	TCCTCCACCGAGGCCCATGCGAAGCTTTCCACT
83596	BCL2L12	1129	176.302037201063	292	NM_001282519	GTACACAGCCTGCCTTTCCACTCTCCGTGCAGACCCATCCTCTTTCCCGCTCCTCGCTCTCGGACGCCACCAACGCTCTCCCGGGCTCTTCCGCGTTACCTACGATGGAAGGTCGGGGCGTGCGGGCAGCTGGAACCCACCCCTGTCTTGGAGCTCCGGGTAGCTCTCAAACTCGAGGCTGCGCACCCCCTTTCCCGTCAGCTGAGCTCTAGAGCGCTGGGGCTTTCTTTTTGATCGACTTCTTGAAATAAAACCAACTTTATCATTCTTTGGGTAACAGACCCAAAAGCCG
158584	FAAH2	64	61	61	NM_174912	GTCCTTTCCCCAGGGTGCACGTAACCCTCAAGCACTAGGACCGTGCGGAATCCAGGCTGCG
80210	ARMC9	90	209.022222222222	209	NM_001291656	TTCGGGGTCGCCCACCTTCCCTCCCAGGCTGCTCCGCGTCGGCGGCGCCCCGCGCGATTGGCTGCGCCGCCCCCACGTGACGCCGGGGTGGCGGCGGCGGTTGCCCGGGTGACGGCTGCGGAGGTGGCGGCCGGGCTGGGATAGCGCGAGTGTCCGCGGCCGAGCAGCAGATTTTTGCTGTGAGAATTAATTACCAGTAACAGTTCAAT
9344	TAOK2	3149	792.494442680216	812	NM_001252043	ATCTTGGAATTGGGAGGAAGAGGGAGAGGGAGACCGGGACGAGACCGGGGCTGTGGTGCGGAGAGAGGCTGAGACGGAGAAGAGGAGAGGCAGAGAGGGCGCGGGGACCGTCAGCAGCACCTTAGCTACAATCGTTCAGCTATTCTCGGAAGAGAGAAGGGAGAGGGAGGAGGCCGGGGCGGGAGTGGGGGCTGTCACCCTCGGACCCCGGCGTGAGAGGGGCCGTGCGGCCGGACGTCCTCGGGGTGGGCCCCCAGTCGGTGGCCGAAGACCTACAGCTCAGGCCCCTGGGTCCCAAATTTCCAGGCTTTGCCCCTCCTCCTTTCTCAGATACCCGGGTAACAGTCCTCATAGTCCAGATATCCGGGACTCGGGTCCCAACCTCTCTAAACCTGGGTC…
57085	AGTRAP	2532	52.489336492891	31	NM_001040197	TGCGGCGCAGGTGCCCTCGGCCTGAGTCGGG
64771	C6orf106	118	146.686440677966	143	NM_022758	GACTGTGAGAGGCCCGGGGCCTACCTCAAAGGAGCGGGGTCGCGAAGCTAGCTAGCAGCGGCCCCCCTCCAGGTCCCCGGGCCCGGCGGCGCGGCGGCGGCTTGGTTGTGAAGAGGCGGGGAAGCGGGTGTCCGGTCCCCGCC
140576	S100A16	4961	115.370892965128	104	NM_080388	GAGCGCAGGGAGCTGCTTGGCAGTGCCAGAGCCCAGGCCCCAGAGCCCTGCTGGAGAGGAGGCAGACTGAGGCAGCAGGCCCCGCCAGCAGGCGAAGCAGGGAG
55055	ZWILCH	113	501.274336283186	410	NM_001287822	CCCTGACGTCGCCGGTCCGGCGCGCAGTTCAGTTTGGCGGTTCCGGTACCGCTCTCACATTGGGGCGGGATGTGGGAGCGGCTGAACTGCGCAGCAGAGGACTTTTATTCTCGTCTCCTTCAGTGTCCTGCAGAGATAAAGTGATGACTGACTCCTGAGTGTGAATAACGGGAGAGATAATGTAGTTCTGTTTTTCACATGTGGTTCTGCGTTTCAGGAAATTTAATGAAGAAAAGAAAGGAATCCGTAAAGACCCATTTCTCTATGAGCCTTTAGAAAAGGAAGAAACAAGTCATATTGAAGAACTTCAATCTGAAGAAACTGCCATATCTGATTTCTCTACTGGCGAAAATGTTGGACCACTTGCTTTACCAGTTGGGAAGGCAAGGCAGTTAATTG…
10062	NR1H3	244;752	192.790983606557;71.75	200;86	NM_001130102;NM_001251935	GCCGCCATCTTACTTAGGGACCTGCTGGGGTGCGGGGAAAAGGCGCAGTCTCGGTGGGATTGCGTGCAGGAGGGTCGTGGTCTGGCTGTGGCGGAGGAGCATAAGAAGACTCTGCGGTGGAGCTGTGGAAGCCAGGCGCACAGGATGCAAGCAGCCAGGCCCAGGGAGGCAGCAGCTGCATCCTCAGAGAGGAAGCCAGG;CACCACCAGGTTCACGCCGAGAAGGAGCTGGAGGAGAGCCGCCCGGCTCCAGCCGGACCGCTTGCCCGCCATCACCGTTGTAATCT
10855	HPSE	64;64	38.515625;38.515625	36;36	NM_001199830;NM_001098540	GGCAGCTGGCGGGGGGAGCAGCCAGGTGAGCCCAAG;GGCAGCTGGCGGGGGGAGCAGCCAGGTGAGCCCAAG
80772	CPTP	429	159.904428904429	155	NM_001029885	CCCTTCCTGGGCCTCTCGGTGGAGCAGGGACCCGAACCGGTGCCCATCCAGTCCGGTGCCATCTGAAGCCCCCTTCCCAGAAAATGAGCCACAGAGCAAGCTGACCCCAGCGACACAGCCCCCCAGCCCTACTGTATTTCCGTTCCTATCAAAAA
1739	DLG1	1223	235.695829926411	237	NM_004087	GGTGGGGATCTACCCCCGGGGTCGCCAGGCGCTGTCTCTGCCGCGGAGTTGGAAACGGCACTGCTGAGTGAGGTTGAGGGGTGTCTCGGTATGTGCGCCTTGGATCTGGTGTAGGCGAGGTCACGCCTCTCTTCAGACAGCCCGAGCCTTCCCGGCCTGGCGCGTTTAGTTCGGAACTGCGGGACGCGCCGGTGGGCTAGGGCAAGGTGTGTGCCCTCTTCCTGATTCTGGAGAAAA
6601	SMARCC2	6207	22.586112453681	22	NM_139067	GGCGGGGCCCGAGCCGGAGAAG
283726	SAXO2	71	56	56	NM_001008226	GGCGGGCGCTGTGGGAGTGGAGAAGCTGCAAGTGCTGAGGCGCGGTGGAGGAAAGC
54187	NANS	9029	82.166463617233	74	NM_018946	GAACAGAGTAGAGGCGGCGGCGGCGGCGGCCGGACCCAGACTGGTAGTGAGGCTTTGGACCCCGAGCCGCTGCA
23613	ZMYND8	2494;2499	291.04410585405;106.955982392957	220;36	NM_001281772;NM_183048	ATGTTTTATAAGTATTGACATTACACAGTGTTAACAATGCATCCACAGAGTCCCAAATCTGCCAGCCTGTTCTCTCTTCCTAACTGTGGAAAAATGAGACGGTTGCTTGAACATTTGTTGGCAGCATTCCTGCCTGAAGTATTCAGCTCCTCTAGGCTGTTACAAGCCAAATAATGGTTCCCTTGAATGCAGCCTTCCTCCATGATCAATACACCTTTGA;ATGTTTTATAAGTATTGACATTACACAGTGTTAACA
113179	ADAT3	95	217.621052631579	210	NM_138422	GGCCGGTTGCTAAGACTTGGCGAAGCGCTGCGCTCGCGCCCGGATCCCTCAGGGGTTAGCAGGACATGAGGGAGTGTAGCTCTGATGCGGTGACCTGGGCCGGAGCCCTCGGACTAGCCTCAGCTTTGGTGGCAGCACGCCCTGCCTTGTGGAGCCACGGCCTCCCGGGACGGACTCCCCGGCTCTCCCCCAGCCGCCCGCAGCCGCCGG
7029	TFDP2	85	100.458823529412	100	NM_001178142	GTAGAATGTTGTTGGTACTGCAGTGAGAGGCATGCTTCCTTAGACCAGTAAACGAAGCAAAAAAGGAGATAAAAATGGGAAAGGCTTGAGACACTTTTCA
51115	RMDN1	2226	53.93935309973	45	NM_016033	GTAGCTGCCTGAAGTAGTGCAGGGTCAGCCCGCAAGTTGCAGGTC
400961	PAIP2B	252	186.896825396825	190	NM_020459	GGCAGTGTGCAGTAAGAGATAACCTGGCAAGTGGTAGTGGCGCTTCTCGGGTGCTGTGCTTCACGTTTTGGTACTAAAGGCCGAGACTGTTGTGGCGACGGCGACCTCTACGGCAACGGCTTAAGCTCTCGGAGGAGTGGCAGAGTACGATCTGAAGGAGGGGCTTCTGGTTAGCCCAGGTTCCATCATA
23518	R3HDM1	386	395.738341968912	385	NM_001282799	GGCTGCCGCTGGAGCCGGTGTCCGGGCTGGTGATGGGGTTAATTCCCTTTCGTAAGACTCTTACTTGCACCCACCCAGCCCCGCCGTCGCCCCGCCGCGCCGCGCTCCAACCGCCTCCTCCTCCTCAGTAACGCGGGCCACGGAAAGGTATGATATATTTGATCCAAGACAGTCCATTCCAGTCCGGGAATCTACAGTGGTGACAAGGACATGGGACTCCTCCTGCCAGATTACAGATGGTTCACTACAGTTGACATCCTGGCTGACAACTGTGAAAAAGAACCTTGGATTATTTTATTTTATTTTTGTGGGACACCACAATCCCAAATCCAAAGGACGCATCAGGCTTCAAGCTCCCTGTAGAATTCGAAAATAACCTTTTCTA
348180	CTU2	291	26.460481099656	31	NM_001012762	GCCACAGTCTGCGACGGGACCCGGCGTGCCC
9223	MAGI1	1460	519.232876712329	568	NM_001033057	GCGGAATAGAATGAACTGTAACAAAACAAGCCGAGCCTTTGTATCTGCTTAAAGGGGCCGCGAGCACTTACCTCCCGCCCTGCTCCCCGCCGCCCCGCCACCGCGTCTTCAGGGCTCCCGGCAACTGGCTGGAAGGGCTTCCCTCACCCTCAGTAACAGCCTGCCAGCGAGGAGAGGCGAGCCGGGCGGGAGGCAAAGAGGAGGCACCGCATTTGTAAAAGGCAAGAGAGAAAGGAAGGAAGGAAAAAAAAATAACCCGAGCGGCGCAGAGTGGACTCTGGTCCGGGAGAGCACGGGCGGGCGCCGGAACGTGGACCCAGAGGCACCGGAATGCAAACAAAGCTCGCGGGCGCCTGTGCGGGGCTCGCGGGGAAGCCCAGAAAGTTTGTTTTATGATGG…
58486	ZBED5	290	434.127586206897	430	NM_001143667	AGCCGCGAATCGGATCTCTATGGAGATGGCCTAGGCGATATCCCTGAGCTGAGAGCATCACCCTGTCCCCGAATCCTTCTTTCCTCTCTGTTTTGTTTTTCATTCCCCTCCCTCTCTCCCCTCCCCCTCCAGTCCACGACGACTGGCTGTTGACCCTGTTCAGGCCTCGGTGAAGGCTTTTGGTTACTCCCCTTCCCACCCCATCCCTTAATTTTATTCTTTTGAAGAGTGCATTTCAAGCTGCCAAGGTGGAGAGAGGGATTACAGAAAGGAGAACACCTTATTTCAGAAAAGGTGTACCATACCTGAGAGCACCAGGAAGTCGCATGAGAGATCACCTGATACATGAACGTATGATGTTCCATCTGCGCATTGATGAATAGGCAGCATTTACAAATT…
54957	TXNL4B	1197	284.018379281537	234	NM_001142317	ACGGTACGCCAACAGGCTCTCAAGGCCTCCTCTGGGGCTCTGATCAGACACTTCCGAGTCTCCTTGTGACCAATCACTCTTAGCCTAAGAGACTACATCCCGCCTCTAGTCTGGGGGCAGGAAAAGGAGGGGAAAAAGGTCGACCATCTTTAATACGGGCGGAGGTGACGCCTAGCTTCCGGTCAGAGCCGAGCAAGGAGTGACAGTGAGGATTCACATTTGGGTTATTTCAAG
5265	SERPINA1	4059;4057;4059;4059;4059;4059;4057;4059	497.451342695245;223.673403993098;287.554816457255;327.535107169254;479.460211874846;290.553338260655;186.673403993098;519.440502586844	530;256;320;360;512;323;219;552	NM_001127705;NM_001127700;NM_001127707;NM_001127702;NM_001127704;NM_001127706;NM_001002235;NM_001127701	GCCCAGGGCATGCACTGCCTCCACGCAGCAACCCTCAGAGTCCTGAGCTGAACCAAGAAGGAGGAGGGGGTCGGGCCTCCGAGGAAGGCCTAGCCGCTGCTGCTGCCAGGAATTCCAGGTTGGAGGGGCGGCAACCTCCTGCCAGCCTTCAGGCCACTCTCCTGTGCCTGCCAGAAGAGACAGAGCTTGAGGAGAGCTTGAGGAGAGCAGGAAAGGGCGGCAGTAAGTCTTCAGCATCAGGCATTTTGGGGTGACTCAGTAAATGGTAGATCTTGCTACCAGTGGAACAGCCACTAAGGATTCTGCAGTGAGAGCAGAGGGCCAGCTAAGTGGTACTCTCCCAGAGACTGTCTGACTCACGCCACCCCCTCCACCTTGGACACAGGACGCTGTGGTTTC…
84068	SLC10A7	133	226.736842105263	226	NM_001029998	GGCGCTCAGTGAGACTTTCCTGTCACTGGCTACTACTACTCCCAACCCTCCTCAAAGCCGCCGGAGCAACCCCCAGGTCTTTACTTTACAATCGGCAATTTGACTTGCTCTGCTGCATGTCTGGAGGGACCAAGGAAAGTGTGGAGACGCTCCAAGGATTAGGTGATCGGAGCTTGAAAAGAAAAAAAGCCAAACAAATAAACAAAACCCACCCACCCTAACAAAT
79868	ALG13	2013;2013;2013;1777;2013;1777	450.811227024342;450.811227024342;346.811227024342;21.623522791221;313.811227024342;21.623522791221	451;451;347;14;314;14	NM_001257240;NM_001257237;NM_001257235;NM_001039210;NM_001257241;NM_018466	GAGGAACCCGCGCCATGAAGTGCGTGTTTGTTACCGTAGGGACCACCAGCTTTGACGACCTCATTGCGTGTGTGTCGGCGCCCGACAGTCTGCAAGTGAGTGAGGGAGGCGAGCAGGCGGCGGCTTGGCTCGCCACCCGCCATCTCCGGCCATACTGCCAGCCGCGTTAGCCTTGCCTGACCGTCGCGCTCGGAAAGAAACCCCCGCAACTCTACCACAGAAAATCGAGAGCCTTGGTTACAACCGACTTATCCTGCAAATTGGTAGAGGAACGGTGGTACCTGAACCCTTCAGTACTGAGTCGTTTACTCTGGATGTTTACAGGTACAAGGATTCCTTGAAAGAAGACATTCAGAAAGCAGATCTTGTTATTAGTCACGCAGGTGCAGGAAGCTGTTT…
3055	HCK	162	174.456790123457	155	NM_001172130	ACATCAGAGGCTTAGAGGCGAGTGGGAAGGGACTCAGACAGTGCAGGACGAGAAACGCCCGCGGCACCAAAGCCCCTCAGAGCGTCGCCCCCGCCTCTAGTTCTAGAAAGTCAGTTTCCCGGCACTGGCACCCCGGAACCTCAGGGGCTGCCGAG
2597	GAPDH	21124	73.321103957584	76	NM_002046	GCTCTCTGCTCCTCCTGTTCGACAGTCAGCCGCATCTTCTTTTGCGTCGCCAGCCGAGCCACATCGCTCAGACACC
10865	ARID5A	118	75.033898305085	75	NM_212481	ATCTCAGAGAGCGCGGGGTCCGGACAGCCGCGCGCTGAGGGTCTCGGGGCGGGCGCCGCGGGACCTCTCCGGGCC
7327	UBE2G2	2467	51.453992703689	57	NM_003343	GGCAGGAGGCACGCGCGCGGCTGAGGCGAGGTCGCTCGGCGCAGCTGTTGCGGGGCC
55317	AP5S1	490	165.90612244898	169	NM_001204447	GCCGCCATTGCTCTCCTGCCACGGAGGGGAGCGCTTGGTGGCAGTCCGCGGGCCCGGACGGAAGGCTGAGGCGACGCCTCGACGACAGCGGACCGGAGCTGCAGGGGCAACACATTCAGGGCGGGGTGCCCCATTTAGGCCTGGCTGACCGGACACCCACCCTGGAGCC
8086	AAAS	2376	119.642255892256	117	NM_015665	GTCCCTTGCGGTACCCGTCCGCATACGAATCTAGCCCGGGAACCGAGTTGCGGGAGTGCGGTCTGTGCCGTTCCGGCCAGGAGTTTGCCGACTGCAGACGTCCTGCGAACCGGCAAG
10645	CAMKK2	959	735.189781021898	783	NM_153500	CACTCCAGCCTGGGCAACACAGAGAGACCCTGTCTCAAAACAAACAAACAAACAAACAAACAAACAAACAAAAAAAACAAAGAAAAAAAAATGGGAGTGGGCCGGGCGCGGTGACTCACACCTGTAATCCCAGCACTTTCGGAGGCCAAGGCGGGTGGATCACGAGGTCAGGAATTCAAGATTAGCCTGGACAACATGGTGAAACCCCATCTCTACGAAAAATACAAAAATTAGCCAAGTATGGTGGCCGGCGCCTGTAATCCCAGCTACTCGGGAGACTGAGGCAGAGAACTGCTTGAACCTGGGAGGCAGAGGTTGCAGTGATCCGAGATCGCGTCACTGCACTCCAGCGTGGGCGACAGAGCGAGACTCCGTTTCAGAAAAGAAAAAAAAAAAAAA…
9798	IST1	3741;4608;4608	80.3060678962844;92.064453125;92.064453125	80;92;92	NM_001270979;NM_001270975;NM_001270977	GAGGCCGAGGGAGTCGCCATTTTGGATGGTGAACCCTGAAGTCGGTGTCTGCTGCGTTCACGGCAGGATTCGGTTAGCTA;GAGGCCGAGGGAGTCGCCATTTTGGATGGTGAACCCTGAAGTCGGTGTCTGCTGCGTTCACGGCAGGATTCGGTTAGGAGGAACAGCACAGC;GAGGCCGAGGGAGTCGCCATTTTGGATGGTGAACCCTGAAGTCGGTGTCTGCTGCGTTCACGGCAGGATTCGGTTAGGAGGAACAGCACAGC
60488	MRPS35	1416	27.925847457627	29	NM_021821	GTCCCCTCCGGCTTGCCGTCCTCGCAGCC
7993	UBXN8	162	11.9567901234568	3	NM_001282199	ACC
493856	CISD2	964	51.674273858921	44	NM_001008388	AGAGCGGAGGGGGCTCGGGAGAGGAGTGGACGCCGCTGGCCAGG
51634	RBMX2	1981	65.8011105502272	62	NM_016024	GCATGCGCTGCGCTGCCTTTCCCGGGCGCTGATTCCTGAGTGCTGAGCGCGAACCCGAGGAG
317749	DHRS4L2	181;154	455.972375690608;281	500;281	NM_001193637;NM_001193635	ACTGAAGCGGAGTCTAGCATGTGCGGCTGCTCCACAGCGGTGTGGGTGGCGGCGGCTCCTCTGCAGCAGCCTCGGCAGTAGGGGTCAGGGTGGCCAAGCCCACCGTGGAGCTCATCTGAGAGTTGTAAGGTACGGGACTGCCTCGGTCTTTGGGACGCCCCGTCTGGTAGCATCCCAGATCCAGCACGTTCCTTCCGGCCCTGCACCCCGGCCCGGTGCCTCACACCCCGCTACCCCAAGCATCCAGACTCTAAGGCAGCCCCTGCATCTCAGTCCTGACATCGCTGTCCCTGGAGCATCCTCCGCTGGAGCTGGAGCTTGACAGGATCGGCTTCGCCATCGCCCGGCGTTTGGCCCAGGACAGGGCCCACGTGGTCGTCAGCAGCCGGAAGCAGCAGA…
22888	UBOX5	1346	141.751857355126	126	NM_014948	GTCGCCGGAGGAGCCAGTATCTGTGTCGCCGCCGCCCGCGGCGTCCCCGGTTTGGTGTTGCGGCGCCCACCTTCGGGAGGATCAGGCTGCTTCTGATGCTTGGAAGATATCCTCTCAGCCACAAAG
28988	DBNL	6621	28.710466696874	32	NM_014063	ACAGCAGCGGCGCGGAGACTGCGGGGCGGGCC
1663	DDX11	951;951;1093	104.920084121977;109.920084121977;212.512351326624	118;123;240	NM_001257144;NM_001257145;NM_030653	GGGGGTTGTTCCGGCTGCCTTTCACTGAGGGGACCCGCCAGTTTCTAACTCAGTGGCGTTTGCCCTGATTCCCGGGGCCTGGCTTTCAGCGTAGCAATTCTGCCGGCGAAGAAGGTCC;GGGGGTTGTTCCGGCTGCCTTTCACTGAGGGGACCCGCCAGTTTCTAACTCAGTGGCGTTTGCCCTGATTCCCGGGGCCTGGCTTTCAGCGTAGCAATTCTGCCGGCGAAGAAGGAAGACTTC;GGGGGTTGTTCCGGCTGCCTTTCACTGAGGGGACCCGCCAGTTTCTAACTCAGTGGCGTTTGCCCTGATTCCCGGGGCCTGGCTTTCAGCGTAGCAATTCTGCCGGCGAAGAAGGTGAGCGCAGTGCTGTGTGGCAGCAGAGCTCCTTAGGACGAG…
9687	GREB1	5111	288.837996478184	281	NM_033090	GGGGCGGCTGAGCAGCAGTGTGTTCATGGAGAAAGAATCAAAGCGCACATCTTGTACTTTGATGCCCATAGGAAGGGCTCTCCTCTGGCCCCTCTGGCTTTGTTTGGAGCAGAAAACAACAAACTGCAGCTGAGGACAGCCACCCTTTCTTCGTCTCTGCTGAGCGAAGGCTACACGGCCCTTCCTCCTTGCAGCTGTTTCACCTTCTACCTTGCGTGGAGCCAGGCTTTTGCACCGAATCTGAGATGCCATTTTAAACAGAAGACTCCATCCTCTTGAAG
4718	NDUFC2	12690	114.046178092987	118	NM_004549	GAGTCCGGCGCGCAGAGGAGGAGGAGAAAGCTGACCGCTTAGGCCGGGGTAGTGGTCGTCGTGGTTTTCCTTGTAGTTCGTGGTCTGAGACCAGGCCTCAAGTGGAAACGGCGTCACC
3964	LGALS8	514	199.389105058366	183	NM_201544	GCCAGAGCCGGGAACCCTGACGGCACTTAGCTGCTGACAAACAACCTGCTCCGTGGAGCGCCTGAAACACCAGTCTTTGGGGCCAGTGCCTCAGTTTCAATCCAGGTAACCTTTAAATGAAACTTGCCTAAAATCTTAGGTCATACACAGAAGAGACTCCAATCGACAAGAAGCTGGAAAAGA
9554	SEC22B	6587	115.055260361318	139	NM_004892	ACCTCAGCGGGAAGCGGAGACGCAAGCAGCTGGATCTCCGGTAACTGAGACATAGGGTATAACTGTTGTCGCGGCGGAGGAAGTGAGGACGGCGCCAAGGGCCTTCCGGGCCAGTGTTGGATCCCTGTAGTTTGTGAAG
51143	DYNC1LI1	4912	33.087744299674	7	NM_016141	GACCAAG
5317	PKP1	150	170.98	197	NM_001005337	AGTGCCAGAGAGGGACGAACCAGGGTGGAAGCGCCAGGAGCAGCTGCAGGGAGCCCTCACGCGGACCACGCACTCTATGGCCGTAGGGAGCCGCTGAGAGCGAGAAGAGCACGCTCCTGCCCGCCCGCTGCACCGCACCTCGCCTCGCCTCTCTGCTCTCCTAGGCCCCGGCCGCGCGCCACCCGCCTCCCGCCACC
388650	FAM69A	54	54.592592592593	55	NM_001252269	GCCAGCGCTCGGGTCCGCCTCTGACTGCAGCGCGGCGGGGCGATGTGTGATTACC
9070	ASH2L	230;1849	314.708695652174;292.234721471065	312;293	NM_001261832;NM_001282272	ACCTTTCACGGGCGGTGGGAGCTGAGGCTCCTGTCGTTATCTCTGATCCTTGCACCCTGGCAGGAAGCTGGTAGCTCACACTTTAACGGGAGGCCTTCACATATTCCAGAAAAGAAACCACTTTGCAGTGCCAGACTGGAAGAAGTAACGGTCACTCTGAAAACAGGGTGGGAGAGCTGCCTCTCTTTGAACCTCTCCCAGGACCAACTCTAACCCAGGGAGGCAAACTTGGTCGATGTAAGCGGTGGCTTGGAGACAGAATCATCTAATGGAAAAGATACACTAGAAGGTGCTGGGGATACATCAGAGGTG;GAGAAGTCCAGGGGTGGCCGTGATGGCGGCGGCAGGAGCAGGACCTGGCCAGGAAGCGGGTGCCGGGCCTGGCCCAGGAGCGGTCG…
10263	CDK2AP2	2372	331.778246205734	326	NM_001271849	GCCGCGCCCAGGAGTTGGGGATGTCCTACAAACCCATCGCCCCTGCTCCCAGCAGCACCCCTGGCTCCAGCACCCCTGGGCCGGGCACCCCGGTCCCTACAGGTGAGGATCCAGCTCCACCCCTGCTCGCCTGCCGGGCGGTCGAGGTCTCGAAGAGAAGACGGCCTGAGTTCTGCAATACTGGGCCTGCCGCCTACCCTCGCTGAGCCTCAGTTTGCTGGCCTGTGAAGTGGGCGTGGTCACGAAGCGTCCCGTCGCCGTCGGGCTCAGTGCCAGGAGCCGGCGCTCCTTTCAGACCGCTGTTTAACGACTTTGGACCGCCTTCC
3157	HMGCS1	925	124.019459459459	120	NM_002130	GCCGGAGTCGGGTGGGTTGGCGGCTATAAAGCTGGTGGCGAAGGGGAGGCGCCGCGGACTGTCCTTTCGTGGCTCACTCCCTTTCCTCTGCTGCCGCTCGGTCACGCTTGCTCTTTCACC
9913	SUPT7L	2655	295.423352165725	170	NM_001282729	GGACCGTGACCGAGGAAACCCCTGGAGGGACTTGGGCATTCCTTGGGCTCCGTGCCTGTTCTTCGTGCTCCTTTCGGTAAAGGCAAGGATCTCACATTATCAGTCTTTGACCGACACAGAATGCCTGGCATTTGATAAATGTTTGTTGAACTTGAAGAGACATATGGACA
25800	SLC39A6	36684	189.281348816923	214	NM_012319	GAAGGCTAGGGGCGCGGCTGCCGGGTGGCTGCGCGGCGCTGCCCCCGGACCGAGGGGCAGCCAACCCAATGAAACCACCGCGTGTTCGCGCCTGGTAGAGATTTCTCGAAGACACCAGTGGGCCCGTTCCGAGCCCTCTGGACCGCCCGTGTGGAACCAAACCTGCGCGCGTGGCCGGGCCGTGGGACAACGAGGCCGCGGAGACGAAGGCGCA
65084	TMEM135	619	124.828756058158	73	NM_001168724	GGCTGGGCTCTCGCGCCCCTCCCTGCAGGGCTCAGGCTCTCCCCCTCCTGTCTTCTCCGCGCTGTTCCTCGTC
79415	C17orf62	153;153;73;153;153;153	77;294;233.972602739726;77;297;127	77;294;234;77;297;127	NM_001033046;NM_001193657;NM_001193655;NM_001100408;NM_001193654;NM_001100407	GCGTCTCTCTGCTGCGGCGCGGGGACCGCTGTGCTCTCGACCCCTCCTCCTGTAGAGAGTGGTGCTGCCCTCTCGGG;GCGTCTCTCTGCTGCGGCGCGGGGACCGCTGTGCTCTCGGTAGGCGGCTGGGCTGGGTGGGCTCCGCACTTCCTTCCCGCTCCGTGCCGCGCGTCCCGGCACCCTTAGGCCCACTCCGGGAGGGGTCTGCGTCCTGGGCCCGCCTGCCGGCTGTTCCGTGTCCCGCCGTGCCCGTCGCGGGCGGCCTCGCGCCTGTTCCGCTGCAGGAAACGGGGTCTCTGGGGGATCCAGTGACGTGCCCAACCACAGAGACCAGACCCCTCCTCCTGTAGAGAGTGGTGCTGCCCTCTCGGG;CTGCTGGGGGCTAGCGGCCTCAGGAC…
813	CALU	3376;3376;3345	90.999703791469;90.999703791469;882.027503736921	73;73;864	NM_001130674;NM_001199673;NM_001199671	GAGCTGAGCCGGTGGGTGAGCGGCGGCCACGGCATCCTGTGCTGTGGGGGCTACGAGGAAAGATCTAATTATC;GAGCTGAGCCGGTGGGTGAGCGGCGGCCACGGCATCCTGTGCTGTGGGGGCTACGAGGAAAGATCTAATTATC;GAGCTGAGCCGGTGGGTGAGCGGCGGCCACGGCATCCTGTGCTGTGGGGGCTACGAGGAAAGGACCTCCCACCCTCCCCCACTGAGCTGCCTTCCCAGTGATGAAAGAAAAAATGTAAAAGCCTGAAAACCCTTCTTCTTGATTTTTAATTTTTTTTTTTCCCTCTAAGACCTTAACCACTCTGGATAGTATCACGGGGTATCAGTAGAGTGTGCTAAACAGATGTGTACTCTGCAGCTTCTTTGCAGGTT…
9463	PICK1	867	201.557093425606	156	NM_012407	GGTGAGCGACAGAGGCAGCTCCCCAGGGCCTGGAGACCCGTGGGGCGGACTCTGGGATCTGAGCCTATCGCCCTGGCCTGGAGCCCCCCTTTGTACCTATTCCCCATTCCCCTACCGAGCTGGGCAGTTAGCCAGCCCACTCCAACTCTCGGAACC
10342	TFG	1224;807	315.073529411765;115.588599752169	403;113	NM_001195479;NM_001007565	GGGACTCTTCGGCCTAGGCAGCCGGGACCCAGCCAGCCCTGCGCCTCGCGCCGTCGCGCATGCGTCCTGGGTATGTCCACGCGCAATAAGGAGGGGCGAAAGGACATTTTTTTTTTTCTTGCTCCCGCCTCTGTTCTTCCCCCACCTGCCACGTACAGAGCCCAAGTTCTCGCTAGGCTTGTTGGGTCAGCGCGATTGGCCGGGGCCCGCGCGAGCCTGCGAGCGAGGTGCGGCGGTCGCGAAGGGCAACCGAGGGGGCCGTGACCACCGCCTCCCCGCGACGCCCCAGTCCAGTGGCCTCGCGTCCGCCCATTCAGCGGAGACCTGCGGAGAGGCGGCGGCCGCGGCCTCCGCAAGCCGTCTTTCTCTAGAGTTGTATATATAGAACATCCTGGAGTC…
7050	TGIF1	2178	308.161157024793	313	NM_003244	GACAGCGCCGAGGTGCGCCGAGCAGGAGCAGGGAACAAAGGAGCGGAGAGGGGAGGGGAGAGAGTTGGGCGAGGGAGAGCCCCCGGCCGGCTGCCAGAAGATCCCGGCGGGAGGAAGCCCAAGTGTCACTTGAATTCCACCCAAGGAGCGGGCGCCTGGGATCAGAGCGTCCTGTTTAGCAATAACGGCTGGAGCACGTCCTACAAGTTACGGGAGAGTCGGCTGTGAAGGAGACGTTCGCTTATCCCCTGTGTCCCCGCTCCTGGCCCCTCCAGACCCCCGCCTTGCCTCGCGCTGGGAGGGGAGATCCAGA
9641	IKBKE	1199	375.136780650542	368	NM_001193322	GAGAGAGCTGAGAGCCAGGACTCAGTGCTGAGCTTGGTGTCCCACCGCCACAAGGAGGCAGGGAAGAAACCCACTAGTCCCAGCTCCTGGGGTGGCACAGACATTGCAACTGGCCCTGCCTGTGGGTCCTAGGGGCCCTTGGCTACCAGGAGGCTAAGAACACTGCTCATGAATGACAGTGAGCCCTGAAAGCTCTGGGGGTGTCACCCAGTCCCACAAGCCTGCATCCCCTGCAGTGGAGATGGGCTCAGCTCCTGGACGTGCCACAGACAGAAAGCATAACATACACTCGCCAGGAAGAGCCTTTGCCTGACTCAGGGCAGCTCAGAGTGTGGGGCAGAAGGTGACCAGCCAGCTCAGGGCAGGAG
10313	RTN3	5282	134.241953805377	167	NM_001265591	GCCCTCTAGCTGCGCTCGGCTGAGTCAGTCAGTCTGTCGGAGTCTGTCCTCGGAGCAGGCGGAGTAAAGGGACTTGAGCGAGCCAGTTGCCGGATTATTCTATTTCCCCTCCCTCTCTCCCGCCCCGTATCTCTTTTCACCCTTCTCCCACCCTCGCTCGCGTAGCC
56954	NIT2	85	55.1294117647059	74	NM_020202	ACCGTAGCGACGCCGCGGTCCGCCGGATCTCCAGCGCTCAGTCCGCGCCGCAGGTGGTGCTTGTCTGCAGAGTC
84888	SPPL2A	58	88.637931034483	25	NM_032802	GTCCCACCCGGCACCCACCAGTCCG
79612	NAA16	115	337.165217391304	391	NM_001110798	GCAGCACAAGGCAAATCCACGCGGTTGGTCCCCGCTACGCCCCCGTAGTCACCCGCAGCCCCTCGCCAAAGGGCGCTCCGCGCATGCGCACAGGATCCGGCTCGGGAGGCGGACCCTGGCTGCCATCTTGCAGTGCGCGGGAACCGCCGCCGCCGCCGCTGGCCAAAAAGCGGAGCCCAGGGGAAGCGTGTCCTGCTCAGACCGCCTTCCTTCTCCATTGCCACCCGTGCCGAACAGCCAGGCTGCCCAATTGCAACTGTAGACCAATGAACTAATCCATCGCCCGCAGCCCGACTCTCAGCAGCGGTTCGTCCCGGTGCCCACCCCCGCGAAGCGGAGCGCCCGGGCACCTAGCCTCCCTGCCGGCCACCTAGCCTCCCTGCCGGCCACG
823	CAPN1	1358	89.624447717231	97	NM_005186	GGGGAGGAGCGCTCTTCCTGGTTGGGCCCTGCCCTGAGCTGCCACCGGGAAGCCAGCCTCAGGGACTGCAGCGACCCCCAAACACCCCTCCCCCAGG
5349	FXYD3	1218;1218;1218;1218;1218;1189;1218	93.906403940887;177.906403940887;177.906403940887;93.906403940887;177.906403940887;128.952901597982;93.906403940887	56;140;140;56;140;91;56	NM_001136008;NM_021910;NM_001136009;NM_005971;NM_001136011;NM_001136007;NM_001136012	GATTTCTCCCGGAACCTCTGCTCAGCCTGGTGAACCACACAGGCCAGCGCTCTGAC;GATTTCTCCCGGAACCTCTGCTCAGCCTGGTGAACCACACAGGCCCGAGTTTCACCCAGTCCCCACTCCACGGTGCAGCTGCGGCTTATCTCTCAGCCCAGCGAGATGCCAGCCTTCCTGTCCCGGGCCAGCGCTCTGAC;GATTTCTCCCGGAACCTCTGCTCAGCCTGGTGAACCACACAGGCCCGAGTTTCACCCAGTCCCCACTCCACGGTGCAGCTGCGGCTTATCTCTCAGCCCAGCGAGATGCCAGCCTTCCTGTCCCGGGCCAGCGCTCTGAC;GATTTCTCCCGGAACCTCTGCTCAGCCTGGTGAACCACACAGGCCAGCGCTCTGAC;GAT…
116039	OSR2	2926;2506	435.968215994532;379.953312051077	496;382	NM_001142462;NM_001286841	AGCCTGGGGAGGGACGCGGGCGGGGACGGAGCTCGGCGTGCTTGCTGCTGGAGGGTGATGGCCCTGCAAGGCTGTGGGCTCCGACCTCACCGGGAGTCGACAGCGAGAGGTTCGCCGAAGAGCGAGGTTCTGGGCGAGCGCTGAACGCCGGCCCCAAGCACCCCGGGTCTTTACACAGTCCGCGTCCACAGACTCTGACGAAGACGTGGATCTGCTCTCGCTTTAGCTGCTCGCGGTCCTCCAGATCATGTCCGCGACTCCTGCGACTCCGCGCGGAAAAAAAAGTTTGCCAGGCGTGGACTCAATGACCTTTCCAAGCTGTGCGCCTCGCTGCCTGGACCGGGTCTGAGCGCGGCTGCCCAGGTTGACCTTTCTGCGGGAGGGCTTTCTCTACGTGCT…
7555	CNBP	7462	147.997989815063	137	NM_001127193	GTGTGCAGACCCGCGTGTGGCGCAGGCAAGGACCCTCAAAATAAACAGCCTCTACCTTGCGAGCCGTCTTCCCCAGGCCTGCGTCCGAGTCTCCGCCGCTGCGGGCCCGCTCCGACGCGGAAGATCTGACTGCAGCC
79642	ARSJ	101	721.168316831683	541	NM_024590	GGCCGGTCCACTACGGCAGTTTATCTGTCTGATCAGAGCCAGACGCGACGCGTCCACTTCGCAGTTCTTTCCAGGTGTGGGGACCGCAGGACAGACGGCCGATCCCGCCGCCCTCCGTACCAGCACTCCCAGGAGAGTCAGCCTCGCTCCCCAACGTCGAGGGCGCTCTGGCCACGAAAAGTTCCTGTCCACTGTGATTCTCAATTCCTTGCTTGGTTTTTTTCTCCAGAGAACTTTTGGGTGGAGATATTAACTTTTTTCTTTTTTTTTTCCTTGGTGGAAGCTGCTCTAGGGAGGGGGGAGGAGGAGGAGAAAGTGAAATGTGCTGGAGAAGAGCGAGCCCTCCTTGTTCTTCCGGAGTCCCATCCATTAAGCCATCACTTCTGGAAGATTAAAGTT…
7164	TPD52L1	30362;30362;405;30362	110.796456096436;110.796456096436;236.069135802469;110.796456096436	112;112;213;112	NM_003287;NM_001300994;NM_001003395;NM_001003397	AGGAGTGGGAGCGAGCGGCGGGGCCAGCTGCGTTCTGAGCCTGGGCGCAGCTGCCATCTGCTCTGGGAAGCACCAGGGTGTCCCCGCCGCCCTCAGCTCGAAGTCAGCCACC;AGGAGTGGGAGCGAGCGGCGGGGCCAGCTGCGTTCTGAGCCTGGGCGCAGCTGCCATCTGCTCTGGGAAGCACCAGGGTGTCCCCGCCGCCCTCAGCTCGAAGTCAGCCACC;GTGGCTCCCAAGTTAGGGAGTGAGAGGATCGCCCGCCGAGGGGGTGGCTCCGCAGCCCGGCTGCGCGAGACGCTTCCCGCTCGGGGACCCGCCTTCCGAGGCCAGGTGAACGTTACCGGCCCCCTGACCTCCAGCAGATCCACACGTTTGTTGGAGACTGAACCGTTGCAAGG…
4723	NDUFV1	3996	75.204954954955	47	NM_007103	AGTGCTATGAAGGTGACAGCGTGAGGTGACCCATCTGGCCCGCCGCG
79649	MAP7D3	4293	27.835313300722	22	NM_024597	ACCGCCTCCGGTCCCGACTCCG
3949	LDLR	1775	82.214084507042	97	NM_001195798	GTGGGCCCCGAGTGCAATCGCGGGAAGCCAGGGTTTCCAGCTAGGACACAGCAGGTCGTGATCCGGGTCGGGACACTGCCTGGCAGAGGCTGCGAGC
2934	GSN	53;53;53;53;53;53	239.679245283019;189.679245283019;160.679245283019;234.679245283019;198.679245283019;164.679245283019	239;189;160;234;198;164	NM_001127664;NM_001127667;NM_198252;NM_001127665;NM_001127666;NM_001127663	GGAACCAGCTGAGCGCAGCTGGACCCAGCAGCCGCTGTCTCCAGTGCCGCAGCAGCAGGTAGTGCTCATAGCTCTCTTTGTCCAGTGCTTCGGCCTTGGTCCCAGCGCCTTCCCACGGAGCAGCACTCTTCACCCTGCACAGCCTTGTTAGGCCTTGGTTGCTATTCTGTAGAAGAGCAGAGTCCCCATAAAGAGGAGGTGCAGGAATTCTTCCCAGAGGCTTTGGAGAGCCCAACAGC;GGAACCAGCTGAGCGCAGCTGGACCCAGCAGCCGCTGTCTCCAGTGCCGCAGCAGCAGGTAGTGCTCATAGCTCTCTTTGTCCAGTGCTTCGGCCTTGGTCCCAGCGCCTTCCCACGGAGCAGCACTCTTCACCCTGCACAGCCTTGTTAGATACAGCG…
23767	FLRT3	793	457.239596469105	455	NM_198391	GTGCAGTAAACTGGAATGCTCTCCCTCGCTCACTCCTCAGTGTAGGAGTGATCTGAAGCAGGACAAGCTCAGCCTGCAGCTGCCGTGGGCTTTGTGTGGACTGGACGCAGAGCTTGGGAGACGGGGGAGGGCTATTACTCCAATTCACTGTCAATGGAATTACAGCTATAGCGGCAGTGTATATAGGATTGCTTTTTCTCGTCTTCCTGGAGATGCTCAGTCCCAGTATATTTTAAGGAAGAGAAATATAAAGGAAATTTAGTATGCCTCCTTTTCTTTAAATGAAGAATTTAGTTTCCTTTACTTCTTAAAAGAGAATACCTGTTCTTGTATAACGTGACTGCACCAGACATTCTGAAAAATCAGCAAGAAGCAAAAGCTGGAAATAGCTATTTCACA…
1936	EEF1D	2155;11293;1936	517.063573085847;72.796068360932;82.235537190083	542;73;80	NM_001130057;NM_001195203;NM_001130053	CCCTTTCATCAGTCTTCCCGCGTCCGCCGATTCCTCCTCCTTGGTCGCCGCGTCCTTGGCTGGCGTGTGAGTACCGCGGCCCCCGCCGGAAGGAGTCGGGCGCGACAGAGACGCCCGAGGGGCCGGGAGGGCGGGCGGCCCGGGCTGCGCCAGAAGCTCGCGCCGTTAGGGACTGAGGCACAAGTGCGCCAGCGCGGGCTTAGGGGCCGTGGGCCAAGTGCGGCACTTGGGGCGAGCGCAGAGAGGCGGGGCGACGGAGGCCACGTGGCCGGCTTGGAGGGCGTCCGCGGGACGGGGGCGCCGGGAGCACTGTCTCACGGCGCATCCCGGTCGTGGAAGCCCCTCGGCCAGGCTGCTGGGGCCTAAGGCCTGTGTTTGCTGCCGTCTCCGTGGGAGACC…
54662	TBC1D13	690	63.247826086957	62	NM_001286772	GGCAGCGCAGGCGGCAGAGGCGCAGGCGGCGGAGGCGGCTGGGGGGTCCGGAAGTCAACACC
57669	EPB41L5	3973	144.138686131387	143	NM_001184937	GGTCCTCCGGGGATTAGAGCCGGTGGGCTCGTTGTGGGCGCCATTTCTCGGCGTCTACCGAGGAGCCGCCCCTTTCTCAGCCTTGCTCGGCTCTTCCCCGCTCTGGTCGCCGGGGCTGCGCCGTCCCCAGCTCAGTGACAAAA
55862	ECHDC1	571	243.912434325744	276	NM_001002030	GTGACACGAGGGAGCGCGAAGCGGAGGGCGCCTCGCGGCAGGAGCGGGATTTCCGGGGTCACGGGAACCGGCAGGGGAACGGGATAAAGTTCCCGGAGAAAGGAAAGGAGAGCGTGGGATAGTAAAAGAGAAGACGCGGAGAAGAGGAGAGGACCTACAAGAACGGAGGACAGGGGCGCACGATGGTCCCGGGGGGAGCGGAAACAAAGGCACGCAAAACGGAAAAGCGTGTGTAGGGGAGCGGAAAAGGAAGTCACCACCGTGGCCTGCGACGAA
200895	DHFRL1	925	280.589189189189	251	NM_001195643	CCACTTTCATTCTCACGTTTCCTCTTCAATTTCTCGCGAGATACTGATTTGCTCGCGCTATAGAATTCTTGTCGAAGAGGCTTAGCTCCCGCGGGAGATTTCGTGCGCAGTTACTTCCGGTAGCTGGTAAAGGCTGATACTTCCCAGGACGCGGAGGCACGTAAAAAAATTTGAAGAAGGGAATTTCGCGGCATTCTTGGCCTGGCTTCCTGGCGTAGCCAGCAAGTTCGGAGGTGTTAACCGCTGCTGTC
26574	AATF	4108	138.046494644596	153	NM_012138	GGTCCAGAGCTGTGGGGTGGCCTCCGCGCGGTCTCTGGCGGAGTCGGGGAATCGGATCAAGGCGAGAGGATCCGGCAGGGAAGGAGCTTCGGGGCCGGGGGTTGGGCCGCACATTTACGTGCGCGAAGCGGAGTGGACCGGGAGCTGGTGACG
6133	RPL9	2983	19.811934294335	13	NM_000661	GTCTACTGCGAGA
7697	ZNF138	462	142.885281385281	141	NM_001271640	GTCTCGCTGCAGCGGGTGCTGCAGGTCTGGCCTTCACTTTTCTGCGTCCTCTTACTCCTAGAGGCCCAGCCTCTGTGGCGCTGTGATCTGGTTATTGGGAGATTCACAGCTAAGACGCCAGGATCCCCCGGAAGCCTAGAA
3274	HRH2	144	613	613	NM_001131055	GCTGCATCCCTGCCCGGAGCGCAGCCGGCGCGGGCGCGGGACCGAGGCGAACCGGGTGCGGAGCCAATACCCGCGGCAGCAGCACCAGCTCCTGCCCTCCACTGACTCCAGAGAGGGAGATCCCCAGTACTTGACTCCATCACGCAGATGGGAGCAGGCACCAGCTATGGAGAGGGATACAGCTGCGTCTCCACATGACCCATCCTGCATGACACCAAAGCCACCGCCAGACAGTGCCTCGGATTCTATGCAAAACCTGGGAAGCGGAGACCTACCCCAGCCCCGGGAGGAAGCTAGCTCTTCAGGGGACCGTCTGAGGACTGGAGTTTGATCCATGAACCTGGCTTCGAGGCCTTGCTTTTCTCTCTTCTTCATTCATATTCATTCCCAACACCTTAG…
64422	ATG3	1089	164.050505050505	116	NM_022488	GCCAGCCGGGTGCTGATGCGAGTCGGTGGCAGCGAGGACATTTTCTGACTCCCTGGCCCCTGACACGGCTGCACTTTCCATCCCGTCGCGGGGCCGGCCGCTACTCCGGCCCCAGG
23247	KIAA0556	419	41.2243436754177	27	NM_015202	GAGCTCCCGGAACCGCCGCCTCTAGGG
30968	STOML2	853	45.32590855803	34	NM_013442	TCGTTGGTTCCGGAGGTCGCTGCGGCGGTGGGAA
3092	HIP1	52	24.634615384615	21	NM_005338	GACTCGGCTCCTCGCGGCGAC
4714	NDUFB8	1893	28.16059165346	28	NM_005004	GCAGAAGGGAAACGTGAAGAAGGTGAAG
4835	NQO2	1474	235.332428765265	200	NM_001290222	GTCAGCGAGTGCGCGGTCCAGTGCGGCCGGAACCTGGCGCAACTCCTAGAGCGGTCCTTGGGGAGACGCGGGTCCCAGTCCTGCGGCTCCTACTGGGGAGTGCGCTGGTCGGAAGATTGCTGGACTCGCTGAAGAGAGACTACGCAGGAAAGCCCCAGCCACCCATCAAATCAGAGAGAAGGAATCCACCTTCTTACGCT
84923	FAM104A	490	15.179591836735	12	NM_001289411	GGCGGCAGCGAC
22932	POMZP3	244	110.77868852459	70	NM_152992	GGGGGTACTTCCCACAGTGTGCTGGAATGGTTATCACAAGAAGGCTGTGCTGTCCCCTCGCAACTCCAGG
25906	ANAPC15	10395;10395;106;2967	209.882058682059;204.882058682059;92.962264150943;129.794068082238	222;217;93;133	NM_014042;NM_001278487;NM_001278493;NM_001278488	GGGAGCGGGGAAAACAAAAGGAGACGAAGGACGCATGCGTTTGGTGAGTCCCGGATTCTGGTGGGTTCTTCCGCTCAGGCTGGGTGAAGCGCTTCCGGGTCGCCGCCGGCAGCAGCCTCCCGGCGCGATGAAGACACTGAGGCTCAGAGAGGTTAAGTGACTCAGCCAAGGTCAAACAGCTAGTAAGTGGTGGAGCCAGGACTCAAAGCCAGTCTAGGAGCC;GGGAGCGGGGAAAACAAAAGGAGACGAAGGACGCATGCGTTTGGTGAGTCCCGGATTCTGGTGGGTTCTTCCGCTCAGGCTGGGTGAAGCGCTTCCGGGTCGCCGCCGGCAGCAGCCTCCCGGCGCGATGAAGACACTGAGGCTCAGAGAGGTTAAGTGACTCAGCCAAGGTCAAA…
27101	CACYBP	3003	120.773892773893	130	NM_014412	GTGGGCGCAGGCTGCAGCGCCGCGACTCGTGCGGGTAGGCGTCTGCGCTCGGTTTGAGGGCTCGGCGCGGGGTTTCCTGTTCCTCCTTCTGCGCGGCTGCAGCTCGGGACTTCGGCCTGACCCAGCCCCC
130340	AP1S3	386	114.756476683938	107	NM_001039569	GCCGGGCGCCTCACCTGTCAGCCGCACCGGCTCCAGCGCTCGCCTCTCGCCCTCGCTTCTCCAGCGCTCCTTGCTCGCAAGGCGGGGGAGGCGGCGGCCCAGCCACG
26996	GPR160	218	405.582568807339	407	NM_014373	GCCCCTCCCTCGGGCGGTCACCTGGGCACGGGCGCTGCAGGTGTCGGGGCCTCAACCTTGCGGAGCCGACAGCCATCGATCCTCGGGTGGCCTCGAGGTGGTGGCAGGGCCGCCCCCTGCAGTCCGGAGACGAACGCACGGACCGGGCCTCCGGAGGCAGGTTCGGCTGGAAGGAACCGCTCTCGCTTCGTCCTACACTTGCGCAAATGTCTCCGAGCTTACTCACATAGCATATTGGTATATCAAAATGAAATGCAAGGAACCAAAAATAACATAATTGAAGGCAGTAAAAGTGAAATTAAATAGGAAGATCATCAGTCAAGGAAGACCCACTGGAGAGGACAGAAAATGAAGCAGTGTTTTATCATGTGTATTTCAGCAGGTCTTCTTGAAATTTAA…
3189	HNRNPH3	8647	157.662773216144	144	NM_021644	GTCACCGCTGGAGACGGTTGGGAGAACCGTTGTGGCGAGCGCTACACGAGGCAAACGACTTCTCCCTTCTTTGAACTGGACCCCGCGAGCACCAGAGTCGGCGTAACTATCGCCTGACAGGCATTTAAATCAAACGGTATTGAG
333932	HIST2H3A	401	49.7780548628429	47	NM_001005464	GTTTTTCTCCCCGCCGCTGCGCTGGTAAGCCTGTGTTTTGGTTCGCT
51538	ZCCHC17	982	243.131364562118	250	NM_001282568	GACTGGGGTCGGCGTTTAGTTCAGCGCAGCGACTCGGGGACCTGGAGCTGACGCCTAGTACGTATGAGGAAGAACGGGGTGGGTGGCTGCCTGAGTCTGGAGGCGACGCCTCGGTTGTGCAGTCTGAACCTGCCCTTCTCAGCTGAGGGTGCTGACAGCAAGGGGTGGGAGGCGGGCCCCGAGTCCCCAGCTGTGGACACTTGTATTAGCTTTAATAGAAGAGAAATGGAGGAGCCATAGAATATTAAGG
7182	NR2C2	427	388.59718969555	395	NM_001291694	GGCGGCGAGGCTGGCGCTGGGAAGAGGAAGAAGAACATTCGCCCTCCTCCTACCAGCGCGCGGGCGGCGGCGGCGGCGGCACCGGGGTCACGAACTCTGACCTTTCACTGACAAAAACAATAACAAACCCCCCCTTCTCCGCGACCCCGGCGGCGCCCCCGGGCCCGTCCCCGCCACCCCGCTCCCACCTCGGCGTCTCGTCTCTCGCCCGCTGCCCCGCGAGCCCGCGGCCCCCGGGCTCCCGCCATCCGCCGACACCGGGAGCCCGGGCTCCCCGCGCCCTGCCCTCCGCGCCGGGGGCCGCCCGCCGCAGACACGGGACCCGCTTCGAGGCCGCTTTGGCGCCAAATCCTGAGGTAACACGTACACAGACCTCTCGGCCGGAATCTCCAGGG
9883	POM121	442	212.095022624434	254	NM_001257190	GGATAACGGGAGGTGAATTTCCATGTCAACATAGTCCAGCCCTTCACATCCTCAGCCGAAGATCTCACTTCCTCCCAGAGGCCTTTGCTGACTGACCCCTCAGGGATTGTGGGACTTTACCAAATCGGTTTGTAATAACACCTAGAAGACGCTATCCGATCCATCAGGCCCAGTATTCCTGTCTGGGGGTACTTCCCACCGTGTGCTGGAATGGTTATCACAAGAAGGCTGTGCTGTCCCCTCGCAACTCCAGG
10772	SRSF10	28533	76.219710510637	72	NM_001300937	GAGGCTCGGCCGCCTGAGCCGCGGACGGTTTGCTGAGCCCGTTAGTGCGCCCGGCCGAGACACGCCGCCGCC
2040	STOM	956	50.966527196653	55	NM_004099	GGCGGCTCCGGGTTTGGCAACGAGGACGGGGGAGTGCGACTGCGTCTCGGGCAGC
262	AMD1	50;555;555	248.16;317.455855855856;317.455855855856	242;321;321	NM_001287215;NM_001634;NM_001287216	GCGTTCCCCCAAGAGACTAGACCCCACAAACTCCTCCTCCACCGCGGTCCCAACTCGAGTCCCCCCGCCGTCTCCGAGCACTCGGAGGGCGCCCCTCTGGGACGGGACCGACGCCTCGGACCGGGCTGCGCCGCGGGAGTTCGAGATCTGAGTGGGACATACTTTTGAAGGATGTGCAATGTTCAATCATAAGTGTGACAAAAACTGACAAGCAGGAAGCTTATGTACTCAGTGAGAGTAGC;GCTTACACAGTATGGCCGGCGACATTAGCTAGCGCTCGCTCTACTCTCTCTAACGGGAAAGCAGCGGAATACAAGAGACTGAACTGTATCTGCCTCTATTTCCAAAAGACTCACGTTCAACTTTCGCTCACACAAAGCCGGGAAAATTTTATTAGT…
1382	CRABP2	7763	127.036583794925	137	NM_001878	AGCTTTGGGGTTGTCCCTGGACTTGTCTTGGTTCCAGAACCTGACGACCCGGCGACGGCGACGTCTCTTTTGACTAAAAGACAGTGTCCAGTGCTCCAGCCTAGGAGTCTACGGGGACCGCCTCCCGCGCCGCCACC
10902	BRD8	1640	32.976829268293	47	NM_006696	GCCCTTCCAGACCGTCTCTCCTCAGGGTTGGAGACTTCGGGGCCAAG
7515	XRCC1	1974	60.862208713273	34	NM_006297	ATCCTTCTGGCCAGGCGAAGCCCACGACGTTGAC
5927	KDM5A	63	226.460317460317	211	NM_001042603	GGAAAAGTCCTGAACCTCAGTGGAAAAGCCTTGCAAGAAACAATAACAAACGGGAGGAGGAAGCGATTCTGGGGTTTCTGTGTTGAACGGTTCTTGTCCGCGAAGATGCGCTTCGGCCTCTGTCAGGGGACTTGAACGGGCTTAGTGGGCTTCAGCCAGCTTTTCTCCACCGGTTCCCCACGGGGACCCCCCCCCCCCCCCGGCCGTTGCA
5870	RAB6A	1832	200.363537117904	81	NM_198896	GCCTTTTTCGTCAGCTGGCTGGAGCAGCATCGGTCCGGGAGGTCTCTAGGCTGAGGCGGCGGCCGCTCCTCTAGTTCCACA
22926	ATF6	1663	41.903187011425	5	NM_007348	GTGAA
119504	ANAPC16	3656	134.447757111597	143	NM_173473	GCCGCTGGCTCCGTCTGTTGGGGGGCGAACACGCCGCGGTCCTCGTCGTGGTGAGCGCAGCCACTCAGGCTGGTCCTGGGGGTGGGGCTGTAGGGGAAAGTGCTAAAGCCGCTGAGTGAAGTAAGAACTCTGCTAGAGAGGAA
26579	MYEOV	87	824.896551724138	819	NM_001293294	CTCCTGTTACTGTCCCGCGAACCCACATCCCTACAAAGCAGGAAAGTATGCTTGGGAGAGGCCAAGTGAGTGGGGAATCAGCCCAAAGCCAGGCGTCCAGGGTCTCCCTCACCTGAAGCTGACTTTTTCCCCACCTTGGACAGAGGGCGGGAGATGCCATCCCCACTGAACCCAGTGCTTTCACCAGCCATATTAGCTCCCACTCACCCCCCGTCGTGGAAGCCTCGGCCGTCACACCTGCAGGGCCGGGGCGTGCATGGCCTCAGGGATGGCCTGTTCAGCTGCTGGGTGACTCGGGTCCAGGTGCCTCACCACCTGCTGAGCTCTGTGTGATTTCTGGACACTTCTGCTCGTTGCCTTTGGGCTCAGTGAAGAGTCTGGAGTTTATCTGGAGTGAGG…
3939	LDHA	3782	105.611316763617	96	NM_001165415	GCTGCAGCCGCTGCCGCCGATTCCGGATCTCATTGCCACGCGCCCCCGACGACCGCCCGACGTGCATTCCCGATTCCTTTTGGTTCCAAGTCCAAT
123169	LEO1	7512	28.841453674121	25	NM_138792	GAGGCAGCAGCGGACGTGAGCGATA
84265	POLR3GL	467	115.824411134904	109	NM_032305	GACTTGAGGAAGCCCAGTACATTTCAAGTTGGTCGCGGCTTGGGCTCCGCTTTGGGGAGGGGCAGCAGGTTTATTCACTGGATCTCTGAATACCCAGGCCCCCTCCACC
4582	MUC1	10862	72.7519793776468	66	NM_001044391	ACCTCTCAAGCAGCCAGCGCCTGCCTGAATCTGTTCTGCCCCCTCCCCACCCATTTCACCACCACC
5828	PEX2	85;85;85;85	263.141176470588;231.141176470588;121.141176470588;263.141176470588	267;235;125;267	NM_000318;NM_001079867;NM_001172087;NM_001172086	GAGTTCCGGAAGCCTTGGTAATCCAGATTCGGCTAGGAAAAGACAAGCTTTCCAGAGAATGTTTCAGAGAAAGTTACGTGGAGCGTGGGCGTTTCGCAGACTCCTAAGTGGTCTGGAACCTAACCTGCAGTGTCTCTGAGCTTCTGGCAAGTATGAGGCAAGGATTTCACAGAAGAACTTGGAGCAAAAATTCCCACTGTCATAGCTATAGGCTGTCCAGTCTTGAGGGAGCTGCAGGAACAGGAAAAAGAGACCTTCAGAGAAGAC;GAGTTCCGGAAGCCTTGGTAATCCAGATTCGGCTAGGAAAAGACAAGCTTTCCAGAGAATGTTTCAGAGAAAGTTACGTGGAGCGTGGGCGTTTCGCAGACTCCTAAGCTTCTGGCAAGTATGAGGCAAGG…
151613	TTC14	329	79.58358662614	69	NM_133462	GGCTCAAGTAGCGGACACGGAACAGGGAACTATCAGCCCGTCGGCCTCCGGGCCCTGCATTCTCTAGCC
54801	HAUS6	1893	266.467511885895	287	NM_001270890	GGACGCCTGGCGGCGCCGGCGCACACTGCTCTTCCTTAAGGGCGGGAGTCTCGGTTTGTGGTGGCTTCGCTGAGGCAGTGGTGGCCGCACTATACCGTTAGAAACTCAATTTCCCGGAGGTTGTGAGGCCCTTTGAGGCGAAATCGCTCTGGGCGTGAAAGGAGCAGGCGTTGGCAATGGAAGGACCACCGCGACCTCAGGCTGACCGTAGGGAGGGATCTTGAGGGCCCTCCGAGTCCCCTGGGCTTGCGCTTTCTTTCTTTGCAGCCACCGTGCCTACCGCGAGG
3148	HMGB2	3268	152.011933904529	166	NM_001130688	GCAAAACAAGAGGCTGAGGATTGCGTTAGAGATAAACCAGTTCACGCCGGAGCCCCGTGAGGGAAGCGTCTCCGTTGGGTCCGGCCGCTCTGCGGGACTCTGAGGAAAAGCTCGCACCAGGCAAGAATACCCTCCAATACCCTCGGGTGGACGCGGATCTGTCAAC
7421	VDR	110	383.327272727273	382	NM_001017536	AGCGGAGCCGTGTGCGCCGGGAGCGCGGAACAGCTTGTCCACCCGCCGGCCGGACCAGGTGCGAACCCGGGAGCAGCGGGAAAGGGGGTCTCAGGATAGGGACTCGGGGTCGGGGCGTCTGGGATACCGGGGCCTGAGCGCCCGGCTGCGAGCATTAGAGTCTAAGTCTCAGCGGTAAACTTGGCTACTGAGGTCCGGGCTGTCGTGCCATGAGGCTGGGACACTAAGGGGCACTGAGGTTTGAGAAAGCTGAAGTTCGTGCCAGGCTGGCGAGGGGAGCAGCGACATCCTCGGCGCTTAGGAGAAATGCTCCGCTAACACAGTGCTTAGCACTTGGGCAACAAGAAGTATTTGTTTCCTTCTTCTGTCGGGGCGCCTTGGC
22885	ABLIM3	469;575;575	238.328358208955;541.613913043478;541.613913043478	237;591;591	NM_014945;NM_001301028;NM_001301015	GCCAACCCGCGAGCCCGCATCATGGATGTCGAGCTCCCCTATTTCGCATTGCTAGCCCTGGAATTCGAGACCCCAGACGAGGACCAGGATTCATGAAATCAGTCGCAGGGGCCGGGGCAGGGGCCTCTGGCTCCCGACACTGGCCGAGAGGTGATGAGTGAGGTTCGAAGAACGGAAGATTTAAAAAGCAGCCGGGGCCTCCGTATTGAATGAAAGACCCAGTGCAAAGACATCACC;GCCAACCCGCGAGCCCGCATCATGGATGTCGAGCTCCCCTATTTCGCATTGCTAGCCCTGGAATTCGAGACCCCAGACGAGGACCAGGATTCATGAAATCAGTCGCAGGGGCCGGGGCAGGGGCCTCTGGCTCCCGACACTGGCCGAGAGGTGGGTTCCGG…
79990	PLEKHH3	99	272.777777777778	109	NM_024927	TCCTCCCACCTCATCTTTCCCCTGCTCGGGTCGGAGCCCCGCCAGTTCCTCCGACCCCCTACTGCTCGGCCGCGGCTGCCCGCGCCCCCATCCGCAGCTCCTCGCCCGG
10113	PREB	92	221.065217391304	243	NM_013388	GGGAGCCGCGAGACAGGTGCGCATGCGCAGTGCGCGTCTGCGAGACCGACTTGGACGGAGCCGAGCTGAGGCTCGGCTTCCTGCTGATGGTCAGGGTTTTGGCAACTCCCCGGTGTGAGAGGGGTAGGGAGTGCTCCCGGCGGCGACGGGGCCGAGTTCACCAGCCGCCGGGGCAGTAGTCGAAGGCCCGGCGCGGCATGTCCTGGGTGCCGCGGTGCGGGCAGTGAACGCGCGCCGGGCGGG
389203	SMIM20	145	105.455172413793	126	NM_001145432	CCCTCAAGGCCCGGAAGCGAAAGCCTCTCCACCTCTTCCGAGCGGGGTCACGGCCCGGCCGTCGGTAACCTGGTTTCCGAGAGTGCCGGGCGGTCGGCGGGTCAGGGCAGCCCGGGGCCTGACGCC
81853	TMEM14B	1609	144.895587321318	167	NM_001286488	GCCTTTCTCCCCGCCCTGCCGCGGCCCCGGGGCGCAGCGCGCACGCAATCGCGTTTCCGGAGAGACCTGGCTGCTGTGTCCCGCGGCTTGCGCTCCGTAGTGGACTCCGCGGGCCTTCGGCAGATGCAGGCCTGGGGTAGTCTCCTTTCTGGACTGAGAAGAGAAGA
84993	UBL7	1561	371.002562459962	373	NM_001286741	GGCCGGGTTCCTTCCGCGGGACGGGTGAGGGCGCTGGGGCCCTGGGCAGCGCGGGCTCGATGTGTGTCAGCCAAGTAGCTGGTCCCACTGGAGCGGTGAGGTCGCCACCGGATAGTGTTCCTGCCCCATTACTAGCGATCTGTGACCTTGGGCCAGTGATTTTACTGAGTCTTGCTTCCCTCATCTTTAAAATGTGGCTAATGCCTGCCTTAGGGAACCGTTGTGAGGATTAAGTGAGACATGGTATATAAAACGACCTCCTTCTGGCATAAACTTGAGGTGGAAGATACCTTGAGGATGCTTGAAGGTCTGCTAGGCAGCTTCACAGCCTTTTCTTTCCTCTTCTCTATCAGAGGTCTCTTTGGAAGCAATA
11022	TDRKH	2700;2806;2806	117.871111111111;141.894868139701;141.894868139701	126;151;151	NM_001083963;NM_006862;NM_001083964	GGGGCTCACTGTGGTGGTGTGAGTGGGAGGCGGCGGCGCTGGTGGCTGCAGCTGGGGTGAGGCGCGAGGCGGCGCACTCGACGGCTGACTGGAGCAGCGGATATAAGTCAAAGAGTACAGCAGAAA;GGGGCTCACTGTGGTGGTGTGAGTGGGAGGCGGCGGCGCTGGTGGCTGCAGCTGGGGTGAGGCGCGAGGCGGCGCACTCGACGGCTGACTGGAGCAGCGGTAAAGGCGAGGATGGAGACCGAAGGATATAAGTCAAAGAGTACAGCAGAAA;GGGGCTCACTGTGGTGGTGTGAGTGGGAGGCGGCGGCGCTGGTGGCTGCAGCTGGGGTGAGGCGCGAGGCGGCGCACTCGACGGCTGACTGGAGCAGCGGTAAAGGCGAGGATGGAGACC…
66005	CHID1	122;81;122	121.196721311475;225.296296296296;121.196721311475	121;225;121	NM_001142677;NM_001142674;NM_001142676	GCCTGGGGCGGGACTTCCGGCGCGCTGGAGCGTTTTCCGGCCGTGCGTTTGTGGCCGTCCGGCCTCCCTGACATGCAGCCCTCTGGACCCCGAGGTTGGACCCTACTGTGACACACCTACC;GCCTGGGGCGGGACTTCCGGCGCGCTGGAGCGTTTTCCGGCCGTGCGTTTGTGGCCGTCCGGCCTCCCTGACATGCAGATTTCCACCCAGAAGACAGAGAAGGAGCCAGTGGTCATGGAATGGGCTGGGGTCAAAGACTGGGTGCCTGGGAGCTGAGGCAGCCACCGTTTCAGCCTGGCCAGCCCTCTGGACCCCGAGGTTGGACCCTACTGTGACACACCTACC;GCCTGGGGCGGGACTTCCGGCGCGCTGGAGCGTTTTCCGGCCGTGCGTTTG…
23029	RBM34	273	41.6410256410256	57	NM_015014	GGAACCCGGAAGTGCGAGCTGGCGCGCAGCTGCAGTCTGGGAGTCTTTGGAGTAAGA
80344	DCAF11	3964	685.264379414733	695	NM_025230	GAGATGCGTGACGAGCGAAGCGCGTGACGGAGGAGCGGTTGGCCAACGCAGTGGCGGCAGTCGGTGTAAACAAGGCCTCGCGCCGCTGCGGGTCCTGCGACCGCTCCTGGCTGGTGGGTGGTCTCGCGTGGGGCGGTTACCGCCGGCTTCAGTGGGAGGTGCTTCTCGGCTTCCTCCCCCTCATGGCGTACACACCCCCGGCGCACCACGTGGGCGTGAGGCGAGGAAGGAGGGGTGTTAGGCCAAATTCTATTTTCATTGGCTGTCACTGCTGCCGGCCTTTGTAAGGGGGCGCTCTGATTGGTCGATAAGGTGGGGGCGTCGAGGGTCTTTGAGTCCTAAGGCTTCTAATTGGTTAGATGAGATAAGCTAGTGAAGCGCTTTCTTCCGAGAGGGATT…
9399	STOML1	98	80.5	72	NM_001256674	GGGGCCGCGTAGGGCCCACTGGCCAGGGAGGGCGCCGCGCGGAGGCGCGGGGCGTGTCTCCTGTCAAAAGCC
657	BMPR1A	88	583.204545454545	586	NM_004329	GCCCCCTCCCCTCCTGGCAAGAGTCGGCGGCGGTGGCGGCGGCCGCTGCAGAGATTGGAATCCGCCTGCCGGGCTTGGCGAAGGAGAAGGGAGGAGGCAGGAGCGAGGAGGGAGGAGGGCCAAGGGCGGGCAGGAAGGCTTAGGCTCGGCGCGTCCGTCCGCGCGCGGCGAAGATCGCACGGCCCGATCGAGGGGCGACCGGGTCGGGGCCGCTGCACGCCAAGGGCGAAGGCCGATTCGGGCCCCACTTCGCCCCGGCGGCTCGCCGCGCCCACCCGCTCCGCGCCGAGGGCTGGAGGATGCGTTCCCTGGGGTCCGGACTTATGAAAATATGCATCAGTTTAATACTGTCTTGGAATTCATGAGATGGAAGCATAGGTCAAAGCTGTTTGGAGAAAA…
8693	GALNT4	711	207.528832630098	210	NM_003774	AGGGAGAGAGGAGTTGGGCTGTGCCGGAGGCCGAGGACCGAGAGGGCTCAGGTGACCCCTGGAAAGCCTGGGTGGCTGGAAAGGAGCCTAGCGCCTGCATGAAAGGAAGAACCTGCTGGGAAGTACCTGAGCTCGAGCTGTGGGTTCCGCCGCCCTTCCCCTGCGTGGTGGCTTGGTGGCCGCGTCTGCGCCTCAGCCCTGAGAATCCGG
6464	SHC1	2580	263.916279069767	267	NM_001202859	GAGTGTAATAAAGTTTCTCCAGGGAGGCAGGGCCCGGGGAGAAAGTTGGAGCGGTAACCTAAGCTGGCAGTGGCGTGATCCGGCACCAAATCGGCCCGCGGTGCGGTGCGGAGACTCCATGAGGCCCTGGACATGAACAAGCTGAGTGGAGGCGGCGGGCGCAGGACTCGGGTGGAAGGGGGCCAGCTTGGGGGCGAGGAGTGGACCCGCCACGGGAGCTTTGTCAATAAGCCCACGCGGGGCTGGCTGCATCCCAACGACAAAGTC
9053	MAP7	8405	59.288875669244	20	NM_003980	GGGCGCGTCATCGGAGCACC
84182	FAM188B	165	47.418181818182	22	NM_032222	GGGCAGAGCCAGAGCCAGAGCC
1975	EIF4B	1680	17.508333333333	23	NM_001417	GCGTTCTCTTTCCCTCTCCCAAC
10520	ZNF211	60	167.766666666667	156	NM_006385	GCAGCGGTCATTTTGGCTGCCCTCCCGGAGGTCCGTTCTGTCTGTCAGCCGCTTTGGTACGCTGCATCGGGATCGAAGTGACGGACCGTGAAGGCGCGAGAGTCAGGTCTGAGGGTCGGGGGCAGAGCCGCCCGCGAGGCCGGCCTGGGGATAGCG
9117	SEC22C	1099	133.263876251137	142	NM_032970	ACCTGCGCCTGGGCTGCCGGTGACCTGGGCCGAGCCCTCCCGGTCGGCTAAGATTGCTGAGGAGGCGGCGGGTAGCTGGCAGGCGCCGACTTCCGAAGGCCGCCGTCCGGGCGAGGTGTCCTCATGACTTCTCTTGTGGACC
214	ALCAM	155	500.81935483871	500	NM_001627	AGAGCAGCCCGGAGACCGCTGCCGCCGCTGCCGCTGCTACCACCGCTGCCACCTGAGGAGACCCGCCGCCCCCCCGTCGCCGCCTCCTGCGAGTCCTTCTTAGCACCTGGCGTTTCATGCACATTGCCACTGCCATTATTATTATCATTCCAATACAAGGAAAATAAAAGAAGATACCAGCGAAAAGAACCGCTTACACCTTTCCGAATTACTCAAGTGTCTCCTGGAAACAGAGGGTCGTTGTCCCCGGAGGAGCAGCCGAAGGGCCCGTGGGCTGGTGTTGACCGGGAGGGAGGAGGAGTTGGGGGCATTGCGTGGTGGAAAGTTGCGTGCGGCAGAGAACCGAAGGTGCAGCGCCACAGCCCAGGGGACGGTGTGTCTGGGAGAAGACGCTGCCCC…
410	ARSA	52	263.615384615385	259	NM_001085425	GCGCCCGCAGCCCGGTACCGGCTCCTCCTGGGCTCCCTCTAGCGCCTTCCCCCCGGCCCGACTCCGCTGGTCAGCGCCAAGTGACTTACGCCCCCGACCCTGAGCCCGGACCGCTAGGCGAGGAGGATCAGATCTCCGCTCGAGAATCTGAAGGTGCCCTGGTCCTGGAGGAGTTCCGTCCCAGCCCGCGGTCTCCCGGTACTGTCGGGCCCCGGCCCTCTGGAGCTTCAGGAGGCGGCCGTCAGGACCCCTCGGTCCC
896	CCND3	60	395.8	395	NM_001136017	GCCGGATGAGCCTCCTGGCCTCGCCGAGGGTGTACAGGGGGTGGGAGAGTCAGGCCGGGGACCGAAACTTGGCTGAGCAGAGCACCAGCCCCTTTGTCTCCTCCGCCCCCTCTTCCCCACTTCCTGCCCAGCTCTGGATCGGCGGCGCGGCGCGGACTTTGTAAACACTTCGCCACTGCAGGGGTGGAGACTGGCTCTGTTCGGATGCCGGCCGGGGGGGAGAGGTGCAATCCTCTCCTCGCGGCTGGTGGTTGCGACCACCCCCACTCCCCAAAGGCAGGCTCCGGAGGCGGCGGGACAGAGCGCCTGCGACCCCAGTCGGTGCTCCGGGGAGGTCACCTGACGAGGAGGTATGTGAGGAGCAGCGCTGTGAGGAGGAAGTCTTCCCCCTGGCC
7328	UBE2H	139;73	393.625899280575;236.821917808219	406;237	NM_182697;NM_001202498	CAGAGCGAGGCTGGGGTAGGGAGGCCGACTGAGCAGGAGTCGTCCGCTTATAGTGGAGGCTGCTAGGAGCCGGTCAGAGGGTGAGTGGGGAGCAGGCGAGCGAGCCACAGCAGGCAGGAGGGAGCGTCGCGCGGCGCAGAGGAGCGCCGGGGCAGGGCCGCGGCGGAACCACAGCCGGAGAGGGGCAGCCCGAGCCGGGCGCCGCAGGGTCCCCACCCCCACCCGGCCGGACAGTGCCCGGTGTTCCCCCGTGCGGGGGGCGGCGGCGGCGGCTGACGGGACCGCCGGGACCGCGGGGGTGTTGCCACCTCCACCGAGGAGCCGGCGCGGCCGCGGGCTCCTCAGAGCCGGGGCCCCGGGCCCGTGACAGACGGGCCGAGGAAGGGAGAGAGGCGGCGG…
92597	MOB1B	102	155.852941176471	135	NM_173468	ACCGAGCAGCCGGCTCTCGGCACCTCCTCCTCCGCCTCCCTGTCTCCTGTTCCATTCGCCTTTCCTCTTCTTTCCTGGCCCACGCCGCTCCGAGGCCTCGCGACCGCCGAGCCTGCAGCCTGCCCCGCGGCCAAC
3978	LIG1	8174	148.935894298997	149	NM_000234	GCGAATGCCGTGGCGCGAACTTGGGACTGCAGAGGCGCGCCTGGCGGATCTGAGTGTGTTGCCCGGGCAGCGGCGCGCGGGACCAACGCAAGGAGCAGCTGACAGACGAAGAAAAGTGCTGGACAGGAAGGGAGAATTCTGACGCCAAC
2885	GRB2	177;177	170.593220338983;170.593220338983	29;29	NM_002086;NM_203506	AGGCTGCTGAGCACTGAGCAGCGCTCAGA;AGGCTGCTGAGCACTGAGCAGCGCTCAGA
4666	NACA	2921	85.377610407395	94	NM_001113203	CCCCTCCGCTCCAGGCTTCCTTCTGCAACAGGCGTGGGTCACGCTCTCGCTCGGTCTTTCTGCCGCCATCTTGGTTCCGCGTTCCCTGCACAAA
22827	PUF60	681	13.546255506608	12	NM_001271098	GACGGACGCAAG
7248	TSC1	185	219.654054054054	213	NM_000368	GTCCAAGATGGCGGCGCCCTGTAGGCTGGAGGGACTGTGAGGTAAACAGCTGAGGGGGAGGAGACGGTGGTGACCATGAAAGACACCAGGTTGACAGCACTGGAAACTGAAGTACCAGTTGTCGCTAGAACAGTTTGGTAGTGGCCCCAATGAAGAACCTTCAGAACCTGTAGCACACGTCCTGGAGCCAGCACAGCGCCTTCGAGCGAGAGA
7311	UBA52	3124	60.024647887324	51	NM_001033930	TTCAGCGAGGCGGCCGAGCTGGTTGGTGGCGGCGGTCGTGCGGACGCAAAC
83744	ZNF484	56	226	226	NM_001007101	AGCGCTGTAAGAAGTACCTCTAGGCCTGGGAGGCATTGAGAAAAAGGAAGTGGGTCCTGTTCTGGTTCTTGCGACTATAGTCACCTCCCGAGGCAAATGACCACTGTCCTGAGAGGACGTGGGTGAGGGGCAGGAATCAGTGTCATTCAAGGACGTAACTGTAGACTTCAGTAGGGATGAGTGGCAACAATTAGACCTTGCTCAGAAAAGCCTGTACAGAGAAGTG
3163	HMOX2	1386	131.278499278499	150	NM_002134	GCCGGCCTCGCGCCAGTCCGCTGGGCTGCAGGGACTGCGGCGCCTGAGGGAGTCGCTGACGGGCACGCTGACTGGAGGCTGGCGGACAGGCGACAGCGACCTGCGGCAGGACCAGAGGAGCGAGAGCAGCAAGAACCACACCCAGCAGCA
8729	GBF1	345	252.179710144928	251	NM_001199378	GTCAGTGAGCTGACAGGGAAGGTACCCGGCTCTACTGCCCGTCCCGGACGACTCATCCTGGCGGACTGTGCAGTCCCACCCTGACTTCGGCCTCAATTTCCAGGAAACAGGCTCCTTCTCTTCTCCCATCTGCTACCAGAGCCGGGAGAGCTGCTCGGAGACGCCTCCGGGGTGCGGGCTGGACATGAGCAGCGGCTGCCGGTCCTGGGACTAGGCCCCGCCATTTTGGATCCGCTGACAGGTTTGCCAAG
5130	PCYT1A	417	177.088729016787	179	NM_005017	GCCTTCCCCGGGCGTCTCCCCGCAACCTCCTCAACTTCCCTAGTCAGTGACGCGGCGCCGGCCAGAAATCCGACCGGACCGGGCTCGGGGGAGCGTGAGTTGCAGCATGTGCCGAAGCGCCACCTCAGAAGATAAAAAGAAATGAGTCTCATATTTGGCATTCTTTTAGTTAAAAGAAG
1781	DYNC1I2	4266;4494;4266	153.236755743085;131.349354695149;153.236755743085	148;145;148	NM_001271786;NM_001271785;NM_001271790	GTAAGGCGAGGGCGGAAGTTGGATTCCTGGCCTGAGAATATTAGGCGTAGTTTTCCAGTTTTTGGCAAAGCGGAAATACTTAAGGCCCCTGGGTTGACTGGGTTCTTTGTTTTATCTACCGGCTTCTGCTTTACGACAGGTCACAAAC;GCCGCCCATCCCTCTTTGTGTGCTTTGGAAAGCCGCGGAGCTGGTGGTGGCTACAGTTGGTGTTGGGGGCTTAGGCGAGGGACGTTACCGGGAAGTTGCAGGCGGGAGGACTCTTCCCCATCCAGTCACCTGACAGGTCACAAAC;GTAAGGCGAGGGCGGAAGTTGGATTCCTGGCCTGAGAATATTAGGCGTAGTTTTCCAGTTTTTGGCAAAGCGGAAATACTTAAGGCCCCTGGGTTGACTGGGTT…
4670	HNRNPM	2556	331.226525821596	322	NM_001297418	CCAGACGCGGAGAAAATGGCGGCAGGGGTCGAAGCGGCGGCGGAGGTGGCGGCGACGGAGATCAAAATGGAGGAAGAGAGCGGCGCGCCCGGCGTGCCGAGCGGCAACGGGGCTCCGGGCCCTAAGGGTGAAGGAGAACGACCTGCTCAGAATGAGAAGAGGAAGGAGAAAAACATAAAAAGAGGAGGCAATCGCTTTGAGCCATATGCCAATCCAACTAAAAGATACAGAGCCTTCATTACAAACATACCTTTTGATGTGAAATGGCAGTCACTTAAAGACCTGGTTAAAGAAAAAGGGATGTGCTGTTGTTGAATTCAAG
9361	LONP1	59	55	55	NM_001276480	GGTCGAGAGCCTGGATGAAATCTACCACACGGGGACGTTTGCCCAGATCCATGAG
51603	METTL13	1491	225.198524480215	227	NM_014955	ATGGGCTCGGAAATCTAGTTCGGGAAAAGTGTGAGGGGCTCTTCACGTGGGGAAGGAACAGCAGGCGCGGAGGAGGGGGCAAGCGTGTGTGAGATTCAGTGGTCCATGCGTGCGTTTGTCGTGTGCTGGTGATTGGGTGTGGCAACTCAGAACTGAGTGAGCAACTGTATGATGTGGGCTATCGGGATATAGTGAACATCGACATCAGTGAGGTTGTCATCAAGCAA
7203	CCT3	37965	88.446437508231	61	NM_001008800	CTCTCCAGAAGGTTCTGCCGGTTCCCCCAGCTCTGGGTACCCGGCTCTGCATCGCGTCGCC
93643	TJAP1	243	314.382716049383	312	NM_001146016	GCGGCAAGATGGCGGCCTGAACGCAGCTGGCAGCGGCGGAAAGCTTAGATCAGCCTTTCCACAGCTGTTAGCAGCATCTGCCCCAATTTCAGCTGAAGATTCAGGTGCCCCAGGGACTGGAAGAAATTACAGTGCCTACTTGGAAAGAAGAAGAGATAGCGACTTGCCCCAGTCCAACCCCAGAGCGGGAGCTGTGGCTAAAGGAAGTGGAGGGGCCGTGGGATGCGGAGAGCCGAGGGCTAACTCCCGGACAGCGGAACAGAGAGAGCTGCCGACAAACAGACGCAGGCGGAGGAGCCGTCACCTCCCAGA
84259	DCUN1D5	451	18.370288248337	12	NM_032299	GGAGGGCGGAAG
85359	DGCR6L	329	23.705167173252	23	NM_033257	GGCGGCTAGCGGGCGTCCGCGCC
57223	SMEK2	2466	361.888077858881	334	NM_020463	GAGAAAGGCAGAGAGAGTCGGGTTACAAGATGGCGGATCTGTAGTAGTTACCGCGGCGGCGGGAGAGCAAGCGAGCCCTGGGGGGCAAAGAGACGGGAGAGTGGGTGTATGCGCGGGTGAAGTGAGAGGTAACGGGGCCTCCGGGCGGAGAGGCCTCAGTGGCTCTTGTCACCCCTTCTCGCGGCTGAACCTTTGGAGCCATGGTGAATTCGGGCCTCTCCGAAGCCGCCGCCGCCGCCACCGCCACTACTGCCTTTACCGTCTCCTAAGAGTGAGGAGCGCGGACGAGGTAAGCGAGGAGGCGGCGGCTAGAGCGGTGGAGACAGCAGCCACC
1478	CSTF2	1097	23.336371923428	24	NM_001325	ACCGGAAGCCGACTCAACAGAGCT
9924	PAN2	672	217.433035714286	217	NM_001166279	GAACTGGGGAAACTGGAATTTCCCGCGGAGCTGACAGCGCTTGCGCTCCCCCTACTCGTTCTAATTCCACGCGCTCCAAAATATCCGCCATGGAGAAATCTTGGCCAGGATGTCCATTCTAGGCCCATCGGTGCTGTCTTGCTGAAGGTTGGGTCAGGCATCTAAAGGGACTGTGGTAAGGGAGGGTGTGACACAGGTGTAAGCTGCCATCGTCATC
2733	GLE1	3471	89.211178334774	86	NM_001003722	GAAGCCTGTGTGGCCTTCCCGGCGGCTGATTCGAGGGCTTGTTTGGTCAGAAGGGGGGCGTCAGAGAAGCTGCCCCTTAGCCAACC
79053	ALG8	2824	30.071175637394	36	NM_001007027	GGATCAAGTTGGTGGGAAGCGTGCGGTGCCGCAGCA
7587	ZNF37A	534	338.387640449438	327	NM_003421	GTCGCGGGAGCCGCTTCGGGCCTTCTGGGCATGTCTGCCATATGGCTCCAGGTTTGTTTTTCTCCCCGGCACTCTGACGGGGAGGGCTCCCGGCATCTCCTGGCGTCCGGGTAGAGGACGCGGAGGATGCTGAGCTGCTGGCGCACTGCAGCACAACTAGAGATGTACGGATGCCCCCATCTTGATCTTACAGAATCAGAGGTACAGCCGCGAGAAAGGTCTAGTCAAGAACAGACAGAGTCGCTTGAGGACTCAGGAGGGTGTTTGCTGCGTTGACAACAGACTACACCCTCACAGTTTGCTCTGCTCTTCCAACACCAGTGGAAG
63943	FKBPL	324	206.373456790123	212	NM_022110	GCGCCCCTCTCCGGCTGCCCTCTCCGCGTGGGGCAAGGCTCCGAGGGCAGCATTCAGTAGCCATTTAGCTTTGGAAGGAGAGGTGATTCGAATGGCCCGGCTCCTCCTGTCACCATGCTAGGCACTTTGGCCGCGCAGGTGCTGACCTGAACCTGGTTCATCCCTTTCTGACCAAAACTGTTCACTCACCGTGGAAGGGACTAAGCATCCAT
3914	LAMB3	423	433.952718676123	432	NM_001017402	CTCTCTCTTGGGGCTGGAACTAGGTCTTGGCCCTTTCTACAGCTTTTCTCCTGCAAAGGGTCCAGCCTTTTCCTGCTCCCCACGTTGTCCTTACGGCTGTGTGGGGTAGGGCAGGGTCCACACTCCTTCCCATCCATTTTAGAGGAGGAAGCTGGAGTCTGGGAAGGGATGGGATTTTCCCAGGGCACCCTGTGAGTCACATGCCACTTGAGACAAGGGTCTAGAGCTCCAGCATTTTCCAAGCTACAAATGTATCTGCTGCTCCAAGTGTCCTAGATCAGGACCCTAGGTAAAGACTTCTGAAAAATACTTGAGTCTAGAAACAGAAAAGAAAAAGGGCTAGTGTGCTCTAGGGGTTTGCACTGTTGTACCCAGTTTGCTTTGCTGTGTCCTAGGAAA…
23244	PDS5A	133	126.511278195489	125	NM_001100400	GTGTGCAGCCCGACTAGGGGCGGCGGCGCAACCACCTGACAGAGGCCCGGGCGCTCGATGCACCTTCCGCCCGCATGAGGAGGAGAGGCCGGTAGAGGACTGTGAACCAAAAGTTGTCCCCCAGG
125170	MIEF2	55	116.090909090909	120	NM_139162	GGCCCTAGTCGTTGGGTTCCAGGGTCCTTCACGTTCCATTCCCAGGCTGGTCTGAGCTCCGGGGCCGTGGTCCCGCTGCCTCCTCCGGTCGTCGTGCGGAAGCTGCGACGCAGGCAGACC
83852	SETDB2	109	868.853211009174	877	NM_031915	GTGGTTGAGATGAAGGCTAGTAAATGGTGAAGTACTTCCCGGCCAGAGGGCACCTGCGCTCGGGAGGTTTGGGCGGCTTGGCGTCGGAGGAGAGCCCCACCCGCGGAGGAACCCAGCCTTGCCAACGGAGCTGGCGGAGCTCACTCCTCAGGTCAGGCGGGCGGCGTAGAAAACGCAGCGGAGCCAGGTGAAACCAAGGCACCGCCGTGGCTGGCCCCCGACAGTTCCTCTAGCCGGGAGGTTGGAGGAGCTGAAAACGCCGCGGAGCCCTCGGCCGCCCGAGCAGGGGCTGGACCCCAGCCCTTGCAGCCTCCCTTCTCCTGGCACCCAAGTGCAGTCCTGGCTGCAGAAGGGGCCGCGGGCGCACTGAGTTTCCAACCTCCATTTCAGCCTGTCTGT…
55572	FOXRED1	134	29.813432835821	24	NM_017547	AGAGGGTCCGGGCTCAGAGGGGTT
57644	MYH7B	671	456.670640834575	459	NM_020884	GGCCCTCGCGCCGCTACCCAGGCTCAGGGGGCGGGGCCTCGATGCGACCCAGTGCGCTTGCGCTGACCGCCCCGGCTAGGCTTAAAGAGCAGGCGGGGCAGAGACCCATACCTTTGGCGCTGAGTCGAGGCCAGGAAGGGGCGGTCGATGAGAGGGCGGCCTTAGCATTAGGAGTGCGTCGGCTGCACCCTGGCGGATGGACCTTGGGAAGGAGGGGAGGGGACCATCGGGGTCGGCGGGGAGCTACGGGTTCCCCTCTTCCAAGACGGGTGCCAAGTGATGAGTATCAGGTGTCTATGGTGAGATTTGGGGAGGATCCCAGACCTTAACAGCCCTTTGGTTGAAACCTCTCACAATGTGGCAGAGATGGGGTTTTGATGTGTTGCCCAGGCTGGTCTT…
339175	METTL2A	4428	10.4900632339657	9	NM_181725	TCCGGTGTC
147694	ZNF548	399	109.057644110276	108	NM_001172773	GAGGCGGGAGTGAGTCAACTGACAAGCGCTGGGGACAGTGGCGTCCTTGTCTTGCCTTTGTCGCTCCCGCCCCGCTCTTCCCTGGCTGGGCTGGCGGAGGCCTTGCTG
9810	RNF40	718	143.820334261838	148	NM_001286572	GAAATCCAAGATGGCGGCGCTAGGCTGACCCTCCTGCTGGTGAGGGCTCTGGCGCCGGGGGGGACGGGATCCAGCAGGTGACGGAAGTACCGCCTCCTCCCGTCTGACGCCCCTCAGGGGACCCTGCATCGCTCCAGCCGCCGCGGCC
2664	GDI1	13302	72.932265824688	70	NM_001493	GGTGGCGGCGGCGACTGCTGCGGTGAAGGAGGAGGAGGAGCCGAGCGGGCGCTGGCACCGAGGCCTGACC
55313	CPPED1	1115	93.922869955157	111	NM_018340	GAGATCAAAGGGCGTCGCCCAAAGCGGGACAGGTCCAGCGGTTGTTCTGTGTGAAGTCGCGCGGCTTCCACCCACGCAGTGTTCTAAGTGAAGGCCAGAAACTCGCTCGCC
11180	WDR6	76	20.5	23	NM_018031	ACCTGTAGCTGAGGGCGCTGTTG
493911	PHOSPHO2	64;64;56;64	542.875;343.875;328;424.875	546;347;328;428	NM_001199287;NM_001199288;NM_001199285;NM_001008489	GCCGGAAGTGACGCCAGCCGTAGCCGAGGAACAAGGGAGGTGCTGCAGTTGGCGGTCGGGCTAGAGAAGAGAGGCGCCTGCGCTTGCGAGCTGGGCTTGTGAGTGGGGCTGCCGAGAGGGCAGGCGTGGGGCGAGGCCAAAGGACTGAACCCGCAGGAGCGTCACGGGCGCCGGGGCGGCTGCCGACGGCGGGACTGGGTTTTCTATCAGATGTTCCACGTAATAATGCTGGAGTTAAGAAGTTTCCATTATTTTGCTCCAAACCAGAAGACTCTGTTCCCTGTATATAGAATAGGAGTAATATTTGAAAACAACTGGCTGATGTTTAAAACTGAAGATTGTCATGATTGTTTATCCTAATCCCAATGCTGAAGTAAGATTGTCTTGGAAATACTAAGT…
684	BST2	193	11.523316062176	13	NM_004335	AGGGGAGATCTGG
54469	ZFAND6	573;654	301.003490401396;136.577981651376	301;137	NM_001242913;NM_001242911	GCCCGAGAGCCGGAAGCGGAGGGCGGCCGGCCGGCGCAGCAGATACTTTGGTGTTGAACATTTGGGATAGAAGAGAGAAATTTAAAATTAAAAATTTTCCATATTTCTATCACAAATATTGGAATGAATCTGAAGTCTGCTGCAGTAAAACACAGAAGGCTTTAAAATGTTTTCTTGCATAAAATTCAAAACTTTTAAGTAGCTGCTTATGAGAATAGGGAAGGCAGAAAGCTAATGTCTGTCTCAAGATACAGGACAGCTGTTTGCTCATCAACCTCAACTGTGTGTGCAACTGAGGAAC;GGAGGGGCCGGCGGTGGCGGAGCCGGAGCAAGCAGGGGTTCGGCGGCATTACCTGTACCCATTCACCGGCGGCTACCGGCGGCGGCGCGCAGCGTGT…
10980	COPS6	12757	13.5508348357764	9	NM_006833	GCGGGGAAA
8683	SRSF9	221	60.122171945701	4	NM_003769	GCGG
11083	DIDO1	74;84;1087	281;282.166666666667;301.374425022999	281;288;305	NM_001193369;NM_080796;NM_022105	CTCTAGCCCCGCGCCATCTCGGTGGCCGTCCGCCCACTCCGCGGCGTTCGGGGAAATGGCTGCGAGACCCTAGAGGCCTGCGGAGCTTACTCCACGGGAACAGCCTCTAGATAATCTGAGTTGTTGAAAATACGAAGCCTGTTACTCGTGAACAGTGGCTGACAACAGTGTTGTTGTGAGCCTGGCTGTCTGCTTGGACCCAGAGGTTTCGTCTGCCAGGGTTTTTGGTTGTATTTAGGATTTCAGGGAAAAGTGTCCAAGCTTTCAGTGTTGGAGCAGGT;CTCTAGCCCCGCGCCATCTCGGTGGCCGTCCGCCCACTCCGCGGCGTTCGGGGAAATGGCTGCGAGACCCTAGAGGCCTGCGGCCTGCGGAGCTTACTCCACGGGAACAGCCTCTAG…
1499	CTNNB1	882	230.098639455782	210	NM_001904	CTCTCGGTCTGTGGCAGCAGCGTTGGCCCGGCCCCGGGAGCGGAGAGCGAGGGGAGGCGGAGACGGAGGAAGGTCTGAGGAGCAGCTTCAGTCCCCGCCGAGCCGCCACCGCAGGTCGAGGACGGTCGGACTCCCGCGGCGGGAGGAGCCTGTTCCCCTGAGGGTATTTGAAGTATACCATACAACTGTTTTGAAAATCCAGCGTGGACA
159090	FAM122B	1738	813.020713463751	962	NM_001166599	AGCGGAGGTTCCCGCTTCTGAAGCGTGGGAGGCGGAAGAGACTGCAGGTTGTAGATTTTGGTCTTGGCCCCAACGGGTTCCCCCAGACCATTAGAACCCGAGAGAGGAAGAGGAGGCACCGCGGCGGCGGCTGAGAGGCCGAACCCCCAACCTGTCCTCGAGGCGGGAGGGGGGCAGGGAGGGGAGAAGCACCGATCCCAGGGCTGAGGAGCCTCCGGGACCGGGTCCGGGAGCATGGGGGGCTGGACCGGGTCCCCGAGCATGGGGAGCTGGAGCCGCCAAGGCCGCCCGGCCGGGTCCTACCCGACTGTCAGGTCCTCGGTGCTAGCGCTGCCCGGGCAGCCGCAGCATCTGTAGCCCGGCCCCGCTTGTGGTCCTCAGCCGGAAAGATAGCAGCAT…
6895	TARBP2	1623	99.639556377079	101	NM_134323	GGCCGCGACTCCGGGCTTGGCCCCGGCCCTAGCTCGTCGGCTGTGTATTGGGGCGCGTGGAGGCTGCAGTCACGGTGGCGCCCGCGGGGACGGAGGAGGGA
157313	CDCA2	1130	236.202654867257	238	NM_152562	GGAGGCTGCCGGGCAGAGCGCAGGCCAGGATCAGCGCAGGCTGTGAGTCCAGGTCAGCCGTCGGGACCTCGGGCTCCGGGTTCGAAGAGCGGCTCCCGGCTGCGGGTGCTTTGCCAGGAGAGCCCTTCCGGACAGAGGAGCCGGGGTCTGGAAGGAGCGGCCGACGCGACGCTCGCCTGCCACGGGGCTCTGGGAGTAAGCCTGTCTGCCTGGCGGGCCTTCAGGTGCGGCGTGAGAG
9788	MTSS1	314	468.617834394904	509	NM_014751	GCCGGGGCCGGGCGCGCAGGAGTGAAAAGGAGGCGGCGGCCGCAGCTGCGAGCAACAGATCCGGACGCCGCGAGCTGACCCGCTCTGCTGTTGGGCGATTTTTTTTTAATTGCAGAAAAATTTATTAAATTGGAAAATCTTGCGTTTTTCAATGGCGCTGGCCCCGGGTCAGCGGGCGATTTTCTCTGCATCAAGATGGGCTTTGCCGTTTCCGTAGTGGGCACCAGTGGTGGCCTGATTGTCAGTCTTCTCCCGGCATTTTTAAGGCCAGGAGCCGAGCGCTGCTTGTAGGCGAATACCCTACAGAGCGGTTTGGCTTTTTAAATTACTGTTATTATTTTGGGCAGAGAACAGTCGGTCTGGTGCACCCCGTCCTCGCTGCAGAAGAGGCTGCGAGTC…
57282	SLC4A10	502	269.308764940239	276	NM_001178016	GGCCAGCAGCCCGAGTGAGTAGGAGCCATGTGACTCTGGTGAGTTGGAGTGTGCAATTGCCTCCTGCTTCAGAGCTACCTGATCCGAATACTAAGCAGAGCGAGTGCCGGGCTGAGTGTAAGACACTGAAGACACTGCAGAGCAAGGTGCTTATTCCAGAGGCGTTACAAAACATGGAGATTAAAGACCAGGGAGCCCAAATGGAGCCGCTGCTGCCTACGCCCTGAAGATGCTGAGACATAGAGATGGCTGTGATTATCTTTTGTAAGACAGGAA
6892	TAPBP	856	143.968457943925	60	NM_172208	GAGGAAAGTGAAAGTGAAAGGAGGAAGAGGAGGCTTCATGGCTGAGGAGGTCGCAGCGCC
92579	G6PC3	3764	66.407279489904	55	NM_138387	GGACTCTGGTTTCCGCCCTGGAGCAAGCCGGGGCCTGGTCGGCAGCTGGGCCGCC
79841	AGBL2	85	277.976470588235	278	NM_024783	ACAGAAGGCGGTGGCGGGCGGGTGCAGCGAGTTTGTCCCCTTGCCCGCACACTGCTTGGCCTCTGTACTTAAGTGCGGTGGCCGCCTGCCTCGCTGGAGCTTCTCTGCCGCAGCCATCCGTGCTGCTTGGGACGGGCCGGGGCGCGAAGGCGGTCGCATCCATCGCTCTGCCCTCCTGCTTCTCTTGTGTAATCAGCTGCCTATTTGGAAATTGGGCAGGGTTTGCGACTGGATGCTAATGTCACTGACTAGTTTTCAGCCTACCATCCAGAAGTAAC
598	BCL2L1	2346	378.780477408355	381	NM_001191	CTCGATCCGGGCGATGGAGGAGGAAGCAAGCGAGGGGGCTGGTTCCTGAGCTTCGCAATTCCTGTGTCGCCTTCTGGGCTCCCAGCCTGCCGGGTCGCATGATCCCTCCGGCCGGAGCTGGTTTTTTTGCCAGCCACCGCGAGGCCGGCTGAGTTACCGGCATCCCCGCAGCCACCTCCTCTCCCGACCTGTGATACAAAAGATCTTCCGGGGGCTGCACCTGCCTGCCTTTGCCTAAGGCGGATTTGAATCTCTTTCTCTCCCTTCAGAATCTTATCTTGGCTTTGGATCTTAGAAGAGAATCACTAACCAGAGACGAGACTCAGTGAGTGAGCAGGTGTTTTGGACAATGGACTGGTTGAGCCCATCCCTATTATAAAA
9776	ATG13	765;699	394.107189542484;370.220314735336	397;341	NM_001142673;NM_001205120	GAAGCGGATGAAAACAAACACTAACGATGGCGGCGCCGGGAAGCGACCGGCTGCTGGGCTTAAGGCGGGAGTGACCGCTTAACCAGTGAGGGAAGCACTGAAGAGCGCCAGTCGACGTGGGTGCGACAACTCGCGGAGTCTTAGGAGCAAAACGTCTGGGGCCTGCGAGCCAGGACCCTTCTGAAGCCTTAGGTGTCTATCGGCGACGTGTACGGTCACTGCAGCTCCGGAGCGCGGAACCCTCAGCCAGGAGGCGCGGCTGGTCGGTCCCAGGTCCCGGCCTCCGTAATGAGAGCCCGGAACCACTCTTTGTGCCGCAGCTTCGCAGCATCTTGGACTCAAGTGATTCTCCTGCCTCAGCCTCCTGAGTAGCTGGGACTACAGATTCCTATAGGCA;G…
55298	RNF121	2616	76.157874617737	75	NM_001300926	GGGGGCGAGCCGTGAAGATGGCGGCAGTGGTGGAGGTGGAGGTTGGAGGTGGTGCTGCTGGGGAACGGGAGCTGG
348654	GEN1	262	222.293893129771	220	NM_001130009	GGATTCGAAACGCTTCCTGGTGCTCCTGGGCCTGGCGGTTGAGCCCGGGGAGCTAGTCTTTGCTTGGGTAAAGAAAGAGGACTTTCCTTTTTTTTTTTCCTTTTGAGAAAATTCAGAAATTTGGAGGCACAGTAGTTAGGATTCAGGCCAAACTGGTAAATGACGAAGGGGCTTCTTCCAGAGCCAAGGAGGAAGGGTTGTCCGGCAGATAATCACCAGA
51255	RNF181	10966	22.422852453037	19	NM_016494	GTCAGAAGGCTGGGCAGCC
163183	SYNE4	1377;1377	98.4458968772694;98.4458968772694	96;96	NM_001039876;NM_001297735	GGGTGACTCCAGCGGAGGAGCTCTGGGACACCCTTGTCTAGGGAAGAGGTCTTACTGGCTGCCCTCACCTGACTTTGTGTCCCCAGGCCCCCAGCC;GGGTGACTCCAGCGGAGGAGCTCTGGGACACCCTTGTCTAGGGAAGAGGTCTTACTGGCTGCCCTCACCTGACTTTGTGTCCCCAGGCCCCCAGCC
119391	GSTO2	219;426	20.6164383561641;24.478873239437	4;19	NM_001191013;NM_001191015	GACC;GCTGATCCGCATCTACAGC
57761	TRIB3	1693	581.808623744832	566	NM_021158	GAACCCGGGAGGCGGAGCTTGCAGTGAGCCGAGATCGCGCCACCGCCCTCCAGCCTGGGCGACAGAGCAAGACTCTGTCTCAAAAAAAAAAAAAAAAAGAGCAAATTTTTTTTCCAAGGTGATAGGGAGAGTCCGTGGCTGATGTCTGCACTGACCAGACGCCCCTAGGGGGCCAGCGAGGGCGGGTCCCAGGTGCAGCGGATGCAGAGGAGAGAGGCCCGGGCGCGGCGCGGGGGATGGTGCGATCCCGGGCCCGAGGGCATCAGACGGCGGCTGATTAGCTCCGGTTTGCATCACCCGGACCGGGGGATTAGCTCCGGTTTGCATCACCCGGACCGGGGGATTAGCTCCGGTTTGCATCACCCGGACCGGGGGCCGGGCGCGCACGAGACTCGCAGC…
56339	METTL3	1152	63.595486111111	73	NM_019852	ATCCTGGAGCGAGTGCTGGGAGGTGCTAGTCCGCCGCGCCTTATTCGAGAGGTGTCAGGGCTGGGAGACTAGG
57563	KLHL8	462	275.883116883117	290	NM_001292006	GGCCGCGCAGGAGAGCGCGCGTCCGCCGGGTGCTCGCGCGGGGTTGGTGAGGTTCCGCTGAGGGCGGCCGGGGCTCTGGGAGCGTGGTAACGTGGCTGCAACCTTAGCGACATCAGGAAGAACAGGGTCGAGGATCGAGTCACAGCAAACTGTACAATGGCAGTTGAGTGGGTTTTGAAAAACGTCTGAATTGTAGTGTCTACATCTACCTTCTGCCTTCTCTCTACCCTTTGAAAAAAAATAAATGGCATGTTTGAGAAGAGAGCTCTATTAAAAGAGGAATATTGCAA
5524	PPP2R4	10418;10418;10418;961	173.102226914955;173.102226914955;173.102226914955;18.094693028096	186;186;186;9	NM_178000;NM_178003;NM_001271832;NM_021131	ACCGACATGGCGGCCGTCTTCGCTGTGGTGACTTTAACTCTCGGTTTTCGGTTATAGCCGGCCGGCGCTCACTTGTCTTCAGGAAGCTCGGAGCCTTTGGTGGAGCCGGGGAGAGGAAGGGTGGGTGCAAGAGTGAAAGGCGAGAGGGGACTGCAAGCATCCGGGTCGGCTCCTGGCCGGAGCAAG;ACCGACATGGCGGCCGTCTTCGCTGTGGTGACTTTAACTCTCGGTTTTCGGTTATAGCCGGCCGGCGCTCACTTGTCTTCAGGAAGCTCGGAGCCTTTGGTGGAGCCGGGGAGAGGAAGGGTGGGTGCAAGAGTGAAAGGCGAGAGGGGACTGCAAGCATCCGGGTCGGCTCCTGGCCGGAGCAAG;ACCGACATGGCGGCCGTCTTCGCTG…
163050	ZNF564	512	165.2109375	176	NM_144976	GGGGCAATGTTCAACAACTCCGCGGGGTCTTCCTGTTTCGTGTCCGCTGCGTTTGGGTTCCGGTCTCCGCTTCTCCAGTGGCCCCGGTGGCTCCACCGCAGCGTCTGGCGCGCTGGGACCTGCACAGGCCGGAGAGAGCCGTAGGCAGGACCCCGGGACACCCTGGAAGCCAGGAA
51020	HDDC2	6908	89.029386218877	35	NM_016063	GCGGCCTGCTCCGCCCAGCCGGGGTCGGTGGCCGC
728113	ANXA8L1	287	104.822299651568	83	NM_001098845	AGGAGCCAGACGTGTGGAGTCCCAGCAGAGGCCAACCTGTGTCTCTTCATCTCCGTGAGAAAGGTGCCCCCGAAGTGAAAGAG
25870	SUMF2	2229	136.565275908479	145	NM_001146333	GGGGCCGTGGGTGTACGCGGCGCAGCGCGGCAGTCCTGATGGCCCGGCATGGGTTACCGCTGCTGCCCCTGCTGTCGCTCCTGGTCGGCGCGTGGCTCAAGCTAGGGATTTTGTCAGGGAGAAAAAGTATCGGACAGAAGCTGAG
64928	MRPL14	3553	80.610188573037	55	NM_032111	GGGGCCCGCGGCGGGATTTTCCCGGGCGGCGAGAGCGGATCTATCTTGGGATCCC
552900	BOLA2	2957	187.575245180927	154	NM_001031827	AAGCCGTAGCGCCGGTACGTGCCCCTCTCCTGTCTGGAGGCGGGTGTAGAAGTCCGACCGCGGAAGCCAGACTGCTGTCCAGTCGGCGAGCGCGTACCATTCAGCATCGGCTCCGCCCGAGTCCCACCTTCCTCAGGCTCTGATTGGCTGACAC
112942	CFAP36	2801	116.149589432346	71	NM_080667	GTGGCCCAAAGGCCTAACCGGGGTCCGGCGGTCTGGCCTAGGGATCTTCCCCGTTGCCCCTTTGGGGCGGG
7165	TPD52L2	2462;2468;2468;2468;2468;2468;2468;2468;2468	100.069455727051;99.967179902755;99.967179902755;99.967179902755;99.967179902755;99.967179902755;99.967179902755;99.967179902755;99.967179902755	129;129;129;129;129;129;129;129;129	NM_001243892;NM_001243891;NM_199360;NM_001243895;NM_199361;NM_001243894;NM_199363;NM_199359;NM_199362	ATCGCGGATTACGAAACGCCGCGGAGCTGAGGCAGTTCCGCTGGCTAGTGTGTACGCGGCGAGCTTCTCCCGGCGCCGCCCGCTCGGCTCCCATAGCGCCCGCGACAGCGGTCCGGACGCCGCCCGAAC;ATCGCGGATTACGAAACGCCGCGGAGCTGAGGCAGTTCCGCTGGCTAGTGTGTACGCGGCGAGCTTCTCCCGGCGCCGCCCGCTCGGCTCCCATAGCGCCCGCGACAGCGGTCCGGACGCCGCCCGAAC;ATCGCGGATTACGAAACGCCGCGGAGCTGAGGCAGTTCCGCTGGCTAGTGTGTACGCGGCGAGCTTCTCCCGGCGCCGCCCGCTCGGCTCCCATAGCGCCCGCGACAGCGGTCCGGACGCCGCCCGAAC;ATCGCGGAT…
54881	TEX10	11717	159.389348809422	166	NM_017746	GGCGGAAGGAGACGCGGCCGCGTGAGGACGAGGCTATTTGAAAACACGCTCCGGGAGCTAGAGCCTGAGGTCGGCGGCGCACGCTGTTGCCCCGTGGGCTTCTGCTCCCTCGCTTGTCTTCTCGGGCTTCTCGCCCCGGCCGCGGCCGGGTCCTCAGTAGTCGAGA
10006	ABI1	2785	107.116696588869	123	NM_001178116	ACAATACCAGGCGGGAGGGCGGGTAGGCGGTTTGTATCCGGGCTGTGAGGTGCTCGGAGCCTCGGCGGACCTTGCTGCCTCTGTCTCTTTAACGCGAGAGGAAGCGATGCAGAGGGGTGGAAA
9470	EIF4E2	3010	64.293687707641	76	NM_001276337	ACCCGGGCCCAAGGCTGAGGGACCCGGTGGAGCGGAAGTCACTCCCTGAGGCAGTGGCGACAGCGGCGGCGAGAGG
7846	TUBA1A	4671	257.332905159495	294	NM_001270400	GCAGGTTCTCTTACATCGACCGCCTAAGAGTCGCGCTGTAAGAAGCAACAACCTCTCCTCTTCGTCTCCGCCATCAGCTCGGCAGTCGCGAAGCAGCAACCATGGTGAGAATCGGCTTCGGCTCTTTGTGGCCGTTGGGTGGAGTCAGCGCCCCCAGGCTCTACTTGGAAAACCTTTAAGCTCTTTTCTTTCCGTGAGTGCATCTCCATCCACGTTGGCCAGGCTGGTGTCCAGATTGGCAATGCCTGCTGGGAGCTCTACTGCCTGGAACACGGCATCCAGCCCGATGGCCAG
56006	SMG9	3764	273.388416578108	274	NM_019108	GAGTCGCCTGAGGGAACTGATCTCAGCTCGGGCCCGCGTTACATCCTCCTCCTCTTCTTCCTTCGGCCCAGCTTTCCTTAGGGGCTGCAACCCGGACGCCGAGGCCGGTTTCGGAGTGGGGAGTGCCCATTTTCTCTCCTTCCCACGTTCCTGGCCCCCAGACGCCATTTGCAGGCGGGTGGCTTGGGTCAGCCTCCCCGCCCCCACCCGACTCCCGTCACGGGAGAGCGCACACCGCGCCCCGAGAACCAATCAGCAGCCGCGTTAGGTAACC
201626	PDE12	367	87.811989100817	104	NM_177966	GAGATCTGAATGAGTCAAAGCCGGCGGCCTCGGCTCCTCAGCTCCACCTGACAGTAGGCCGCTGATCGGCCGCGGGTCTTGTCGACCGCTAGGCCACCAGGTTC
5091	PC	361	121.279778393352	133	NM_000920	GCAGCAAGTTCGGTTGCACGGAGACCGCAGCTGTTCTCTGTCAGTGGAGGCAGCAGCGGTAGAGGCGGCGGCGAGGACTGGCGACGGCGAGGAGATAGTGTCTGCCTTCTGGAGAGCTGACCAAACACTAAGG
833	CARS	61	71.1803278688525	75	NM_001194997	GACTTCCGGGGCGGCGGTTGCATCAGATTCTAGGAAGTGTCTGTAGCCGCAGCTGCGGGTCCGGGATTCCCAGCC
9885	OSBPL2	2557	174.514274540477	162	NM_144498	GAGCTCGGCCGGCAACCGAGGGACCCGCGTCCAGATCTTCAGTGTCTATTGGATTTTTCCAAGAGAAAGTTTGTAAAATTCCTTACACTGTAGATGTGGATCAGATACGATGATTCAGTAGAAGAGCACATGTCAGGGGCAGTGGAGGCTGGCTGCTGAAGG
57175	CORO1B	428	85.93691588785	95	NM_020441	CACTTCCTGAATCCTGCTTCCTGCTTCCCAGAGGCCGGGATCCGGAGCCGCCCGAAGCCGGTGCCGCAGCCCCCTGCGCCCCCGGTGCCCCCGAC
81545	FBXO38	116	156.094827586207	154	NM_001271723	GGAAGCGGAAGTGCCTCAGCGGTAGGGGCCGGGGAAGTGTCTGTAGCGTCCCTCCCTCTCAACCACAATAACAGGCGGAGGGTCGGCGTAGGTACTTTGAACTCAAGTAAACAAAAGGGAAGATTTTCTCGTTGATACTGGAGACTGCACAACA
6158	RPL28	3304	39.6573849878935	42	NM_001136136	CTCTTTCCGTCTCAGGTCGCCGCTGCGAAGGGAGCCGCCGCC
64288	ZSCAN31	80	375.6375	370	NM_001135216	CGTAGCTTGCCGGTGCCCCGAAGGTGAGTCTTGGCCCCTTGTCGCGACCCGCCAGGTTCCCAGAAGATTTCAGGTCTGTGCCTTGGAGTAGGCGGGGAGGGAACGTCTGCGCAGGCGTGACCCCCGCCCCTACACATTCACTGGCCTGAAGCCCCCGTGGAGTAGGTGGAGGTCCCGCCCCTTATCCTGAAGATTAAACAGCCTTTCTTTGTCTGAGATAACGCCCGGAGTTCTTTGTCCTGCCTCCAAGACGATAAAGGAGCGCAGACACAAAGGTGTCTTCTCCTAAGGAAGATTAAATCAGAAAATTTTAAATCACAGTTATCCCTTTACTTAAAGCCAGAGTAAGCCTTCCAAATTAACCCCAGGA
8892	EIF2B2	4560	57.84649122807	73	NM_014239	CCCGGAAGTGCAAACTGTGTGGTCTGGCAGGTGTGGATTCCGCCGGTGAAGGCTGAAGGCAGCTACCTTAAAG
10771	ZMYND11	113	110.902654867257	110	NM_001202465	GTGTGTGTGGATACGGAGTGCATGTGTGGAGACAGAGGAATATGCTCCAACAAATTTCGGATAGAGGCGCCGAAGACAGGACGTGGGGAAGCTAAAGAAGTAAACAGGTC
50854	C6orf48	420	513.135714285714	513	NM_001040437	CTTTTTGCGAAGTGGGCTCGTGGGTTGGCAGTATGAGAGTTGTAATGGCCCGACTGTTGAGTGAGGGGGAGCAGGGGATCCCAACGGCTTGCGCTGCCTTTGCGCAGCAGCCGGCGGGCGGCCACGTCGCGGCCTGGCTGGGGTAGGAGAGGGCGGTCCCCAGTGCAGTTGGGTGAACTACCGTTGCACACTGGAGTTTCTGGTGTCTTTGCTTGGAACTGACCTAGCTCGTGGCAGGGGGAACTCGGCTAGCGGCCCCACAGCCCCTGCTGACTCAAAACAACTGAGTTGTAAGACGTTCATCGCCGTGTTATCCTTGAGTAAAGAAGCGGGCTTTTGCCATGTTGTCCAGGCTGGTCTCTACTCCTGGGCTCAAGCAGTCCTCCTGCCTCAGTCTCC…
54859	ELP6	972	114.770576131687	110	NM_001031703	GCGCGCTTCCTTGCGCGAGCCGGGCTGTCGGGTGTGTTTTGCTCTCCAGCCTCCGTCGTCTCTGCAGCACTCCGGGTTCTCCTCCAGAGCGCTAGTCCCAGGAGCTCGGA
27034	ACAD8	50	53.76	53	NM_014384	AACGGAGGTCGAAGGCGTTCAGACTCTTAGCTGAACGCGGAGCTGCGGCGGCT
8407	TAGLN2	620	106.704838709677	106	NM_003564	CCGGCTGGGCAGGGCGCACCACTTGCAGCTGCAGCCCTTGCCTTGAGTCAGTGCGCCGCTCTCCAGCCCGCTTGAACGCTCCCCGCAGCCACCGCCACCCATTGGA
79157	MFSD11	487	559.05954825462	566	NM_001242532	GCCCCGTCCAGCCGTTCCTGACTGCTCTTCGCCGGAGTCCGCTTCCCAACCCCCTTTCGCCAGAGCCCGAGAGCTCCGTCGGCTCTGCGTCCTGGCGGTGGGGACTCCCCGCGGAGCGCTTGCGCGTGCCAGGCCACCCGGGACTACGTTTCCCAGCGGGCCGAGCGGCCGGCGCCGCGGCTGCGGTCAGGTGACCCGGTCGCCTGGCCGCAGTGAGTCAGGCTGGGAGGGCGGGGCCGCGCCGGCTGCTGCGGCTGGCACTTGGCCCTTTAATCCCCTTCGTGGGCCCCTCAACCTGGAGCGGATAAATTCTTGGCGCTTCTCCGGGGGTTGTGCTCTTCCGTACTCGGATCGCTTCTTAGGAGTATCCTAACTGCCGGTGGGGAGAACTTCGCCCTA…
51390	AIG1	1271	27.553894571204	28	NM_001286589	GCCCAGCCGGTCCAGGCCTCTGGCGAAC
152687	ZNF595	3675	732.23156462585	826	NM_001286054	GGCGCGGCGTTTTCCTCTGGCTCCTGCGAGGGCTTGGTTTAGGGCTTCAGCTCTCTGCGTTCTCGGCTCCGGGAGGCCTCGGTGATTCAGCCACAGCCTCTGCCTCCCGTTGCTCTGTGACCTGAGGGTATTGGACAATTTGTAGCTAAGACTCCCGGATACCCTGAAGTCGGGAAATGGAACTCGTAACATTCAGGGATGTGGCCATAGAATTCTCCCCTGAAGAGTGGAAATGTCTGGACCCTGCCCAGCAGAATTTGTATAGAGATGTGATGTTGGAGAACTACAGGAACCTGGTCTCCCTGGGTTTTGTGATCTCTAACCCAGACCTGGTCACCTGTCTGGAGCAAATAAAAGAGCCCTGCAATTTGAAGATACATGAGACAGCAGCCAAACCCC…
51174	TUBD1	224	242.044642857143	240	NM_001193609	ATCTGAAGTTCGTAAATTGAAATTGAACATGCGTAATTAATCTTTCTGAATAGGAAAAAATATATACACAACAAAACTCTCCGTTTATGGAACATGCGCATTTGTTCTCAGTAAGTTTTTCGTTTTGAAAGTGAGCATGCGCATGGTGAGTAGGTTGGTCCGAAGTTTGAACCGGACAGAAGCGCTGGTCGGCGTCTGGCGGTTGTTTTTAGAGGTAATACACCTAGTTTGTGGCTCAGC
5689	PSMB1	35272	41.454042866863	38	NM_002793	GAGACAGCAAGTGTCGGATCCGCAGGCGCAGCCGTGCG
25865	PRKD2	504	626.958333333333	614	NM_016457	TCCCGACCGAACTTTTCTCCAACTTCTGCGACTCGTGAGATTCCCTTCTACCCACTCCGGCCCTCGGGACCCCTCTGCCCATCCCCTGGCCGGTCGGGTCCCTGCGAACCCCTTTATCTCTGGAATCCACTCGGTCCCCGACTCAGAGACTCCTGCCCTCCACCCCCAAGGTGAATTCCCCCGGGCCGCCTTCTGAGTGGGATCCTCTTCTTGGAGCACTGGATCCTGGGATTCCCTCTGCCCCCTTCTCAATCCCTCCTCTAGGGAAGGGGCCTTTGAATCGCGGGCTCTCCTGATCCCTGTGACCCCGACCTACTAGATTTCCTCTCAGGCTTCTTGGAATCTCAATCGCTGGGACCTCCAACCCACTACTTTTCTCCTTTCTGATCTTCTGGGAGC…
5527	PPP2R5C	1216	92.963815789474	77	NM_178587	GTCTTTTTTTTTTTAAACTAAAATGGAGGCTGGTTTCTTGCCTTAAGGAGCCCATTGCCTTTCCCGCTGAAGTCTAG
60673	ATG101	1962	466.481141692151	473	NM_021934	TTCCGGTCCCGGCTCAGCCTCCGACCCAGGTGGTCTGGAGCCTGCCGGGAGAGTGGTGGCATCTGAGAGGCTGGTCGTGGACTGTGGTTGGGGGAGGTGGGAGCTGTTTTAACCGTGTGCCCCCTCTCCTGTGCCGGCGTGGGCATCCCCCGGGGCAGTGGAACGCGGGCGCTCCTCCAGCTTCCGAGTCCAGCCAGCCTGGGCGCGGGGCGCCGCCCCCGAGACACCCGAGGAGTCCGTTCCTCCCTGGTTACGTGGACTGTGGAGCTGGTCTCTTGTGGCTCAGCGCCGTGCGGAGGTTGAAGCGTACCTGCGGAGGTCGCACCAGGGCGTGAGGAGGAGGAGGAAGGGCATGAGCCGAGCTTGAGGAATCCGTGCTCCAAACTCTACACTCAAGGG…
80207	OPA3	61	44.606557377049	30	NM_001017989	AGGTTGCGCGTGCCCTGTGAGACCGCCAAG
29916	SNX11	309	167.346278317152	149	NM_152244	CGGAAGGAGAAGCCGTGATCTGGCTATATGGTGGGGCGCGGGCGGTGTCGCTGTGGGGAGCTGGTGCTGTTCTCAGGAGCCAGCCTGGATCATTTGTTGGCAGTACATATTGGCTGAAGTCAGTTTTCATTTCAAGATGTTTCCTTCCA
64598	MOSPD3	531	239.497175141243	250	NM_023948	GGCCGTCGAGGTGGGGCTCGGCGGGTCCGAAGGAACCTGGGGCAGAGCTGGAAGAGGAAAGGTCTTGGGGGCCCTGGGCCTGGGTCTGCGGGAGCCCCATCTAGCGGGGTTCCAAGGCGGCGGCGGCATCAGTCGAGGCCCTGCTCCGGGAGCTCATCTTGTCCCCTTTCGCCCCTCACGCCCCCCAGCTCTGACTCCAGGCCCTGTCCCCTGAGCTCTGCCCTCGGATGTCCGACCGCCCAGAGCCTGC
89894	TMEM116	1246	667.166131621188	670	NM_001294314	TGAGGAGAAGCGCCAAGTGCGCATGGGGACGCTATAGCAATTCGTTTGCTGTCCTTCCTCTCCTTCGAAGATGACAAGGCCTACCATCGTTTCTTCCTGCCTTTGGGCCGTCAGGCAGTTGGTTGGGACCCGCTCCAACCCTCGGTTCTTCCTGCAATACAGTGGATACAATTTGTCATGGCTACTCTGAGTGTTATAGGTTCAAGTTCACTTATTGCCTATGCTGTATTCCATAATATACAGAAATCTCCAGAGATAAGACCACTTTTTTATCTGAGCTTCTGTGACCTGCTCCTGGGACTTTGCTGGCTCACGGAGACACTTCTCTATGGAGCTTCAGTAGCAAATAAGGACATCATCTGCTATAACCTACAAGCAGTTGGACAGTTCTGGAGGCTG…
389668	XKR9	440;229;440	637.302272727273;462;527.302272727273	636;462;526	NM_001287259;NM_001287260;NM_001011720	AGTGGTGGGAAGGCTGGCGCGAGGCGTGAGGTGGCGTGAGGCGAAGCTGGAATCTGCCTCTGTCACGGGGGCTGGTGCCTCACGGGTTTGTGTCCTAGACAGGCGAGTGGATCCAAGTGGGCGAGAGACATTTTAATCTGGAAGAGTCTTGTGATTTGGGAGACAGTGAAGAAGAAGTAAAATATTCACAAGATGAAGATTTTTCCAGAAGGGACTTTGAGTCAAAGATGGCTTTTTATATTTGACAAGATTCAAAATCTAGTGCATTAGACTTTTGAACTAGCTGTTCCTTCAAGCTGGAAGGCTTTTCCATCTCTATGCACATGGCCAATTTCACTACTCAAATGCCACCTTCTCAGTCTTGTCATCTGTAATGAAGATCATTGTGAAACAGAAGAT…
3161	HMMR	237;249;249	82.68776371308;47.738955823293;47.738955823293	84;50;50	NM_001142557;NM_001142556;NM_012484	AGTTGTCGAGGAGTGCCAGTCACCTTCAGTTTCTGGAGCTGGCCGTCAACATGTCCTTTCCTAAGGCGCCCTTGAAACGATTCA;AGTTGTCGAGGAGTGCCAGTCACCTTCAGTTTCTGGAGCTGGCCGTCAAC;AGTTGTCGAGGAGTGCCAGTCACCTTCAGTTTCTGGAGCTGGCCGTCAAC
9557	CHD1L	1045;1045;539	191.198086124402;309.198086124402;12.994434137291	202;320;9	NM_001256336;NM_024568;NM_004284	ACCGGCCCGATGGAGCGCGCGGGCGCTACTAGCCGCGGGGGCCAAGCGCCTGGCTTCTTACTGCGGCTTCATACTGAGGGCCGAGCCGAGGCGGCGCGGGTGCAGGAGCAGGACTTACGGCAGTGGGGGCTGACAGGGATTCACCTACGCTCTTACCAGCTGGAGGGAGTAAACTGGCTCGCCCAGCGCTTCCATTGTCAGA;ACCGGCCCGATGGAGCGCGCGGGCGCTACTAGCCGCGGGGGCCAAGCGCCTGGCTTCTTACTGCGGCTTCATACTGAGGGCCGAGCCGAGGCGGCGCGGGTGCAGGAGCAGGACTTACGGCAGTGGGGGCTGACAGGGATTCACCTACGCTCTTACCAGCTGGAGGGAGTAAACTGGCTCGCCCAGCGCTTCCATT…
54529	ASNSD1	3049	372.265004919646	374	NM_019048	GTGGCTAATGCCGTAGGCTCCTTCAGGGCTGAGCCATCCCGCGTGTCTTGCGCTCGGTGGAAATGCCCAGCCGAGGGACGCGACCAGAGGACAGCTCTGTGCTGATCCCCACCGACAATTCGACCCCACACAAGGAGGATCTAAGCAGCAAGATTAAAGAACAAAAAATTGTGGTGGATGAACTTTCTAACCTTAAGAAGAATAGGAAAGTATATAGGCAACAACAGAACAGCAATATATTCTTTCTTGCAGACCGAACAGAAATGCTGTCTGAGAGCAAGAATATATTGGATGAACTGAAAAAAGAATACCAAGAAATAGAAAACTTAGACAAGACCAAAATCAAGAAATAGTCAACCTGATTTCACATAACA
150946	GAREML	242	1651.42561983471	1677	NM_001191033	TTTAGTAGAGATGGGGTTTCACCATGTTGGCCAGGCTGGTCTCAAACTGCTGACCTCAAGTGATCTGCCCACTTTGGCCTCCCAAAGTGCTGGGTTACAAGCGTGAGCCACCGTGCCTGGCCTGCCATCTCCATTTCTGACCAGGCTGGTGGCCTGAGTACATCATCCTGAGTCCCTTCCTTCCCCACCTCCCCCTTCTTCTGTCACCCAAGCCTGCTGGGTCTCCCTTCCCAGTATCTCTTGGTCTGTTTCTGCTATTCCCTAGCTCTTCTCCAGAACCCCTTACTGGTTTGTTTACCTGACTGGTCTCCCGGTTATTTTAATAGAGCTGAACCTGGATCATGGTATTTCTTTGCTCGAAACACTCCAGTGGGTCTCATGTTGTACAGAATAAAGCTT…
84056	KATNAL1	206	100.553398058252	101	NM_032116	TCGGCGGCGGCGGCGGCGGCGGCCTGCGCCCCACCCGCACCCCATCTGGACCGCATCGCTGAATGTGCCCGGACCTGCGCCTTCTGGGTCTCTGAAAGAAG
400720	ZNF772	55	244.781818181818	236	NM_001024596	GGGTGGACATTTTGTTTGCTTTTCCATTAATCCACTGGTTTAGTTTCCAGAACGCAATGTCAGACCTGAGGTGACAGAAAAGGGAAAACGTGAGAGAGTGTCTTCTTCCCTGAAGAGAGGTGGGCCTGAGGCTTGACAGTGGCGCTGCCTGAGTGACCTAGCCGCTGGGCTGGGCCCTGGACAGCTGATCCCAGGTTCCTGCACTTGTCGCCACCCTTCCGTAGTCCACAGGCCTG
65117	RSRC2	3397	114.43921106859	120	NM_023012	GCCTTTGTGCCATCCGGGTCTCTCGCGCGAGCGATTTAGTCTGAGGCGAAGCTTCGGAGCGGCCGGTACTGTTGAAAGCGACAAGTGGAGGCGCCGCTCTAGCGGCCGGGACTCTGAACT
29085	PHPT1	15150	29.202442244224	21	NM_001287343	GGGGACTCCGGGAGGAGGAAC
23542	MAPK8IP2	245	37.138775510204	59	NM_012324	GCGGGGCGCGGCGAGGCTCCCGCACCCCCCGCCGCAGTCGCGGGCCTCTCCCGGAGAAG
208	AKT2	3498;3486	332.970840480274;185.213425129088	330;181	NM_001243027;NM_001626	GCCGCTGCCGGGAAACACAAGGAAAGGGAACCAGCGCAGCGTGGCGATGGGCGGGGGTAGAGCCCCGCCGGAGAGGCTGGGCGGCTGCCGGTGACAGACTGTGCCCTGTCCACGGTGCCTCCTGCATGTCCTGCTGCCCTGAGCTGTCCCGAGCTAGGTGACAGCGTACCACGCTGCCACCATGAATGAGGTGAATACATCAAGACCTGGAGGCCACGGTACTTCCTGCTGAAGAGCGACGGCTCCTTCATTGGGTACAAGGAGAGGCCCGAGGCCCCTGATCAGACTCTACCCCCCTTAAACAACTTCTCCGTAGCAGAATGCCAGCTG;GCCGCTGCCGGGAAACACAAGGAAAGGGAACCAGCGCAGCGTGGCGATGGGCGGGGGTAGAGCCCCGC…
54543	TOMM7	1999	58.7343671835918	65	NM_019059	CCCTTTCGGATTCCCGACGCTGTGGTTGCTGTAAGGGGTCCTCCCTGCGCCACACGGCCGTCGCC
152926	PPM1K	179	270.687150837989	215	NM_152542	GAGAATTTCCAGCAGGCAAGGCAGTGGCCGCTTTGACTGCTTGCTTCGGAGATCCGAGACGACGGAGAAGGCACTCTTATTTACCGACCAAGAAAGCTCCTCCCCCGTCCTCCGTTAGCTAATTAAAACATTTTTCAGGGACGTAGCCATCCAGAGACATTCCATTATTGTTCCATTGACCTTTCCCTCATCACTGAGTCCTTTGGAGCTGAGTT
23786	BCL2L13	1015	566.814778325123	542	NM_001270731	GCCGCTGGGGGACCCTGTCGGAAGCAACTGCCGCCGCCGCCTCTTTCATCTCTTCTGGGGCAGGGGCCAGGGCCAGGTTTTACACATCCATAAGTAGACCTTTTTGGAGCCTCACCAGCCAATTCAATGGCGTCCTCTTCTACTGTGCCTCTGGGATTTCACTATGAAACAAAGTATGTTGTTCTCAGCTACTTGGGACTCCTCTCTCAAGAGAAGCTGCAAGAGCAACATCTTTCCTCACCCCAAGGGGTTCAACTAGATATAGCTTCACAATCTCTGGATCAAGAAATTTTATTAAAAGTTAAAACTGAAATTGAAGAAGAGCTAAAATCTCTGGACAAAGAAATTTCTGAAGCCTTCACCAGCACAGGCTTTGACCGTCACACTTCTCCAGTGTTC…
79135	APOO	1939	201.352243424446	226	NM_024122	ACCCGCTGCCCGGGCGCGACGCGCTGCGGCTCAGCGACGCGGCTTCTAGAACCGGGTGATTGAACTAAACCTTCGCCGCACCGAGTTTGCAGTACGGCCGTCACCCGCACCGCTGCCTGCTTGCGGTTGGAGAAATCAAGGCCCTACCGGGCCTCCGTAGTCACCTCTCTATAGTGGGCGTGGCCGAGGCCGGGGTGACCCTGCCGGAGCCTCCGCTGCCAGCGAC
84248	FYTTD1	2012	47.98310139165	46	NM_032288	GACTCCGGCCTTGTCCGCGCCCGCTCTCGGCGCGACGTCTCCAGCC
57228	SMAGP	293	163.249146757679	164	NM_001031628	CTCCGCTCGGGGTCCTCGTTCGGCCTCTGCTGGCCTCCGCGACTCCGCGGTGCCCGCCCCCGTTGAGTTCAAAAGGACGCGCGGAGCGGCGCCGGCCCTTCACCAGCAGCCCGTCCGACTGGAAAGATCTGCCTCTTCTCCAAGAAACTCAACCACTAGTGACA
10973	ASCC3	1755	297.650712250712	282	NM_001284271	GTCTTTGCGTCTGTCTGTCTGACTGATGGTCCTCACACGCGGTTCCCTGTGACTGGGCGCGACCCCGGCAAGCGCGGCTTGGAGGGCGGACGGGGCGCGGCGATACAGCTGCCCGCTCGCATCTTTGGCCCTGCGCTCAGCTCCTCACCCGGCGTGGGAAGTTAAAGTAAAACCGAAAGGGAAGAAGGCGCGGTGGCAGGAGCTGACAGAGTGATGGGAAACGCGTGAGCCAGGCCGAGAGTTTCAGGTTTCTTGCTGTATGGATCACTGATTGAATAATAG
6188	RPS3	5952	265.131384408602	278	NM_001260507	TCCTTTCCTTTCAGCGGAGCGCGGCGGCAAGATGGCAGTGCAAATATCCAAGAAGAGGAAGAACACAGAATGTTCTTGGTGAGAAGGGCCGGCGGATTCGGGAACTGACTGCTGTAGTTCAGAAGAGGTTTGGCTTTCCAGAGGGCAGTGTAGAGCTTTATGCTGAAAAGGTGGCCACTAGAGGTCTGTGTGCCATTGCCCAGGCAGAGTCTCTGCGTTACAAACTCCTAGGAGGGCTTGCTGTGCGGAGGGCCTGCTATGGTGTGCTGCGGTTCATC
57146	TMEM159	322	219.304347826087	218	NM_001301775	GGAGGCAGGCGGCTCTGGCTCCCTCTCGGGACGCTCTTTCCTTCTTCCTCTTGTTCCTCCTCCTGCCTCTCTTCGCTTCGCCTGCAAACGCGGTGGGGGCTGCTCGGCGGTCAGGAGCAGCAAGAGACAGAGCGACATGAGAGATTGGACCGCGGGCTGCACTGGAGAATTTACTGGTAGGATAATTCATCCCTAAAGAGATTGAAGTGAGCTTCAGA
984	CDK11B	900	613.263333333333	609	NM_033487	GACGATACTTTTGGCGCGCGCCGGTTGCTGTTTCTTCTCTGGCTCCGGGACCGGCGGCGGCGGCGGCGGCAGCGGCGGCGGCGTAGGGTGTTTTAACTCAAATGGGTGATGAAAAGGACTCTTGGAAAGTGAAAACTTTAGATGAAATTCTTCAGGAAAAGAAACGAAGGAAGGAACAAGAGGAGAAAGCAGAGATAAAACGCTTAAAAAATTCTGATGACCGGGATTCCAAGCGGGATTCCCTTGAGGAGGGGGAGCTGAGAGATCACCGCATGGAGATCACAATAAGGAACTCCCCGTATAGAAGAGAAGACTCTATGGAAGACAGAGGAGAAGAAGATGATTCTTTGGCCATCAAACCACCCCAGCAAATGTCTCGGAAAGAAAAAGCTCATCACA…
1738	DLD	1870	72.666844919786	76	NM_001289752	GGGGAGACCTTGGCGGAGCGGCGGAGGCGCCCAGCGGAGGTGAAAGTATTGGCGGAAAGGAAAATACAGCGGAAAA
284361	EMC10	106	36.716981132075	39	NM_206538	GGCTCACAGCCGTCCCTTCGCTGGTGGGAAGAAGCCGAG
51112	TRAPPC12	53	135.132075471698	130	NM_016030	GCAGGCGTACAGAGCTCCCCGGGGGTGCCAGTTCCTCTCCGATTCCCGGCTTCTGTCACCTTCCTCACGGACCTTGGTCACGGCCGCAGGTGACCCCTTAGCCCAGCTCCAGTGGGCGGGTGGCAGGGTC
114987	WDR31	222	267.432432432432	268	NM_145241	GGCGGAGGCGCGGGAGGGCTCGGAGGCTGTTCCCACCCCCAGGCTCCGCGTTCCCGCCGGCCCCAGCTCCAGCCCCGCAGCCCACCGTGCAAACATGCTTAGACAGAGAAGAGATTAACTTCAGTGGCTTCCCACTAATTACAGAGATTAAGAAGTGGCTGCCTGAACTATTTTCCAAAGGATACACATTACAAATTATTGAATAGGGCAGCTAACCAAGAAGATCCTATTGGTTTGGGGGGAACACAACTTCCAGCAGCCACAAGGG
8741	TNFSF13	220;69;220;220;220	715.940909090909;120.985507246377;715.940909090909;715.940909090909;715.940909090909	671;117;671;671;671	NM_001198622;NM_001198624;NM_172088;NM_003808;NM_001198623	GCCTTATGTAAGAGCTTTTCTCGGGAAACAGGAAGTCCTGCTTGCCAATTTCAGCACAGGGAGTAGTGCAGGCCTTATTCCAACACACCCGGCCCAGCCTTAACCCCAGAACTCAGCCAGTTTCTTGCTTCCGTGCCCCTGGTTCTCCTCCCCATCGAGCCCACCCCTCCTTTCCCACCTTCAGTCACCCCTAGTGAACTGCCCCAGCGATCTCTGCTGTGCTTGACCCCGAGGGTCTTCCACCCTCGCCCTGACCCTGGACACTGCCCAGCTTGGCCCCCCATCCTGCTCCTGGCACAATGCCCTCTAGCCAGCCAACCTTCCCTCCCCCAACCCTGGGGCCGCCCCAGGGTTCCTGCGCACTGCCTGTTCCTCCTGGGTGTCACTGGCAGCCCTGTC…
2011	MARK2	153;153;153;64	527.516339869281;527.516339869281;527.516339869281;437.03125	549;549;549;427	NM_004954;NM_001039469;NM_001163297;NM_017490	GAGGAGGAGAGCGCGTCCCCGGGGTTTACCTTCTTCGGCTGTTTCCGGAATTCACCCGTAGTCTGTGGCCGGGAGGAGAAGGCGCGCCCCACCTCCCGTTTCTAGCCGCTTCGGATGTTTCCGGCTGCTGCCGGCGAAAAGAGCCGAGGGCCGGCGGTGGTGGCGGCCATGTTGGGAGCAGCAGGTCCGGCGGCGGCTGCCTGTGTGCCGGGCGCGGAGCAGTGCCGCTGAGGGCAGGGGAGGAGCGAGGCAGGCGGCCGGCTGCGGCGGCAGAGAGTAGGCGGAGCGGCGCGGCCCGGCCGAAAGGCGGCACAGCCCAGCCGGGGGTCGGGGGGGTGCGGTCCGGAGCCGCTCGGAGCCGGCGCGGCCTAGCCCGAGCGGCGCATCCCCGGGCTGGCG…
4833	NME4	135	121.044444444444	117	NM_001286436	GGGCCCTCCTGGACCCGGGAGCGGACCCTGGTGGCGGTGAAGCCCGATGGCGTGCAACGGCGGCTCGTTGGGGACGTGATCCAGCGCTTTGAGAGGCGGGGCTTCACGCTGGTGGGG
5511	PPP1R8	640;640;640	20.16875;946.16875;801.16875	18;944;799	NM_014110;NM_002713;NM_138558	GGGAGGGGGAGACGCAAG;GGGAGGGGGAGACGCAAGATGGCGGCAGCCGCGAACTCCGGCTCTAGCCTCCCGCTGTTCGACTGCCCAACCTGGTGAGTGGCGGGGCGGCCAGGGCTAGAGTGGCCCGGCCGGAGCTAGCCTGGGCTGGAAGGGCGGCTCTTTTTTTACTTTTCTGCTGCGAGCCGAACGGCTCAGAAACCCCGGAATGGTTGAGGAAAAACTGTTTGCTGCACCGGGCCGGGCGACGTGTTGAAGAACCGAGAGCCTGGAGCCCAGGCCCAGGAACTGAAGAAACCCGGGGTTGGGGGCTCAAAGGCGCTCACTTAGGCAGCCCCTTTGAGCGATTAGCCAGTCGCCGGAGCGCTTCGAGGCCTTGGCCCGAACTTACGCCCAACTCT…
1457	CSNK2A1	2945	383.760611205433	426	NM_177560	AGCCTCGCTCTGGTCCCTGCGGCTGGCGGCCGAGCCGTGTGTCTCCTCCTCCATCGCCGCCATATTGTCTGTGTGAGCAGAGGGGAGAGCGGCCGCCGCCGCTGCCGCTTCCACCACAGAAATCAAGATGACTACCAGCTGGTTCGAAAATTAGGCCGAGGTAAATACAGTGAAGTATTTGAAGCCATCAACATCACAAATAATGAAAAAGTTGTTGTTAAAATTCTCAAGCCAGTAAAAAAGAAGAAAATTAAGCGTGAAATAAAGATTTTGGAGAATTTGAGAGGAGGTCCCAACATCATCACACTGGCAGACATTGTAAAAGACCCTGTGTCACGAACCCCCGCCTTGGTTTTTGAACACGTAAACAACACAGACTTCAAGCAATTGTACCAGACG…
6171	RPL41	29287	39.995185577219	40	NM_021104	CTCTCGGCCTTAGCGCCATTTTTTTGGAAACCTCTGCGCC
829	CAPZA1	2267	34.880899867667	14	NM_006135	CAGAACAGCCCAAG
57535	KIAA1324	2198	244.859872611465	240	NM_001284352	AGAAGCAGCAGCCGCAGCACCTGAGCCGCTACTGCCGCTCACTCAGGACAACGCTATGGCTGAGCCTGGGCACAGCCACCATCTCTCCGCCAGAGTCAGGGGAAGAACTGAGAGGCGCATACCCCGGCTGTGGCGGCTGCTGCTCTGGGCTGGGACCGCCTTCCAGGTGACCCAGGGAACGGGACCGGAGCTTCATGCCTGCAAAGAGCCTTCTCCTGCAACGCCGGGGAGTTTCTGGAT
3611	ILK	244	517.454918032787	519	NM_001014795	GGCCGGCGGCGGGCTGCGGGCGCGGCCGGACGGGAGTTCCCCGGAGAAGGATCCTGCAGCCCGAGTCCCGGTGAGTGCGAGAGGACCCGCGCCCCCTGTCACCCCTCACTTCTCCTGAGTCCCAAGTAAGGAACGGAGCCAACCCTGGGGAGGACCCCCGGTCCCCTCTCCCAGAGTATACGGAGCCTGAACCTCCCCACTTCCCCCAACTCTGTTCGCGGATAGGGTCTAGTTGCCTGCTCTCGGACATCCGTTCAGCAGACACTACCTCTTCGTCACCCCCTGCCCACCCTGACCCGCCTTTACCTCGCGTCTAGAGGACACAGCCAGGGATCATCCCGCAGCCCCGAACTCCTTCACAGACCCCCACTAGCCGGGGACGCAGCTCAGGCCCCCTAC…
81502	HM13	6122	89.433681803332	100	NM_178582	GCCTTAGGGGAACGTGGCTTTCCCTGCAGAGCCGGTGTCTCCGCCTGCGTCCCTGCTGCAGCAACCGGAGCTGGAGTCGGATCCCGAACGCACCCTCGCC
5901	RAN	2151	80.568572756857	78	NM_006325	GGCGTTTGAATTGCGCTTCCGCCATCTTTCCAGCCTCAGTCGGACGGGCGCGGAGACGCTTCTGGAAGGAACGCCGCG
10360	NPM3	1574	16.6550190597205	5	NM_006993	ACAGC
332	BIRC5	7612	47.334209143458	64	NM_001012271	GCGGCGCGCCATTAACCGCCAGATTTGAATCGCGGGACCCGTTGGCAGAGGTGGCGGCGGCGGC
10206	TRIM13	305	712.822950819672	717	NM_213590	GGGGCTGTGCTTGGCGCGTACCGTGCGGTCCCTGTAGTTGGAGGACGGGCGGTCGCGCGGCCTTTCCCACTAGCCGGAGGTCGGAGATAAGTACCCGCCGCCCGGCTCCTCTCGGGAAAGCGGGGTGGTCCTCGAACCTTCAGCGAGGGTGGGGAGTTGCCCAGGTCAGCAGGGATCTGCGTGGGTTGGGGGGGCTGGCGAAGGCCGTCTGAGCTCCAGTCCGGCAGCGCGGCAGAAACCAGCGGGGCACTGTCATGGGCCTGGGGAGGAGCGGCCTGCGGAGGGCGCCGGGGCAGTGTGTCTGTGGTCCAGAAAACCTGCTCCGTCCGGAGCCTTCCTGGCCCCGCTACCAGCGTCTCCACATCCCCTAGAAAAGAAAAGACGGGTGTGGGCCTTAGG…
79902	NUP85	1272	68.808176100629	58	NM_024844	GGCCTGAGCGGGAAGCATTGGCGTCCGAGCGACTTCTAGGAGCCTGGGGTTCGGCGCT
100288413	ERVMER34-1	122	775.426229508197	767	NM_024534	CACTTCAGTTCCCGCCGCGAGCCTTCTTCTTGGTCTTCTGGCCTGGCGGCGATCGTCGGCCAGTTTATCCCTCGGAGTTGCACTGGCAGACACGCCGCTACTTTGTAGCGGGTTTCGGGCGGGCCACGCGTGCGGCGACAGGAACCCAACCCCGGCCGACCTTGGGCTCCAGGAATTCGTTGTCTACGTCTGCGGAGGTGCGGCAGCCTCAGTTTTAAGCGCAGGAAGGCAATAGAGGCTGTGCTCTGAACCTTTCCCTCACGATGATCTTCTGCCTGTTGACCATCCTGGTGTCTTTCCCATGTGGCCCTGTATGGTTGGCATGGTTCCTGTCTTTAGGACTTGTGATCAAGTATATCTGAAAGTTTTTAGAAGAAAAGATGTGTTGTAACCTCCCTG…
7534	YWHAZ	12689	115.763101899283	104	NM_145690	GGACAGAGTCTCAGCCTCGCCGCTGCTGCCGCCGCCGCCGCCCAGAGACTGCTGAGCCCGTCCGTCCGCCGCCACCACCCACTCCGGACACAGAACATCCAGTC
28989	NTMT1	6577;6577;6577;5884	152.94541584309;176.205868937205;176.205868937205;218.448674371176	167;193;193;215	NM_001286800;NM_001286801;NM_001286798;NM_001286803	GCGTCTGGTCGTGGTCTGGCGGAGCTGCGGTTGGCTTGTGGCGTCTCCGCCGCCGCCGCCCTCCCTTCCTCTTCCCCATCTTCTTCTCTCGGTCCCGGGAGCCCCCGCCCGGAGAGAGTCGCGGTTGCTGATCGTGGTGCTTGAGTAGAGCCGTGGTTGGTGACAGC;GCGTCTGGTCGTGGTCTGGCGGAGCTGCGGTTGGCTTGTGGCGTCTCCGCCGCCGCCGCCCTCCCTTCCTCTTCCCCATCTTCTTCTCTCGGTCCCGGGAGCCCCCGCCCGGAGTGAGTAGCGCGAGGCGGTGCGAAGGGAGAGTCGCGGTTGCTGATCGTGGTGCTTGAGTAGAGCCGTGGTTGGTGACAGC;GCGTCTGGTCGTGGTCTGGCGGAGCTGCGGTTGGCTT…
5033	P4HA1	1950	221.524615384615	226	NM_001142595	GCCCAGTCGCGCCGCCAGCGGGCTGAGGGTAGGAAGTAGCCGCTCCGAGTGGAGGCGACTGGGGGCTGAAGAGCGCGCCGCCCTCTCGTCCCACTTTCCAGAGATGAAGTCTTGCTATGTTGCCCGGCCTGGTCTCAAACTCCTGAGCTCAAGTGATCCTCTTTCCTTGGCCTCCCAAAGTACTGGGATTACAGGTGTGTGATCCTGTAAAATTAAATCTTCCAAG
8629	JRK	269	488.814126394052	512	NM_001077527	ACCGAGTGGCCGGCACTTCCGGCCGGCGGCGGCTGCTCCGGGTGAGCAGGCCCCTGAAGTGCTGTGCCTGGAGATACCATTGTGGACCCTGGAGAGGCACCTGCTGCTTATGCGGTAAAACCTCTACCACCCCAAACCTGGTCAGTTTGAGGGGAGCCGCTGCCATAGTATCCACAGAGAAGGCCGGAGTTCCAGCCGTGTGGAGCAGCAGAGGGGAGTCTGACAGGGTCACCTCCTCCACAGAGAGAATTGGCAGCTGACTGCACTGCCAGGAGCCAAGGCCTAGGTGTGTGGAGCCTGGAAGACCAGGGATACCTGAGGCAGGAGGTGCAGCGTGTGGAGTGAGAAACCCGAGAGGGACTGGGGCCTGTGCTCAGGATCAGCAGAGCAGGCAGGCAG…
728635	DHRS4L1	448	489.470982142857	516	NM_001277864	GGAGGGGCGCTCACGCAACCGCCACTGTCTGGAGCGGGCTCGCCTCTGCGGCGGCACTCACCGCCCGGGCTTTACTGAAGCGGAGTCTAGCATGTGCGGCTGCTCCACAGCGGTGTGGGTGGCGGCGGCTCCTCTGCAGCAGCCTCGGCAGTAGGGGTCACGGTGGCCAAGCCCACCGTGGAGCTCATCTGAGAGTTGTAAGGTACGGGACTGCCTCGGTCTTTGGGACGCCCCGTCTGGTAGCATCCCAGATCCAGCACGTTCCTTCCGGCCCTGCACCCCGGCCCGGTGCCTCACACCCCGCTACCCCATGCATCCAGACTCTAAGGCAGCCCCTGCATCTCAGTCCTGACATCGCTGTCCCTGGAGCATCCTCCGCTGGAGCTGGAGCTTGACAGG…
10948	STARD3	53	155.849056603774	155	NM_006804	GGCGCTGCCGGAAGATCTTCTTCCGCTCTGAGGCGCTACTGAGGCCGCGGAGCCGGACTGCGGTTGGGGCGGGAAGAGCCGGGGCCGTGGCTGACATGGAGCAGCCCTGCTGCTGAGGCCGCGCCCTCCCCGCCCTGAGGTGGGGGCCCACCAGG
692312	PPAN-P2RY11	142	65.119718309859	66	NM_001040664	GCCGGAAGTGAGCTGCGCAGCGCCGGAAGCGGCGGACGCAGGAGGCCTCGTGGAGGACACAGCAGC
80174	DBF4B	259	110.235521235521	88	NM_025104	GGAATCGGGAAGAGCTCATGGAGCTCGCGAATGTAATACGGAGGCCTCTGAGGAAGGAGTACGGAGGCCGAGAAGGAGCCGGCATTTG
81691	LOC81691	235	276.276595744681	327	NM_001199053	CCGTTCAAAAAGCCCGCGAGGCTGAGGGGCGGTTGTTGTTGGCAGCTGTGGCTAAGGAGGGGAGAACCTCTGCTCCCCGCCCGTCTTCTCTTCTGCGTTTCCCGGGCTAGGGGGCGTGGGGAGTGGTTTTAGGCGGCGAAGCCGCTCGGCAGCACCTTCCTTCTTTGCCAGGCAGACGCCCGTTGTAGCCGTTGGGGAACCGTTGAGAATCCGGTAACCGATGCGGACGGTAAAGCCGTTTGGGTTAGAGCGGCGCGGGTGTCCAGTCCGCGGAACGGGGAGATCGTTGGCACCTTCGCTTTTTTAGGGGAACGGGGATAGTTCGCC
222223	KIAA1324L	517	329.141199226306	352	NM_001291991	GGCGGGCGCCTCTCCCCCAGCCTCGCTGCCGCCTTGCAGTTTGATCTCAGACTGCTGTGCTAGCAATCAGCGAGACTCCGTGGGCGTAGGACCCTCCGAGCCAGCTCTTCTTGGATCCCTCGTGGAAACTACATAGAATCTAATCGTGATGACTGCACGGTGTCTTTGATCTATGCTGTGCACCTTAAGAAGTCAGGCTATGTCTTCTTTGAGTACCAGTATGTCGACAACAACATCTTCTTTGAGTTCTTTATTCAAAATGATCAGTGCCAGGAGATGGACACCACCACTGACAAGTGGGTAAAACTTACAGACAATGGAGAATGGGGCTCTCATTCTGACAGCTCCTTAA
51008	ASCC1	4725	260.697566137566	299	NM_001198798	CCAGGACCAGCCTGAGTGGCTGCGCTCACCACGACGAGGACCGCGGCGTGTTCGCCCCCCAACAGACGGAGCCAGCGGCGAAGGCGGCGTGCGCGCGCCCGTGCCGTGGTGGGCGTGGCCGGGGCGGAGACGCGAGGAGGGGAGCAGAGAACGCGCTCGCGTAGAGGAATTCCGGGTCCTCCTCCTCGCCCTACCTTGGTTTACCTGCAGCCGCCTAGTCCTCTTCTCCTTCTCTTTGATGATTCAGGGCCTCGGCTTCCCTCACGGGCATAATTGGAATATCATTTGGAGAAAGTGTC
51192	CKLF	4241	119.385758075925	113	NM_001040138	AGGGGAGGGCGGTGCTCCGCCGCGGTGGCGGTTGCTATCGCTTCGCAGAACCTACTCAGGCAGCCAGCTGAGAAGAGTTGAGGGAAAGTGCTGCTGCTGGGTCTGCAGACGCG
5589	PRKCSH	4047;4032;4047	153.108722510502;157.063492063492;153.108722510502	157;161;157	NM_002743;NM_001289103;NM_001001329	TCCGCTTTCTTTCTGCAGCAGGAACCGCGGCTGCTGGACAAGAGGGGTGCGGTGGATACTGACCTTTGCTCCGGCCTCGTCGTGAAGACACAGCGCATCTCCCCGCTGTAGGCTTCCTCCCACAGAACCCGTTTCGGGCCTCAGAGCGTCTGGTGAG;TCCGCTTTCTTTCTGCAGCAGGAACCGCGGCTGCTGGACAAGAGGGGTGCGGTGGATACTGACCTTTGCTCCGGCCTCGTGTAGCGTGAAGACACAGCGCATCTCCCCGCTGTAGGCTTCCTCCCACAGAACCCGTTTCGGGCCTCAGAGCGTCTGGTGAG;TCCGCTTTCTTTCTGCAGCAGGAACCGCGGCTGCTGGACAAGAGGGGTGCGGTGGATACTGACCTTTGCTCCGGCCTCG…
1523	CUX1	674;672;674;674;674	44.277448071217;44.0580357142857;44.277448071217;44.277448071217;44.277448071217	25;25;25;25;25	NM_001202545;NM_001202546;NM_001202544;NM_181500;NM_001202543	TCACTCCGTCTCAATATGTCTCAAG;TCACTCCGTCTCAATATGTCTCAAG;TCACTCCGTCTCAATATGTCTCAAG;TCACTCCGTCTCAATATGTCTCAAG;TCACTCCGTCTCAATATGTCTCAAG
3184	HNRNPD	4708	292.599830076466	313	NM_031369	GTCGGCCATTTTAGGTGGTCCGCGGCGGCGCCATTAAAGCGAGGAGGAGGCGAGAGCGGCCGCCGCTGGTGCTTATTCTTTTTTAGTGCAGCGGGAGAGAGCGGGAGTGTGCGCCGCGCGAGAGTGGGAGGCGAAGGGGGCAGGCCAGGGAGAGGCGCAGGAGCCTTTGCAGCCACGCGCGCGCCTTCCCTGTCTTGTGTGCTTCGCGAGGTAGAGCGGGCGCGCGGCAGCGGCGGGGATTACTTTGCTGCTAGTTTCGGTTCGCGGCAGCGGCGGGTGTAGTCTCGGCGGCAGCGGCGGAGACACTAGCACT
5253	PHF2	319	14.887147335423	8	NM_005392	GCGGCAAC
85016	C11orf70	236	31.3347457627119	30	NM_032930	GGCCCAGGCATCCACCCAGCCGAGAGCACG
7536	SF1	1599;1633;1633;1633	109.762976860538;116.109614206981;116.109614206981;116.109614206981	123;123;123;123	NM_001178030;NM_004630;NM_201995;NM_201998	GCGTGAGAGGACGGGCTCCGCGCGCTCCGGCAGCGCATTCGGGTCCCCTCCCCCCGGGAGGCTTGCGAAGGAGAAGCCGCCGCAGAGGAAAAGCAGGTGCCGGTGCCTGTCCCCGGGGGCGCC;GCGTGAGAGGACGGGCTCCGCGCGCTCCGGCAGCGCATTCGGGTCCCCTCCCCCCGGGAGGCTTGCGAAGGAGAAGCCGCCGCAGAGGAAAAGCAGGTGCCGGTGCCTGTCCCCGGGGGCGCC;GCGTGAGAGGACGGGCTCCGCGCGCTCCGGCAGCGCATTCGGGTCCCCTCCCCCCGGGAGGCTTGCGAAGGAGAAGCCGCCGCAGAGGAAAAGCAGGTGCCGGTGCCTGTCCCCGGGGGCGCC;GCGTGAGAGGACGGGCTCCGCGCGCTC…
9400	RECQL5	422	147.492890995261	161	NM_001003715	GACGGATATAAGATTGCGTGGGTTCTGCCTAAAGCTGAATTCCCAGCGCTTTGGCTTCTCTGAGTTGGGGTTGTGTATAGGGGTCTTCGAACAGTTCCGGAACCAGCCAGCAGCCTTTAATTCTTGGGCGGACCACGGCCGGTTCTGTGTTCTTGGCTAAG
7329	UBE2I	570;4680	112.915789473684;365.204487179487	104;363	NM_194261;NM_194259	GACGCTTCAGAGGATCCTTAGGCCTCAGTGGTCTTTGACCCCCGGCCCCAGGACCTGACCCCAAGGAAACCTCCGGGACCTGTGGCTGGAGAGGGACTTTGAAC;GAGGGAAGTCCCGAGACAAAGGGAAGCGCCGCCGCCGCCGCCCCGCTCGGTCCTCCACCTGTCCGCTACGCTCGCCGGGGCTGCGGCCGCCCGAGGCTGCCCTGAGGATCTGTGTTTGGTGAAAAGGAGCCAAATTCACCTGCAGGGCAGGCGGCTCTAGCAGCTTCAGAAGCCTGGTGCCCTGGCGACACTGGACCTGCCTTGGCTTCTTTGATCCCAACCCCACCCCCGATTTCTGCTCTGCTGACTGGGGAAGTCATCGTGCCACCCAGAACCTGAGTGCGGGCCTCTCAG…
64418	TMEM168	1052	453.37072243346	451	NM_001287497	GGATTTCGGCGGCGGAAACATGGCGGTCGCGGCCGGGCCGGTAACGGAGAAAGTTTACGCCGACACTGGCCTGTATTAGCGCGTATGGCCTCGGGCCCTCGTTCCCCAAGGCGTGCCGCCTCCCTGTTCTCAGTCGCAGGCTGAAGCCTTGTCTGCTCTCCTCCTTTTTGGTTTGGTTTTGGAACTGACTCCGAGGGTTGGGAGAGCGCGTTGGTGGCGACGGCCGAGTCAGGCTGTCTTTTGAAGAAGATCAGAATGGGGAAGAGTTTTGTAAATTAGCCATTTAAAAACAATCTGCCATGTTGATTTTGGTCCATAGGAAGATCACTATAAACAAAATTTCCACAAGAGAAAATGTTGAAATAGGAGTTGCGGATACATTGGATATACTGGATGAAA…
79008	SLX1B	2935	170.062350936968	172	NM_024044	AGACAGGAGAGGGGCACGTACCGGCGCTACGGCTTCCTGCAGGCTGCCTCCGGATAGTCCCCGAGAGCTTGTTCCGAAGCAAGCACCCTGCAGCCCTAGCGATCCAGCCCTCCCCTGGACCCTAGGTCACGGCAATCAACCCCCTGCTGTGGTTCCCGAACCCCAAGGCCCG
57541	ZNF398	635	633.699212598425	87	NM_020781	GTGGCATTTGATGATGTCTCCATCTACTTTTCCACTCCAGAGTGGGAAAAATTAGAAGAATGGCAAAAGGAACTTTACAAGAATATC
22909	FAN1	626	270.11661341853	265	NM_001146096	GGGGATCTTGGGTGACAGGGCACCGAGGGAAGGAGGACGCGAGGGCAGCCAGGCCCTAGGGAGCAGGGAGAGTGGCTCGGGCTCAGTCGCGTGGCCCCAGGTGCGCGTCCCAGGAAGAAGAAATTGTCGAGACGAATAACATGAGGTCATATAGAATCCCACTTTTGGTGATTTCAAGTCAAGAAAGTAAAAGTAAACCATTGCTATCTTTCACCTTAAATATCCTGTGTTTTATTGCTCAGAACATCCAGTTTTTCTAATACTC
4123	MAN2C1	68	17.794117647059	17	NM_001256495	GGAGCGAGAGCCCGGCG
3556	IL1RAP	560	258.780357142857	265	NM_001167931	GGAGCCCCAAAGGGGGAAAAGAAAGTGCGGCGGAAAGTAAGAGGCTCACTGGGGAAGACTGCCGGGATCCAGGTCTCCGGGGTCCGCTTTGGCCAGAGGCGCGGAAGGAAGCAGTGCCCGGCGACACTGCACCCATCCCGGCTGCTTTTGCTGCGCCCTCTCAGCTTCCCAAGAAAGGCATCGTCATGTGATCATCACCTAAGAACTAGAACATCAGCAGGCCCTAGAAGCCTCACTCTTGCCCCTCCCTTTAATATCTCAAAGG
57590	WDFY1	457	22.210065645514	14	NM_020830	GTCGCCGCGCGAAC
27000	DNAJC2	311	131.418006430868	118	NM_001129887	GGGCGTCTTAGAGCCAAGGCGCGAGGCTCGGAGTGAGAGGTAGAGCTGGAGGGGACCCTAAGCGCCCTCCGCCCGGGACGTGAGCCGCTGCGCCCACCGGGCTAGACCCGGCGCCATC
832	CAPZB	915;915	78.296174863388;78.296174863388	81;81	NM_004930;NM_001206540	GGGGAAGTGGAAGCGCCGGGCCCTGCTGCGGGGGGGAGAGCCACTGACGCCGGGACCGGGACCGCCGCCGCCGCCGCCACC;GGGGAAGTGGAAGCGCCGGGCCCTGCTGCGGGGGGGAGAGCCACTGACGCCGGGACCGGGACCGCCGCCGCCGCCGCCACC
1017	CDK2	7607	210.791902195346	210	NM_001798	GGCGGTCGGGAACTCGGTGGGAGGCGGCAACATTGTTTCAAGTTGGCCAAATTGACAAGAGCGAGAGGTATACTGCGTTCCATCCCGACCCGGGGCCACGGTACTGGGCCCTGTTTCCCCCTCCTCGGCCCCCGAGAGCCAGGGTCCGCCTTCTGCAGGGTTCCCAGGCCCCCGCTCCAGGGCCGGGCTGACCCGACTCGCTGGCGCTTC
6431	SRSF6	1517	139.44232036915	141	NM_006275	GCCATTGTGTGGCTGGACTCGGCCGCCCCTGTGGTGTGAGGCGCGTGTTCGGGCTCTTGCCGTCCCCGCACCCGCACCGCGGTTACTGGCTTGCGGTCCGCCGTTCGACAACCAGCCCTTGGGTCCCCGCCCGCCACGGAC
5529	PPP2R5E	4153	586.521550686251	582	NM_006246	GTGTGCCATGGACTCAGCCGCCCGGTGATATTGACAATAGGAGAGAGAAAGGGGCATTGACTGGGACCCACCGCGGGTAGCGAAAGGTGGCTCTGGCAGCGGCGGCTCCAGCTCCTGCGGCTCCTCCTCCTTATTCTGTCCCCTTCTCTTGCTGCCGCTGCAGATCCAGTCTTCCTCCCTCCCTTCCCCCCCTCCCCACGTCGTCGCCGCCGCCGCCGGGTCCGGGGCAACGAGCTGAGGCGCCGCCCGCCAGGAATGTGAGCGAGGAGCCACCGGCGGAGCCGCAACGGGGTCGGTGCCGATTTGATGGGACGGGCCCGCGGGGGAGGATCGTGAGGCCGCCGCCGCCACCGGAACGCTGAGGTTCGGGTCCGGCCGTGAGGCCTAGAGGCTCCGCCG…
3688	ITGB1	646	57.377708978328	55	NM_002211	GCGGAACAGCAGGCCCGAGCCCACCGCGCCGGGCCCCGGACGCCGCGCGGAAAAG
391356	PTRHD1	1219	15.7030352748154	14	NM_001013663	GCCCTGATCCCAAG
6574	SLC20A1	1903	459.539148712559	457	NM_005415	GGAGTGATGGCTGCCGGCGCTCTCTGCGTGGTTCTTCTTCTCGGCCGCTGAAACCCCCGCGGCTGCTTCCTGGGAAGGTCGTGAGTCCCGCTGAGCTGTCCCCGGTGCCGCCGACCCGGGCCGTGTGCCCGTGGCTCCAGCCGCTGTCGCCTCGATCTCCTCGTCTCCCGCTCCGCCCTCCCTTTTCCCTGGATGAACTTGCGTCCTTTCTCTTCTCCGCCATGGAATTCTGCTCCGTGCTTTTAGCCCTCCTGAGCCAAAGAAACCCCAGACAACAGATGCCCATACGCAGCGTATAGCAGTAACTCCCCAGCTCGGTTTCTGTGCCGTAGTTTACAGTATTTAATTTTATATAATATATATTATTTATTATAGCATTTTTGATACCTCATATTCTGT…
23216	TBC1D1	489	392.010224948875	392	NM_015173	CCTTCTCCTCCTCTTCTTCCTCCTCCTCCTCCTCCTCCTCTTCGGCTGCTGCTCCTGGTGCCGCCACCGTCCGCCGGTGCCTGTTGCTGCCGCCGCCGCGGGACCTGCTGTGTCCTCAGCTGGGTGGAGAAGAGGCGGGCGCCGAGCCGAGGGGAGCCCCCTCCCCGTCCCCCCGCGGCGGGAAGAGCGCAGCCAGCCGGGTGCGATGGACTCCCCGCCCGCCCAGGCCGTCCCCAGGATGCCCCCAAGCACCTGCGCGTCCCGGCCCGGCCCCGGGCTCTGAGCGCGCCGCGGCACAGGTTTCTGCATATGAAGTGTGTAAAATAGATTGCTTGATCCAAAACAGAAAAACAGTGATAACTGTTTTGCTGAGTTCCCAGACCCTTCCCAAG
7709	ZBTB17	576	427.706597222222	432	NM_001287604	GAGGTCGGTTCCGCCCGACTCTAACATGGCGGCGCCCTTTGTCTGCTCTGGAGTGCCGTCCCCGGCCTTCTCGCGGCCGTGATGCACCTCCCTCTGCGGTGGGGTCCGGGACATGGCAGGTAATGAGCCGGACGAGGGGAGCCAAGCTGGAGTTTACACAGGCAAACTGTCAGAAAAGAGTAGCCTGGGCTGTCTGGAAATCTGAGCCATGGACTTTCCCCAGCACAGCCAGCATGTCTTGGAACAGCTGAACCAGCAGCGGCAGCTGGGGCTTCTCTGTGACTGCACCTTTGTGGTGGACGGTGTTCACTTTAAGGCTCATAAAGCAGTGCTGGCGGCCTGCAGCGAGTACTTCAAGATGCTCTTCGTGGACCAGAAGGACGTGGTGCACCTGGACAT…
11319	ECD	1011	145.743818001978	135	NM_001135752	GTCGGGACAGAGCCTGATCCAGGCTTCGGCGGCCGGTGGCAGCTCTCGATCAGCTCTCGCAGTCGGAGAGGCGGCTAAGGAAAGGTGCCACAGCAGAGACGCGAAGGAGAGGCCCTAGAACCTTTTCAAAGAAGA
257415	FAM133B	409	87.1955990220049	93	NM_152789	GGGAGGCGGCAAGAGGACCTGCGGCAGGCCCTCTTCGGCAGTCTCTCCGGCCCGGTTTCCCTCGGCGTGCTACTGTGCGCTCGATCCAGCACC
53944	CSNK1G1	386	333.69689119171	323	NM_022048	AGAGAGAAACCACCGCTGCGGGTGGGTAGAGAAGCACTTGGCGCCTCGGGGAGGGGACCGCGCCCGCCTCATTTGCGCCTTGCAGCACTGCTGGACCAGGTTACAAGATGTTCACCTAAGATTGAGACCTAGTGACTACATTTCCTACGGGAACAAATAAATGGTTTTTCATCTCCCGGAGATACATTACAAACAAATATGGTGCTAAAAGAACTCCTTACCTTTCTCTGACTACAATTTATTTGGACATACTTTTGTATTGAAGAGAGGTATACATACTGAAGCTACTTGCTGTACTATAGGAGACTCTGTCCTGTAGGATC
286144	TRIQK	583;583;530;583;583	424.862778730703;110.862778730703;465.524528301887;265.862778730703;266.862778730703	422;108;466;263;264	NM_001171796;NM_001171799;NM_001191035;NM_001171798;NM_001171795	GCCCCTGCCCCTGAGTGACAGAACCGTGGACAGCAACATTTCCCACAGGACACGAAGTTTGTCGGCCCTTGCCTTGGCAGAGCTGAGTAAGAAAAATCACCAAGAATATTATTTTTGGTATTTGGAATTGAATTTGCCAGGAATGCAAGCACTGCTACCTAACTAAAGACCTTGGCTTTGGAAACATCTTACCCCTTGGCAGCTCTCCAGAGTTTAGACTTGGCAGCATCAAAGACACAACGCAAGCAATATGAAACAGAAAAACAAGTTGGTTGGATAGCTGTCCTCCATGCAGTCATTCATGATCCAGGCTGTCATCATCTTCATCACTCATGTTCAGAGTTACCCTAGAGGTCATCTCCATTTCATCCAGATAAATGAGTATGCAAGGAACGTTTT…
672	BRCA1	379;379;379;379	112.007915567282;106.007915567282;193.007915567282;112.007915567282	110;104;191;110	NM_007294;NM_007299;NM_007297;NM_007300	GAGACTTCCTGGACGGGGGACAGGCTGTGGGGTTTCTCAGATAACTGGGCCCCTGCGCTCAGGAGGCCTTCACCCTCTGCTCTGGGTAAAGTTCATTGGAACAGAAAGAA;GAGACTTCCTGGACGGGGGACAGGCTGTGGGGTTTCTCAGATAACTGGGCCCCTGCGCTCAGGAGGCCTTCACCCTCTGCTCTGGTTCATTGGAACAGAAAGAA;GAGACTTCCTGGACGGGGGACAGGCTGTGGGGTTTCTCAGATAACTGGGCCCCTGCGCTCAGGAGGCCTTCACCCTCTGCTCTGGTTCATTGGAACAGAAAGAAATGGATTTATCTGCTCTTCGCGTTGAAGAAGTACAAAATGTCATTAATGCTATGCAGAAAATCTTAGAGTGTCCCATCT…
55334	SLC39A9	151;2653;2653	429.46357615894;676.316622691293;676.316622691293	479;678;678	NM_001252152;NM_001252148;NM_018375	GGATCATAGAGGCACAGTCACTTCCGGCAGCTAGAGCAGCTACTGACTCTGTTTCAGCCATCTTCGATAAAGGCAAAAAGGAACGACTGAAGCTGGTGACTGTTTTGGGTGCTGGCCTTCTCTGTGGAACTGCTCTGGCAGTCATCGTGCCTGAAGGAGTACATGCCCTTTATGAAGATATTCTTGAGGGTGTTGAGAATAATAGGCAGTCAGAAGGTCTGCATGCCAAAGGCAGAAGACATTTGGGAATTTTTTCATCATGAACTTTAAGTTGAAGGAGTTAATGATTGGCTGGATTACAATATAAAAAGTGGATGTCTTTACAGTAAAGAAAACACCACCAAGCAAGTGAAACACATAATGTGATTGCATCAGACAAAGCAGCAGAAAAATCAGTTG…
64779	MTHFSD	427;427;420;427	28.882903981265;28.882903981265;84.9976190476191;28.882903981265	29;29;85;29	NM_001159378;NM_022764;NM_001159380;NM_001159379	GGGAAGCGTCGCACAGCGACTGCATCACC;GGGAAGCGTCGCACAGCGACTGCATCACC;GGGAAGCGTCGCACAGCGACTGCATCACCATGGAGCCGAGGTAGGTGTCTCCAAACAGGACATACGTGAACAAATTTGGGGCTAC;GGGAAGCGTCGCACAGCGACTGCATCACC
55179	FAIM	1440	517.855555555556	528	NM_001033030	GACAAACAGTCGGCGCGTTTGGTACTCGCGCCTGCAGAGCTTTCAACCTCCGCGCCGGCTGCGCCTGTTTCTCGGCCAGGGGAGCAAGGCCACGCGGCCTACGCAGCCGAGTCGGAACCAACCGGTTGTTTGGTGAAACCTACCCCAGAGCCTCCCGCGGCCCACAGAGCACAGACAGAATCTCCCTCTGTCACCCAGGCTGGAGTGCAGTGGCATGATCTCGGCTCACTGCAACCTCCACCTCCCGGGTTCAAGCGATTCTTGTGCCTCAGCCTCCGGAGTAGCTGGGATTTACAGACGTGCGCTACCATGCCCGGCAAATTTTTCTATTTTTGCAAAGACAGGATTTCACCGTTTTGTCCAGGCTGGTCTTGAACTATTGACCTCAAGTGATCCGAC…
57862	ZNF410	1704	216.721830985916	206	NM_001242924	GTGTGTGGACGGAATTCGGGACCGACTGACGGCCGGCCGGCTTCCCGGAACTGGAAGGTTACATTGATTACCCACCTAGTACAACATCTTACGGGAAGAGCATAGTATTTCCTAGAGGAATATGAACATAACAGGAAGGTATCATTGGCTCTGAATTAAATTTGAACTTGTCCCCTGAATAGCTACAGGTTTTGGAAGCTGAATCA
4140	MARK3	57	288.157894736842	53	NM_001128918	GCTGTGCTGTTTTGTTTTGACCCTCGCATTGTGCAGAATTAAAGTGCAGTAAA
80328	ULBP2	728	60.7513736263736	47	NM_025217	GGCTCTCCTTCCATCAAGTCTCTCCTCCCTAGCGCTCTGGGTCCTTA
348995	NUP43	203	17.827586206897	9	NM_198887	GCTTTCGGC
130752	MDH1B	390	356.002564102564	356	NM_001039845	CAGGAGCAGCCATGACAGCTTCCCCGAGAAGCTGCGCTTCTCACGAGATCTTACGGATTCCCTCAAAGGTCAAAAAGCATATGTTCGCGGCTGTAGCTGAAGGACTTACTTGAAGAAAGTTTACCAAGGAGAATGACTAATTTCCCTGCATACAGGAGTGGGGCTCGGGGATACCACAGAGCTTATAAGGGCGATGTTTGATCGTGTATCGCAACGTAACCCATTCAGGTCCTAACTTTAAACACCTAACCTCTGCTGGGCGCCAGACTTTGTAGTGCGCCTGCGCCTTGCCCTTGGCTGCGTGGTTGCCAGGAAACCGCGAAGCCGCGGTCCCTGCCTCTGAGTCTCTCTCGACC
54552	GNL3L	1447	224.342778161714	233	NM_001184819	GCGCGAGAGTTTCTGCTCGCTCAACCGAGTTGTCGTGTTGCCCTCGCTTCTCAGATCCCCGCCGGAAGTGTAAGTAAGAAACTTCTCTCCTCTTTTCTCACAATGTGCGCTCACCTAGACGGCCGGGCAGTTAGGATCGTCTATTGGATGTGAAACCAGAGATGCCCGCCAACCTGGAATAGAGAGGAAGAGAGCAAGCAGATTTGAACCTATCTGCTTTCAAGCTGGTCATC
5147	PDE6D	211	171.616113744076	169	NM_002601	GATCAGAAGCGGGAGCTGAGGGGAGAGAGAGGCCGGTCCTGGTCTGGCCGCTGCGGCTGCTAGCCCGAGGTCTCCAAGCCGGGCTGCGGCTCCATCCTCGGCTCCTGGGCACCGTCTGCGAGGCTCCGCCGACCAGAGTGAGAAAGCCGCGGGCGGCGACCGCCGCATC
4061	LY6E	2176	117.542738970588	110	NM_001127213	AGAGCGCGCGAGGTTCGGGGAGCTCGGCCAGGCTGCTGGTACCTGCGTCCGCCCGGCGGACAGGCTGCTTTGGTTTGTGACCTCCAGGCAGGACGGCCATCCTCTCCAGA
6733	SRPK2	100	73.99	62	NM_182692	AGCTCGTCTCGGCGCCCGCGTCGCCGTCGCGAAGCCCCCCGCCCCGCTTCCGCCGCGTCGGA
81844	TRIM56	73	281.794520547945	289	NM_030961	GGACGGAAGTTGCACCACAAGTACAATTAGTTTCAGTTTTGTTTCTTTTCCAGGCACCCAGCAACGGCGGCCTCCAGGCCTCAGGCCCCCTCACCATCCTAGAGGTCAAGATCAGCTCTGGCTAGTTCTCACAGGTCTGACCCAACAAGTAGCACTGACATTTTTACGTTTGCTGGATGTACACACGGAAGTGGAGGAGGAGGAGGAGAAGGAGGAGGGCAGCTCCTTAGCTCAAGAGCAAGTGGCCCAAGGCCTCAGAAGACTAGAAGGAAGTTCCTGGCCATTCAGC
84062	DTNBP1	148	75.986486486486	80	NM_001271669	GGTTGGCGGCGTGGGACCCAGGGGGCGACAGAGGCAGCAGCAGCCCGAGGCCTGAGGAGAGGAGACCGGCGGCGGCGGCA
55871	CBWD1	9444	267.196209233376	265	NM_001145355	GCGGTACGGCGTGTTGGTCCCAGCGGTTCAGCTGAGGTAGGGACGTGCTGTAGGCCGGAATGTTACCGGCTGTTGGATCTGCGGATGAGGAGGAGGATCCTGCGGAGGAGGATTGTCCTGAATTGGTTCCCATTGAGACGACGCAAAGCGAGGAGGAGGAAAAGTCTGGCCTCGGCGCCAAGATCCCAGTCACAATTATCACCGGGTATTTAGTTATTCAGAGGCTGCTCTGCTGAGAAGATGAACAAATTTCTTGTCCAAAACA
93974	ATPIF1	11176	45.020311381532	57	NM_016311	GCGTAACGAGAGACTGCTTGCTGCGGCAGAGACGCCAGAGGTGCAGCTCCAGCAGCA
2263	FGFR2	77	335	335	NM_001144919	GCCCGCGCTCCTCCGCAGCCTGGGGTACGCGTGAAGCCCGGGAGGCTTGGCGCCGGCGAAGACCCAAGGACCACTCTTCTGCGTTTGGAGTTGCTCCCCGCAACCCCGGGCTCGTCGCTTTCTCCATCCCGACCCACGCGGGGCGCGGGGACAACACAGGTCGCGGAGGAGCGTTGCCATTCAAGTGACTGCAGCAGCAGCGGCAGCGCCTCGGTTCCTGAGCCCACCGCAGGCTGAAGGCATTGCGCGTAGTCCATGCCCGTAGAGGAAGTGTGCAGATGGGATTAACGTCCACATGGAGATATGGAAGAGGACCGGGGATTGGTACCGTAACC
5660	PSAP	6948	73.495826137018	74	NM_001042465	GGGGCAGGGCAGATTTATATCTGCGGGGGATCAGCTGACGCTCCGCATTGCAGACTGCGGAGTCAGACGGCGCT
22980	TCF25	17458	58.759250773284	54	NM_014972	GAGTTTTCTGCGCTTCCTTCTCCCTCTCTCCAGACGTCGTGGTCGTTCGGTCCT
7692	ZNF133	341	100.093841642229	84	NM_001083330	GGCGCCCCGCTGGAGGAGCTCCCCAGCTGGTGGCTGGAGCGACCCCTTGTTCTTTGGTGGCGCTGTTTTGTGTTACAGGCACAC
56138	PCDHA11	1212	147.25825082508	147	NM_018902	ATACAAAGGAACTCCATCATACCGGATGCCACCGTTTAAGGATCCTTTGAAACTTCTTAAGAATTCAACGAGATTTTTAACCTGAAACTGAAGAATCTGGTACTGTAAGTGTAAAGAAGCTTATTTTGGAAGCCAATTTCGTATGCG
125893	ZNF816	63	177.333333333333	184	NM_001202456	TGGCACAGACCCGGAAGCGGATGGCGTGGACTGAAAGTTGCACGGCGGCGTGTGCGTTTCCTAGTTGTCTGGTGCTGCTATATAGGGGACGTGGGGTCCCCACAGACCTGCAGGTTCCGGCCCCTCTTTTCTCAACCCAGAGCAAATTGAAACGTCCGGGTGAGAGTCCGATTTCCAAAGACTC
10180	RBM6	207	238.057971014493	247	NM_001167582	AGGCAGCGGCGCGGCGCCTTTGTGGTAGCAGTGGCCCCGCGCGGAGGAAGTTCCGGTGTCCGCGGCGCTGGGTCGGTGGCGGAGGCTGAGGAGAAGGAGGAGCGGGCCGTGGAGGCTTCGCCGCCTAGGTACTGCTATAACCAGAATTTGGTAGAAAAAGGATTTACTTGTTGGGGCCCTCTTGATAAAAAGAGATGTGGGGGGATTCTCGACCTGCTAACAGAACTGGACCTTTTCGGGAACTCTA
55229	PANK4	1174	15.7776831345826	13	NM_018216	GGGCACTTTCAAA
84292	WDR83	69	53.666666666667	44	NM_032332	CCGTACAGACCGATTTAAGGCTGCAAGGAAGGAGTCCTGGGAGC
84619	ZGPAT	208	71.504807692308	35	NM_181485	CTAGCCGCCCTGGTCCAGCGCCTCCCTCTCTCAGC
54987	C1orf123	739	43.4343707713126	33	NM_017887	GGCGGCAGCCAGCACCGGGCGGAGAGGGCTACC
2677	GGCX	386	51.39896373057	37	NM_000821	GCGGCAGCTGTGACCCACCTGCCTCCTCCGCAGAGCA
10059	DNM1L	249	77.855421686747	81	NM_001278465	GGAGGAAGGAGGCGAACTGTGGGCCCCGGCCCCATTCATTGCCGTGGCCGGCGGGCACTGGGGCCCCGTGTTTTCAGAGTC
57003	CCDC47	997	178.167502507523	177	NM_020198	GAGGCGCGGCGTGACTGAGCTACGGTTCTGGCTGCGTCCTAGAGGCATCCGGGGCAGTAAAACCGCTGCGATCGCGGAGGCGGCGGCCAGGCCGAGAGGCAGGCCGGGCAGGGGTGTCGGACGCAGGGCGCTGGGCCGGGTTTCGGCTTCGGCCACAGCTTTTTTTCTCAAGGTGCA
6118	RPA2	1706	118.221570926143	106	NM_002946	AGAGAAAAGTAGCCAGAGCGGCGCAGTGGCGGCCGCGTTCTGTGGTTTTCCGCTATTCCCCCAGACCCGCACCTTCTCGGCCTCTTTGCGGAGAATCGTGACCAAG
5889	RAD51C	4578	47.480777632154	42	NM_002876	GTGCGGAGTTTGGCTGCTCCGGGGTTAGCAGGTGAGCCTGCG
5757	PTMA	138620	178.082462848074	181	NM_002823	CCCCACTGGCTGCTCTGAAAAGCCATCTTTGCATTGTTCCTCATCCGCCTCCTTGCTCGCCGCAGCCGCCTCCGCCGCGCGCCTCCTCCGCCGCCGCGGACTCCGGCAGCTTTATCGCCAGAGTCCCTGAACTCTCGCTTTCTTTTTAATCCCCTGCATCGGATCACCGGCGTGCCCCACC
11269	DDX19B	4458;52;4458;4458	114.991700314042;409;114.991700314042;338.991700314042	126;409;126;350	NM_007242;NM_001257174;NM_001014451;NM_001014449	GCCGCTTCCGGTCTGCAGCCTTGTAGTGGGGCTGGAGCAGAGCCTGCCGCGAACCCCCGGAGCCCACGATCCCTCGTGCCATCCCTCGAATCCACCAGCACGAGCGTCCCACCCGCGCCTGGGACC;GCCCCCGGCTCCCGGAGGTCGACATTTTGGTTTCCATAGGCAAAGTCCTAACACCACAATTGACATAGTTAAAAAGGGGAGACGGTAACGTGTTTGGTAGAGGTTACATATCTTGCTATAGTTGTTTATTTTAGTTGCTGAGTGATACACAGCCCTCAAAGAGTCTGACATTGTGCCCATGGTTACACTTGTCCGGGGGAGACCTTGAATTTGGTGTGGAAGAAATAACATCAGTAGTTCAGAGGACAGAGCTGCCCAGTCCTTACTCAACA…
25941	TPGS2	510	17.511764705882	3	NM_001271955	GCC
578	BAK1	1020	233.18137254902	256	NM_001188	GATTGGAGCCGGGTGCCGCTGGCACCTCTATGATCACTGGAGTCTCGCGGGTCCCTCGGGCTGCACAGGGACAAGTAAAGGCTACATCCAGATGCCGGGAATGCACTGACGCCCATTCCTGGAAACTGGGCTCCCACTCAGCCCCTGGGAGCAGCAGCCGCCAGCCCCTCGGGACCTCCATCTCCACCCTGCTGAGCCACCCGGGTTGGGCCAGGATCCCGGCAGGCTGATCCCGTCCTCCACTGAGACCTGAAAA
7593	MZF1	1278;1278	491.805946791862;491.805946791862	535;535	NM_001267033;NM_198055	GACTACATCTGCCGGAAAGCATCGGGCCAAGCCTTTCTCCATTTTGCGGTCTAGGAAGTAGCAGAGGCCCCTTCCTGTAGGGAGTTGCCATGGAGACGCGGTGGGGCACCGACGGAGTTCTAATGACGGCCGTGATTGGTGCAGGATCCTGCTAATCTCAGGAAGGCCCGTAGAGAAGTGAGGAAAACGTGGTGGGGGGCATGCGCGATCTGGTAGGCGGTGCTGCCGTCTGTTGTACCTGAGAGGCTTGCGCATGCCGACGCACGGATTCGAGGCGGGGAGCATGGGAAGAAGCGGCCAGGAGTATGACCTGATCATTGCGACCACCGCTAGGGGAAGGGAGGAGAGGGTGTAGAAACGGGGACGAGGGTGGGGGAAGGGCAAGGAGGCGCTCGAGCT…
51001	MTERF3	599	104.781302170284	106	NM_001286643	GAGGAGCCGGCGTGCGGCGCGGCGGGACGGGACGTGCGGCCCAGCGAGTTGGTCGGTCCCGGGGTCACCCGCTACGGGAAGCAGGCCTCGCCACAGACTAAGAAAA
54930	HAUS4	636	205.64465408805	197	NM_001166269	CTTTCAGCTTGGTCTTTCCGGGCCTCGCTTCCCCCAGCCCCTGCGCCCGGCCCGAACGAGAGGTTCCGGAGCCCCGGCGCGGGCGGGTTCTGGGGTGTAGACGCTGCTGGCCAGCCCGCCCCAGCCGAGGTTCTCGGCACCGCCTTGAGAGCTTCAGCTGCCCCAGGGTGTGCAGATTAGAATCCCAAGAAAATCAA
55937	APOM	1464	314.84631147541	320	NM_001256169	CACACACACACACACACACACACACACCCACCACCCCGCGGCTCCGCCCCCGACTTCCCCACGGACCGTCACTTCCGGTCTCCCCCAAACCTGCCACCGACGGCCACTTCCGTTTCCCCGATAGTATTTGGGGATCTCGAAGCGATACTTCCGGCTCCCCCCAGGTCCCCAAGCTTTACTTTTGTGGGGCACGACGAGAAAGTCCGCAGCCCCAAACATTCCCAGAGGTCCACTTGGGCCAGTGGTACTTTATCGCAGGGGCAGCTCCCACCAAGGAGGAGTTGGCAACTTTTGACCCTGTGGACAACATTGTCTTCAAT
8864	PER2	64	207.84375	213	NM_022817	GCCGCCGGAAGTTCCTTGGGCTGCTGGACTCCTCGGCTTGAAACGGCGCCGGCGTGGGGGCGTGTGCCCTTGGCCCTGTCCCAGGTGGAGAGTGGTCGAGCCGCGCGCAGGGTGCGCTCGTTTGAACTGCGGTGACACCGAGGGTTGGGGACTCGAACCCCCGCTTCGCAGCTCAGGAGCCTGAGGTCCGAAAGCTTCGTTCCAGAGCCCAGC
80195	TMEM254	530	32.730188679245	35	NM_001270370	GTCCTGAAGCGCGCTCCCGGGGAGGTGTTGCAGCC
93183	PIGM	1150	180.610434782609	272	NM_145167	GCCTCCGCTGGAAGAAGAAGCGGAAGCGAGACCGTCCATCCAGAGGAAGGCAAGTTTTTGGCTCGGGCGGCTGAGAAGACCGCGCGGGGCTGGAGACAGGTAGCAGTACGGGGGCGGGGCTTCATGCCGGATGTGATAGTCTGCAGTCGTTTCGGTTGGCAGCCTGGCGGGTGGGAGATGCGGCGGCCACCTGCTGCAAAGAACCGAAGGGAAGGTTAGAAGTACGAAGGCAGTTTGGAGCTGGGGCTAAGCAGCTGTCGCACGGTCAGATC
435	ASL	143	144.811188811189	149	NM_001024946	CCCCAAGGGCTGCGCTCCCTCAAGCGCAGTGCCCAGAACTCGGAGCCAGCCCGGCCCGGGGGACCCTGCTGGCCAAGGAGGTCGTCAGTCCGGTCTTGTCTTCCAGACCCGGAGGACCGAAGCTTCCGGACGACGAGGAACCGCCCAAC
5238	PGM3	62;62	86.838709677419;86.838709677419	89;89	NM_015599;NM_001199919	GCGGTTCTGAGGACTGGGTTTGGGTGCAGACGTTGTTGCTTGGGCGCTTCTCCGCTGCGTGTAGGTGAAGGGGGCTTCCTGACCGAGAC;GCGGTTCTGAGGACTGGGTTTGGGTGCAGACGTTGTTGCTTGGGCGCTTCTCCGCTGCGTGTAGGTGAAGGGGGCTTCCTGACCGAGAC
276	AMY1A	718	149.587743732591	148	NM_004038	TCCAAGCCATAGGACCCAGTTTCCTTTCTTAGCTTACGTTATCTACCAGAGCACCGTGGGCTGTTACTTGCCTTGAGTTGGAAGCGGTTCGCATTTATACCGGAATATAAATAGTTTCTGGAAAGGACACTGACAACTTCAAAGCAAA
113878	DTX2	793	380.291298865069	366	NM_001102594	GCCTTCTCCTGAGAGTCGGAGCCACAGCCAGAGCCCTGCCCAGGCCGAGCCGGAGCTGCAGCCCGAGCGCGGTGGTGCCCTCAGCCCCGTCCTCTTGTCCTCCTCAGCCTCGGTGCCTTGGAATTTGTGTCGCTGAGTCAGCAAGCCTTTCAGATTTGCCCGGTTTTTGTTGTTTGTGGTTTGTATCAAGATGGGAACTCAAACAAGTCATTCCTCCTAAGGAGCTGGTGTCTTCATCCAGAAGGGACAGTTTGTGCCAGCTCTCCAGAGAGAAAAGATCTGCCGGAGGCGCTGGGCAATGACCCCGGGACTCCAGGCCAGAGGGGTCTGAAGCTGTTTGGGAAAGCAGCGGGACTCCTTGGGAAG
3692	EIF6	589	162.658743633277	252	NM_181468	TTACTGGTTACTTGGTAAGCTGGTGTGAGGGGAACCTGGGAGGGTCAGCTCCGGTCCTGGGTCGGGAGGGGTGGGGGCCAGAGGATTCAGGGCCGGAGGTTCTGGTGGGGGCCCAGTGGGCGGGACCCGAGGACGGAGGGGCCGGGAGGCCGAGAGGGGCGGGGTCGCGGCGGGGCCTGAGGGACGGAGGCCGGGATACTTGGGAAAGGATCCGCCGGCCTTGAACTCCCGCCTCCGCCGCCCCTAGGCCTC
51021	MRPS16	1724	151.787122969838	152	NM_016065	GGAGTCGAGGTTTTCGGGCTTGTACCGCTTGGCGGTGCGGCCTGGTGTCGGCTTGCAGGTTCTTTCTGTGTTTGTTCTCTGCCCTGCCAAGGCCGTAGAGCTGGTGCGTGCGGGTAGCGGGGCTCTCCGAGGAGCCGCACGCCGGCGGCACC
6812	STXBP1	428	86	86	NM_001032221	GGCCCAGCGCGCCCACCTGAGGAGGCGGCGGGGTCCGCAGGCGTCGCGGGACGAGGAGATCGGAGCCGGGAGACTCGCGCAGCGCC
64223	MLST8	109	133.467889908257	114	NM_022372	GACTCGCTCCGGCTCCCCTCGCCGTCCTGGACACGGCGGAGTGCGGAGCCGCCCGTAAGATGCTCTGACCTTTGACCCCTGCCGTTCAGCTCTAGGGCCCGTGCAGGCCACACC
7335	UBE2V1	14975	244.366210350584	262	NM_001257399	AAGCAAGAGCGACGCAAGATGGCAGCCACCACGGGCTCGGTAGAGACGGGGTTTCACCGTGTTAGCCAGGATGGTCTCGATCTCCTGACCTCGTGATCCGCCCGCCTCGGCCTCCCAAAGTGCTGGGATTATAGGCGTGAGCCACCGCGCCCAGCCAGGAGTAAAAGTCCCTCGCAATTTCCGACTGTTGGAAGAACTCGAAGAAGGCCAGAAAGGAGTAGGAGATGGCACAGTTAGCTGGGGTCTAGAAGATGACGAAGAC
153443	SRFBP1	651	55.6574500768049	58	NM_152546	GCGGTCTGAGAGACCGGTTCACGTGCAGGCAGCGGCGGATCATATTCCTTCATCTACC
83452	RAB33B	800	62.54625	111	NM_031296	GGAAGTTGCGCAGCCGAACTGGCCGGCTGGGCGCGCGCTCTTGCGGTGGCGTAATCTCTCAGCCTTTCTGTGTCTCCTTTCCTCCGCCTCAGTTTGGGGCGGGTCGGGGGA
1314	COPA	2117	148.494095418044	81	NM_004371	GGTCGCTGACGTGGAGGCGTCCGAAGGGCAGCAGGGTGTGTCGGGGCTCGGATTAAGACATCGGAGTCGGAGACCTGAGAG
253782	CERS6	220	43.745454545455	39	NM_203463	GGGCTGCGGGTGCCGCAGGACAGGAGTGGACAAAGCAAG
10179	RBM7	170	266.582352941176	257	NM_001286047	GCAGTGGGTGCGTCGGCCACGACCTTTTGGCCAGGTTAGGGAGGGGGCGACGCTGAGATGGGGGCGGCGGCGGCGGAAGCGGATCGCACTCTCTTTGTGGGCAACCTTGAAACGAAAGTGACCGAGGAGCTCCTTTTCGAGCTTTTCCACCAGGAAGTAGTCATGCCCCACAAGATGTCAGTTTGTCATATCCCCAACATCATGTTGGAAATTCAAGCCCTACCTCCACATCTCCTAGCAGCAGGTACGAAAGGACT
374969	CCDC23	456	162.008771929825	171	NM_199342	GGCCCCGCCCAGGACGAGGGGCGGTGGGCAGGCAGCGCTGGGTCCAGTGGTCGGGGGAAGGCGAGGATTACCCTCCCGGAGGCGTTGTCTGCGACTCGGCGGAGGCTCCAACTTCCAGTGGCCCGGTCGGGAAAGATCAGAGCCTCCTAAGAAATATCCAGAAGTCAAGCC
84818	IL17RC	516;516;516;516;516;516	182.158914728682;182.158914728682;182.158914728682;182.158914728682;182.158914728682;182.158914728682	179;179;179;179;179;179	NM_153460;NM_001203263;NM_001203265;NM_032732;NM_001203264;NM_153461	AGGACTCCCAGGACAGAGAGTGCACAAACTACCCAGCACAGCCCCCTCCGCCCCCTCTGGAGGCTGAAGAGGGATTCCAGCCCCTGCCACCCACAGACACGGGCTGACTGGGGTGTCTGCCCCCCTTGGGGGGGGGCAGCACAGGGCCTCAGGCCTGGGTGCCACCTGGCACCTAGAAG;AGGACTCCCAGGACAGAGAGTGCACAAACTACCCAGCACAGCCCCCTCCGCCCCCTCTGGAGGCTGAAGAGGGATTCCAGCCCCTGCCACCCACAGACACGGGCTGACTGGGGTGTCTGCCCCCCTTGGGGGGGGGCAGCACAGGGCCTCAGGCCTGGGTGCCACCTGGCACCTAGAAG;AGGACTCCCAGGACAGAGAGTGCACAAACTACCCAGCAC…
3295	HSD17B4	2847;2847;2847;2847;2847	205.212504390587;667.212504390587;246.212504390587;68.212504390587;68.212504390587	209;671;250;72;72	NM_001292027;NM_001292028;NM_001199291;NM_000414;NM_001199292	GCCTCCTCCTGTCCCGCAGTCGGCGTCCAGCGGCTCTGCTTGTTCGTGTGTGTGTCGTTGCAGGCCTTATTCATGGGCTCACCGCTGAGGTTCGACGGGCGGGTGGTACTGGTCACCGGCGCGGGGGCAGGATTGGGCCGAGCCTATGCCCTGGCTTTTGCAGAAAGAGGAGCGTTAGTTGTTGCTTTCAAAATCTATGCAATAACCCT;GCCTCCTCCTGTCCCGCAGTCGGCGTCCAGCGGCTCTGCTTGTTCGTGTGTGTGTCGTTGCAGGCCTTATTCATGGGCTCACCGCTGAGGTTCGACGGGCGGGTGGTACTGGTCACCGGCGCGGGGGCAGGTGAGCATGCGAAGGTTGGAGGCCGCGCCCCTTGCTGAGGCGCAGCTGGCTGCTCTTTT…
27158	NDOR1	1462	74.006155950752	78	NM_014434	GGAGCGGTCCCTGCAACCCGGCCGGCGGGAACTGCCTTCTAGTTTTTAGTCTCAGACCAGACCACCGGGCGCACCCCG
157574	FBXO16	69	117.304347826087	118	NM_172366	GGGAGGGGTGAGGGACTGGAGGGAGTCGGAGAAAAAGCTGACCTAATGAAACTGTGGCAACGTCAGCGCTTGAGGCTTGAAGAGGGAGACAAGCTAAAAGAGGATATCCAGTTGTTTC
10795	ZNF268	56;56;56;56;56;56;56;56;56	215.571428571429;156.571428571429;215.571428571429;215.571428571429;215.571428571429;412.571428571429;215.571428571429;215.571428571429;215.571428571429	215;156;215;215;215;412;215;215;215	NM_152943;NM_001165881;NM_003415;NM_001165887;NM_001165885;NM_001165882;NM_001165886;NM_001165883;NM_001165884	GATGGCGAGATCCTTGTTCCTCAGATAGCGTTCATCGCCCGTCGTGGTCAACGGGCCAGCCGAGTCTGGAGTGGTTGCGAACCCTTCTGGCTGCAGATCTGGAGGTGGAGGCAGTACCCTGGACTCTATTCTGCTGCCCCTTCAGGGTTTGGAGGAGCCGGAGCATCCCTCGCGTCCTGTCACTTCCAGCGAGGCACACAAAACTGACCGTAGGG;GATGGCGAGATCCTTGTTCCTCAGATAGCGTTCATCGCCCGTCGTGGTCAACGGGCCAGCCGAGTCTGGAGTGGTTGCGAACCCTTCTGGCTGCAGATCTGGAGCATCCCTCGCGTCCTGTCACTTCCAGCGAGGCACACAAAACTGACCGTAGGG;GATGGCGAGATCCTTGTTCCTCAGAT…
1316	KLF6	149	204.93288590604	195	NM_001300	GCAGTCAGTCCGGTGTTTGCAAATATTGTGTGGGCTCCGCGCGCTGCGGGCTGCGGGAGGGTCCGGCCGGGCGTCTCTGCGAGCCTGGAGTTTGCATGAAACTTTCACCTGCGCTCCGGGGAGACTTTCGGCTCCGGCTCCCACCGCGCGCCTCGCCGCCCTCGCGACCGCGGGCTCCGTCCAACCCGGCCCGAC
654364	NME1-NME2	10525	98.349928741093	108	NM_001018136	GCAGAAGCGTTCCGTGCGTGCAAGTGCTGCGAACCACGTGGGTCCCGGGCGCGTTTCGGGTGCTGGCGGCTGCAGCCGGAGTTCAAACCTAAGCAGCTGGAAGGAACC
151473	SLC16A14	1507	367.356337093563	384	NM_152527	AGAATTAGCCGGTATAGGAATGAACGAGCATGAAGATTTGAAATTGCTCCGATTGGAAGGAAGCCCAGGTTAGGTTTGGGCACCTCCAAACGCACCCGTTTTAAAGCCACCTGGACTGAGGCGTCGAGCTTTCAGCTCCACCAAACGCTCACCTGGCCTGGCAGCGAGCGGCGGAAGAGCCCGGGAGCCCCTCACAGAGCGCACCGAGCCGGGCGGAGAGCTGAGCCGCAGGCACCCGCGTCTCCAGGATGATAGGCGACATTGCAACAAATCTCTACACCCAGCAGCTCAGGGGGCTCCAAGCAGAGCAGCAAGTTCGAGGATCCGGGCGTGGAGCCGAGTGAGGCCGCAGCCCAGCGGGCCTCGGGCGAAAAATCTTGGAAA
1622	DBI	4073;4073;3042;128;4073;4073;3059	144.156886815615;84.156886815615;253.111111111111;144;114.156886815615;149.156886815615;288.651193200392	135;75;264;144;105;140;301	NM_020548;NM_001178043;NM_001282635;NM_001178017;NM_001178042;NM_001282633;NM_001282636	AGTGCAATCTGGGCGATCGCTTCCTGGTCCTCGCCTCCTCCGCTGTCTCCCTGGAGTTCTTGCAAGTCGGCCAGGATGTCTCAGGTACAGCGCGTGCACAGCCAGGCTGCGAAGACCCTTGTCTGAGACCGAGCT;AGTGCAATCTGGGCGATCGCTTCCTGGTCCTCGCCTCCTCCGCTGTCTCCCTGGAGTTCTTGCAAGTCGGCCAGG;AGTGCAATCTGGGCGATCGCTTCCTGGTCCTCGCCTCCTCCGCTGTCTCCCTGGAGTTCTTGCAAGTCGGCCAGGATGTCTCAGGTACAGCGCGTGCACAGCCAGGCTGCGAAGGTGCAGCGGGCGGGAGGCCCGTTGGGGGCTCAGCCGGCTGCCAGAAGCTCTCGGGCTCTTTCCTTCCGTGCCC…
6804	STX1A	203	20.758620689655	15	NM_001165903	GCCACTCCCGGGAGC
146691	TOM1L2	1591	83.920175989943	87	NM_001033551	GTCAGTCAGGACGGGAGTCCGGCGGGTTACAGCGGAGGCCTAGGTGGCAGACAGGGGGCCCGGGCCGCTGCGTGTTGTCCACCCAAG
286075	ZNF707	172	346.116279069767	346	NM_001288809	CCGCTCGGGAAGTTTGTAAAAGTCTGGGCTACCGGCGCGGCGTAGTGGATGCAGCATCCTAGTGGAGGACGCCCCTGTGAGGCCCATCTCCAGACACAGCCACTCGGGGCTCTGGGCTTCAGTGAATGGATTTAGGGGACACAAACAATCAGTCCACCGCAGGGCCACTCCCATTCCCCCTTCCCACCCAGACCTGTGGGCTGAGCCTTCTTTTTCTTGGGAATGGCCTCTTCGGGAGCTGTGTGTGTTGCAGGAGCCAGTGACCTTCAGGGACGTGGCCATCTACTTCTCAAGGGAGGAGTGGGCGTGTCTGGAACCCAGCCAGAGGGCCCTCTACCGGGACGTG
25921	ZDHHC5	514	1147.03696498055	1144	NM_015457	CTCTGAGGCAGGACGGCACTGCCGGGAGGCGGCGGTGACAACGACGGCGGTGGTGACGGGCACCGGGCTCGCGGGTGAGACACAGTAACCTGGTTGAACTCTGCATCTGGAAAGCTGAAGACTGAAGAAAGATAAGAGACATTGACTAGTCTGGAAACAGGGACATCTTTGGAACTTCGTTTTCATCCACAGTAAACTTTTGAAGTGTCATCAATTGGAATTGATTTCTTCATCTTATTCTGCCTATTGGGAAGAACATGGCTTCAAGGATTTTAAGTTTCCCTTTAGTTTTACATGAACTTTGTAGGAAACAGAGCCCTTAAAGGGCTTGGGAATAACAAGAAGAGATTGAAGACAGAGAAGCTTGCCCTGTTTTCCTTGCCCCTTCAAAGAAAAGGA…
56898	BDH2	53	108.490566037736	100	NM_020139	GACTTGCTTCCAGACAAAGGTTGTCTCAAGTTTGTTGCTCAAACCGAGTTCTGGAGAACGCCATCAGCTCGCTGCTTAAAATTAAACCACAGGTTCCATT
3927	LASP1	5104	128.640478056426	133	NM_006148	GGCCAGTTCCCCAGCTCCAGCCGCCGTCGCTGCTGCCTGTGTAGTTGCAGCCGCGGCCGCCTCCCGCCAGCTCGCCTCGGGGAACAGGACGCGCGTGAGCTCAGGCGTCCCCGCCCCAGCTTTTCTCGGAACC
6820	SULT2B1	7980	81.303634085213	77	NM_177973	GCTGTCGCTGCGCACACCTGGCCTCTGTGCCGCCTGCTCCCTGCTCGTCCTCCCCTCCCCACCCTCACCCACCTGCC
5283	PIGH	114	57.5	65	NM_004569	GAGACGACCAGGGCCGGCGAGCGCAGTGCAGCGCCGCGCGGTGCGGGCGGCCGAGTGGGGGCGTC
7594	ZNF43	545;545;545;545;163	133.278899082569;228.278899082569;437.278899082569;700.278899082569;191.429447852761	131;226;435;698;181	NM_001256653;NM_001256651;NM_001256650;NM_001256648;NM_001256654	GTCTCCAGCTCCCGCTAGACCTTGGGACCCGCCTCTGCTTTTCCGCGTTCTCCAACTCGGGAATCCCCGGTGACTTTGTCGCAGCCTCCGTTACCCTGTGATCTGCAAGTCCTGGGAGACGCACAGCTAAG;GTCTCCAGCTCCCGCTAGACCTTGGGACCCGCCTCTGCTTTTCCGCGTTCTCCAACTCGGGAATCCCCGGTGACTTTGTCGCAGCCTCCGTTACCCTGTGATCTGCAAGTCCTGGGAGACGCACAGCTAAGATGCCCGGACATCCTGGAAGCTGGGAAATGGTATTGCTGTCTCTAAGCCAGACCTGATCACCTGTCTGGAGCAAGAAAAAGAGCCTTGGGAGCCT;GTCTCCAGCTCCCGCTAGACCTTGGGACCCGCCTCTGCTT…
9093	DNAJA3	2068	121.497582205029	118	NM_001286516	GGGCCAAGATGGCTGCGCGGTGCTCCACACGCTGGTTGCTGGTGGTTGTGGGGACCCCGCGGCTGCCGGCTATATCGGGTAGAGGGGCCCGGCCGCCCAGGGAGGGCGTGGTGGGGGC
283899	INO80E	1808	67.586836283186	61	NM_173618	ACGGCAGCCACTGCTTGGGGTAGCGGGAGGGCAGACTCTGGGCGCCACTCCCGGGCCGGTC
2235	FECH	831	25.569193742479	26	NM_000140	GGACTCGGGCCGAGGCTGCCCAGGCA
160857	CCDC122	604	314.754966887417	309	NM_144974	ACCTACCTCGCCGCGGCCGCACAGATTCCCCGCCTGATACCGTCCCAGGATCCCAGGGGAAACCTGACGGCCAGGTTCCCTCGTGCCAGCTGCCGGGAGGCGGGAGGGAGTGCCCTGAAACTCTAATCTCATTGCCTGGCCAGAAAAGGAAGTAATCCCTAGTGTCAGCAGATTCAGCGGTACTGGTGTATAATAGGATCACCAATATACAACAGGAAAAAACAAAAGTGAAAGATTATCAATATAGATTATTGAGTAGGAGTAAAGAAGGTAAATCAAAAAGGGGAAAAGAGATTACAGACACAGAAA
118	ADD1	896	109.018973214286	110	NM_014189	GGACGGGGGCGGAGCCGGAGCCGGAGCCGACGGGCGGTGGCCGCACTGGGACCCCGGAATCCCGCGCGCTGCCCACGATTCGCTTCTGAGGAACCTAGAAAGATTGTACA
6996	TDG	3605	176.010818307906	193	NM_003211	ACAGAAAGGGGGTCCGTGGGGGACGGTAGAAGCCTGGAGGAGGAGCTTGAGTCCAGCCACTGTCTGGGTACTGCCAGCCATCGGGCCCAGGTCTCTGGGGTTGTCTTACCGCAGTGAGTACCACGCGGTACTACAGAGACCGGCTGCCCGTGTGCCCGGCAGGTGGAGCCGCCCGCATCAGCGGCCTCGGGGA
22993	HMGXB3	159	553.440251572327	635	NM_014983	TCCGCCCGGGACCTCTGGCCGGAAGCAGTCCGTTCGCCTTACTAGACCCGCTCCAAGCCTTTGAGCAGTTCGTGTGGGTCCGCTCCCAAGCTAGGGCTGGGCTGTTGCGCTTGCGCCAGGGGTCGCATGCAGTCACGCGCTGCCGACCGCTTCCGGTGCGCCGCGAGGGCCGCCGGGACGGGTCTCCCTGGCGATCCGTGGTGTGCCGCTACTGCCGGTGCAGCCGCCAAACCGGTGCCTCGGTGACGACCGTGTCCCTGCCGTCTTCCTCGAGCTCCCCGGGGCTTGACCCCCGGGGCCCTCGGCAGGCATCGGTGAGGAGCCTGCGGAGCGAACCTGTGCTCCTATTCTTGCCCTTCAGGACCCCATATCGCGACTCCGAGGAGGGGAAGCGAGAGG…
22839	DLGAP4	1541	489.920830629461	516	NM_001042486	GTACAAAACCGGAGCCTCGGGCCGGGCTGCGTGAGGGAGGAGGGTTCATCATGCCTAGTGGCGTATAAGAAGACCCCGCCACCGGTCCCTCCACGCACCACTTCAAAGCCGTTCATCTCAGTCACAGTCCAGAGCAGTACTGAGTCTGCCCAGGACACCTACCTGGACAGCCAGGACCACAAGAGCGAGGTGACTAGCCAGTCGGGCCTGAGCAACTCGTCGGACAGCCTGGACAGCAGTACCCGACCGCCCAGCGTGACACGGGGTGGAGTCGCCCCAGCCCCTGAGGCCCCAGAGCCACCCCCAAAACATGCAGCTCTGAAAAGTGAACAAGGGACGCTGACCAGCTCTGAGTCCCACCCCGAGGCCGCCCCCAAAAGGAAACTGTCATCGATAGGA…
22845	DOLK	2390	366.165271966527	443	NM_014908	ACACGGCCCGCCGGCGGCCGCCGCCATCTTCGCGCGCCCGCTCGCCCTAACCCCGCCCCCAGACGCCATGCCCACGTGACCGCTCGCCCCCGGACCCGGAGCGTGGGCGGGGATTTCGTCACGTGACGTTGCCGCGGGGCGGTGCCAAGATGGCGAGGCCCAAAGAGGTGAGGAGCCGGCAGCGGGGGCGGCTGTAACTGTGAGGAAGGCTGCAGAGTGGCGACGTCTACGCCGTAGGTTGGAGGCTGTGGGGGGTGGCCGGGCGCCAGCTCCCAGGCCGCAGAAGTGACCTGCGGTGGAGTTCCCTCCTCGCTGCTGGAGAACGGAGGGAGAAGGTTGCTGGCCGGGTGAAAGTGCCTCCCTCTGCTTGACGGGGCTGAGGGGCCCGAAGTCTAGGGC…
6782	HSPA13	1374	62.363173216885	63	NM_006948	GAGGAGTGGGGGCGGTGCCTCACGTCTGGTACAGTCATCACAAGCCTGTTCGGCGGGACTGTG
637	BID	78	346.641025641026	365	NM_197967	AAGGAGGAAGCGGGTAGTCGACCGTGTCCGCGCGCCTGGGAGACGCTGCCTCGGCCCGGACGCGCCCGCGCCCCCGCGGCTGGAGGGTGGTCAACAACGGTTCCAGCCTCAGGGATGAGTGCATCACAAACCTACTGGTGTTTGGCTTCCTCCAAAGCTGTTCTGACAACAGCTTCCGCAGAGAGCTGGACGCACTGGGCCACGAGCTGCCAGTGCTGGCTCCCCAGTGGGAGGGCTACGATGAGCTGCAGACTGATGGCAACCGCAGCAGCCACTCCCGCTTGGGAAGAATAGAGGCAGATTCTGAAAGTCAAGAAGACATCATCCGGAATATTGCCAGGCACCTCGCCCAGGTCGGGGACAGC
10286	BCAS2	1325	29.505660377358	24	NM_005872	GCAGGCAAACCTGAGGTCCTCAGA
93627	TBCK	2502	335.05795363709	341	NM_001163437	GGGCGGAAGAAAAGGCCAGGCTGAGGGGAGGGTAGAGGGTGAAAAGCTCGGATCTGTGTTTGGGGAAGGCCAGGCTTGCGCTCCTCGCCGGGTTCCGCGAAGGTTAACCTTGGCTGACTTGGCTCGCGAGCAAAGGGCAGCGTCTGAGCTCCCGGCGTTCCAGGAGTGGCCTCTTTTGTAGGAGCACCTGAAATGCAGCGTCTGGTGCACTAAGCCGTAGCGGCAGCAGCAGCCACAGCGACAGCGCTGGGGCCCTGTGTAGAAGCTCCATCCCCCTTGTCTTTGTGCTTGCCTGCGTCCCCAGACTCAGAGATTATCTTAGAAGACCTAGGACTCCAAAA
147657	ZNF480	252	62	62	NM_001297624	ACCCGGAAGCGGATCGCGTGGAGTGAAGGTCACGCCGCGGCGCGATTGACTTCTAAAGAGTC
533	ATP6V0B	3970	60.95717884131	15	NM_001294333	GCCGCCGTCGCCGCC
10548	TM9SF1	2234	187.234109221128	113	NM_001014842	ACCGCGCCGCTGTGGGAGAGACCCCAGCAGGAGCCCAAAGGCAGCTACGGGGGCGCGAAGGCCGCTGGCGCCGCCTCGGCCAGCCCTTCCCGCGCGGTTCCACTGCCTTAAGG
1646	AKR1C2	3206;3206;3206	22.006238303182;22.006238303182;22.006238303182	22;22;22	NM_205845;NM_001135241;NM_001354	GCTAACCAGGCCAGTGACAGAA;GCTAACCAGGCCAGTGACAGAA;GCTAACCAGGCCAGTGACAGAA
79639	TMEM53	356	70.491573033708	53	NM_001300748	GCGCAAGCGGGAGTTCCGGCTGGAGACCCGTGCTCTGGGCCGGCGCCTTCACC
25912	C1orf43	15672	173.835630423686	162	NM_001297723	CTGTCCGCCATGTTTTCAGGCCGGGTCTGGCTTGGTCTTCCCCCGTAAGGAAATGGCCGGGGAGCTCCAGGGGACCCAGGCGCCGTCGCTTCGGCGGAGCCTGGGCTGACCAGCCAGGACAGCGGGGTAAACCCGAACAATTCTGCGCGAGGTAGGGAGGCC
11343	MGLL	75	223.253333333333	200	NM_007283	CCCGGAGAGCCTGCCGGTGGGAGCTGGAAGCAGGCTCCCGGCTGAGCGCCCCAGCCCGAAAGGCAGGGTCTGGGTGCGGGAAGAGGGCTCGGAGCTGCCTTCCTGCTGCCTTGGGGCCGCCCAGATGAGGGAACAGCCCGATTTGCCTGGTTCTGATTCTCCAGGCTGTCGTGGTTGTGGAATGCAAACGCCAGCACATA
51735	RAPGEF6	284	195.450704225352	193	NM_001164389	GTCTCCGGCCAGTCGCGCGTGGGTAGAGGCCTTAGGCGGGCGTTGCGAAGGGTTGTTTGCTAGAGTTCGGACCTTGTTACGGCGCGAAGTTCCCTCCTTGGGGCGGGGGAAAGGTACCGCACCCGCTACCTAGTGTGAATGAACTGTGGCGTGGGCTGCTAAGGGCAGGCTGCGGAGTACCCGGGCCGTGGCC
987	LRBA	188	301.457446808511	302	NM_001199282	GCCTTTTCCTGCCCTGGATCTCCGCCGCCACCTCGGTCTCGCTGCTCCTGGGCGGGGGGTGAGGACGAGTCCGGAGTATCTGGGGTTTGGCGTTGTTGTCAGCCTCGGGGAGAGAGATTGGACAAATATTCTCCAAGAGGAGGAGGGCGACGCCAAGGACTTTCCACATCAACTGCTTTGGGGTATCTCCACAAGTTGGAAGAGGGACCCTTTCGTTTTGCATTGCGTGTGTTGTGCTCATTACCAGTGCAGCGACTGCCGTCCCAGGGTGACTCTGAGTTGTCCTTTATCGTGAGCTAGCA
8266	UBL4A	1010	35.09900990099	31	NM_014235	GCCGGCCCGAGTGGACGCCGTCGCGACCGCC
79600	TCTN1	473;473;473;473;473	41.945031712474;297.945031712474;41.945031712474;41.945031712474;270.945031712474	51;307;51;51;280	NM_024549;NM_001173976;NM_001082537;NM_001082538;NM_001173975	GCCGGGCAACGCGCTGTCCATGTCGCGGGCCTCGCTGGGACTCCCTGGGAG;GCCGGGCAACGCGCTGTCCATGTCGCGGGCCTCGCTGGGACTCCCTGGGAGATGAGGCCGCGAGGTCTCCCGCCGCTCCTGGTGGTGCTCCTGGGCTGCTGGGCCTCCGTGAGCGCCCAGACCGATGCCACCCCGGCGGTGACGACAGAGGGCCTCAACTCCACCGAGGCAGCCCTGGCCACCTTCGGAACTTTCCCGTCGACCAGGCCCCCCGGGACTCCCAGGGCTCCAGGGCCCTCCTCCGGCCCCAGGCCTACCCCAGTCACGGACGGGTCTCACTCTGTCACTCAGGCTGGAGTATAGTGGC;GCCGGGCAACGCGCTGTCCATGTCGCGGGCCTCGCTGGG…
9815	GIT2	632	100.088607594937	96	NM_014776	GCCGCAGCTGGGACCCGTTAGAGCGGAAGCGCCGCCGCCACCGCCGCCTTTGCTGTCCCCCGGCCTCTAGTTCCCCGCAGGTGGGAGGTGGGAGCC
53343	NUDT9	162;162	297.734567901235;297.734567901235	315;315	NM_024047;NM_001248011	GCCATTACGCAGAGAGAAAGTTACGAGGTTCGTGGCCGCGGTTTCCCCAGGCAGCTGGCGCTGGAGGCTTCGGCGTCACGTGCTGGTCTGGATTTTTCTCGATGCACTGGGGAAAGCGGTGGACTCTTATCGTGGGAGGGCTCTTGATCTGTGATTTATAGATAGGCACAGCTACTCCCGTTCGGGAACCCAACGGCAGACAGGTCCTAGTGCCCATCAGATACCCGCGGCCGGGACTCGGAGCTGTGGGGTGTGGGGAGGCGGAGGCACCAACTAAGAGCGACCTAGCATCGCAAAGCCGCCCTCGGGGCGCTC;GCCATTACGCAGAGAGAAAGTTACGAGGTTCGTGGCCGCGGTTTCCCCAGGCAGCTGGCGCTGGAGGCTTCGGCGTCACGTGC…
9319	TRIP13	103	31.912621359223	19	NM_004237	CACTGCTCTCGGGGGCGCC
7374	UNG	516	141.781007751938	135	NM_003362	GCGACGCTCCTCGGGAAGCCATAGGGCGCCTCCCAGCCCGTCTCCCCGCTCCAGTTTAGAACCTAATTCCCAATTCCCGGACCGGGCCCAGCCCTGGGCTCTTACTGTCCGCTTTTGCTGGGACCTGTTCCACAA
23395	LARS2	100	205.23	204	NM_015340	ATCGATAAAGTTGCTGTTTTGACAACATGGCGGCGCCCATGGTCCGTGGCCCGGCAGTGCTCGCCTAAAGGTGGAGAACGAGGAGTAGAGGAGCCGCAGGCCAGAGCCTGTGAGCAGATCCAGACCTACAGATAAAAAACATTATTTAATCTATCTGGGATTTACTCCGGCTTATGATTTGAGGGCCTTCTCACCTTCTGAAGA
57820	CCNB1IP1	57;64	28;88.734375	28;28	NM_182849;NM_182852	CAGCTTCTGGAGACCTCACTATCCTATT;CAGCTTCTGGAGACCTCACTATCCTATT
6432	SRSF7	1107	106.229448961156	103	NM_001031684	AGTGCCGCCGGGACTCTTGGCGGGTGAAGGTGTGTGTCAGCTTTTGCGTCACTCGAGCCCTGGGCGCTGCTTGCTAAAGAGCCGAGCACGCGGGTCTGTCATC
30000	TNPO2	1122	261.117647058824	257	NM_001136195	TCCTTTAGGGTGTCTTCCGCGATTCTCCGAGTGGAGTTAGGCGCCTGCCGACACTTCCCTAACCTTGGAGGCCCGGGACTTGATTTTCATGAATGAACGGAGCCGGGACTGACTTTGCCTACGGCAAAGAAGGAAAAACGGTGCCCTACTGTCTTCAGACGTCGCAAGGATCAAGAAGATTTCTTTCTTCATGACCCTGCCCTTGCCAGAATTTCCTGCGCTGTTCCACCTCATTCAACTTCAGCTTGCCTTGCGCC
2052	EPHX1	452	481.953539823009	544	NM_001291163	GACTGCGCCGGGGCTGCTGAAAACTAGCCGAGGAGAGCCAGGGAGCCGGAGAGATCGCGCGCCTGCCGCCGCCGGAGCCTGCGAGCCGAGACCGTAAGCGCCCGGGGCCGGCCGGGCCCGCACTCCCCGGACGCAGACGCGGTTCGGGCTCCGCGCGGGCTCGGCCGCCGGGGTGGGCGGCGGGCCGGGGCGCCGAGGGGTCGGGGCTGCGGTCGGCCCGCAGGGGTGCAGAGGGACTTGTAGTTGGTCCGCCCCCAGCTCCTGCCCCGGCCAGGAGACTGCGCGTGCCGCCTACTGGGGGAAGGAGCCTGCAGGCGACCGCGGACTTCTCGCAGGGAATTCCGCGTCCCAGACTGTGGGCGGACGCCGCAGGGAGGGAGGCTCGCGACCCCGAGAGCG…
57211	ADGRG6	488	314.303278688525	336	NM_001032394	ACCCCTGCCTGGCCCGGTCTCCTCAGCACCAGCCCCACGCACACCCTACTTCCTCAGCTTCTCGCCCTCACCCTGCCAACTTCCCTGCGAGGAGGGACCTGCCGCCAGCCTGCTTCCTCGTCCGCAGGCCCTGCGCTGAACGCTGCCGCGCCCAGGGTTCACCTTGCGCCGTCGGGAAAGCCCATGAACTCTCCAGAAACGGCGTAAAGGAGGGTCCCGCCGCGGCGCAGGGCTGGGGCGCCTGGGTTCCCCCTGGGTGGAGCAGCGGCAGCAGAGCGGGAAAGTGGTGGAGGATGATCTTGCGGCCAAAGGGGACCTCGGCGCAGTAATGTCAAC
84733	CBX2	606	40.2359735973597	42	NM_005189	GACTGGCGGCGGGCGCCGCGGTCGGGCTGGCTGCCGGGCAGC
10084	PQBP1	1954;1954;1954	171.203172978506;171.203172978506;182.203172978506	171;171;182	NM_001032382;NM_144495;NM_001032383	CAGTTACTTTCAGGCTCGGGGAGTGAAGGCCTCGTTGAGAGAAGGTCTCATTCGGTGTTTTGGGAAGAGAGTCGTGTGGGCCCAGGTATCGTAGCGGCGACACGAGAGAGACGGGCGGTGTGACAGCCTTCCACTACCTGCACGAGTGTATTGGTCTGTCTGCTATCAGCT;CAGTTACTTTCAGGCTCGGGGAGTGAAGGCCTCGTTGAGAGAAGGTCTCATTCGGTGTTTTGGGAAGAGAGTCGTGTGGGCCCAGGTATCGTAGCGGCGACACGAGAGAGACGGGCGGTGTGACAGCCTTCCACTACCTGCACGAGTGTATTGGTCTGTCTGCTATCAGCT;CAGTTACTTTCAGGCTCGGGGAGTGAAGGCCTCGTTGAGAGAAGGTCTCATTCGG…
64397	ZNF106	406	137.948275862069	135	NM_001284307	GCAGGCTCCCGGACCCAAAACTGAAGGGGGCGTCTGAGGCGTCAGGGAGCTCCCTCGCCTGGCTCTCGGCGGCCTGATGGAGTAAGAGGGGTTGGCTGTGAATGTGTGACGTTGAGTGCTTCAGATCTGGTCACT
55120	FANCL	327	42.37003058104	53	NM_018062	GTGCAGGACCCAGCAGGTCTAGAGCTTTTCTGTGTTTCTCCGGACTTCGAGCC
4735	2015-09-02	1047;983	141.067812798472;83.496439471007	139;83	NM_001008492;NM_001282972	GCGGTCGGTCGGCGCCTGTTCTCGGGCTGTTTGGCGGAGGCTTGGAATAGTTAAATGACTTTGGTCTTGTCCAAGGTTAGATGGAGTTCAACTCTAACGTCAAGTCTTGGTCCTTTTCATTGACGAAGCTTCACAAAAG;GCGGTCGGTCGGCGCCTGTTCTCGGGCTGTTTGGCGGGCGTGGAGGACTGGCCAGCCCCCAAACCTCCAAGCCCATCGGCTGG
6856	SYPL1	5685	79.570448548813	79	NM_182715	GCCACCGGGCTGCTCTGGTCTCGTCGGTCCCCTCCTCCGCCCCGTCGTCCTGACTCTCTCTCCCTCCTTTCCTCAGAGG
5094	PCBP2	665	83.861654135338	108	NM_001128913	CCCCTTTTCCCCTCAGTCGCCTCGCGCCTGCAGTTTTTGGCTTTCACCCCCAACCAGTGACCAAAGACTTGACCACTCAAAGTCCAGCTCCCCAGAACACTGCTCGAC
51203	NUSAP1	7703	76.019472932624	75	NM_001243142	GGCGCCAGGGATTTGAACCGCGCTGACGAAGTTTGGTGATCCATCTTCCGAGTATCGCCGGGATTTCGAATCGCG
57231	SNX14	398	138.251256281407	127	NM_153816	GGCTAACTGCCGGTAGGCGTCTGTGTGCGCCGCCAAGTCGGTGGGGCGGGGACGCGAGGTGTGGATGGGGGGTCGCCTTGACCTCTGCCTCAGCCAGTAGCGCAGTCTCGGCCTCGCCGTTACGGAG
4595	MUTYH	124;163;124	267;284.460122699387;117	267;252;117	NM_001293195;NM_001293196;NM_001048174	GCCGGAAAGCCGGGCGCGCTAGAGCTCGCGGGAGGTAATCTTTCTCTCCTGCTCTCGCGGCGGGAACGCGGGGCCTCCGTGTTCTGCTGTCTTCATCAGCGTGGGCCGCGGGTATCTATTGTGTACAGTTTACCTGGCACTGACTTTGGACACACACCAATCAACAAGAGAATCAGTCCTTGCACTCAAGTCGTTTTTTACAGTCAAATTCAGGAAGTACACACTGATGGAAAGAATCAAAGTAATGTAAAATTACATTAGGCCATC;GCCGGAAAGCCGGGCGCGCTAGAGCTCGCGGGAGGCCATCATGAGGAAGCCACGAGCAGCCGTGGGAAGTGGTCACAGGAAGCAGGCAGCCAGCCAGGAAGGGAGGCAGAAGCATGCTAAGAACAACAGTC…
2555	GABRA2	490	405	405	NM_001286827	TCCCCCTCCTCCTCTTCCTCCTCCTCCTCTTCCTCCTCCTCCGCCCATCACCGCCACTACGAACGCCTTCGCCTCCTTCTACACCTCGCGCCGCCGCCGCGGCTCCTAGCGCTCCTCTCCGGCTTCCACCAGCCCATCGCTCCACGCTCTCTTGGCTGCTGCAGTCTCGGTCTCTCTCTCTCTCTCTCTCTCTCTCTCTCTCTCTCTCTCTCTCTCTCTCTCTCTCTCTCCCAAGTTTCCTATCTCGTCAAGATCAGGGCAAAAGGAAGAAAACACCGAATTCTGCTTGCCGTTTCAGAGCGGCGGTGATGAAGACAAAATTGAACATCTACAACATGCAGTTCCTGCTTTTTGTTTTCTTGGTGTGGGACCCTGCCAGGTTGGTGCTGGCTAACATCC…
10102	TSFM	1251	28.587529976019	29	NM_001172697	GCCGGAGGGTGTTTATCGCGGCTAGAGAG
5510	PPP1R7	450;768	113.357777777778;532.971354166667	120;911	NM_001282412;NM_002712	GCTAAGGGTTGCTAGGGACGCACCAAACACCCCTACGGCGCTTCGGAGGAGCCAAAGGAATAATGGGCGCCTCCGCCCCCGGGCCGGGCAGATGCGGTTTCCTCCCGACTCGCGATCAAA;GCTAAGGGTTGCTAGGGACGCACCAAACACCCCTACGGCGCTTCGGAGGAGCCAAAGGAATAATGGGCGCCTCCGCCCCCGGGCCGGGCAGATGCGGTTTCCTCCCGACTCGCGATCAAAATGGGTGAGTAGCGCAGAGCTCGCCTCTTGGAGGCCTCTTTCTGAAGGCGGAGGACGCGGGGCGGCTCGTTCATGGGCCGGGTGGCTCCGCAGGGTAGACGAAGGCTGCAGCGTCCGCACTGGGCTGGGAACGACTTGCAAGGGGAGCCCAGCTGGCG…
9191	DEDD	58	189.568965517241	194	NM_032998	GGCGGCGGCTGCTGGAGCCCGGATGCGGCGCCGTGAGGCAGGCCCGGGAGAGCGGCGCGGATGGATCCAACATGGCGGCGCCGAGCCTGAGCCGAGAGAAGAGACCTGGGAAATTAAGTTTCTTGCGGAGTACGGTGGGGATTGCAGCTGCTGAGCAGGGATTCTGGAAAGCATTGCGTACCTGAGCCCCCAGC
91966	CXorf40A	1310	553.674809160305	571	NM_001171907	GTATGAAAGCGGAAGAGTTATAGACCGCTAACACCTGTCACTGGCCACTGGTTTCCCGGAGTTAGCGGCAACGACCTTGCAGCCTGGACACTAGCCAGGCGCTCCCTCTTCTCACAGCGGCCCACGTCTCCTTGCTTGGGAGCCCATCGTCCTGGCTCCGGTGGCCTCGCTGGGTCTCGGGGAAGCAGAGGACTGTTCATTCCTGTGGCGAAAAGCCGGAGTCGGCCCTAGACACCCACGACTCGCAGGGTCCATGGTTCCGGAGGCCGTGAGACCTGCCGGGGCTGACAGGTGCCAGGGCCCATGCTGCGGGAGCCTGTGTGCTCAGCCTTCTTGCGGACGGTAAAGAAGCTAAGTGGAAGAGTGTTTCCTCCTCTGGCCGTAAAGCAGGTACTCTCT…
54883	CWC25	157	131.866242038217	130	NM_017748	GGTGAAACTGGCAGTTGACGGCTCCTGGGACTAGATCCCGCGAGGTAGCCCCCGAACTATTTCTCTACGTTTTCTCTTGATCCTCCCGAAATCTTCCAGATCCGCGTAGTGAGGAATCGTCTCCACCGTC
9179	AP4M1	86	75.348837209302	111	NM_004722	GGAGGAGAATCGCTCTTAAAGGGCCAGCGCACACGCGTTCTTTTGTTCCGGGGCCGCAGGGCGGGGCAGGCCCGACTTTCGCCGTCTTCTTGTCTACTCTCCAGAACGGCC
2355	FOSL2	71	865.577464788732	863	NM_005253	GTAGTGACTCATCTCGGGCAGAGCGCTAGGGCTCCGAGCGAACCAGCGAGCGAGCGAACGAGCGGCGCTCGGCGGGGACAGAAAGAGGGAGAGAGAGAGAGAGAGAGAGGGAGAGGCGCGGCCGGGCGAGGCGGGCCCGTCCGGGAGCGGGCTCCGGGGAAGGGGTGCGGGTCTGGGCGCCGGAGCGGGGAGCGGGGCCGCGTCCCTCTCAGCGCCAGCTCTACTTGAGCCCCACGAGCCGCTGTCCCCCTGGCGCGCTCGGGGCCGCGGGACGGGCGCACGCCGCCTTCTCCTAGTCAAGTATCCGAGCCGCCCCGAAACTCGGGCGGCGAGTCGGCCACGGGAAGTTTATTCTCCGGCTCCTTTTCTAAAAGGAAGAAACAGAAGTTTCTCCCAGCG…
338699	ANKRD42	1593	923.69805398619	935	NM_001300973	GCTGCCTCTCCAGCCAAGTGGCTGGAGTCGGGAGGCTGGAAAGAGACTCCGAGAAAGTACCAGCGGAAGGCGGCCGCCGCTACGGCGATTCGCAGGGAGTAGCAGACGAAGACGGTGGCCGCCGCACTAGCCACCACGTGTGGAGGATAAACGGTCTACACGGCCATTCCGGCGCCGAGTCTAGGGAAAGAGTTAGCGACGACGGGGAAAGAAAATGTGAAGAGAGCGACCGCCGCTCCAGGGTCGCTGCAGGAAGCCTAAGTGCAGACGCCGGCTTCTCCCGCAGTGACTTGAGAAGGGTCAGTGAAAACCTCGGCCACTGCCGCAGCGTCTCTAGGGAGAGAGTTAGGGGAGATAGTGGCCACAGTCACAGCTGCTCTTGGGAGAGAGTTAGGGGAG…
7163	TPD52	1030;186;1030	66.374757281553;233.629032258065;66.374757281553	65;341;65	NM_001025253;NM_001287140;NM_001287144	GATCCGAGCCGGGACGGGCTGCAGGCGGGGGTGCTGCAGAGGACACGAGGCGGCGGGCTGGAGAC;GGCCATATTGCAGAACCCTGCCCTTCTTTGTTGACTGAGGAAAGCTCGCTCCCTGCCCAGGTTTTTCATTGTTGATCGAAATTAACACCAGGTGGTGAATAGAGCCCCTCCTAAGGTTGCTCAGGATAAATCATTTATTAAATAGGTCTGCTTATCAGGAGGGGCGTGAAGGCTCCCAAAAGGAAATGCTGGCACCTGGGCCCAGAAGCCAGGGCCTCTAACTCCTGGGGTTGATTTCTTCAGTGAAGTTGCACCCTACAAAGGGAATATGGCCAAAGCGGCACTCAACTGAAGGCTGATATCAGGCGATTAGACAGCCATGCATTCTGCGTT…
1962	EHHADH	752	34.553191489362	15	NM_001966	GGTGATAGAGGAAAC
51693	TRAPPC2L	755	37.6569536423841	18	NM_016209	GGCGCCGAGCCTCCCAAG
79973	ZNF442	87	593	593	NM_030824	GTAGCTGAGAGAAGCCCTGGCAGGTCAGTGGCAGGCACTGTCACGCTGAGTCCTATGCTGGCAGCGGGGAACCTTGGGGAGAACACGGGACACCGCGGAAGCCGGGAAATGATTGTGCGGCTGTAACCGGCACAGGTTCGCGGTCCGAGTCACTGCACCGAGACTCCAAGGCCTGCAGCAGAAACAGTTTAATAGGGGGAGAGGAGAGAAGACCCCAGTTCCGCCTCCATGAGAGGTTTGGGGATGGGGGTGTTTAGGGGTCTGGACAGGGGCGGCTGAAGTGTGGGGTCGCTGGTTGGTGGGGAAGTGACAGGCGAATCCTGGGACGGGAGGTGAAGAAACCGCATTCTCCTGCTGAGTGGGTTCCCTCGTGGGGTTTTCACCCTGCTTGGCGCCAGC…
65999	LRRC61	864	377.064814814815	364	NM_001142928	ACTTCCCAGCTTGGCCAGTGGCTCCGCAGGCTGCCGGCTCCACCCCTCAGATTCATTTGGATTCAAGGTTGGCTCTCAACAGTGCCAGCTGCACTGTCATCCTAAAGTACTTCTGTGGAAGAGAACATGGTGGTGTCACTGTTGTACCAGTGATGACACAAAATCCCAGATCTACCTGACGGGCCTGCGAGGGTTGAAGATTGTGAAGCAATAGCCTAAGGGACTGGCTGGCTTCGAGCAGGGCATCGGAACCAGGCCTCCTGGCACTGGCCTGGGTAGAGCCAGGGCGAGCACCAGCTGACCCCCAGTGGAACCCTGTGACAGTCCTGCCAGGGCCCAGGCCATCCCAACCGACTTCCATCTC
5245	PHB	1838;10555	163.678998911861;60.921648507816	167;60	NM_001281715;NM_001281497	GCAGTATGTGTGGTTGGGGAATTCATGTGGAGGTCAGAGTGGAAGCAGTTATCTTGGCCCCAGGATGTCATCCAGCTCCTGCTTCCATAAGAAGCATGTCGTTCTTAATACACGATGTTGACAAGCAGTATGGTGAGGAGGTGTGAGAGGGTCCAGCAGAAGGAAAC;GGGGAATTCATGTGGAGGTCAGAGTGGAAGCAGGTGTGAGAGGGTCCAGCAGAAGGAAAC
4134	MAP4	1873	87.5360384410041	54	NM_002375	TCCCTTCTGCCCCAGCTCCGTCTCGGCGGCGGCGGGCAGTTGCAGTGGTGCAGA
7090	TLE3	113	1054.28318584071	1096	NM_001282979	GCGGCAGTTCAGACCTCGTGCTCGTCCCCTTCGCCTGTCTGTGTGTGGTATCCGTAGGTCCGGGGCACTTTTTTTTTTGGTGTGTGTGTGTGTGCGTGCGCGCGTGTGTGTGTGTTGGGTGTGTGTGTTTTGGGGGTTTGCCGGGGCGCGGAGAGGAGAGCCGGGCCGAGGGGAAGGAAGGAAGCCGTAGAGCTCCCCGGTCTCGGGCTGCGTCTCCCCTCCAGCGCTCTCCTGCCTGTGCGCTCCGACGCGGCAGCGGCGGTGGCGCTGAGCGCTCCTCGGTGGGGACGCGGTGCTCAAGCTGGGAGCAGCGAGAACCCTTTGCGGAGGCTTCCCGTGCCCGCTGGACTTAGGATGCCAGGGCGTTTGATTTGCACCTACTGAGCCCGGAGTTCCTCC…
7581	ZNF33A	95	126.715789473684	111	NM_006974	GGCGGTCCCGGGATTTCAAGGGTCTACGCGCTTTTCTATGGCGAATGCAACCCGACGAGGGAGTGGGCTGTATCTTCAGAGTTGTCTCCGTCTTTCCAAGAACAGAACAAA
1639	DCTN1	210	84.552380952381	72	NM_001190836	GGGCGTCGGTCGTCGGTGGGGTCGGAGCTGGGCGCGGAGCCCCTCACAGTGCAGACGCCCAGCGGCAGCAGG
63932	CXorf56	866	282.497690531178	286	NM_001170569	GGCGTAGAGTTTTCAGATTGCTCTTGGGAATCATGCCGAAAGTAGTGTCTCGGTCAGTAGTCTGCTCTGACACTCGGGACCGGGAGGAATATGACGACGGCGAGAAGCCCCTCCATGTTTACTACTGTTTGTGCGGCCAGATGGTCCTAGTGCTGGGTGAGTAGCCGGGAACTGCGGGGGCGTCTGCAAGGAGCCAGACTTCGGGTTCTTGAAGGCGAATTTCCTCTGGCTGTGATCTGGGAGCCACTTCTCAACGAAGATTGACTGCCAGTTAGAGAAATTGCCC
84936	ZFYVE19	1034;1034;212	255.906189555126;583.906189555126;196.834905660377	192;520;171	NM_001077268;NM_001258421;NM_032850	CTAGCAGCGCGTACAGGTCCATCTGTAAGAGCTCCTTGGTCACTGCCATGGTTCCGGCCTGACGGATTCGTACTACAACTCCCAAGAGTCTAAGCGCGCGTGAGGACTGCAGGCTCCGAGCGGCGCCTAGCCCTCTGGGAATTGTGTTCTGGGTCAGGCTTGACTGACTCTGAGGGAGGCCGGCAGTCGTGA;CTAGCAGCGCGTACAGGTCCATCTGTAAGAGCTCCTTGGTCACTGCCATGGTTCCGGCCTGACGGATTCGTACTACAACTCCCAAGAGTCTAAGCGCGCGTGAGGACTGCAGGCTCCGAGCGGCGCCTAGCCCTCTGGGAATTGTGTTCTGGGTCAGGCTTGACTGACTCTGAGGGAGGCCGGCAGTCGTGAATGAACTACGACTC…
84766	CRACR2A	184	488.842391304348	481	NM_001144958	GGAGCGGAAAGAGTCGGGCGGAGCAGGCGGCTGCTTGACAGCTGAGAGCCGAGCGGGCGGCGCGGGCAGGTCCACGGGAAGCCTACACGCCCAAGGTCATGCCCTGACCACAGCTGCCCTTCAGGAGGCTGGCACGGAGCCACCTGGGGCCATTGGGCTGTTTGTCAAGGGTGGGGCAGCAGCAACTTGCCACTCTTCCTCCATGAGCCCAGCCAGAGCCTCCACTGGGCACTTAGCACAAGAAAAACCCTGCAGGAGCCGGATCCAGAGCGCTGGGATTCAGCAGGAGTGCCAGGAGAATTCAACACAGGTGTGCTGCCTCCTCTCCTGCCAGGTGTGTGGCTGCACAGGAGTCTTGCTGATGGTGGAATTCAAGTCACCAGTGGCCAAAGTACCCTC…
64834	ELOVL1	2840;2840;250	110.107394366197;162.107394366197;134.712	111;163;131	NM_022821;NM_001256402;NM_001256399	AGATGAGGAAGTGGCAGGCAGGCAGGCTGGCCCCGGGGACTTCTCTCTGGCCCTGCTCCCTCCGAGCGCTCCGCCGTTGCCCGCCTGGCCCCTACGGAGTCCTTAGCCAGG;AGATGAGGAAGTGGCAGGCAGGCAGGCTGGCCCCGGGGACTTCTCTCTGGCCCTGCTCCCTCCGAGCGCTCCGCCGTTGCCCGCCTGGCCCCTACGGAGTCCTTAGCCAGGATGGAGGCTGTTGTGAACTTGTACCAAGAGGTGATGAAGCACGCAGTTCCTG;ATCCATCTTAAAGGAAGGAAGGGACGGGCTGAGTTCCCCGACGAGAGACACACCCAGATTTTCCTGCAGCTTGGGGAGAGGTCCTCCCAGGAGCCTTGGTCCCTCCTGGCCTGCCGGAGTCCT…
9868	TOMM70A	107	451.934579439252	490	NM_014820	ATTCCAGTGCTGTGCCGCTGCTTTTTCTTCCACTCGGATCTCTTGAGCGCCCTTAGCCCGCTGTATACGCGCCCCTCCTCGGCTTCAGTAGGCAAGAGGGCCATCTGCCCTTCTTTCCTGAAGGTAGAGGGGACAACACCAGCTACGACGGGGACTCCAGAAGTCCATCTCCCGAACAGCAGCGGGGCGAAAAGAAAGAAAAAGGGTTTCCGAAGACTCCTACTCACACCCACGCTTTCCCTTAACCCGGAAGTGATTTCCGCCCCTCCTCTCCCTCTTCGGTTGATACTGGAGGAGAAGGACGGCCAGGTCTGGCCCGGCATGCCCTGGGCTTCCGGTGACCTCTGGCCCTTTTCTGTCGTCCGCTCTCTCTGCCTAGCGTGCTCGCTCGCTCATTGC…
9260	PDLIM7	64	89.84375	89	NM_203352	GGTCAGAACACTGGCGGCCGATCCCAACGAGGCTCCCTGGAGCCCGACGCAGAGCAGCGCCCTGGCCGGGCCAAGCAGGAGCCGGCATC
158055	C9orf163	210	751.580952380952	729	NM_152571	GCTGAGAAGCGCGGGGCCCTGACGCGGGCGCGCTCCTCGCATTCTTCCGTTGGGCTGGGAGGCTGGAGGGCAGGCGGCGGCGGCCGCGCATGCGCCGGGAGCGGCCGGAGCTGCGGGACGCGGAGGGCCGACTGCGCCTGCGCGCTGGTTGCCTGGTTACGGCGTGGCCGCGGGCACCGAGCGGCGCCGGAAGTTGGTCGATGGCTGCCGCCAGTCCCTGGCCAGCGTCCTGGGGTTTCCCCGACGCATCCTCTACTGTCCCTTCGCTCTGCACAGAGGCCCGGGCAGGGAGGGGCGGCCCGGCCACCGCGCGGAGCCGGGTGTCCGCCGACTCGCAAGGGGGACGCGCGGGCTCCTCGTCCCCAAGCTCCGCCCTGCGCCTTTGCTGCGCCGGGCCCT…
3661	IRF3	654;665;665	284.915902140673;188.906766917293;188.906766917293	296;203;203	NM_001197128;NM_001197124;NM_001197122	ATCGGCTTTTGGGTCTGTTACCCAAAGAATGATAAAGTTGGTTTTATTTCAAGAAGTCGATCAAAAAGAAAGCCCCAGCGCTCTAGAGCTCAGCTGACGGGAAAGGGGGTGCGCAGCCTCGAGTTTGAGAGCTACCCGGAGCTCCAAGACAGGGGTGGGTTCCAGCTGCCCGCACGCCCCGACCTTCCATCGTAGGAGTTGGGGACTTTTCCCAGCCAGACACCTCTCCGGACACCAATGGTGGAGGCAGTACTTCTGATACCCAGGAAGACATTCTGGATGAGTTACTGGGTAAC;ATCGGCTTTTGGGTCTGTTACCCAAAGAATGATAAAGTTGGTTTTATTTCAAGAAGTCGATCAAAAAGAAAGCCCCAGCGCTCTAGAGCTCAGCTGACGGGA…
686	BTD	442	258.140271493213	265	NM_001281723	TCCGGCATCTTCCACCGAAAAGCTCTAAGCACTCACGCAGCCGGCAAACAAGCGGAATCATCCAGCAAGGCAAACGCGAAATCGGCAGCACGCCACCTCTGGTACTGCACCTCTGACGGACAGGAGGGCAACCAACTGCCTTAAACAACGGGAAGGAAGAGGCGGTCTAAATTCGTCCACTTCCCGGGAGAGGTGAGAATGTAAACACGCGCGTTCTCCAATCAGAACTGCGCTCTCTTCTCGGCTCCTCCATTCGCGCGCCAGA
23471	TRAM1	1181	93.32684165961	104	NM_014294	GGGGCCGTGAGGAGCAGCCAGCGGGAGGCGGCGGCGAGTCGGTGAGCAGCTGGGAAGAGCAGAACCGGGGCGGAGCACCTGCAGGCGCGGGCGGCGGCCCCACC
9328	GTF3C5	4320	171.584953703704	118	NM_001286709	GCCAGACGCACAGGGATGGCGGCGGAGGCGGCCGATTTGGGGCTGGGGGCCGCCGTCCCCGTGGAGCTGAGGCGGGAGCGACGCATGGTGTGCGTGGAGTACCCGGGAGTGGTGCGTG
10500	SEMA6C	82	294	294	NM_030913	CTCCGCGGATCCGCGGCTGGACTTGGACCCAGGGCTCTCCCGACAGCGCCCTGGAACCCAAATTCAAGCACCATCCAATTCGGACGCTCATCGCATCTCGCCTGAGCACAACCACGGATTGCGAACTCAGCGCAGCGCGTGGCCGCTGGCCGCCCGCGGCGATCTCGATCCCGCTGACCCGAATCCTGGAGTCAGAGGTTTCCTATCCCCCTCAAGCCCCCACAGGAGTCACCAACCCAGGGCCGGCTTATGGGTGAGGGGGCACCCCCTGGGGCCTGAGCTGCCCCGCACAGG
2045	EPHA7	314	202.980891719745	218	NM_001288630	GGTCTGCAGTCGGAGACTTGCAGGCAGCAAACACGGTGCGAGCGAACAGGAGTGGGGGGGAAATTAAAAAAAGCTAAACGTGGAGCAGCCGATCGGGGACCGAGAAGGGGAATCGATGCAAGGAGCACAATAAAACAAAAGCTACTTCGGAACAAACAGCATTTAAAAATCCACGACTCAAGATAACTGAAACCTAAAATAAAACCTGCTCATGCACC
220869	CBWD5	10408	1825.31898539585	1824	NM_001286835	GCGGTACGGCGTGTTGGTCCCAGCGGTTCAGCTGAGGTAGGGACGTGCCGTAGGCCGGAATGTTACCGGCTGTTGGATCTGTGGATGAGGAAGAGGATCCTGCGGAGGAGGATTGTCCTGAATTGGTTCCCATTGAGACGACGCAAAGCGAGGAGGAGGAAAAGTCTGGCCTCGGCGCCAAGATCCCAGTCACAATTATCACCGGGTATTTAGGTGCTGGGAAGACAACACTTCTGAACTATATTTTGACAGAGCAACATAGTAAAAGAGTAGCGGTCATTTTAAATGAATCTGGGGAAGGAAGTGCGCTGGAGAAATCCTTAGCTGTCAGCCAAGGTGGAGAGCTCTATGAAGAGTGGCTGGAACTTAGAAACGGTTGCCTCTGCTGTTCAGTGAAGG…
396	ARHGDIA	1985;1985;1985;221;221	91.934508816121;91.934508816121;91.934508816121;84.683257918552;84.683257918552	67;67;67;106;106	NM_001185078;NM_001301242;NM_001301243;NM_001185077;NM_001301241	AGTGCGGGAGGGATCCTGAACCGCGCGGCCGAACCCTCCGGTGTCCCGACCCAGGCTAAGCTTGAGC;AGTGCGGGAGGGATCCTGAACCGCGCGGCCGAACCCTCCGGTGTCCCGACCCAGGCTAAGCTTGAGC;AGTGCGGGAGGGATCCTGAACCGCGCGGCCGAACCCTCCGGTGTCCCGACCCAGGCTAAGCTTGAGC;GGGTGTCCCGGGTGTGCTGCTCCCTGACCCACCTCCCACGCTGCCGGGAAGGATCTGAGCCTGACAGATCCCCTGCCGGGTGTCCCGACCCAGGCTAAGCTTGAGC;GGGTGTCCCGGGTGTGCTGCTCCCTGACCCACCTCCCACGCTGCCGGGAAGGATCTGAGCCTGACAGATCCCCTGCCGGGTGTCCCGA…
90196	SYS1	1816;342	165.223568281938;133.663742690058	160;139	NM_033542;NM_001197129	TCCTACGCAGCCGCTCCTGCCGCCGTGGTCGCTGGAGCTTTGCCTCTCTAGGCCGGCAGCGCCTCTCCTCCATGGTCCTGTCTGTCAGCGCTGTTTTGGGAGCCCGCCGGTGAGGCCGGGCCACGCTCAGACACTTCGATCGTCGAGTCTGTCACTGGGC;GCCGTGGTCGCTGGAGCTTTGCCTCTCTAGGCCGGCAGCGCCTCTCCTCCATGGTCCTGTCTGTCAGCGCTGTTTTGGGAGCCCGCCGGTGAGGCCGGGCCACGCTCAGACACTTCGATCGTCGAGTCTGTCACTGGGC
64116	SLC39A8	4702	391.35835814547	392	NM_001135146	GGAGTTTCACCGCGGACCTGTCAGAGATACAGAGGTTGTGGGGGCGGGAGACAGAAAGAGAGAGAGATCCAGAGACCGAGTCTTACGTTGACACGCAGAGAGAAAGACGCAGAGACAGACAAACAAACAGATAGGAGAGGCTCTCCAGGAGGCCGGGGGGCCCACTCCGCCTATCGCTCCCCTCGGCTACGCTGCCACTTCAATGCCCCGCAGGTCGCGAGCTGCTGTTCTTTCGAAGGCGTCGGAGAACCAGGGGCGTCCCGCGCCACCTCTGACTCGGAGCAGCGCCGAGCACTGACGCTCCCGCCCTTGGGCAAGGACGCCAGTGCGCCCGCGCGCGTCCCTCTGCGCGGCAGCCCGTCGCGGGCCCTCAAGGGGAAGCCCAGGCCAGG
26263	FBXO22	2068	22.958413926499	13	NM_147188	GGGCTGGTGAGGA
6122	RPL3	5600	25.343392857143	26	NM_000967	CTCTACCGGCGGGATTTGATGGCGTG
55039	TRMT12	1833	89.594653573377	111	NM_017956	GTCATTTCCGGCACCGGCATGGCCGGGTGAGCTGCAGGCTACCTTATTTAAGACCGGGAATTTAGTCAGCCTGGTGAGCCGACTCTGAGGAGATGGAGTATCGCTGAGGTG
51303	FKBP11	295	81.271186440678	93	NM_001143782	CAGTCTGGCCTGGGCGCCGCGGGAACGCTGTCCTGGCTGCCGCCACCCGAACAGCCTGTCCTGGTGCCCCGGCTCCCTGCCCCGCGCCCAGTC
122704	MRPL52	756;238	304.925925925926;28.8529411764706	315;29	NM_181305;NM_178336	TCCGGCTACCCCGGCTACTCCTGCTCAGCATGGCTGCTTTAGGGACTGTTCTCTTCAGTGAGTGGGTATAGATAGGGACCGTGGACTCGGGGGCCCTTTGGGGACGGGCACAGGACCCCTGATCCGGCTGCGCGGCCTCTCCCCCAACTCTGCTCTGTTCTCCCAGCAGGTGTCCGGAGGCTGCACTGCAGCGTAGCCGCTTGGGCGGGCGGCCAGTGGCGACTACAGCAGGGACTGGCTGCCAACCCCTCCGGCTACGGGCCCCTTACCGAGCTCCCAGACTGGTCATATGCGGATGGCCGCCCTGCTCCCCCA;TCCGGCTACCCCGGCTACTCCTGCTCAGC
9203	ZMYM3	1290	134.790697674419	170	NM_201599	GGTGCAGAGCGCTGGGCGCTGCGAGCGGCGCTGCCATTTAAAGGGGCCGCGACCCCTGTCCCGGCTGCTAGGGAGGGAGGTAGAGAAGGAGCGCGGGGCCGTCGCTGTCTGCAGTTCTAGGCTTGTAGCCTTTGCACTAACCCTGCCGCAGTACATATCCAGCCATACTC
5000	ORC4	2291	113.509821038848	96	NM_181741	AGGTGAAGTCTAGCAGAGGACGCGGCCAGGCGATTCGGTGAAGCGATTCCTGCAGGCGTTGGTTCCCCTCTTTGACCTGGATTTGAATTTGTTGAA
51070	NOSIP	53	45.188679245283	43	NM_001270960	ACAGTTGAAGAAGCGACCGAGGGACTGGGAGTCGTTAGTGAGG
10768	AHCYL1	134	317.708955223881	4	NM_001242673	TGAC
10558	SPTLC1	5035	21.85084409136	25	NM_006415	GCCTTCCGGAAGGAAGCGGCTAACT
6482	ST3GAL1	1295	1015.82625482625	1007	NM_003033	AGCCTCCGCCGGCGGAGCCCACTATGCCAGACAGTTTCGACACTTTGCAAAGACAAAGAGCCCTAGACCGGAGGGAGGAGGAGGAGGAAGAAGAGCGGAGAGAGAAGGAAGAGGCGATGTGAGCTGGGAAGGGGGCAAGTGTCCGGGACACCCACACCCCTGTATTCTCCTCCGAACCCCTTCATGCCCAAATCCCGGAAACTCCAGCGTGTCTCCAGCCGTGTTGGTACCATTTTCAGATTTCATCTTCCTAAACTGGAAATGTCAATGAGAGGAAATTAACACCCCCAAGAGCTGCAGTGAGCAAATGCATTGAGCTTGGGTCAGGACAATTCCATTTGGGGACCAGAGATGGACGGTCACTCAGCCTATGGAGATGAAGAAACTGAGGTTCAGAGA…
2021	ENDOG	54	197.5	207	NM_004435	GCGCAAAGAAAGGACGCCGGGGACACCCGGTTGGGCTCTGCTGCTCCCTTCTGGGTTCCGAGGCCCAAGCCCTTGGCAGTGTTTGTGAGTGGAAGGGAGGTCACGCTATCGTCCGCGGCCCCAGCAGCCCTGTGCCCTCGTTGGATCCCGCGACGCGGCTCCTTTAAGAGCCTCGCGGGTCGCCCGCCGCTAGGTCGCTCCCCGGCC
729533	FAM72A	65	410.230769230769	377	NM_001123168	GGAGAAGGCTGAGGGAATTGCTATGAAGGGGCGGGAGCTGAAGTGTAGAGGACTCCTTTAGACAGCAGAAAGGGAAAGCCGTTGAGAAGTTCCCTTCAAACTCCACCTGCCTCCTCTCCAATTCAAACTCCACTCCCTTCTCCAAAAGTTAAAAGGAAAGCCAAGTTTGCCACGCTCCCCTGTTCCTACTCAATAAATACTTCTTCTACTCCGCCACCGGGAAAACAGAAAAAAAAACTAATTTCCTTCCCAATATTAGGACTTAGAAAAGCTCTAGGTCCCGCAATTTGAATTTTAGCCTAGGGGAATCAAAATAGTAGGAGCATTACTCTTGTTTCCTTTTTCAAAATCCCACACCTCATCCTTCCTGCGACGCC
55249	YY1AP1	1948;1948	190.563141683778;198.563141683778	185;193	NM_001198900;NM_139119	GAGAAGAGGAGGTGGAGAAGGCTTGGGCTCGCGCCGCTGAAGTCGGCTTACCCGCTGGCCGCCTCCTGACAAGCGGGAGGGATCCGCGGTGGACCCAGGGAAGCGGAGGAGCCTGGCGGCCACCCCCTCTTCCTCACTTCCCTGTACTCTCATCGCTCTCGGCCTCCGACACGTTCCAAGATGAG;GAGAAGAGGAGGTGGAGAAGGCTTGGGCTCGCGCCGCTGAAGTCGGCTTACCCGCTGGCCGCCTCCTGACAAGCGGGAGGGATCCGCGGTGGACCCAGGGAAGCGGAGGAGCCTGGCGGCCACCCCCTCTTCCTCACTTCCCTGTACTCTCATCGCTCTCGGCCTCCGACACGAAAAGGAAGCAAATGAGCTG
114823	LENG8	1151	159.309296264118	166	NM_052925	GTCGAAGCCAAAGAAGACCAGAGCCAGCCGGGTGGCACAGCGGTGTCGTGGCCGTGTTGCTGATCGCCTGGGTGGTTGTTGGCGTGTCCCTGCAGCGAAGGATCCTGGTTGACAGTGAAAAAGCAGTCTGGCTCCCGAGGTCCACCCCTTATACCCCAAGGTCCAG
92255	LMBRD2	401	400.633416458853	389	NM_001007527	GACTGGGAAATGTCAGCCGCTGGACTGTAGACGGATTTTCCTTTCTCGGGAGCCCGCAGGCCTTCTGGTGATCGCCAGCGCTGTCGTCTCTGAGCGTGGATCCCAGAACCTGGACAGCTGTGGCGGCCGCCGTTTCCCGGTCCCGTCCAGACGCTGTCTGGCGAGATCGGACGGTGAGCCTAAGGCGGAACGCGTGAGGCGCTTTTGAGTCTGGGGTCCGGGGCCGAGAGCAGGCGGAAAGAGAGGGGACCCGGCAGACCCCGAGTGGCCGCCGCTGCGGGGCCCAAGTCCTTGGCTGCTGAGTGGTGACAGTAGCCCAGCCCGCCGGCCAGATATGGTCCAGACCTGTACATGAATAACTTTGGTTAGTCAGAGTGAAATATTCAATA
80851	SH3BP5L	116	371.646551724138	484	NM_030645	GGGGGGAGATTGTTTGCAGCATAGAAGCTCCGCGGACGGGAAGGTAAACTGAGCTCCCCAGAGACGCTCATCCTACAGCCTCAGCTCGGGCCCAGCCTTCTCTCTCCAGCTGCCACCACAGCCTGGAGGCGCCTGCCTCCACCCTCCCGAATGGTGCTCCTCCTAGCAGGCCTCGGTCCAGGATCCAAGCCCCCTTTGCCCCCTGCCTTGGAGCTGTTGCTCCGGGTTTGTCACAGTGGACTCCCTGTGGCGGGAAGGGAAGAACTTTTGCACAGACAAGGCTTCAGCTCTAGGAACCCCACTGACAACTTGAATCTCAACCTCTAACCTAGTGTGAGGTTCTTCCTGTGCCCACCTTTTCTGCCTTTTGAGAAGAGAAACTCTTCTCCTGGCCATCTA…
5883	RAD9A	144	63.791666666667	53	NM_004584	GGAGGTCGCGGAGAGCTGGGCAGTGTTGGCCGCTGGCGGAGCGCTGGGGCAGC
80179	MYO19	436	617.770642201835	644	NM_025109	CGTGGGAAGCTGCCGCTTTACCCTCATTTTACCCCAGGGTCGCAAAACATCTCACCGTAGTTGAAGCCAGCAAGCCGGACCAGGCGTCCCGGCCAAGCCACGTGCGCGCCCCGCGCCGCGAGTGCTCGCCCCGCCCCTAGGGAGGAGCCGGCCGACCCCCGGCCACTTAGCAGTGCCGCAGCCGACGGGGTGCGGTTCGGCGCTCCCAGGTTCCTTTCCTCACTGCACGCTCTTGCCCCTCCTCTTTTCTCTCCTGCCCGTGTTCTTCCCGCCGCCTGACCTGGCCCGCCCGCCTTTCCAGTCTGGCCGGGCGGGGGCCTGAAGCACGGCGGCTCGGGCCGTGGGACCGTGTTCACACCCTTTCCAGAAATTCTTGGCTGGTAACCGCGAAACCGACTG…
5864	RAB3A	345	124.457971014493	112	NM_002866	GCTGCTGCCGCCGCCGCCGCGCAGCCCCACATCAACGCACCGGGGTCCTGTCACCGCCACCGCCAAAAAAGTCACCGCCGCTAGGGTCGCCGTTGCATCGGTGCAGGGCAAG
84919	PPP1R15B	1176	343.81887755102	401	NM_032833	GGGCTTCGCTTCCACCGCACCAGCCGGCCTACCCAGTCCTTCCGGTATCGCGTTGCTCAGGGGCTTTTCAACCCTCTGTCAGTCGGAAAACCATCGCCGAGGCCGTGGGGGGACTCCTATCCATGGTGTTGAAGCGTCGAGCCGACTAGGGAACCTCCTTCCCCGCCAGGATGGAAGTCGCATCAGTCGCCGCCTATTGCGCGGGCTGTTCTTCCCTGTGTTCTGCCGCCCGCTGCCGCATTCGCTGCCCTCTGTGGCTTTTCTGCTGGCTCGAAGATCGGCCTGGAGCAGCGACGCCACCGCTGGGCAAGGCCGAGACTCTGTAGGCTTCCTCCGAATCCCGTCGACCTCCAGCCGCTGAGCGCCGCGGCCCTACCTGAGAGACTGTCAAGAAAAAGG…
6311	ATXN2	77	182.142857142857	173	NM_002973	GCCCTCACCCGACCCCCGAGAAAGCAACCCAGCGCGCCGCCCGCTCCTCACGTGTCCCTCCCGGCCCCGGGGCCACCTCACGTTCTGCTTCCGTCTGACCCCTCCGACTTCCGGTAAAGAGTCCCTATCCGCACCTCCGCTCCCACCCGGCGCCTCGGCGCGCCCGCCCTCCG
1837	DTNA	255	313.6	330	NM_001392	GATCCTCAGGAAACCCTGGTACTGGCAGCAGCCAGCCTCTGCTGTGCCCACATGACCCACAACTCTGGCAGCGGACCCGGCACTTCCAACATTATTAAATAATAAGAAAGCGGCTCCTACTCCAGGCTCAAACCTCCCTGCAGACCAATGGACACCTTCTAAGAGTTTGGCGAGTCAGTGACTGAAGCGCCCGTCCATTCCAAGATAAATAGGATTTACCAATCCTTGGATGAAGTGCTTGGGAAGTCTTTAAGTGCCATAATCAACTGCCATTTCAAAGAATATAGATGGTTTTGAAAAGTTCATGCTGTCCCTTCATTGAATTTTAGA
51631	LUC7L2	4612	381.643104943625	388	NM_001270643	GACGGCTTCTGGCGGGTGGCGGTGTTGAAGGCGAGAGCTTGCTTGGCCCGTGTCGCTTCTGTCCCAAGAACCGGACGGAGAGTGAGGGCACGAGGGTCGCTGTCGGGGGCTGTCGTCTTCCACGTACACGTCGTCGTGAGGAGCGCAGTCCGGACTCTTCCCGCAACCCCTCCGGCTCCCTTTCCGCACGCCTCGAGGCGGCGGCGGCCACCGAGACAGCAGCGCACCTTCCCCCATCCCTTCCCCTTATCCCCCAGCCCAAAAGGGCCCGGTCTGCGCCCCACCCCCGCCCGTCCGCCCGCTACGCCGCCGCCATGTCGGCGCAGGCCCAGATGCGCGCGATGCTGGACCAGTTGATGGGCACCTCCCGGGACGGTTCAATGTATCT
79650	USB1	632	66.10917721519	66	NM_001195302	AGCGGAACTCCGGGTGCCGGTTGAGGTTGCTGGTGGACCTGCTCTGGTGGTCTTGGATGAGGCCCC
78995	C17orf53	120	127.008333333333	85	NM_001171251	ACCTGGGTCGTGTCCAAGGCCCCGGCGACTCCCCGGACTCGGGGTGCCGGGCCAACCTCCCCGCCGAGGCCCACCCGCCGTCGCT
8930	MBD4	1745	159.444699140401	135	NM_001276272	GTCTGGGGCGCTTTCGCAACATTCAGACCTCGGTTGCAGCCCGGTGCCGTGAGCTGAAGAGGTTTCACATCTTACTCCGCCCCACACCCTGGGCGTTGCGGCGCTGGGCTCGTTGCTGCAGCCGGACCCTGCTCG
7444	VRK2	69	421.608695652174	376	NM_001288839	GGACTGTAGGCCCGGGGGCTCCGCCTCGTCGCAGCGGCAGGTAGGAGGCGGTGCGCGCGGCCCGGCGACGGGGGATCCTGAGGCCCGAAGTGATGCCACCAAAAAGAAATGAAAAATACAAACTTCCTATTCCATTTCCAGAAGGCAAGGTTCTGGATGATATGGAAGGCAATCAGTGGGTACTGGGCAAGAAGATTGGCTCTGGAGGATTTGGATTGATATATTTAGCTTTCCCCACAAATAAACCAGAGAAAGATGCAAGACATGTAGTAAAAGTGTCAAAAAGTGGATAGAACGCAAACAACTTGATTATTTAGGAATTCCTCTGTTTTATGGATCTGGTCTGACTGAATTCAAGGGAAGAAGTTACAGATTT
56655	POLE4	393	8.312977099237	2	NM_019896	GG
79863	RBFA	55	5.94545454545499	8	NM_024805	GCCGCGCC
64837	KLC2	150;150	209.52;246.52	231;268	NM_001134774;NM_022822	GAGCCGGCCCGGCCCGCGCTCCTTTAAGGCAGCGAACGGGCCAAGAGAAGCGTGTTTCGCCCCCTCCGACGCCACCGAGGTAGCGGCTTCACCTTTAAGGCGGCGCGGGGGCTGCTGGGAAGGCCGGCGGGATGGAGGCGGCGGGACCGGCTCGCGGGTGCGGGTCCGGGTGAAGCGGGAGGCAGCCAGAGTCGGAGCCGGGCCCGAGCACCAGGCGCAGACGCCACAGCC;GAGCCGGCCCGGCCCGCGCTCCTTTAAGGCAGCGAACGGGCCAAGAGAAGCGTGTTTCGCCCCCTCCGACGCCACCGAGGTAGCGGCTTCACCTTTAAGGCGGCGCGGGGGCTGCTGGGAAGGCCGGCGGGATGGAGGCGGCGGGACCGGCTCGCGGGTGCGGGTCC…
10933	MORF4L1	1364;1336	260.101906158358;334.65868263473	331;363	NM_001265603;NM_001265605	GGCTGGAGCAGCGGCTGCGCGGGTCGCGGTGCTGTGAGGTCTGCGGGCGCTGGCAAATCCGGCCCAGGATGTAGAGCTGGCAGTGCCTGACGGCGCGTCTGACGCGGAGTTGGGTGGGGTAGAGAGTAGGGGGCGGTAGTCGGGGGTGGTGGGAGAAGGAGGAGGCGGCGAATCACTTATAAATGGCGCCGAAGCAGGACCCGAAGCCTAAATTCCAGGAGGTTGGGATGAATGGGTTCCGGAGAGCAGAGTACTCAAATACGTGGACACCAATTTGCAGAAACAGCGAGAACTTCAAAAAGCCAATCAGGAGCAGTATGCAGAGGGGAAG;GGTGGTGGGAGAAGGAGGAGGCGGCGAATCACTTATAAATGGCGCCGAAGCAGGACCCGAAGCCTAA…
8131	NPRL3	659	266.660091047041	312	NM_001039476	CATCAGCGTGATTCTGGTGAGCTCGGGGAGCAGGGGCAATAAGCTGCTGTTCAGGTACCCCTTCCAGAGAAGCCAGGAGCACCCGGCGTCCCAGACAAGTAAGCCGCGTAGCAGATACGCTGCCAGCAACACGGGCGACCATGCTGATGAGCAGGACGGCGATTCCAGGCCAACGCAGACCCGTCAGTGATAAACTGTCTGCATAACCTGTCCCGTCGTATCGCCACCGTGCTGCAGCACGAGGAGCGCCGCTGCCAGTACCTCACCCGGGAGGCCAAGCTGATCCTGGCGCTCCAGGATGAGGTGTCCGCC
7247	TSN	4491	114.642618570474	123	NM_001261401	GGCGTAAGACCGGGGGGACGCGGCGGTAGCGGCGGCCGTTGCGATTGATTGCGCTGGTTGCCTGCGGCGTCCACTTCCTTGGCCGCCCTTGCTACACTGGCTGATTGTTGTGCAGCCGGCGCC
26005	C2CD3	140	118.285714285714	114	NM_001286577	GCCCAGCGGCGCCGGTTGCCGGGGAACGCAGGCGCCGTGGGGAGGGATGGCGGGAGGATACTGCTTAGGTGCTGGAGACGGAGTTGAGCTGGTGAAGAAGAGCTCGGGCTCATC
10390	CEPT1	824	153.717233009709	149	NM_006090	GTGCTGCCGCCGATCAGTCACCCAGTCGGCTGGAGTCGGAGGCGATATTTCTAGGGGTGTACTTGTTGGGGTCAGGGTAAGCACCAGCCACAAAAACCTACAAAAGAAGGGAAATTACTGTCTTTAAATATTAAAAAAAAACAAGATCC
84522	JAGN1	1079	100.734939759036	107	NM_032492	ACGGAGCCGCGCGGCTGCGGGGGCGCAAATAGGGTCAGTGGGCCGCTTGGCGGTGTCGTTGCGGTACCAGGTCCGCGTGAGGGGTTCGGGGGTTCTGGGCAGGCACA
26036	ZNF451	861;861;861	71.385598141696;71.385598141696;71.385598141696	70;70;70	NM_001257273;NM_001031623;NM_015555	GGGGATTCGTGGCGACGGCGGCGGCAGGGACAGCAGGAGCAGTGGTGCTGTCAGCGCGGCCGTCGGAGAC;GGGGATTCGTGGCGACGGCGGCGGCAGGGACAGCAGGAGCAGTGGTGCTGTCAGCGCGGCCGTCGGAGAC;GGGGATTCGTGGCGACGGCGGCGGCAGGGACAGCAGGAGCAGTGGTGCTGTCAGCGCGGCCGTCGGAGAC
26999	CYFIP2	159	108.188679245283	111	NM_001291722	GCAGCGGAGCGGGGCAGAGCATCCTGCGCCCCGGCGCGGGGCCCTGCGGTAGCCTCAGGCCCCTCCCCTGGACCCGCCGCAGAGCCAGTGCAGAATACAGAAACTGCAGCC
51035	UBXN1	6046	147.639265630169	156	NM_015853	GGCTTTCTTCTCGTCGGTGTTCCCGGCTGCTATAGAGCCGGGTGAGAGAGCGAGCGCCCGTCGGCGGGTGTCGAGGGCGGGTTGCCTCGCGCTGACCCTTCCCGCCCTCCTTCTCGTCACACACCAGGTCCCCGCGGAAGCCGCGGTGTCGGCGCC
729991	MEF2BNB	245	98.236734693878	43	NM_001145783	GGGCTTCCGGTGCCGTTTCCCGGTTCGCTCGGCCGCGGTCGCT
55128	TRIM68	142	204.429577464789	204	NM_018073	GGGTTCTGGGCCTCTGCCGCTCTCTGGCCCTAAGTGCTGAGCTGCCGGGAACGGCAGCTTCTGACGCTGGGCCATTGGACGCTGCGGAACCAGGCTTCTTCACTTTGAGTTTCCGCCGCGAAGCGCCAGTCCGGGCCGAGGAGGGAGCCTTTACTACTTCTCCCTGGTTTCATTCATGTTCTGAGGAGGGTGTGAGAAGGAACC
123016	TTC8	664	704.063253012048	695	NM_001288783	CCTGGAGCGCTGGGCCTTCGCTGGCCGCACCGGCAGCCATGAGCTCGGAGATGGAGCCGCTGCTCCTGGCCTGGAGCTATTTTAGGCGCAGGAAGTTCCAGCTCTGCGCCGATCTATGCACGCAGATGCTGGAGAAGTCCCCTTATGACCAGGCAGCTTGGATCTTAAAAGCAAGAGCGCTAACAGAAATGGTATACATAGATGAAATTGATGTAGATCAGGAAGGAATTGCAGAAATGATGCTGGATGAAAATGCTATAGCTCAAGTTCCACGCCCTGGAACGTCTTTGAAACTCCCTGGAACTAATCAGACAGGAGGGCCTAGCCAGGCCGTTAGGCCAATCACACAAGCTGGAAGACCCATTACAGGTTTCCTCAGGCCCAGCACGCAGAGTGGAA…
6717	SRI	2596	30.715331278891	34	NM_001256891	ACAGGGCGAGGGCGGCTGCGGCGCAGTCTGCAGC
2968	GTF2H4	213	193.50234741784	194	NM_001517	CCCCTTACCTCCCTTCTCTTCTGAATTCTCCATTCTGGGCTCTTGCCTGTGAAATCTTTCTTTGCTTTCCCCATCTTTTCCTCGCATTTTTTCACCATCTTTCCCTCAATCTCCAGGAGCCAATGCGAGACTTTGGCTCCGATTAAGCGACGGCCCGAGACTCGGGGTGCGCGAGGAGGATCGACAGAGTGGTG
79159	NOL12	1935	42.0485788113695	35	NM_024313	GTCTTCAGGGAGAGGAAGCCGGCGGCCTCACTGCT
27314	RAB30	721	256.00693481276	218	NM_014488	GACTCCAGCCCTTGGACTCAGGACATCGCAGACCTTCCCTTGCGTGCGTGACTCATTCGCACATCCATTTCTGTTTATGCCTGGGGTGGGGAGAAAAATCCCAAACCAGCTCCATTGGATATGACTGTGCACTGGAGCCGGTTGTGCTGTTCTCTCAGCTGTACACACCCATCAAATCACAGTGCCCCTGAGGACGAGAGAAAATTGAAGCTGTGTAA
84343	HPS3	115	49.678260869565	37	NM_032383	AGGGCGGGCAGGCTGTGCCATCCCGCCGGACGTCGGG
9167	COX7A2L	7822	50.3536180005114	59	NM_004718	GGTCCTTCTCTGGGGCGGTCGCGTTGGCAGCGGATGCGGGAAGCCGGACTCTGGGCGTC
10150	MBNL2	998	376.420841683367	105	NM_144778	CAGACTTACATGTGGGAGTTTTCACAACAGTAGTTTTGGAATCATTAGAACTTGGATTGATTTCATCATTTAACAGAAACAAACAGCCCAAATTACTTTATCACC
1508	CTSB	7921;7921;7899	231.888271682868;186.888271682868;274.921382453475	231;186;274	NM_147781;NM_147783;NM_147780	GGCTGCAGGGCTCCGGCAACCGCTCCGGCAACGCCAACCGCTCCGCTGCGCGCAGGCTGGGCTGCAGGCTCTCGGCTGCAGCGCTGGGTGTCTTCAGGCCTATGGAGAGCAGCTTGCGTGGGCTGGGCCTGCAGTACCTGGTTTGCATAGATGATTGGCAGGTGGGCAGCACGGGGAAGGACCTGTGAGTGGCCAACCTGGTTCAGGTGGATCTAGGATCCGGCTTCCAAC;GGCTGCAGGGCTCCGGCAACCGCTCCGGCAACGCCAACCGCTCCGCTGCGCGCAGGCTGGGCTGCAGGCTCTCGGCTGCAGCGCTGGGTGTCTTCAGGCCTATGGAGAGCAGCTTGCGTGGGCTGGGCCTGCAGTACCTGGTTTGCATAGATGATTGGCAGGTGGAT…
94121	SYTL4	6281	169.487024359178	103	NM_001129896	CTGCCTCAGCCTCCCAAAGTGCTGGGATTACAGGCAACTCTGGTAGCTCTCCTTGTCTGGTTGTTTTGAAGAAAGAAGAGTAGAAGAAAAAGTTGAGTAAATC
7627	ZNF75A	92	558.086956521739	606	NM_153028	TGGATACTCGGTGGCATTAACCCTTCCCTACCGCCGGGGAAGACAGCAGTTTCTCTGGCGAGGAAGTAGGCCGGGCTCAGGCGCCTTAGCCAGAGGGCGGGCCTGCGCCACCCTCGGAAAGCGTCACTTCCACTTCCGGCCGGCGCTCTGGCTCTGTACCTGGACAGGGCTGCGGTAGGCCAGCGGTGGGCTGGCGGTTGCGCTCCTCAGATCGGCGGCCTTTCGGGCGGTGGCTTGCGTTTGAGCCTCAGAAAGCGAGGAGCGGCCTCCACGGAAGCCAAGCTGGCCGAGGTTGCAGTCCATGAGCTGGGAAAGGAGGCAGTGCTCTTGGGAGAAACAGCAGAGGCCTCAAGTTTCGGGCTGAAGCCAACAGAGTCCCAACCAGTGGGCGTATCCCAA…
123207	C15orf40	616	17.1412337662338	16	NM_001160113	GCCTTCCCAGGCGGGG
8204	NRIP1	88	156.772727272727	59	NM_003489	CAGAAAACCATTCTTTAAAGTGAATAGAAACCAAGCCCTTGTGAACACTTCTATTGAAC
5985	RFC5	1652	85.345641646489	83	NM_007370	GGGTCAGGTCGCGGCTGGTCACTGTGCAGGCGCTTGGGTGACGCGACGATCTCAGCGGATCTGGTCACCTTCGTCTCCCCGCC
79758	DHRS12	473	54.2198731501057	54	NM_001270424	AGGGCGGAGGCCGCGCCGGGAGCGCGGTGGGGCTAGGCGTGGGGCGCTCCCGGC
4850	CNOT4	1708	303.790398126464	306	NM_001008225	GGAGGAGTCTTACCCTAATGTAAGATGGTGGCCCGTCTGGCTGTGGAACCCACCGAAAGCTGAGAGTCTCTCTCTCAGCCGTAAAGGTCGGACTCGCTGAAGCAATCAGGCCCGGTTCTGAAGAGTTTTTTCCCCGACGCTCGTTCGGTGGTTTCTTGTGAGGACGCGGCAGCCCGTGGAGTCGGCTGAGGGAAAAGCGAGGCAAGGCAGGCGGGTCGTCAAAGTCCTACATTTTAGCTTTCAGTGCTGAACTTCCTTCTCCCTTAAATTATTATAAACTTTTGCTGCTGTTTAATAAACGTGAAG
92335	STRADA	678	150.402654867257	132	NM_001165970	CCCAGCAACCGGTCTGGCGGCGGCGCGGCAGTAAAACTGAGGAGGCGGAGCCAAGACGGTCGGGGCTGCTTGCTAACTCCAGGAACAGGTTTAAGTTTTTGAAACTGAAGTAGGCCTACACAGTAGGAACTC
26123	TCTN3	516	34.554263565891	24	NM_015631	GGACCCGGAGGCCCTGAATGCCCC
80222	TARS2	6794	23.498675301737	28	NM_001271895	GAGGATGTAGGCACTGGTGTGAAGGAAC
55634	KRBOX4	146	214.452054794521	211	NM_001129899	GGGAGGGCGGTCCCTAGTTCACACTGGCTGTTGTCAGCGGCCTCTGAGGTTTCAGGCTCTTGGCGGTGAAGGTCAGAGTGCAGACCTGAGACCACTGCTCACCGACTTCAGACTCCAGTTTATCTGTGCCCCAGCTTCCTCACTTAGTCTCAGAAGACTTAGGCTGAGGCCTCAGAAGGAGATCTCCATCCTTTGTCCAGAGCAGAACAGG
80823	BHLHB9	109	626.009174311927	625	NM_001142527	GCATTAGGCCTGCCGAGAGGAGTGTTTTCTTGCATCCAGAAAAGACCTGAGAGGCGGACGACACCTGTGCTCCGCAGAGCAGAACGTGGGAGGAACGGCGGGATGTTAAGGTAGGAGCTCAAGAAGCAGAGAGTCTACCTGCCCGACGCGTTCGTGGAGAGGAGCAGCGGTTGCTGTTGGAGGAGGTGGGTGCAAGGACGGCAGATGGCATCCCTGAGAGGTGGTGACTGAGACTAGATGCGGGTGCAGGTTCCTGTAGAGATCTGTATGTAGCTGTTCACTTGGAAGTTAATTAAGAAAGAACAAAAACTATTCATTTGGATTCAAGGTCCATCTCCACTGGTGGCTGTGGTGGCTTTGGATTGTTGGAAGACCATCACCTTCAGCAGGTCTGCACTT…
6281	S100A10	1020	110.664705882353	82	NM_002966	GCCTCTCCGCCCCGCGTCCAGCTCGCCCAGCTCGCCCAGCGTCCGCCGCGCCTCGGCCAAGGCTTCAACGGACCACACCAAA
26010	SPATS2L	114	177.684210526316	120	NM_001100422	GTGTTTGCGAGCGGGAGCGAGGGGCGCCGGCTGGGGTGTGTGCTCCTGAGCTCTTCAGAAACCAGGCTGCTTTCAGGAACATTGCTGTGGATTCCCAGGGCCTATTCCACTAGAAGCAAG
8763	CD164	13191	75.771889924949	74	NM_001142403	GCCGCAGGGGATTGAGGGGTTGACTGAGCGTTGCGAGCCTTAGCTTTCTCCCGAACGCCAGCGCTGAGGACACG
27335	EIF3K	4956	82.734866828087	61	NM_001300992	GAGGACGCCGTGCCGGGTCAGTGTTAGCCTCCAGCCCTGGTTGTGGAAGGCGACAGAAGTC
246243	RNASEH1	2739;2728	644.036874771815;55.287023460411	639;50	NM_001286837;NM_002936	GCCCACGCTGGGCCGGGAGTCGAAATGCTTCCCGGTGCCGGGAGTGAGCGATGAGCTGGCTTCTGTTCCTGGCCCACAGAGTCGCCTTGGCCGCCTTGCCCTGCCGCCGCGGCTCTCGCGGGTTCGGGATGTTCTATGCCGTGAGGAGGGGCCGCAAGACCGGGGTCTTTCTGACCTGGTGAGTGGCCCGCCCGCCGAGGCGCCTCCCTGCCGGCATCGGGGTCGAGGGAGGCCGGAGCCCGGCTAACCCCGGCGGCGGGAGCCTGGCGGTCCGAGTCTGTGCCGCGCGCTGTGGCTGTGGGTGGTCGGGGGACCGCCTCGTTTTCCTGCTCGGCCGGCGGGGTTCCAGGAGGCTCATGGCCTGGGACTGGAACGCACCGAAGACTTGTTTGAAATATC…
1509	CTSD	20349	18.529362622242	18	NM_001909	GACCCGGCCGCCGCCGCC
1838	DTNB	73	101.095890410959	86	NM_183361	GAGGGGGCTGGGCCGGAGCGTGCGGAGGAGTGAGGCCGCAGGAGACCTTCCCGACGACCCCTGCTCCGGCGGGGAAGTGAGCAAGG
10138	YAF2	62;62;62;62	79.774193548387;79.774193548387;79.774193548387;79.774193548387	80;80;80;80	NM_005748;NM_001190977;NM_001190980;NM_001190979	TCCGCCCGGCTTATTATCCTCCTTATTGACAAACAGAGCGGTCGCGGCGGCGACTCTCGGCGTGCGGTGATAGCCAAGCC;TCCGCCCGGCTTATTATCCTCCTTATTGACAAACAGAGCGGTCGCGGCGGCGACTCTCGGCGTGCGGTGATAGCCAAGCC;TCCGCCCGGCTTATTATCCTCCTTATTGACAAACAGAGCGGTCGCGGCGGCGACTCTCGGCGTGCGGTGATAGCCAAGCC;TCCGCCCGGCTTATTATCCTCCTTATTGACAAACAGAGCGGTCGCGGCGGCGACTCTCGGCGTGCGGTGATAGCCAAGCC
7341	SUMO1	13343;13378	111.244847485573;111.082000298998	115;115	NM_001005782;NM_001005781	GCAGCCGCGGTGTTGTGCTGTGGGGAAGGGAGAAGGATTTGTAAACCCCGGAGCGAGGTTCTGCTTACCCGAGGCCGCTGCTGTGCGGAGACCCCCGGGTGAAGCCACCGTCATC;GCAGCCGCGGTGTTGTGCTGTGGGGAAGGGAGAAGGATTTGTAAACCCCGGAGCGAGGTTCTGCTTACCCGAGGCCGCTGCTGTGCGGAGACCCCCGGGTGAAGCCACCGTCATC
64425	POLR1E	727	94.716643741403	102	NM_022490	GCCTTTTCCGGCCCGCAGCGCGGCCTGGGCTCCCGCGTGTTTAAAAGTGCGCTTGTGGCTGCTGCTGTCTTAACTCCTGTGCTTGGCGGACAGACAGGCGAG
26098	EDRF1	130	103.038461538462	99	NM_001202438	GGTCCGCGGAGCGTCTCTGGCGCTTACCCTGCTTTGGGCCTGCGTTGCTGCTGCTGCTCCTCCGCTCCCCCGTCGTATCGCCTGCCCTGGATCGAAGTG
64965	MRPS9	670	21.298507462687	18	NM_182640	GGAGCTCCCACAGCTAAC
51256	TBC1D7	211	239.464454976303	251	NM_016495	ACGTCCGGCGGCGGCGGCAGCGGCAGCGGCAGCGGCGCTGAGTTTTGTCTCCCGGGCCGTCTGGGCGCGCGCGGGTGTCCCAGGTACCCCGCCGCCTCCCTCCTTCCCGCAGGACTCGTCCCTCCTGGCCCTGGGCCCCAACGGTGCCCGCCTGCCCGGCGGTCGGTCAGCGCACAGGGCACGGCTTCCTCTGCTTCTCCCGGACCACTTAGTCTCAACCCGGGTGTGTTTGCACTACTAGAGAATGAAAT
90293	KLHL13	437	325.897025171625	334	NM_001168303	CCCACACCCTGGTGAGGTCAGGCGGAGGCTCTGCCGCTGCGGCCGCAGTAGCTCAGCTCCTATTCCTGGGAAGCCTGGAACGGGGACTTTTGAAAATAACTGCAGCGGCATTCGGGTTAGGGTCCGTGCTCTCCGCCTGCGCCAGGACAGGGTGAAGTGGTCGGGGCGAGCAGAGGGTGCGAAGGTGCGGGTGCTGGTGCCTCGCAGCAGGAGGGAGCCCCGGCTGCGCCGCGCGACTCCCTCTTTGGCCCTCGGAGCGCAGCACCCGGCGGACAAGCGGCGGGACGCCAGGACGCGGCGAGCAAGATCTCTCGTGGAAGAGGAAGACCAACAC
4953	ODC1	53;53;53;53	293;6;6;6	293;6;6;6	NM_001287188;NM_001287189;NM_002539;NM_001287190	GAAATCATGAACAACTTTGGTAATGAAGAGTTTGACTGCCACTTCCTCGATGAAGGTTTTACTGCCAAGGACATTCTGGACCAGAAAATTAATGAAGTTTCTTCTTCTTCAAATGTAATGATAGCAAAGCCATCGTGAAGACCCTTGCTGCTACCGGGACAGGATTTGACTGTGCTAGCAAGACTGAAATACAGTTGGTGCAGAGTCTGGGGGTGCCTCCAGAGAGGATTATCTATGCAAATCCTTGTAAACAAGTATCTCAAATTAAGTATGCTGCTAATAATGGAGTCCAG;GAAATC;GAAATC;GAAATC
56937	PMEPA1	554;129	122.833935018051;455	143;455	NM_199169;NM_020182	GGCTTCCGGGCGTGTCTACGCGAGTTCCCGTCTTTCCTGGTCGTCCTCCTTGGGTTCGGGTGAAAGCGCTTGGGGGTTCAGTGGGCCATGATCCCCGAGCTGCTGGAGAACTGAAGGCGGACAGTCTCCTGCGAAACCAGGCA;GGCAGCCCCGTCTAGCGCTGACGTCAGACCGTCTGCCTGCCTCCGACCGCGGTCTCGGAGCGAAACCCGATCTCCTTGGACTTGAATGAGGAGGAGGAGGCGGCGGCGGCGGCGGCGGCGGAGGCGCTCGGCTGGGGAAAGCTAGCGGCAGAGGCTCAGCCCCGGCGGCAGCGCGCGCCCCGCTGCCAGCCCATTTTCCGGACGCCACCCGCGGGCACTGCCGACGCCCCCGGGGCTGCCGAGGGGAGGCCGGGG…
7551	ZNF3	6968	254.821900114811	235	NM_001278284	GTGCTGGGATTACAGGCGTGAGCCTCCGCGCCCGGCCGCATTGGCATCAACAAAAGTCAGAATTCCCGGGAACTTGAACAGAGGCTGCTAAATTCCCAGTAATTGCTCCTTTGGCCTTCTAGGGACTGACTTCAAAGAAGGAAGGAAAGAATCAGGCAGTGCTTCCTCATTCTCTTTTAAAACCCGCTTCCCGCTGAGTCTGCACCCAGGAGACCAGAGAGCACCTTGCCCTTCC
66008	TRAK2	338	398.843195266272	400	NM_015049	GCCATTGACCCGGTGTCGCCGCAGAACCGAGGTCGCCGAGTGATGATGTTGTGAAGTCGCCCGCCTGTCCCTGCCACGCCCGGGCGGTTGCTGGCAGTGGGAGCAGCGGCAGCAGCTTCGGCTGCTGCTTTCAGGCTGCCGCTGCATTAGGGGCTTCCTGAGGAAGCGCGGGCGGACGACAGAGGATGCCGAACCACTCCAGTCATGACTGTCCAAAGTATGATAATCACATGAGAGTGCTCGTTGCTACGGATGTCATTTGACTCATCAGAGAAAATCTGTCTAAAAGAAAATATCCATGTGACCAAATCCATTTCATTATTGAATGGCTTGATGGATTTCCTTTACTCTGATTCATACCAAAGCTGTCCTTCTCAACCAAAGCAAGAAAGGATCCTGC
126382	NR2C2AP	2753	338.550671994188	349	NM_001300945	TCCGGGTCCCAAGATTTGGCTCCAAGAGCTATTCGCAGAGAAACAGCCTCGCACAAAAAGCCACCGCCCCCGAAACCCGCGGGAAATCTGTTTCCTGTGAAAGGCCTGGCCTCCGGGCATTGGCGGTTTCCCTGATCCTCTCTCCCAAATTTTCCGGCAGGGGATTGATCGAGGCGACATTTAGGACTGGGGTGGGCGAGGGAGTGGCGGTTCTCGTCCCAAGTTACAGGTGAGGACGTTCAGGCCAAGGCGTAGCCAAGATCGCGCCGCCCTGTAGCTTGAGGAGGCGCCGGGATTCGAACCAAGGCTGTGCCCAATCCTAAGCCCTGCGAGGTCTTGTGGAACCGAC
145389	SLC38A6	269	102.323420074349	52	NM_153811	AGGGCAGGGGTAGAGGCTCGTAGATGGAACTGGTAGTCAGCTGGAGAGCAGC
84986	ARHGAP19	75	23.946666666667	24	NM_032900	GGTGAAAGAAGTTTGCTGACGAAG
253943	YTHDF3	1796;2102;2102;2102	316.837973273942;263.224548049477;447.224548049477;400.224548049477	323;257;441;394	NM_001277817;NM_152758;NM_001277815;NM_001277813	GAGACTAGGGAGTCTGTCCGCCATTGTGGACCCGAGAAGCAGAGAGCGAGAGGGGGAAGAGGAGCGTGCAAGCGGAAAAGACGGGCCTCTTCCTCCGACTCCCGAGCGCGAGGCCCTCATTTTGGGTTCTCAGCGAACGGCGGCAGCGGCGGCGGCTGGAACAATCACTCGGCCAAGGGCGACAGCCAACTGCTAGACCTAAAGGGCAAGGAAATAAAGTTTCAGTACAAAACGGTTCGATTCATCAAAAAGATGCTGTAAATGATGATGATTTTGAGCCATACTTAAGTAGCCAGACAAATCAGAGTAACAGCTATCCACCA;GAGACTAGGGAGTCTGTCCGCCATTGTGGACCCGAGAAGCAGAGAGCGAGAGGGGGAAGAGGAGCGTGCAAGCGG…
55100	WDR70	653	77.8667687595712	76	NM_018034	GCCGCAAGTTATTGGCAAGTTCCCCTGCAGTTGTTTGGGCTGTCCCTGTGGCTGGTTCTGGGGTGTGCGGCCAGCC
5682	PSMA1	957	88.460815047022	87	NM_001143937	CTCTGTAGATCGCTGAGCGATACTTTCGGCAGCACCTCCTTGATTCTCAGTTTTGCTGGAGGCCGCAACCAGGCCCGCGCCGCCACC
7322	UBE2D2	617	637.849270664506	689	NM_003339	AACGGTCGCGGCGCTGGAGCCTGCAGAACTCGCGCTCTAGATCTCGCGAGATCTCCGCCCAGGGCTTCGCAGCGTCACGCCCTCCGGGGCCGTGGCGGCGACGGCGGTGCGTAGCTTACTCACAGGGGCGGCCCGTATCCCTCCGCCGCCGGCGCGGCTCGGCCCTCCCTCCCCTGGCCCGCCAATCCCCGCGCCTCCCGACCTGCCCCTCGGTCGGGCCCACCCCGTGCTCCGACGGCCCCACCCCGGCGGCGCAGCCCGCCCGCCCGCGCGTCCCTCGGTCCACCTGCAGCAGGGAGGAAGACAGGCAATCCCTCCGGCTGTCCGACCAAGAGAGGCCGGCCGAGCCCGAGGCTTGGGCTTTTGCTTTCTGGCGGAGGGATCTGCGGCGGTTTAGGA…
128387	TATDN3	624	18.128205128205	18	NM_001146170	GGCAGCCGCCGGGGCGCA
7013	TERF1	151	22.6423841059603	20	NM_017489	ACCCAAGCGAGCCATTTAAC
10781	ZNF266	242	873.210743801653	687	NM_006631	CACCTCGGCCTCCCAAAATGCTGGGATTACAGGTATAAGCCACTGTGCCTGGCCAAAGATACCGTTAACCCTGGATAAAGAGAATGGAGGTTACCTCTGTCCGTGTAGATTCCTAAGCTGTCCTGGAGTGATCCTTGGAGTAAAGGAAAGGTGCTTTGAAGCACATTCAGCCATCAGCCCTGTGGGATGGCAGCCACTGATTTGTCCTATGGTCTTTACAGGGACCCAGTCTGCCTTCAAGAAAAGACAGAAGTAGAAAGGGTGGTGGCTGACTGTCTGACAAATTGTTATCAGGTATGCAGGAAGTATATCCTTCTCCAAAATATCATACTTGCATCACCAGGTAGACACATTTCCTTCTACACAGAATTATCTTCAGAGCTTCTTAAAGCAAATAAA…
11130	ZWINT	925	24.76	15	NM_001005413	TCGGCGCCTGGAAAG
7388	UQCRH	6320	253.181487341772	267	NM_001297565	GCCGGATTTCCGCTGAGTGACCCTTACAAGTCCTTCTTGATCCTGAACTGGGTTAGGTGCCGCTGTTGCTGCTCGTGTTGAATCTAGAACCGTAGCCAGACATGGGACTGGAGGACGAGCAAAAGATGCTTACCGAATCCGGAGATCCTGAGGAGGAGGAAGAGGAAGAGGAGGAATTAGTGATAGGACTGAGGCTTTCAGTGCATACTGGCAACCTTGGAAGGCAGGAATGTGAAACTTTTCCCTACTACTTAGCATCAGAATTGA
25836	NIPBL	547	390.623400365631	390	NM_015384	GACACCACCAAGCCGCAGGGAGGGACGCCCCCGCCGACAGGAGAATTGGTTCCCGGGCCCGCGGCGATGCCCCCCCGGTAGCTCGGGCCCGTGGTCGGGTGTTTGTGAGTGTTTCTATGTGGGAGAAGGAGGAGGAGGAGGAAGAAGAAGCAACGATTTGTCTTCTCGGCTGGTCTCCCCCCGGCTCTACATGTTCCCCGCACTGAGGAGACGGAAGAGGAGCCGTAGCCACCCCCCCTCCCGGCCCGGATTATAGTCTCTCGCCACAGCGGCCTCGGCCTCCCCTTGGATTCAGACGCCGATTCGCCCAGTGTTTGGGAAATGGGAAGTAATGACAGCTGGCACCTGAACTAAGTACTTTTATAGGCAACACCATTCCAGAAATTCAGG
83606	GUCD1	1390	160.322302158273	174	NM_001284252	TGGCGGGCCTAACACCCAGAATTCCACTCTTTCCCAAAATGCTGCGCGCAGGGCCCGCCTCCTTCCTTTCCCCAGTGTTGAGCGCGGTCTCGCCTCCGCTTCCTCCTCACTCCGCCTGCCGGCTGGGAAACTAGGGCACCAGTACGATAGTTCCGGCACCGGAAAAGAGGGCTG
60561	RINT1	1601	121.291692692067	115	NM_021930	GTGGCACTCAGTCCTACGGCCTCCGAGGCTGGGTAGTGAGTGTGTCGCTGGCCTTAGCCAGACTCCACAGGCCACGCTGGCTGCGAATGGAGCCGAGGACTCGCGCGGAGGCGAG
2990	GUSB	577	243.584055459272	234	NM_001293105	GAGCCCGTCGCGGGAGTGCAAGGAGCTGGACGGCCTCTGGAGCTTCCGCGCCGACTTCTCTGACAACCGACGCCGGGGCTTCGAGGAGCAGTGGTACCGGCGGCCGCTGTGGGAGTCAGGCCCCACCGTGGACATGCCAGTTCCCTCCAGCTTCAATGACATCAGCCAGGACTGGCGTCTGCGGCATTTTGTCGGCTGGGTGTGGTACGAACGGGAGGTGATCCTGCCGGAGCG
5241	PGR	204;50	481.348039215686;367.54	479;15	NM_001271161;NM_000926	AGGCAAAGGGTCCCCGGGCTCCCCACGTGGCGGGCGGCCCGCCCTCCCCCGAGGTCGGATCCCCACTGCTGTGTCGCCCAGCCGCAGGTCCGTTCCCGGGGAGCCAGACCTCGGACACCTTGCCTGAAGTTTCGGCCATACCTATCTCCCTGGACGGGCTACTCTTCCCTCGGCCCTGCCAGGGACAGGACCCCTCCGACGAAAAGACGCAGGACCAGCAGTCGCTGTCGGACGTGGAGGGCGCATATTCCAGAGCTGAAGCTACAAGGGGTGCTGGAGGCAGCAGTTCTAGTCCCCCAGAAAAGGACAGCGGACTGCTGGACAGTGTCTTGGACACTCTGTTGGCGCCCTCAGGTCCCGGGCAGAGCCAACCCAGCCCTCCCGCCTGCGAGGTCACCA…
51599	LSR	93	105.440860215054	97	NM_205834	GTGGCTCGGAGGACCGCGGCGGGTCAAGCACCTTTCTCCCCCATATCTGAAAGCATGCCCTTTGTCCACGTCGTTTACGCTCATTAAAACTTCCAGA
29105	CFAP20	881	252.508513053348	269	NM_013242	TCCATTGAAGGCGGGGAAATACCGCGGCGCGGACGGTAGTTGCTGTGGTTTCCGTTCTGAGCTCGCAGCTTAGGAGCTGAAGATCGCGGACTTAGCGTTGCCGCGTCCGAGTCCGGCCATCAGTGGCTGCAGATCCGGAGGCCAGGAGCTCAACCACCCTTCTTCGGAACAGGGCCGGCCTGCTGCTGTGCCCTCGACGCTCGGTGCCTGTATCTACTCCGGGGCCTAGGTCGGCTCCGGGGGCGGCTTAGGAGAAGGCCGCCGGCGAG
10492	SYNCRIP	10629;10629	374.889923793395;374.889923793395	544;544	NM_001159677;NM_006372	GTCAGCGCGGGAGAGAGAAAGAGAGGAGCCGACTCGGCAGGGACTGGGGGACCGGGCCGAGAGTGCGAGCGAGCGAGGGAGGGAGTGAGGGAGCGTGCGAGCCAGAAGGGGAAAGGCGGCCACTCGTGCCTGAGCGACCGCAGAGGGGAGTGGGAGCAGTGGGGTAAAGGAGCGGGGGGCGGGAATAAGAAAGGCCGAGAGAAGGCGGACAGAGGCTAGTGGTGGTGGTGGTGGTAGGGGGAGAAGGAGGAGCTGGAGGAGGGCAGGGGCTGAGGGAGTGAGTGAAGCGGACGCGCGAGGGAGGGGAGGGAAGGGAAGGGAAGGGAAGGGGGGGTCACGCGGGGGCGCGCGCGCGCACCGGGAGCGCGCTCGGAGGCGAGTGGAACTGGATCGGGTTTG…
79762	C1orf115	129	55.697674418605	57	NM_024709	GGGGACCAAAGGTTGGTGTCTTTGCGCTCGGACCTTCGCCAGAGGGGCCGGGACATC
54477	PLEKHA5	73	30.808219178082	27	NM_001256470	GGCGGCGGCGGCGGCTAGGGATCAGAC
1500	CTNND1	4482	386.950022311468	396	NM_001085467	GCCTTTGGCTGGGTGCAACTTCCATTTTAGGTGTTGGATCTGAGGGGGAAAAAAAAGAGAGAGGGAGAGAGAGAGAAAGAAGAGCAGGAAAGATCCCGAAAGGAGGAAGAGGTGGCGAAAAATCAACTGCCCTGCTGGATTTGTCTTTCTCAGCACCTTGGCGAAGCCTTGGGTTTCTTTCTTAAAGGACTGATTTTTAGAACTCCACATTTGAGGTGTGTGGCTTTTGAAGAAAATGTATGTACTGACGGGAAAAGGAGGATAAGCAAGTCGAATTTTTGTCTTACGAACGGCCGGTTTGTGGGCGATGCTGACCTTGAAAGACAGAAATTTTCAGATTTGAAACTCAACGGACCCCAGGATCACAGTCACCTTCTATATAGCACCATCCCCAGG
79142	PHF23	819	175.808302808303	175	NM_001284517	GCGGGAGGCAGTGGTAGAGGGAGGTGGCGGCAGCGGCTAGCGGACTCGAGTCTCAACCGGGCTGAGGCGGACACTTCTGTGGAGCGAAGCAGTGGGAGCATCGAGCACTAGAGGCGGCACCGGGATCCCCGGCTCCGGGGAGGGGGGCGCCGGACCGGGAGGAGGGGAGGGGGCG
6229	RPS24	413	81.021791767554	79	NM_001142282	TTCCGTGCGCGTTGATATGATTGGCCGGCGAATCGTGGTTCTCTTTTCCTCCTTGGCTGTCTGAAGATAGATCGCCATC
132	ADK	255;255	59.094117647059;59.094117647059	59;59	NM_001202450;NM_006721	GACCAGAGAGTGGATGGCAGAGGTGGGCTGTAGAGCCAAAGTGGGGTGGGAGCGCGAAG;GACCAGAGAGTGGATGGCAGAGGTGGGCTGTAGAGCCAAAGTGGGGTGGGAGCGCGAAG
126133	ALDH16A1	1696	48.240566037736	18	NM_153329	AAGCGTTCGGGGTAGGCG
9746	CLSTN3	558	244.865591397849	252	NM_014718	GAGTGAGAGAGTGAGGACGCTGGGCTGGGGGAAACGGGAAGCCGCTGCAAGTCCACCGCCTCAGCTACCCAGATTGGGATCTGCCCAGGCCCGCTTTATGGACTAGTGTGGGCGGCAGGCTCCTTTCCGTCCCTGCCCTGCTGTACCCCGCTCCTTGGAGACCCCCTGTATCCCTCCCGCAAGGTGGAATCCGCAGGCTGGAGGCTCCCAGGGGAGGCAAACGCCTGGCCCTGCCCTGCCCCACGCCGCACC
9522	SCAMP1	2736	64.707967836257	53	NM_004866	CTCGTCTCTCTCTCTGCGCCTGGGTCGGGTGGGTGACGCCGAGAGCCAGAGAG
5936	RBM4	525	78.114285714286	78	NM_001198843	GCCATTTTAGCGTTTTGTCAGAAGCGTCCGCGCCGCGAGGAGGAGGCCCTGCTGGTTTCTGTGCGGGCTCTTGTCAGG
9987	HNRNPDL	266	138.112781954887	21	NM_031372	CTCCTTGCCGGGAGGGCCGCG
51700	CYB5R2	159	146	146	NM_016229	GACTCCAGTGACCCGGCGGGAGGAGAGGCAACTTTCCCTGTCGGGCTTGAGTTGGGAGAGGAGCAGGGCGGCCTTGTAGGGACCCGTCCCTGCTCCTGACCATCACCGTCACTGGGGTCACTGTGCTCGTGTTGGTCCTGAAGAGC
2053	EPHX2	62;62;62;62	222.08064516129;186.08064516129;178.08064516129;65.08064516129	223;187;179;66	NM_001256484;NM_001256482;NM_001256483;NM_001979	GCCCTGGCCTTCGCGCATCTCCCAGGTTAGCTGCGTGTCCGGGTGCTAGGCTGCAGACCCGCCGCCATGACGCTGCGCGCGGCCGTCTTCGACCTTGACGGGGTGCTGGCGCTGCCAGCGGTGTTCGGCGTCCTCGGCCGCACGGAGGAGGCCCTGGCGCTGCCCAGGACTTCTGAATGATGCTTTCCAGAAAGGGGGACCAGAGGGTGCCACTACCCGGCTT;GCCCTGGCCTTCGCGCATCTCCCAGGTTAGCTGCGTGTCCGGGTGCTAGGCTGCAGACCCGCCGCCATGACGCTGCGCGCGGCCGTCTTCGACCTTGACGGGGTGCTGGCGCTGCCAGCGGTGTTCGGCGTCCTCGGCCGCACGGAGGAGGCCCTGGCGCTGCCCAGAGGGTGCC…
56980	PRDM10	445	181.87191011236	163	NM_020228	GATCGGGGACCCGCTGATCTTCCAGCTCCCCTCACCCAACGTCGTGCATGCTGCAGACAGACCTTTCCGTCCTTCATGAACACACGTGTGGTAGACAGATGACTGTCCTGTACCCTGTGCTGCTCTAGGTGTGCCAGACGTGGAGCTGTCCAGTTGGGAGAAG
338645	LUZP2	245	462.673469387755	519	NM_001252008	GACGGCGCGCCCTCCGGGCTCCGGAGCGGCGGCGCCGAACAATCCCCGGCAGGGCTCGCCTCGCCGGTGACATCACTCCTGAAGATACTCCTCGCTCCCAGCGCCTGCCTTCCCCAGGCGTCCGTTCGTGTGCCCGTCTCCGCCTTTCCGCCTCGGAAGAGCGCTCATCACTGGCTGGGGACAGAGCCGGGCACCAAGGAGCGACAGGATCCCGAAGAGAGAGAGAGAAGGCAGCGAGGGAAGGAGGACCCCGGCAGGCAGCAGCATGAAATTCAGCCCAGCGCACTACCTGCTGCCTCTCCTGCCTGCGCTGGTCCTCAGCACCAGGACTATGAAGAGCTAGAAAAGCAGCTGAAAGAAGTCTTTAAGGAGCGAAGCACCATTCTTCGTCAGCTGACA…
3015	H2AFZ	5911	105.973439350364	105	NM_002106	GCAGTTTGAATCGCGGTGCGACGAAGGAGTAGGTGGTGGGATCTCACCGTGGGTCCGATTAGCCTTTTCTCTGCCTTGCTTGCTTGAGCTTCAGCGGAATTCGAA
25821	MTO1	325	69.070769230769	48	NM_001123226	GACCGTCACTCGTGTCAGCTTCAAAGTCAGATAGATTTTTCTCCCAGC
55635	DEPDC1	75	78.92	62	NM_001114120	GCGGCCGCTGGGCCTGAGTGTCGCCTTCGCCGCCATGGACGCCACCGGGCGCTGACAGACCT
768211	RELL1	52	29.25	32	NM_001085399	GCCCTGGGGGAGGAGGGCGAAGCGACGCGGCG
23190	UBXN4	2164	72.177449168207	75	NM_014607	GAAGACGGAGGGCGGAGCCGGCTTCGGGACTGCGGAGACTACACACCGAGCGAGCGCCTGGGCCCGAAGGGAGCG
25792	CIZ1	634	211.847003154574	161	NM_001257976	GCTCCAGCAACAGCAGCAGCAGCTCCAGCAGTTACAGCAGCAGCAGCTCCAGCAGCAGCAATTGCAGCAGCAGCAGTTACTGCAGCTCCAGCAGCTGCTCCAGCAGTCCCCACCACAGGCCCCGTTGCCCATGGCTGTCAGCCGGACTGGACCAGTTTGCA
7170	TPM3	38578;38578;38578;38578;38578;38578;333	68.304888796724;68.304888796724;68.304888796724;68.304888796724;132.304888796724;68.304888796724;58.306306306306	71;71;71;71;135;71;54	NM_001043353;NM_153649;NM_001278189;NM_001043351;NM_001278188;NM_001278190;NM_001278191	GGTGAGAGGAGGCTGCAACGCCGAGCGGAGGAGGCAGGAACCGGAGCGCGAGCAGTAGCTGGGTGGGCACC;GGTGAGAGGAGGCTGCAACGCCGAGCGGAGGAGGCAGGAACCGGAGCGCGAGCAGTAGCTGGGTGGGCACC;GGTGAGAGGAGGCTGCAACGCCGAGCGGAGGAGGCAGGAACCGGAGCGCGAGCAGTAGCTGGGTGGGCACC;GGTGAGAGGAGGCTGCAACGCCGAGCGGAGGAGGCAGGAACCGGAGCGCGAGCAGTAGCTGGGTGGGCACC;GGTGAGAGGAGGCTGCAACGCCGAGCGGAGGAGGCAGGAACCGGAGCGCGAGCAGTAGCTGGGTGGGCACCATGGCTGGGATCACCACCATCGAGGCGGTGAAGCGCAAGA…
9698	PUM1	5829	96.1320981300395	91	NM_014676	GTGAAAGGTAAGGGGGAGCGAGAGCGCCAGAGAGAGAAGATCGGGGGGCTGAAATCCATCTTCATCCTACCGCTCCGCCCGTGTTGGTGGA
51253	MRPL37	351	54.059829059829	50	NM_016491	GCGGCAACATGGCGGGGTCCAGGTGGAGGTCTTGAGGCTATCAGATCGGT
9169	SCAF11	3525	233.451631205674	233	NM_004719	GGCTTAAGCCGCGCGGAGCAGCGCAACCTGGGTCGCTCCCTGCTTCGCCGCCGCCTCCGGACCGAGCCAGCGGAGTCAGTGTCCTAGAGACCCTGTAACACCACAAAGCGGACGAAGGAGTCCATGTTGGGGAACTTGGCAGCGGAGTGACTGGGACCTGGGAACCTACTGTGGGGCCGCGGCCGGACCGAGCGCCTCGACCTCGGTCTGAGGAAACCCTTTTCCAAAGAGAA
10487	CAP1	2886	65.235966735967	54	NM_006367	GGAGAGCGGCTGATCGCAGTCCGGAGGTGAGGCGGAACTCTGAGGTGGTCCATT
252839	TMEM9	551;451	341.880217785844;168.953436807095	383;169	NM_001288567;NM_001288566	AGGAGAGGGCGGGGACAACTGGGTCTTTTGCGGCTGCAGCGGGCTTGTAGGTTCGTGGACGCGGCATTGGGGGAGGGGACGGGGGTCGCGGGGCTATTGGGGGTCCCAGTCCGGCTTAAGACCTCTGGGCGTGGTGGGCACCGGCCTTCGCCGTCGGAGCAGGGGTCCCAGACTCGCACCCAAAAGTTCCCGTCGGGCCCGAGCGGGGAGGAGCTGCGGGGCGGGCAGAGGCGGAGATGGCGGAGGGCGGTGGGACGTGATGCGCGGGTCAGAGCCGGGCCTTGAGAAGGAACTGGAGGCCCCTGGCAGCGGTGTCCCCTCGAGGACCCCTCTGCCGGGCTCACCAGGTGTCCGGCTTTGCTGGCCCAGCAAGCCTGATAAGC;AGGAGAGGGCGGGGA…
347862	PDDC1	146	20.041095890411	14	NM_182612	GCCGAGCCCGAGCC
10483	SEC23B	2580;4140	204.290310077519;380.966183574879	47;361	NM_006363;NM_001172745	GTTGCAGCTGTGGGTGAGGACGGCTCTAGCTAGTTCCCTTTTAGACT;GGGTGAGGACGGCTCTAGCTAGGTGAGCGGCTCCGGCCAGGTGAGCGGGGCGCATAGGTGACGGAGGGCCGAGGGCACGGGTATGAGTTTCTGCCGGGGGCGAGGTGAGCGGCTTCTGGGAGGAGGCCTTTTCTTGACAGTTTAGGGTAGCGGGGGAATGGATGATCCGGGAGTCCCCTGCGGATGTCGTCCCGCACCAGGCCGGGACCGATTTCTGGCTCCAGTTTCCCCAGAATTGCGGAGTGCGCACACCTGGAAGGACCCAAGTCCCGTTTTATAGTTGAGAAACTCAAGACTCAGACAAGTGAAACGACTTTTGCTTCATGACAGCTGGAACTGGAACCCAGTTCC…
84321	THOC3	175	55.451428571429	55	NM_032361	GACTGCGCCGTGGAGGCTGCTGCAGTGTTGTGAGTTGGAAGCTGGGGAGCTCGGC
4869	NPM1	68303	95.958230238789	97	NM_199185	TCCCTGGTGTGATTCCGTCCTGCGCGGTTGTTCTCTGGAGCAGCGTTCTTTTATCTCCGTCCGCCTTCTCTCCTACCTAAGTGCGTGCCGCCACCCG
5378	PMS1	1365	212.794871794872	120	NM_000534	GGGTGCGGGTGCGGGTGCGGGGTTGGGCCTGCGCATCGGGTGAGACGCTGGCTGCTTGCGGCTAGTGGATGGTAATTGCCTGCCTCGCGCTAGCAGGAAGCTGCTCTGTTAAAAGCGAAA
84545	MRPL43	2392	75.9795150501672	70	NM_176794	GGAAGCCTCGAGGTTTAGTCCCGCCCCCCTCTCCTCGCTGCTTAGGCTCCGCGGCCTCCAAGCTGTAGCT
5663	PSEN1	5181	262.803898861224	268	NM_007318	GAGGGTTCTCGGGCGGGGCCTGGGACAGGCAGCTCCGGGGTCCGCGGTTTCACATCGGAAACAAAACAGCGGCTGGTCTGGAAGGAACCTGAGCTACGAGCCGCGGCGGCAGCGGGGCGGCGGGGAAGCGTATACCTAATCTGGGAGCCTGCAAGTGACAACAGCCTTTGCGGTCCTTAGACAGCTTGGCCTGGAGGAGAACACATGAAAGAAAGAACCTCAAGAGGCTTTGTTTTCTGTGAAACAGTATTTCTATACAGTTGCTCCA
8187	ZNF239	108;108;108	292;333;169	292;333;169	NM_001099284;NM_001099282;NM_001099283	GTATTTCGGGGCCCTAGGCGCGCGAGCGGTCAGCATCCGGAATCTGGCCCCTGCAGGCGTGGGGTTCCACGTGGGAGGAACCAGTTACATTCAAGGATGCCTCTGTGGCCTTCACCGAGGAGGAGTGAGGTCACCTGGACTCTGCTCCCAGGAAGCTGTGCGGAGCTGTGATGCTGGGCAACTACAGAAACTTGGTCTTGGAGACTTGAATGAAAATTCTGTGGAGAATCTTCAGCAGAAAACACTTCAGGATCTGTTACATGAGCTTTCCTCCTGGCTAGTTTTGGAAGGC;GTATTTCGGGGCCCTAGGCGCGCGAGCGGTCAGCATCCGGAATCTGGCCCCTGCAGGCGTGGGGTTCCACGTGGGAGGAATCCATCCCCTCTGGGAGTAAGAAATG…
3140	MR1	1193	15.61357921207	15	NM_001531	GGAAAGAGAAGGACT
5208	PFKFB2	53	134.849056603774	136	NM_001018053	ACATGATTTGCCGGCGACTGTAGCGCCGGTCCCGGCCACAAGCTGTCGGCTCGGTTCGGTCGCGTTACAGGGCAGGCGCCGGGGCCAAGGCAGGGAGGGATCTTAGGAGAGATCGTAGGACATCTGAAGAGCTGCC
27339	PRPF19	1462	180.600547195622	172	NM_014502	GCGGCTGTCCCCATTCCCACGTGAAGCGCTACGCTAGCATCGCTCGGCTGGCGGCTCCCAGCTCGCCGCGGAGCAGTCCCGGCAGCAGCGGGGGACCGGAAGTGGCTCGCGGAGGCTCAGAAGCTAGTCCCGGAGCCCGGCGTGTGGCGCCTCGGAGCACGGTGACGGCGCC
5982	RFC2	2024;1921	221.444664031621;21.120249869859	233;31	NM_001278792;NM_002914	GCCTCGGGTGGCGGGAAGAGGAGGCGCGAGAATGGAGGTGGAGGCCGTCTGTGGTGGCGCGGGCGAGGTGGAGGCCCAGGACTCTGACCCTGCCCCTGCCTTCAGCAAGGCCCCCGGCAGCGCCGGCCACTACGAACTGCCGTGGGTTGAAAAATATAGGCCAGTAAAGCTGAATGAAATTGTCGGGAATGAAGACACCGTGAGCAGGCTAGAGGTCTTTGCAAGGGAAGGAA;GCCTCGGGTGGCGGGAAGAGGAGGCGCGAGA
29086	BABAM1	711;1789;1789	84.368495077356;136.147568474008;98.147568474008	87;139;101	NM_001288756;NM_001033549;NM_014173	GTACAACTTCCGGCTGTAAAGATGGCGGCTTCCTAGTGAGTCGGCGGCTGATTTAGAAGGAGGTTCAGGCTACGCCACACAGGAGCC;GCCGTACAACTTCCGGCTGTAAAGATGGCGGCTTCCTAGTGAGTCGGCGGCTGATTTAGAAGGAGGTTCAGGCTACGGTGAGCCGAAGGGGAGGATTCTGGCTTCCCCTGTCCGTGTTCCATCTAGCCACACAGGAGCC;GCCGTACAACTTCCGGCTGTAAAGATGGCGGCTTCCTAGTGAGTCGGCGGCTGATTTAGAAGGAGGTTCAGGCTACGGTGAGCCGAAGCCACACAGGAGCC
26229	B3GAT3	712	15.560393258427	18	NM_012200	GCGGGCGGCGGCGCGGCC
646851	FAM227A	222	657.283783783784	671	NM_001013647	TCTGTAGCCCAGAGTTACCTTGACCCACCCGCCTCCTGCCGCCTGCCCGCCACGCGCATGCGCTGCCCCGCCCGGCCTCTACCACCGAGGAAAGGGGTAACCGGCGCGGGGGTTCCCAGCGCCAGCCTGCGCCAATCCCCAGAAACTCCGTGAATCACCTCGGGATAGCAAACGGATTATACAAAGGCAGTGTCTTCTGGGGTCCTTTTCATGCCTCTAGGACCAGGACCTGCATTCACCCTCTCCACTGACACATTGGTCTGGGCCCCCGGCCCGGCTGTCACCATAGAAACGGCATCTCGCGGACAACGCGGCGGCTCACGAAGGTTCCATTGTTATGCTAAACGGGAAAGTGGAGACCGCGCCGGCGTTGCCTAGAGAACGCCTGGACTCAGAGTA…
23008	KLHDC10	221	105.837104072398	110	NM_014997	GCCCCCTTCCCCTGTCTCCTGGGTCTCTGGAGGAGCCCAGGAAGGAGGCTCCGCTGGTTCCGCTGGGTCAGGCGCTGACGGGACCGGGCTGCGGCAATCGTTAGCGGGTC
8706	B3GALNT1	98;123;123	714.571428571429;390.439024390244;295.439024390244	711;388;293	NM_001038628;NM_003781;NM_033168	GGGGAGGCTGCGTGTGTGCGCAGGGAGAGAACGCCGGCCACCTTCCCGCTTCCGAGCTGGGTGCGCGCCGAGCACAGGAGGGTGCAATACCTGCCTTGCGTCGCCCGTGCCGCTCCAGCCACCGTCAAATCCGGGTAGCGACCCGGGGCGTTTGCAGCGGTGCCGAGGAAGAGGACGGGAACGGTGTTACGATTGCCTGCGTTTAGGAGGTGGCTGCGTTGTGGGAAAAGCTATCAAGGAAGAAATTGCCAAACCATGTCTTTTTTTCTGTTTTCAGAGTAGTTCACAACAGATCTGAGTGTTTTAATTAAGCATGGAATACAGAAAACAACAAAAAACTTAAGCTTTAATTTCATCTGGAATTCCACAGAGACAAGGCCACTTTATGTTTCCCAGGCT…
8569	MKNK1	130	196.784615384615	213	NM_003684	ACCGCCTCTTCCGCGTTCTCGGAGGAGCGATCTGCAGGTAGGGGTGCGCGCGACCGCTCCCCGGCGGGAGCCAGCGAAGGTTTCCATGTCAGAGGCCGATGGAGAACTGAAGATTGCCACCTACGCACAAAGGCCATTGAGACACTTCGTGTAGCTGGAAGACACCAACTTCCTGACAGGAGCTTTATTTCATTTGGGATTTCAAGTTTACAG
54872	PIGG	630	53.655555555556	39	NM_001289052	AGGTGGGGTCGGTTCCGCATCCAGCCTAGCGTGTCCACG
9993	DGCR2	324	200.932098765432	213	NM_001184781	GGCCGCCATCTTGCGCGCAGCTGGAGTCGGTGCCTGAGGTTGCAGCCGAGAGTGTGCGCCAGCCCGCGGCCCAGCCGAAGCTCTTTCCCGCCGCCTCTCCGCGCCTCGCCCAGGTTCAGCTCCGCCTGACCCTCCGCTTGGCACGGTCCCCTGACCCTCAGTCCGGCCTGGTCCGGCCTTCCAGCCGCCCCGGGGACGATGAACGGAGGATAA
1760	DMPK	267	118.970037453184	119	NM_001288764	AGAGAGGCCCAGGGGACAGCCAGGGACAGGCAGACATGCAGCCAGGGCTCCAGGGCCTGGACAGGGGCTGCCAGGCCCTGTGACAGGAGGACCCCGAGCCCCCGGCCCGGGGAGGGGCC
64601	VPS16	82	52.756097560976	30	NM_080413	GGTGCTTCCCAGCTGCCGTCTGCACCAGCC
267002	PGBD2	566	136.770318021201	135	NM_170725	GCCCGACGCCAACGCAGGCGCAGCGCTCCGATTCGGCGCGGCTCATGGTCCGGTTCGGGCTCGCGAGTCTCCGTCTGGGGTAGGGCAGGTTCTTAGACTCTGTGAGTAAAGACAGCTTCATCTTCCCAGTTCATC
6672	SP100	228	94.438596491228	92	NM_001206701	GGGGCCTGGGCAGCCACACTGCACGCAGGCTGGGCCGACTGAGGGGCTCAGAGGCCAGGCTCTGAGGCCCACGCAGGGCCTAGGGTGGGAAG
51200	CPA4	487	18	18	NM_001163446	GACTGACTCCCCGGGGAC
8226	HDHD1	1598	27.459324155194	23	NM_001135565	ACCCAGACCCAGAAGGCGCCACC
1488	CTBP2	1038	400.250481695568	390	NM_001083914	TCCTGCGCAGCCAGCGGGTACCGGGAGCTGCGGCCAGCGCCGCTTCTTTCCTTTCCTTTTCTCTCCGTTTTCCTTCTCCTTCCCCGGAGGAGAAAACAAATAAAGAAGAGCAAATAGCCGGGAGGCGCTCGGCATCCAGGACGTTCCCTCCCCCGATCCAAGTTGGAATTAGCATCCTCTCGGGGGGTTTCATCACCTTAAATGGTTTTGAACCAATGAAGGTGTATTCCCTTAAAAAGACGGACAGCCCATCGTGTGAACTATAGAGTTTGTGGACAGATTTATATTGGGTTCATAGTGGCGTCATGCACGCAGACTCCTGCAAGTTCCCCTAAGTTCTTAGAGGACTGCTTTGCCTTTTGATCTGAGAGTTGCAAAGTTCCATAAAGA
5013	OTX1	71	260.901408450704	259	NM_014562	AGTAGAAAGGTGATCAATCTTCATCAGGCTACATTTCCAATCACCTAAACAACCGAGCAAGACAAGCCACTCCGACAAGGTTGGCTGCCCGGCGGGTCTCTGTGAGAGATCCAGGTAGATGGTGAACGGCCCCGGCAGCTGAGGGCAGGCCAGGCCCCCAGACGCATCAGACCCTGAAGGACTGCGTGGTGGGAGCCCTGCACCGCTCCTGGCCCCGGGCCCCCTGGATCCGTCGGGGCGCCTCCACCCAGCTGTTAGC
63894	VIPAS39	449;475	362.630289532294;264.978947368421	366;272	NM_022067;NM_001193317	CCCCTTCTCTAAGCTGCACAGCCTGAATAGAAGGGCTGGTCCAGCGGCGGCGGAGGCTGGCGCTGTCCTGAGAGGGAGGGCTCTGTGCGGAAGAGTCAGGGCGACCCTTGGGCGCTGGAGTACGCTTGGGACTGGGGCTGCGAGTGAGCACCAGCGATTGGTTCGGAAGCGGACATTTGGTTCAGAACGAGCATTTAACTCTGCCAGGGATCCGCTGGGCTCTGACGACTGCGGTAGATCCATGGCTTCCTGGACGTTCACCCGTAGAGTCATCCTAGCTTAACTCTTGTTCCCTGGTCTCAGTTCACAAGCCTCACCTGTATCTTCCTGGCTCGGAAGATAATTGAAACCAAGTCTGACTTCTCA;CCCCTTCTCTAAGCTGCACAGCCTGAATAGAA…
81557	MAGED4B	1493	121.906898861353	127	NM_030801	GGGGTGGTCCGGGCTGCTGTGCTGGCAGCAGTAGGCGAGGGCGCGGCTGCGGGGTTCCTGGTGCTGAGGACGGACGCCATTGGAGTTCCCGAGAAGGCTGAGCTCTCATCTCCCTGGGACCCGCAGC
9124	PDLIM1	169	44.059171597633	32	NM_020992	CCCCGCGGGTCGTCGCCCGCCACAGCCGCGCC
6134	RPL10	21078	43.909479077711	41	NM_006013	CTCTTTCCCTTCGGTGTGCCACTGAAGATCCTGGTGTCGCC
113251	LARP4	1493	119.213663764233	113	NM_001170803	GCCGGGTGGAGGGGCAAGGCGAGTGTGTGTCCTTATCCTAGCAATTGGGGCGCGGGCCTGTGAGCCAGTTGGAGTTGCGGCGGCGGGAACGATTGGGCTGAGCAGAGGACGAC
4257	MGST1	317;1304;1304	185.233438485804;88.2346625766871;88.2346625766871	195;81;81	NM_145791;NM_001267598;NM_001260512	GGAGAAGGGGACCGCATGCAAAGGGTGGCAGGCAGGGAGGGCCAGGGTGGGTGGCAGATGGAAGACTTGGGGGGGTCTCTGCCAGCTGGAAGTGCTTGGCTCCACTTAGCAGCTAAACTTAGCTTTTCAATCGATCGCTTTTGAAAGGGAATTGTATTTCTGTCCCCGTGCGGATTCCAGACCAAAATTGAAAAA;GCATTGCGCGCGACCCGGCGGCGGGACAGGCTTGCTGCTTCCTCCTCCTCGGCCTCACCATTCCAGACCAAAATTGAAAAA;GCATTGCGCGCGACCCGGCGGCGGGACAGGCTTGCTGCTTCCTCCTCCTCGGCCTCACCATTCCAGACCAAAATTGAAAAA
7922	SLC39A7	2853	346.51945320715	350	NM_006979	GCCACGTCCAAGCAAACCGGGAAAGGAGAGGATCCCGGAGCCGGTGAGAATTCTCTGTTTTTTCTCTACCATCCTTTCCAGGCCTTTTCCTCACCTAATGAGTCGTAGAGACGAGGGCCCAGAGAGTCTGTAAAGTGGCTGGTGAAAGATTAGTGTCCCAGGGCCCTACATCCGGGAGGTGGTTCGGGATAAAGAGAACTAGTCTTGGGAACAATGTAGGTGGGAACTTAAGGGAATGGGAGAGCGGCCCATAGAGGTGGACGGAGGGCGCGATTGGAGTAAAGCGGACCCTGTGTAGGTATAGAGTTGAGTCAAGTGGAGTCACTGCCTCTGTCCCTCTGGTCAGCGTG
10237	SLC35B1	2309	260.56864443482	263	NM_001278784	GATGTCCGGCTGGAGCTGTCGCCTCCGCCGCCGCTGCTGCCGGTGCCGGTTGTGAGCGGGTCTCCAGTCGGCTCCTCTGGGCGTCTCATGGCCTCTAGCAGCTCCCTGGTGCCCGACCGGCTGCGCCTGCCGCTCTGCTTCCTGGGTGTCTTTGTCTGCTATTTTTACTATGGGATCCTGCAGGAAAAGATAACAAGAGGAAAGTATGGGGAAGGAGCCAAGCAGGAGACGTTCACCTTTGCCTTAACTTTGGTCTTCATTCA
8402	SLC25A11	1717;1717	82.229470005824;82.229470005824	24;24	NM_003562;NM_001165418	GGAGCCGAGGGCCATTGAGTGGCG;GGAGCCGAGGGCCATTGAGTGGCG
147965	FAM98C	86	17	17	NM_174905	GCCGAGACCACACTTTC
7260	TSSC1	809	144.825710754017	145	NM_003310	GGCCAGAAAGACTTCCAGTTTGGAGTCGTTTGCTGCGGGGAGGGAATGAATGGGCGCTGGGAACACGCCCGCGAGGTGGGGACGCGCCGGCCGTAGCGAGGTCCTTAGCGTGTGAGTGGCCGGGGTCGGGTCGCTTCCCCGCAGC
26275	HIBCH	586	81.878839590444	82	NM_014362	GGCGGTGGGCGGGGCTCACGCGAGGCGCTGGAACGGTCCGGGAGATTCTCGCTCTGCTGCTTTAGCTTCGGAGTGTTTGGCG
10434	LYPLA1	2814	40.736673773987	15	NM_001279357	GAGCTGAGGCGGTGT
5917	RARS	151	36.9602649006623	42	NM_002887	TTCCGCTTCCGTCCACTTGGCGAGTGAGACGCTGATGGGAGG
285521	COX18	81	448.814814814815	264	NM_001297733	GGGTTGCGGAGGAAGTACTGCTCGGCGTGCACGCCGCCACGGGCCTGCCCTGGTGGGGCAGCATTCTGCTCTCCACCGTGGCCTTACGGGGTGCTGTCACGCTGCCTTTGGCAGCCTACCAGCACTACATCCTGGCCAAGCTAGGTGGAAAATTTGCAGCCAGAAATAAAAACTATTGCCAGGCATCTTAACCAAGAAGTTGCAGTTCGTGCAAATCAGTTGGGGTGGTCCAAAAGAGATGCCAGGCTCACTTATCTAAAGAAT
22858	ICK	85	313.611764705882	308	NM_014920	GTCCCTGTACGGAGCCCTCGGCCGGTCCTAGCAGGGATTGTCCCCATTTCCAGCTCCGGAGCGGGCGGCTGCGCCCCGCTCGTCGAGGAGCTGCGCTCACCTCAGGGGCGGGCCCCCGCCTGCGTTCGCGGCGCCAGCAGAAGACTGATTTTTGGAAATATGTATTTGGGAGACAGTCACGTCCTATTGAATACCTTGTGCTGGTGCTGCCATCGAAAAATCTGGTTACACTCTGGGGAGGACTGCTACCACTGCAGAACTGAACCACTTCGGCCGTGAGATGAGTGTCCGGCCTGAGCAGGCACACC
161582	DYX1C1	214	44.079439252336	42	NM_130810	AAGAAGCAACCAGCCGCGCTATCCGCTCCCGTTGCTACCGGA
57187	THOC2	268	17.6977611940299	25	NM_001081550	GGCTTCTGCTACTAGTGAGAGGAAG
8567	MADD	2516;1609;2516;2516;2516;2516	168.337440381558;172.747669359851;168.337440381558;168.337440381558;168.337440381558;168.337440381558	165;174;165;165;165;165	NM_001135944;NM_001135943;NM_003682;NM_130472;NM_130471;NM_130473	CCCGCTGCCCAGGATTGGTAGGCTCCACCGCTCGGCAGCCGGCTTCCCTGCTCGGACGCCGAGCACCGCCAAAGCGCACTTCGATTTTCAGAATTCCTCCTGGGAATGCTGACTCCTTGCTTGGTGCCCTGATGCTTCTCTGAGATAAACTGATGAATTGGAACC;GGAGCGGCGCCGCGCTGGGGAGCGACTGACGCCCCGCTGCCGGGGGACGTCGGGCTGGGCCTGGCCAGTCCCCCAGAGCTTGGGAGACTTCGATTTTCAGAATTCCTCCTGGGAATGCTGACTCCTTGCTTGGTGCCCTGATGCTTCTCTGAGATAAACTGATGAATTGGAACC;CCCGCTGCCCAGGATTGGTAGGCTCCACCGCTCGGCAGCCGGCTTCCCTGCTCGGACG…
4726	NDUFS6	4371	17.7025852207733	23	NM_004553	GGGTCAAAGGCCAGCGGCGCAAA
891	CCNB1	19345	115.2692168519	113	NM_031966	GGCGTGCTGCGGCGGAACGGCTGTTGGTTTCTGCTGGGTGTAGGTCCTTGGCTGGTCGGGCCTCCGGTGTTCTGCTTCTCCCCGCTGAGCTGCTGCCTGGTGAAGAGGAAGCC
805	CALM2	2388	62.242462311558	43	NM_001743	GTGGTTGTGTGGTCGCGTCTCGGAAACCGGTAGCGCTTGCAGC
89781	HPS4	198	601.878787878788	610	NM_022081	GGGGCGGCGCGTGACCTAAGGCCTCTCTGCCGCGCGCGCAGGTACGGGGCAGAAGTCGCAGGTACCCAGCTGCTGCCCACATTTCTGGTCCAGAGTCCCGAACCCCGAGCACTGGGATGCCTGGCTACTCCGAGCCAAGGCACTGATGTTTGAACTGGAAACTTCAAAACGTTTAATAAGAGTCTTCAGGATGGGTTTGAACTAGACAAGCTAGAAATTTCTTTAGAACACCAGCTCTAGCATGCATCTCCCACTTTTGGCTTTCCTGGAGAGGAGCTTGAAGAGGTGGTTCTGCAGACAGCCACAGTGATACTTAGGAAACCAGAGGAATGGATTTGACTTTTCTGCTAGGATTCTCTGTTATAGTTTCTCCCTGAGTTGTAAGAGGCATGGAAATAT…
283237	TTC9C	2012	355.733598409543	356	NM_173810	CAGGCGTTCTCACGCCCGCAACAATTCCTGAGTAGGGCCTTGCTTGAGTTCTTCGGAAAGTCTCATCCACCCCCACATCGCCTCTTTAGGAAGTCACTTAATGTTGGGCTTCATTATTCCCACATCCCTTTCCTTACTACTTGCCTGCACTTCTTGAGAAAAAGACTGCAGAAAGGAGAGGTGGGGCTTTCAGTAGAAACAAGCAAACCGCAGGTCCCTGTGGGGGGACTCTCCAGGAAGAAGGGTAATTTCCTGCCTCCTTAAATTGGCTGCTACTGTCAGTTATTTTGCTCCCAACCCCAGAGCTTCACTTGCTCCTTCACTTCCCAGTTCCGCAAGAACCGTGGGCGACAGTT
4087	SMAD2	93;144	110.430107526882;105.25	101;108	NM_005901;NM_001003652	CCCGGACCCCCCGGATCTGACGGGGCGGGACCTGGCGCCACCTTGCAGGTTCGATACAAGAGGCTGTTTTCCTAGCGTGGCTTGCTGCCTTTGGTAAGAAC;GGCCGCGGCGGCGGAGAAGCAGCTCGCCAGCCAGCAGCCCGCCAGCCGCCGGGAGGTTCGATACAAGAGGCTGTTTTCCTAGCGTGGCTTGCTGCCTTTGGTAAGAAC
4154	MBNL1	560;560	66.935714285714;66.935714285714	67;67	NM_207293;NM_207295	GCTCTTTTTTGGGGGGGTTGGGTTTGTTGGTTTCACTGAAACATTTAACTACCTGTAAAATCTAAAC;GCTCTTTTTTGGGGGGGTTGGGTTTGTTGGTTTCACTGAAACATTTAACTACCTGTAAAATCTAAAC
85025	TMEM60	474	232.006329113924	236	NM_032936	GAGGTAGAACTGAGAGATCCTCTACCGCAGTCGTTTGAGGAGGCGGAACTGAAGTTTTTTCTTAATTATCATGTGACGGGTTCTGGATTTAATGGGGGGAAAAGGGCGGAAAAGGACAAGGATCCAAACTGGCGAATTTGCTGATCTTCGCGTCCCTCTCCGCTTTCCGGCCGGCAGCGCTGCCAGGGTATATTTCCTTTTTTCCGATCCTGCAACAGCCTCTTTAAACTGTTTAA
92806	CENPBD1	921	576.052117263844	550	NM_145039	GAGGGTTTGATCGCCAGCGCAGCCTCGCCCTGCCCAGACAGCTGGGCCCTAAGGGGATAGCCAGCGCCTTTAGACTTATCTTAAATCGGGCATCGGCATCAACACTTATTTCTGGGGTCCTCCATGGAAAGCAGCTCCCGAAACAACACCCGCCCGGTCCGCCCTCCGCTGCACTGGAAAACCGCCCCTGGACGTTTCTGCCGCAGTGTCCCCCTCACGGAGTTCCGTTTGTCTGCTTGGTCGGTTGTTCTCTGGAGCCCCAGGACCCAGGCCGCTTGTATGTGCCTGCGGCCGCACGGCCCCAACACGCGGACTTCGAGCGGTACCGGGAGACCCGCGCGGCCTCCTCGGAGTGGACAGTGAAGCAGCAGCTGGGCTAGGCAGTGGGGCTGGGCCTGC…
23287	AGTPBP1	119	156	156	NM_015239	GCCTGCCACCGGGGTTTGTATGAAAACACCGGGCGGCGGGCGGCGAGGGATCCGCCGTGATCCAGGTGCTGAGCCGGGTGCTGCGGCTCTGCGCGGTCCCCGCCAGCGCCCCATCCTGAGCCGATTATCTGCAATTATGAAATGAAGTAACTCAAG
1452	CSNK1A1	67	326.761194029851	477	NM_001271741	TTCCCAGAGTGCTCTGCGCCGTGAAGAAGCGGCTCCCGGGGACTGGGGGCATTTTGTGTTGGCTGGAGCTGGAGTAACAAGATGGCGTCGTCCGCGGAGTGACAGGGGTCCCTCTGGGCCGGAGCCGGCGGCAGTGGTGGCAGCGGTATCGCCGCCCTAGCTCACCGCGCCCCTTTTCCAGCCCGCGACGTCGCCGCGCAAGCGAGGCAGCGGCGGCCGCCGAGAAACAAGTGGCCCAGCCTGGTAACCGCCGAGAAGCCCTTCACAAACTGCGGCCTGGCAAAAAGAAACCTGACTGAGCGGCGGTGATCAGGTTCCCCTCTGCTGATTCTGGGCCCCGAACCCCGGTAAAGGCCTCCGTGTTCCGTTTCCTGCCGCCCTCCTCCGTAGCCTTGCCTA…
6233	RPS27A	4902	117.936964504284	110	NM_001177413	GTCTGCACTTCGGCTGCTCTCGGGTTAGCACCCTATGGTGCCTTCTCTTGTGATCCCTGACCTAACCTGTCTCTTCCTTTTCCTCAACCTCAGGTGGAGCCGCCACCAAA
51075	TMX2	2896	31.66885359116	37	NM_015959	ACGACGCCGGCGAGCAGTGGCCGTTACGGCCGAAAAG
79102	RNF26	7470	570.83828647925	596	NM_032015	ACACAAGATGGCGGCGCCCAGCGGAGTAGGGGCTGCGCTTGGGGTTTGCTGAAGCTGGCTGCCTCTCCCACTCCCCTTTTGGGTGCAAAGCGCCGCTAGCGGGAAGACGGGGGCCGGGCGGGGACAGGGGCACCTGCGTAGCTGGACTGAGAGCCTGCGCCCAGCTTACATCGACCCCACCCGGCCCCGGCCCGACCCGACGCGACCCGATCCGATCCGATCCCATTCCATCCGTTCCTCGTCTCCTCCCGGTCTGACCCGTTGCCCGGCCGTGGTTCGCCACACCAGGCATCCAAAGCTGAGGTCGCTCCTACGGCCTGGGCTCGCCTTCGCTTTAGAGATGTTTGGCCTCTTCCCTCCCAAACAGCCCATCTTCAAAACCTGGACTCTTGGACTGGC…
8732	RNGTT	220	177.781818181818	192	NM_001286426	GGAGCTGTGGAGTTGATCCTGAATGAAAGTGGCGCGCCGCCCCTGACGTTACCCGGATCGGAGAGGTTGGAATTCAGATTACGGCTGCGATTCGGGTGTCTCGGACCCCGGTGTGCACCGGACCACGGGGAGGCGGCTCCAAAGGCGCGGTGAACGTTGGTGAGGGAGGGCAGCTCTGCGCAGCCCCAAGAC
8667	EIF3H	4439	19.3773372381167	26	NM_003756	CTCTTTCTTCCTGTCTGCTTGGAAAG
2952	GSTT1	1356	45.57005899705	40	NM_001293813	GACTCCCTCTGGTTTCCGGTCAGGTCGGTCGGTCCCCACT
26273	FBXO3	124	17.4838709677419	15	NM_012175	ACCGGGCCAGGCAAG
55471	NDUFAF7	769	83.0468140442133	33	NM_144736	CCTGGCGGAGCGAGCTAGCCTGCGAATTTCAGC
7297	TYK2	543	346.324125230203	371	NM_003331	AGCTACCCGCGGGAGCGGGGAGGGGTCCGGGTTCGAGCTTGTGTTCCCCCGGAAGGGTGAGTCTGGACGCGGGCGCGGAAGGAGCGCGGCCGGAGGTCCTCAGGAAGAAGCCGCGGGGACTGGCTGCGCTTGACAGGCTGCACTTGGATGGGAGCACCTGGTGCCTCGGGACTGCTCCGATGCCCGGGTCTGTGCTGAATGTGTAATATGCGGAACTATATTGAAACATTACAACCATCTTTTGATGGCAACACCCTGAGGACCTCCCTTTTCCAGATGGGGAAACTGAGGCCCAGAATTGCTAAGTGGCTTGCTTGAGTTGACACAGGGAGCTCCAGGACTCACCCTCAGCTGAGCCACCTGCCGGGAGC
57157	PHTF2	239	163.899581589958	167	NM_001127360	AACCCTCTGGAGGCAGCGCGCCCGCGGGCAGCCTCGTTGTGGCTCCTTGGGCTCTGTTGGCGGCGGCGCTAGCTTCGGAGTCTCCCGCGCGCACCTCAGCCGCCTCCTAGCGGCGCGGCGCTCGCTCCTACGCCTAAAATGACCAATGTGTGATTTCAGTGGAATAA
51626	DYNC2LI1	483	82.7515527950311	75	NM_001193464	GCGGAGCTCGCCGCCTGATTCTAGGCTGGTCACTACTCCGAGCCTGTGACGTTTGCGGCAGCCAGGCCGTCGACG
11016	ATF7	4388	107.685733819508	104	NM_001130060	TCCGCCAAGGGGGGAAAGGAGGAGCTGGAGACAGATTGTAGGACCGAGCGCGGGCAGGCGGGAGGCAACGGAGCTACCAGCCGCTCCTCTCTGCTATATGAAAT
91012	CERS5	6873	133.211843445366	117	NM_001281731	CTGCCTCAGCCTCCCAAAGTGCTGGGATTACAGGCGTGAGCCACCACGCCCGGCTTTTTTATTCTTTTTAAAAATTTAAATCCTTGGGACTCTGCTTGATATAACCTCTTCTTTTAG
283431	GAS2L3	618	258.258899676375	260	NM_174942	GAGGCCCAGGCGGCGGCGGCAGCGGCGGCGGTTGGTCAGGGGCGTGTTGGCCCCGCACAGATTGAGCCGAGTTGTCGCCCCGCTGGGAGAAGTGACCCTCCTGCGCCTGATCAGAACACTGAGGCTCAGAGAAGTTAACTACTCCAAAGTCATATAGCCAGTATTTTCTGGAGCTGTAATTCAAATCAGATGTGTTCAATACCTTCTACTACCCCATTGCTGTCTTTATGAAAAGAAATTTCATTTCAATATAGGTGACT
25807	RHBDD3	199	347.713567839196	399	NM_012265	GGGGGAAGGGACCCGGACTAGAACAACTGCTGACTAATCCGCGGGCCGCGGGGAATGGGTGGCGCGCCAGCCGGTCGGCAGGGGTCACGCGGCCGGGTGTGCGCGGAATGGATTCAGGGTTCTCGGGTCGCGCCCGGGAGCTAGAGTCCTGACTCCCAGCCGGGGTCCCCGACCGGCCTTTCGGGGTTGCCGGGCGCGCTCTGCAAAGGGGAAACTGAGGCCCAAGGAAATTGAGTATCTCTGCAAAGTCACCAGCTGAGTTCGAACCAGACAGATCCTGGGACCCCCTACTCTATCCGCCACCGGAAGAATCTCCGTCCTTGTCTTTCCATTCTGCCCTCCCGGCTTCCCAGTAAGCACACAGCCCCAGGACCACCCTTGACCGTCCTCAACCAAGCG
92106	OXNAD1	407	454.936117936118	452	NM_138381	GTATTCCAGGCGCCTGCAACTAAACGTGGCCGGGTCTGCAAGCTAGGTGCCAGCGGGGAAAGTTTCCCTGCTTCTTATCGTCTGCTTTAACGCCTTAAATAGCCCGCTGAAGGCTGCAGCAGGTGCTAGGTAGCAGCCTCCCGGCCCTCGGGAAAGGCGGGGTGGGGAGGCGAGAGCAGCTTAGCCTCCTCGACCTCCCTTCCTGGTGACGGACGAACAGTTCCCGTAGAATTTCGCTTCACCGAGTGACCTTGAGCCCAGGGCGACGGTCAGCTTGTTAATTCCTGGCTGCAGGAACTTTGTGAGAATTTTAATGCATGGAAAAGCTGTCCATGTTCCAACTGCTGTACATCCAAAAGTCTCAGTGTAATAGCAGGACCAAAATATTCTGTCAATCAG…
25996	REXO2	2217	29.733423545332	11	NM_015523	GGTCCCGGGTG
4488	MSX2	181	74.9116022099447	78	NM_002449	GCAGCAAAAAAGTTTGAGTCGCCGCTGCCGGGTTGCCAGCGGAGTCGCGCGTCGGGAGCTACGTAGGGCAGAGAAGTC
374659	HDDC3	897	15.0122630992196	9	NM_001286451	ATCCGCGCG
6047	RNF4	4755	300.088748685594	312	NM_002938	GAAGCGGAAGTGGGTTGCTGTTGAGGCGGCGGCATCTTTCTCGAGGAGCTCTCCTGGGCGGCTGAAGAAGGAGCTTCTTCTCCGGAGTGCGCCGGCGGTGGCGCCTGCGGACCTAACTAGCTCCAGGTTAGGCCGAGCTTTGCGGGAAAGCAGCGGACTTGAAAATACTGGAAATCTGTCCGGATCCAAATTATTTTGCAAGCCAGATGAGTAACCAGAGGGCATGAAAGGTTGAGAACATTTGACTTCCCTGCAAACCTTGGTATAGATCACTTCCTTTTCTGTAGGAAAGGAAAGGCACCAAAGAGCACA
5500	PPP1CB	405	133.362962962963	31	NM_002709	GCTGCTGGGAAGGAGAGTCTGTGCCGACAAG
10455	ECI2	487	106.41273100616	106	NM_006117	CCCGCAGCCCTAGAGCCGCCCAAGGGATGGCGATGGCGTACTTGGCTTGGAGACTGGCGCGGCGTTCGTGTCCGAGGTCACTAGTTTCCCGGTAGTTCAGCTGCAC
4090	SMAD5	784	443.658163265306	446	NM_001001419	ATCCGGGTCCTGGGCGAGCGGGCGCCGTGCGCGTGTCCCGCGGCCGAGCTGCTAATAAAGTTGCAGCGAGGAGAAGCGCAGCGACGGCGTCGGGAGAGCGCGCCTAGCCGGCTCGCGAAAAGGAAGCTGTTGAAGTTATTGAAGTACCTGTTGCTATATTCTAAGAAATTAAAATGTCCAGAAATCTGCCTCTAAATGGGATCTCACTATGTTGCTCAGACTGGACGTGATTGAACTCCTGGGCTCAAGTGAGTCTCCCGAATAACTGGGATTACAGGACTTGACCCAATGAAAGAAGCATATGGCACTTGTGAAGATAAATGTTACTCCTCCCTTTTTAATTGGAACTTCTGCTTAGGACCTGTGTATGACGTTTCACCTGTGATCTGTTCTTTCGGT…
23461	ABCA5	2863	1153.30597275585	1124	NM_018672	GTGCTGGGATTACAGGCGTGAGCCACCGCACCCGGTCAGCTATTTTCTACATGCTTCATTTGCAGTGTAATATTGGATTGTATGAGACTTTGGGTTTTGTGTTAATACCTACAGAAAATGTTGATATTTTCTCTTAGCAGGCTGTCAACCAGGTTAGGTTCAGGTCATAAGTTTCTACCCACATTCTTTGAACTGTAGTTGTCATTTTAGTTTATTTTTCAAAAACTTTTGCAGTACCTTTTTGGTCTGTCTTGTGTGTGCCTTGCAGTGAACAGTCTGGATTTGGACAGTGGTCTGTCTGTTAGTTCAGTTTCTCAAGCCTTTGTCACACTAATAGGATTGGATTTATGTATGTCCAGCTTGGGAATTATTACAGGAATTAAAAACAACTTTTTAGAG…
91949	COG7	245	169.016326530612	171	NM_153603	GAGTGCGCTGAGCGGGGAAGCGCAAAGGGGCAAGTTACCCGTCCTGGCGTTTCTGGGGTTCGCCTCGGAGGCTAGCCTCGGTGCTCTCGCAGGCTCGCTCGCTTCTGCATCCCCGTTGCCGCCCGGAGCCAACTCTTAAGTTCTGGACGCCAGGCCTGAGGCAGTTCCGCC
6533	SLC6A6	623;623	320.00481540931;320.00481540931	337;337	NM_003043;NM_001134368	GGCCGAGCTGGTATTTTTCCACCCAGCAGGATGGGTGATGCTGAGAGCTGCCTGCTCAGACAACAGACACGCGAGGTCAGGAAGAAGCCGCTTATAAATTACCGCTTCCTTCGCGCCGCCGCCAACGCCGAGCCCCGAGGACCGCAAGCCCAGAGGACAAGCTGCGCCAAGAGGGAGTGCGGAGCGTTCACCCAGCGGGTCAGAGAGCGAGCGGGCAGGCAGCCCCCGGCCGGCGGAACCCGGCACAGCCGAGCAGAGCGCGGGCGGCGCCGCAGCCACCCCAGATCCAGAACCAGAACCACAGCCCTTCTGAGGAGCTCCCAAACAAAGCAAGGAG;GGCCGAGCTGGTATTTTTCCACCCAGCAGGATGGGTGATGCTGAGAGCTGCCTGCTCAGAC…
22937	SCAP	87	5	2	NM_012235	GG
26003	GORASP2	701	72.72182596291	52	NM_015530	GGGGGCGGGAGCAGCGCGGAGCCCGGCTCGGCCACACCGATCGCCCGCCGCC
7737	RNF113A	8085	132.063945578231	62	NM_006978	GACGTGCAGGGGCCAAGTGCAACCCAGGCAGCCACGGCTGTTTCGGAGCTCAGGACTCTAAA
11338	U2AF2	2233	385.622928795343	66	NM_007279	GAAGCGGCTGGAGCGGGCGGCAAGGCGAGGCGAAAGCTGCACAGGGCCCTACGCGGCCGCCTCAGC
55695	NSUN5	804	18.194029850746	6	NM_148956	GGGAAC
4137	MAPT	1297	150.725520431766	144	NM_016841	ACCGCCACCCACCAGCTCCGGCACCAACAGCAGCGCCGCTGCCACCGCCCACCTTCTGCCGCCGCCACCACAGCCACCTTCTCCTCCTCCGCTGTCCTCTCCCGTCCTCGCCTCTGTCGACTATCAGGTGAACTTTGAACCAGG
2177	FANCD2	1409	69.9978708303762	70	NM_033084	GGGAAAGTCGAAAACTACGGGCGGCGACGGCTTCTCGGAAGTAATTTAAGTGCACAAGACATTGGTCAAA
79036	KXD1	2662	117.465815176559	125	NM_001171949	GGTGCGTGGTGACGTTTCGCCGGCGCGGGCGCCATCCCGGAAGCGCGAGCAAGGCCGCCAGATGTGCAGGTGCCGCCGCTACCGACGCCGGGGCCGAGTTTGGGGCAGCGGAGGAGGAGAAAGAG
976	ADGRE5	1503	186.159015302728	80	NM_001025160	ACAGCTGCCTAGCCTGTGGAGACGGGACAGCCCTGTCCCACTCACTCTTTCCCCTGCCGCTCCTGCCGGCAGCTCCAACC
8438	RAD54L	1844	627.909436008677	628	NM_003579	GGGAACAGGAAGGTTGAGAGAGAGGTGCTGGGGTCTGCGTCTATCTCTGTCGCTCTTTTCAGCCCCTCCTGGTATTCCCCTCCTAACCTGGGTTTTTTACACGCCCGCGTGGCTTCCTGCTCGACCTCCCTGAGTCTGATCCTGGTTTCCACCTCCAGCCCTGGGAAATTTCCTTTCTCCAGACTCGCCCTCCCCACCCGGGCCTCGGACTTTCACCCCAGCTTCTCTCTCCTGGCCAGTGATTACCCACCCCCAATCCCACCCCGCCCCGCCGCGCAACTACCTCCTCCCTTCACCCGGACTGGGACCATCATCCCCACTCCACTCCGCCCAGTCTGGGACTCCACCTGCCTCCTCCCCAATCCCACACTAATCTCTGCTTGGTCTCTTCCTCTTTGG…
129880	BBS5	368	66.366847826087	66	NM_152384	GGAGCCAGAGAGACGCAGCTAGGCCTGCACGGCTGTGGAGAGATCCTGCCACGGGCCTTGTTCACC
56242	ZNF253	2282	121.153812445224	105	NM_021047	AGTGTTCTGTGTCCTGTGCTTATAGAGGCCCGTCCTCTGTGGCCGTGTGACCTGCAAGTATTGGGAGAGCCACAGCTAAACCCCGGGACCCCTGGAAGCCTAGAA
3918	LAMC2	73	83.260273972603	92	NM_005562	GGCACAGCGGAGCGCAGAGTGAGAACCACCAACCGAGGCGCCGGGCAGCGACCCCTGCAGCGGAGACAGAGACTGAGCGGCCCGGCCCCGCC
7284	TUFM	4758	63.044136191677	79	NM_003321	GCCTTCCAGCCGCAGGCGCCCTTCTTCTTCTGTGCGCTCGGGCTCCTGGTCCCGGCTCCCCGGTTACCGGGGCGCGAGT
11065	UBE2C	6015;6015;6015;6015;181	52.19817123857;52.19817123857;52.19817123857;52.19817123857;313.707182320442	52;52;52;52;330	NM_001281741;NM_181800;NM_181799;NM_007019;NM_181801	GCAGTTGCAGTCGTGTTCTCCGAGTTCCTGTCTCTCTGCCAACGCCGCCCGG;GCAGTTGCAGTCGTGTTCTCCGAGTTCCTGTCTCTCTGCCAACGCCGCCCGG;GCAGTTGCAGTCGTGTTCTCCGAGTTCCTGTCTCTCTGCCAACGCCGCCCGG;GCAGTTGCAGTCGTGTTCTCCGAGTTCCTGTCTCTCTGCCAACGCCGCCCGG;GACTTCCGGGACTCCCACCTCCTTGCGCGGGTGAGATTCGAGAGATGGGGGACAGGCCAGGAGCTCAGACCGCTCTTTGAGACTCTCCCGAAGGAGAATGGGAGGGTAGGGGCGCTGCCAGACTCCTTCCCTGGTGGGCCTAGATGAAGACGCTCAAGGACCCTCGTGACTTGGCCGAGACAGGGGA…
201158	TVP23C	819	131.583638583639	153	NM_145301	GGATTTGCTCCCTCAAAGCGGAGGTGAGGCCGGACTGAGGCTCTTACAGTGGTCCCTGCTGGCCCTTGGTGACGGGTCGCGTCAGTTCCGACCCGGACCCGTACGCTGCTGCGCTGACGTGGCTCCTGGAAGCAGGGCTGGCGTAGGGCCGCC
23023	TMCC1	258	195.627906976744	188	NM_001128224	GGACCGGGTGCGGCGGCCGCAGTGGAAGGAGCAGGCGCTTGAGCTCGAGCGACGGCGCTGGCGGAGACGCCGGCTGCTCCTCCCCTCCCCGCCGCTTTTCCTAAAAGGATTGTACACCTTAGAAGTGCTTAAGGAAGAGTGATGAAGCTCTGAATCGTGTCCTGCAGCAGATTCGAGTGCCACCCAAG
5534	PPP3R1	348	405.103448275862	385	NM_000945	AGCGCGAGCCGCTGCAGTGAGTCCGTCACGGCTCCGGCGCGAGCGCGAGGCTGCAGCCCCCGAGTTTCCCGGCCGTCTTCGCCCCCTCTCCCCCTCCTTTCTTCTTCTCTGCCTCTCCTGCCTCTCGCCGCTGCTCCTCCCGCGCTCTCCGGCTCTGAATCTCGACCTTAATTTATTTCCCCCTACCCTGCCCGCTCCCTCGCGTGCCCAATCGCCCGGCCGGCGCGGGCCCCGCGGCGCCGCCTCCCCTCCCCCACGCGCGCCCCCTCCCCGCCGGCGACCCGAGGGCCGCAGCTGGGCCGCCGCCGCCGTTTCCTGCGAGCCAGCCTGAGCGCAACACTTCTCCGAGCCAGCGAGCCAGCGAGCCGCCGACCCGCCGAGCAAA
118813	ZFYVE27	182	157.582417582418	163	NM_001002262	GTAGGCGGAGGAGATTTTCGGACCTGCGACTTCCGAACAACCCTGGCAGGAGGAGCGGCGTTCAGCCGGGGGAGGCCTGAAGAAACGCTCCGGGGCCCAGTGGCTCTACCCCTGCTCCTGCCCGACCCTGCCGCCTCCCTCACGGAGCCAGCGGCCGGGTAGG
284323	ZNF780A	156	235.858974358974	238	NM_001010880	GACATAGCGGGGTAAGGTCTTCACGTCTGAGGAAGAGATCTGTGGCTGCGGGAGATCTCTGCGGATTGGGGCTCCAGCCTGACTGACCCGACAGTGCGGGTGGCCTAGGGGGAGGCGCTCAGATCGTATTTTTATCCAAAAGAAGGACCTGGAGGAGGATGAGAGCGTTACTGCTGCACACCTAAAGTCAAGGGGGAGAAGCCCGAGGAAGATTGACCAGTTTTGTAATTCTAGCAAC
5990	RFX2	52	148.673076923077	159	NM_134433	GGGAGCCGGAGGAGGAGCGGCCGCCGCCGCCACCGCCGCCGCCATAGAGACTGTAGCCGTGGAGACTGTTACTTACCAACGGGGACCAACACGCAGCAGCCGCTGCCGCCGCCGCGGGAGCCGCTGCCCGAACTCCCGGCCCGAACTCCAGACCTGAGC
56931	DUS3L	2200	40.509090909091	32	NM_020175	GCCACACTCCAGAGCGGATGTGAGGGGCGCCG
4256	MGP	11860	69.858347386172	66	NM_000900	CCCGTAGGAGCCTCTCTCCCTACTGCTGCTACACAAGACCCTGAGACTGACCTGCAGGACGAAACC
2745	GLRX	79	55.063291139241	33	NM_001243658	GGATTCTTCCCGGGGAGACCGCAGCCCATCGGC
56181	MTFR1L	1545	161.85501618123	187	NM_001099625	TCCGGGGGGCGGGTCAGCGGAAGTGAGGGCGGTTGAGGCTGGGCGGCCCAAGGTGGAAGGAGGGGCCGTGAGGTGAGAGAGTCCGGGAGCCCGAGCTTGAGATGGCCTGATATGAAGGAGTCACGCCTCCCGCCTCCCGGAGCTGCCCAGTGGCTGCCTTGTCCTTCAAGTGCAGGAGCTGGTTCAA
2629	GBA	5861	301.583688790309	314	NM_001171811	GACTCCCCAGGGCTGCTTTTCTCGCGGCTGCGGGTGGTCGGGCTGCATCCTGCCTTCAGAGTCTTACTGCGCGGGGCCCCAGTCTCCAGTCCCGCCCAGGCGCCTTTGCAGGCTGCGGTGGGATTTCGTTTTGCCTCCGGTTGGGGCTGCTGTTTCTCTTCGCCGACGGTGCCCGCCCCTGCATCCCTAAAAGCTTCGGCTACAGCTCGGTGGTGTGTGTCTGCAATGCCACATACTGTGACTCCTTTGACCCCCCGACCTTTCCTGCCCTTGGTACCTTCAGCCGCTATGAGAGTACACGCAGTGGGCGACGG
100529251	CKLF-CMTM1	4241	119.385758075925	113	NM_001204099	AGGGGAGGGCGGTGCTCCGCCGCGGTGGCGGTTGCTATCGCTTCGCAGAACCTACTCAGGCAGCCAGCTGAGAAGAGTTGAGGGAAAGTGCTGCTGCTGGGTCTGCAGACGCG
134266	GRPEL2	2416	47.988410596026	21	NM_152407	CTCTCAGCCCAAATTGGAAAC
10807	SDCCAG3	1851	280.591572123177	281	NM_001039707	CAGCCGCCATCTTGCGTCTCCGCCCCGCTTCAGTCGTCACTTCCGCTTCCGCCCACGGCTTCCCCTCCCCCTCGCCGACGGCCCAAGGCGTTCAGGCACGCGCTTTCGGTGCTCGGAGCGGAAGCAGCGGCGAGAGGCTCGGAGGCGCGGGGGCGGCCGAGCGGCGGGCGACGGGGGCGGGCGACGGGGGCGGGCGACGCGGGCCGCGGCACGGGCGGAGCCGGGGCCATGGAGCCGCCGCTGCCGGGCTAGGCAGGTCGTGCCCCGCCGGGCCGGCGGCG
1121	CHM	50	23.74	25	NM_001145414	GTCACATGACACGTTTCCCGTCAAG
1998	ELF2	125	84.912	130	NM_001276459	GTGTGCGAGTGCGTGAGTGTGTGTCGGTCGCACGGCGTGTGTCTCCGGCCGCGGGTTCCGCCTCCTCCCCTGCCGCCGCTGCTCACGGTGTAAGTCAATGTGAAGCAGCAGCTCCAGCCCCGGGATAAAC
11232	POLG2	379	108.174142480211	125	NM_007215	GCCCGCAAGCACGCTCACCTCCGTTGCGCCTGCGCCGTGGCCTCTCCGGATTCTGTTAACGGTAGTGGTGGCTTGTTGGGATCCGTTGAGTGATGGGAGAGTGTGCTCTTTAACTTCGGAGAGAG
84285	EIF1AD	1227;1326;1227;1326	131.80358598207;331.892911010558;206.80358598207;326.892911010558	132;337;207;332	NM_001242486;NM_001242482;NM_001242485;NM_032325	ACGGTTTTCGGAGGGATCAGACTCAGACTCACGTCGCACTCCTCGCAGTTGGACTGGTGGGAACTGGGAACACTGGAGACCTGATTTCTAACTGACGCTACCGTCGCGGCCGCCGTGTGGGACGACTTCAGC;ACGGTTTTCGGAGGGATCAGACTCAGACTCACGTCGCACTCCTCGCAGTTGGACTGGTGGGAACTGGGAACACTGGAGACCTGATTTCTAACTGACGCTACCGTCGCGGCCGCCGGCAAGTTCCTTTACTGTGTTTTCTTGGTTCAGCCTTGAAGTGAGTCGTGGACGATCCTCTCTCAGCGTCCAGCCTAGACGGCGGTGTTGCTCCGGCAGCGTTCCTGGGAGCCGAGGGCCAGAGACTAAGTAACAGTCCTGGGTTCTGAGCC…
1514	CTSL	1625;1625	132.176;248.176	149;265	NM_145918;NM_001257973	GGCCAGAACCGCGACCTCCGCAACCTTGAGCGGCATCCGTGGAGTGCGCCTGCGCAGCTACGACCGCAGCAGGAAAGCGCCGCCGGCCAGGCCCAGCTGTGGCCGGACAGGGACTGGAAGAGAGGACGCGGTCGAGTAGGTTTTAAAAC;GGCCAGAACCGCGACCTCCGCAACCTTGAGCGGCATCCGTGGAGTGCGCCTGCGCAGCTACGACCGCAGCAGGAAAGCGCCGCCGGCCAGGCCCAGCTGTGGCCGGACAGGGACTGGAAGAGAGGACGCGGTCGAGTAGGTTTTAAAACATGAATCCTACACTCATCCTTGCTGCCTTTTGCCTGGGAATTGCCTCAGCTACTCTAACATTTGATCACAGTTTAGAGGCACAGTGGACCAAGTGGAAGG…
100130890	TSTD3	72	106.666666666667	106	NM_001195131	GGCGGCCGCCGGCCCGCAATGGTGCTACCCTGGTTGCTGCTCGAGACTGCGCGCAGGGCGGTCCTCGGGTCCGCGGAGGCTGCGCTCTGCGCCATGAAAATGACAG
54890	ALKBH5	112	685.982142857143	742	NM_017758	GTGGCGGTTCCCTGGTGAATGCGCCCTGGGGTTGAGGCGTCTGCGGGCGTTCGGACGATGCCGTGACGCGGCACGGCGACACTGTTGGCAATATGAGCGCACCCCTGTAGAGGGAGCCCTTCGGTCCTGGAGGCGGCGCGGCGTGAAGACAGGTTGCTATTTGAGAGCGTTCCCTTGAAGCCCCTCAGAGAGTGGGGGAGGGGCGGCGGACGGCAAGCGGTTCCTGTCTGCGCTTGCGCCGGCGCCTCTGCCGACCCGGCCTGCACGCACGCGCATGCCCGTAGCGCGCGGAGCCGCGGTGGCCGGCAGCACTGCGCGTGCGCGGTGAGGAGCCCGCTAAGGAGCGGCGCTGGCGGACGTCGGGCTGGCTGCCCGTGACGTCGTGCGGAGAGCTTTAAA…
222658	KCTD20	51	106.019607843137	97	NM_173562	CTCCCGGGCGGATTCCAGCCCCGAGCGGGACAGCGCGGCGGGGAGCGACGAGATTTCTCTCTGATCAAACGGACAGTTCAGGACTCAGAATCTAAGG
51132	RLIM	87	276.402298850575	275	NM_183353	GTCGCTGCTTGGTAACAATGGGGAAGATAATGGCTGCCTGAGCAACGTCTCCGAGCAGGCGCTGGGCTAGAGGCGGGTCTCAACCAGCTACTCATTGGAGGCGGGCTTGAGAGCGGCGGCCAGGGAGGTGCGGAGCAGCCTCGGCGGCGGCGGCCGAACCAACCGAGTCGGATCCTGACCCTAAAACCTAAGCAGAGTGAAGAAAACTAAAATCCAGTTTATTGTATTTCAATACTATGTCATAACAGTCAGGTATTTTCCACTTGTTCATCAAT
51377	UCHL5	447	96.447427293065	82	NM_001199261	GCTGAGATCTGTGGCCGGCGGCAGCTGGTGCGGGGGGCAGCTGAGAGCGAGAGGTGGATCGGGGCGGTGTGTGGCCAGGGCC
25923	ATL3	467	92.475374732334	131	NM_015459	CACCTTCTGGCTAGTTTTTTCTAGAGCCCAGGCTCCGCCCGTTTCCCGCTTCCAGGGCCCGGTTCGTTCCCGCCCGCACCCGTCCCTCTCCTCTGCACCCCTGCTGCTTCTGCTTTGAAGGCGGAGGCTCC
3712	IVD	446	16.769058295964	15	NM_002225	GCTGGCTCTTCGTGC
6457	SH3GL3	81	365	365	NM_001301109	TGCTGGGATTACAGGTGTGAGCCACTGTGCCCAGCCTCTTCTCTCACTATCCGTTTCTGACAAATGAAAAAAATGGATGTGGGTCCTGCAGAACCTGAGGCCAGCTCTAACCAGTCTTTCATGGATGCATACACCTGCCTGCAGGCGCTGCTCCCAGGTTATGAGGCTGGTTCTTGGGTTTGACTCTGGGAATCATGCTCATTGATCTGCTTTTCCTAATCATGTCAGTGAATACCTACACGTGAAGAAAACTCAAGCTGCACCATAAAGCTAAAGGAAGAAGGAGCTTTTAAGTGAATAAGACCATTTTCCCAATGAGCAGTGTCATAAACATTGAGGACTCTCTTAAATCAGAAGATGAATGA
8473	OGT	918	205.075163398693	217	NM_181673	GGCCGAGGAGCCGTCGCCGCCATTTCAAGACCGTACTAGGTAGATGGTCAATTAGAGTTCCCAGGGTTTGAAGCCTGTAACTGCTGCCGCCGCTCAAGCCCTCCAGAGCATTGCTACGGCTGCTGCCCTTGTACTACTACCTCCAAATACGTTCTTGCTGGTAGTGGCGGCAGCAGGACCAATTACCTCTTTTTTGCTCTCCCTCGAGAAGCTCCAG
10694	CCT8	1387;1387	237.07354001442;424.07354001442	237;424	NM_001282908;NM_001282907	TCCTCGCTTCCTCCGCGGTCTTCCGAGCGGTCGCGTGAACTGCTTCCTGCAGGCTGGCCATGGCGCTTCACGTTCCCAAGGCTCCGGGCTTTGCCCAGATGCTCAAGGAGGGAGCGAAAGTAAGGGCTGAAGGAAAGGAATGAGCACTTTTCAGGATTAGAAGAGGCTGTGTATAGAAACATACAAGCTTGCAAGGAGCTTGCCCAAACCACTCGTACAGCATATGGACCAAATGGA;TCCTCGCTTCCTCCGCGGTCTTCCGAGCGGTCGCGTGAACTGCTTCCTGCAGGCTGGCCATGGCGCTTCACGTTCCCAAGGCTCCGGGCTTTGCCCAGATGCTCAAGGAGGGAGCGAAAGTAAGGGCTGAAGGAAAGGAATGAGGTGGGAGCGTCAGCATA…
28960	DCPS	557	38.885098743268	21	NM_014026	GCACACCGCCTCCGCGGCAGC
114789	SLC25A25	62	33.677419354839	29	NM_052901	GGCAGTGGAGCACCCAGCAGGCCGCCAAC
56949	XAB2	371	20.911051212938	25	NM_020196	CTCCTGTACCTGGGCATCCAGAAAA
8754	ADAM9	321	94.6261682242991	106	NM_003816	GCGCGCTTCCCGGCCAGACTTGGGGCCCCGGCAGGGTTGGAAAATGATGGAAGAGGCGGAGGTGGAGGCGACCGAGTGCTGAGAGGAACCTGCGGAATCGGCCGAG
7323	UBE2D3	1840	405.234239130435	466	NM_181891	GGTCCAATCTCCGATCTGTTTAGTAAGAAGGTGCTGTTCCGAGAAGAAGGAAAAGGGCTTGACACGTATTCACTCGGCCCCGGACGTGGGAAGCAAGCCGTCTGGCTTCGGCCTCACATCGGTCTTGTGCTCGGGACGGCGGCGTTGGCGGACTGATCCGCGGCGGTGAAGAGGCAGGAGGAGGGGGAGGGGCGGAGCGTGGCAGCTGGCAGTAGTTCCGTCAGAGCGGACATCTTGTGGCTGTGTCGTGCGCGTGAGCCCCGTAGGGCCGGGGAGGCACCAGCTGCCGCGCGGGGAGGAGGCCGAGGCCGCAGCTTGAGGGAGGCCCCGGCCCCTCTGCGCCTGTGTCTGGCAGAGCTGGTGTGAGACGAGACAATCCTGCCCCGCCGCCGGGATAAT…
6342	SCP2	139;1296	299.884892086331;85.2554012345679	307;68	NM_001193617;NM_001007100	CACGCGCCTGTGTTGCCGCCCGCGGCCCTGGCTTCGGGCTTCAGGGAGCTCTGGTGCAGTCTCCGCCTGTCAGTGCCGGCAGTCGTCCGCGGCGCCCGCCCCGGTCCCGCACTGGTGCAGCCATGTCCTCTTCCCCGTGGGAGCCTGCGACCCTGCGCCGGGTGTTCGTGGTGGGGGTTGGCATGACCAAGGCAAGAAGGCTTTAGCTGATGCACAGATCCCTTATTCAGCAGTGGACCAGGCATGTGTTGGCTATGTTTTTGGTGACTCTACCTGTGGGCAGAGGGCTATCTATCACAGTTTGGGA;CTGGTGCAAAGGTGGCTCTGCAGCATAATTTAGGCATTGGAGGAGCTGTGGTTGTAACACTCTACAAG
9270	ITGB1BP1	127	150.015748031496	155	NM_022334	GAGGGCTGGAAAAGCCGGCGCTGGAGCGGGAACGGGAGTAGCTGCCTGGGCGCCAAAGGCCGCGGCACTCCCACGCGGACCCCGAAGTCCGCAACCCGGGGATGGGCCCGCGGCTGCGAGGGGATCTTCTCTGGATCAAGCAATGGTGGTGAAAA
6646	SOAT1	983	264.582909460834	231	NM_001252511	GGGCGCCAGGAGAGCTTCCCGGAGTCGACCTTCCTGCTGGCTGCTCTGTGACCGCTTCCCGGCTCTGCCCTCTTGGCCGAAGTGCCCGCTGCCGGGCGCGGGCCTCAGACAATACAATGGTGGGTGAAGAGAAGATGTCTCTAAGAAACCGGCTGTCAAAGTCCAGGGAAAATCCTGAGGAAGATGAAGACCAGAGAAACCCTGCAAAGGAGTCCCTAGAGACACCTAGTA
79717	PPCS	471	697.68152866242	693	NM_001287510	GATGGCGGAAATGGATCCGGTAGCCGAGTTCCCCCAGCCTCCCGGTGCTGCGCGCTGGGCTGAGGTTATGGCTCGCTTCGCGGCCAGGCTGGGCGCGCAGGGCCGGCGGGTGGTGTTGGTTACGTCAGGCGGCACCAAGGTCCCACTGGAAGCGCGGCCGGTGCGCTTCCTGGACAACTTCAGCAGCGGGCGGCGCGGTGCAACCTCGGCCGAGGCCTTCCTAGCCGCCGGCTACGGGGTCCTGTTCTTGTATCGCGCTCGCTCTGCCTTCCCCTATGCCCACCGCTTCCCACCCCAGACTTGGCTGTCCGCTCTGCGGCCTTCGGGCCCAGCCCTTTCGGGCTTGCTGAGCCTGGAGGCCGAGGAGAATGCACTTCCGGGTTTTGCTGAGGCTCTGAG…
90407	TMEM41A	855	39.022222222222	23	NM_080652	GCGGGCCGGGGTGCGGAGCCGAC
55974	SLC50A1	1650;73;1650;1650;1650;73;73	63.590303030303;226;104.590303030303;104.590303030303;63.590303030303;311;254	69;226;110;110;69;311;254	NM_018845;NM_001287592;NM_001287587;NM_001287588;NM_001122839;NM_001287590;NM_001287591	GGCTGCAGTAGGTCCCGGCAACCGCAGGCTCGCGGCGGGCGCTGGGCGCGGGATCCGACTCTAGTCGTA;GAGGAAGGCTTGGTGATTCCTGGTAATGTGTTATTTTGAGAAAAAGCTTCGGCAGCACACTCCAGAAAAAAACTTCCCAAACCCTGGGCAACTGAGGTTCTGATGTGGAGCTCTGGATGGAAAGCGTGCTGAAGTCTTGTTAAACTAGCAAGCTTTTGTTTGGAGGTCCACCGCCGAAGGCGCACAGGCCTGTGGGAACACGAGCGTTGAGACTGGGGGCGTCTAG;GGCTGCAGTAGGTCCCGGCAACCGCAGGCTCGCGGCGGGCGCTGGGCGCGGGATCCGACTCTAGTCGTAATGGAGGCGGGCGGCTTTCTGGACTCGCTCATT…
79770	TXNDC15	690	60.78115942029	41	NM_024715	GACTCGCGTAGCCGTGCGCCGATTGCCTCTCGGCCTGGGCA
10327	AKR1A1	2230	306.498206278027	444	NM_006066	GCCCAGGAGTTCTCCAAACCCGCGCTGCGGAGTGAGTGACCAAGTTCCGGCCAGTTCGACCTCGAGGATCCAGAGGTGGAGACGGTACTACCTCCCAGCTCTGTTTTCCATCCCCTTCAGGTCCTTCCTCGGGAGGCGGCGAAGGCGGTCCACCCTGCGCGTGATCCTTTATGCCCGGCCCCTGCCCCTCCCTCCGGGTGGAACTTCCCCCTCACCGCCAGACTTAAGCTGAGGATCGTTGGATCTCTGGCGGGGTGCAGAACTGAGCCCAGGCCACAGTACCCTATTCACGCTCTGTGCTTGTGCCAAGGTTTCAAGTGATCCTCCCGCCTCAGCCTGCCCAGGTGCTGAGATTACATGTATGAGCCACTGCACCTGGAAAGGAGCCAGAAATGTGAA…
8829	NRP1	2445	238.638036809816	210	NM_003873	AGGATGCAGGCGACTTGAGACACAAAAAGAGAAGCGTTCCTCTCGGATCCAGGCATTGCCTCGCTGCTTTCTTTTCTCCAAGACGGGCTGAGGATTGTACAGCTCTAGGCGGAGTTGGGGCTCTTCGGATCGCTTAGATTCTCCTCTTTGCTGCATTTCCCCCCACGTCCTCGTTCTCCCGCGTCTGCCTGCGGACCCGGAGAAGGGAGA
23036	ZNF292	82	13.390243902439	16	NM_015021	GGAGCGGGGTGTGAAG
56616	DIABLO	2312;1749	25.291955017301;155.423670668954	29;159	NM_019887;NM_001278302	GTGTGCGTCTGGCGTCCGCGCGCTGCACA;GTGTGCGTCTGGCGTCCGCGCGCTGCACAATGGCGGCTCTGAAGAGTTGGCTGTCGCGCAGCGTAACTTCATTCTTCAGGTTCCTGCTTGGCTCGAGTTTGAGTTTACAGCCCCTGCAAGTAAATCCAAGAGCCTGTTACAGATTGGCGGTCGTGCCTT
1477	CSTF1	1634	174.750917992656	171	NM_001033522	AGGAGAGAGCGGGATACCAAGAGAACCGGACCAGCTGGTACTGGGACACGGGGAGAGTAGCTGGTGCGGTCGGCTGGGGCATTTAGAGAAAACCACAGAAACGACTGGGGCGAGACTGGAAGAGTCGAGAGTTAGCAAGCTGGCAGGGAAACTGTCTTCCTTTTCTCCAAG
51684	SUFU	88	155.568181818182	160	NM_001178133	CTGGGCGGACAGTGCGCCGTGCGCAGGCGCGGAGCTAGACCTCGCTGCAGCCCCCATCGCCTCGGGGAGTCTCACCCACCGAGTCCGCCCGCTGGCCCGTCAGTGCTCTCCCCGTCGTTTGCCCTCTCCAGTTCCCCCAGTGCCTGCCCTACGCACCCCG
54993	ZSCAN2	236	226.313559322034	239	NM_017894	GGGCCTCTCCCGTCCATTGTTCTCGGTGCCCCACGGGCTTGAGCCGGGGTGAATCTGGAGGGGCCGGGCCGAGCCCGGGGGCGCTTTCGCACGCGAAGCAACCGCTAGAGCAGGACCTGGTCTCCCGAGAGCGGGACTACTTGTTGATATTTGAGGAGGGAAGTGTCTTACCTGAGAGCCTGGCTGGAGAAGACTGAGGTCCAAGGCTTGAAGCCTAAGTGATTGCCCCAGGACTGTGG
51128	SAR1B	2691	178.941285767373	235	NM_001033503	GATGCGAACTGGGGCCACGGCAGCCATCGCGCTTTGCAGTTCGGTCTCCTGGTGTACGGCCAACGCCAAGTAGGGGATTGCGTTCCCTCCAGTCGCAGAGTTTCCCTCTTGTCGCCCAGGCTGGAGTGAAGTGGCACGATCTCGGCTTACTGCAAGCTCCGCCTCCCGGGTTCACGCCATTCTCCTGCCTCAGCCTCCCGAGTAGCTGGGACTACAGACCCTATCAGATTTGGAT
10283	CWC27	795	205.559748427673	207	NM_001297644	GGGTCCGGTAACAACATGGCGGCGTCCGTGAGGGGCTCCTTTGGGCAGGGGTAGTGTTTGGTGTCCCTGTCTTGCGTGATATTGACAAACTGAAGCTTTCCTGCACCACTGGACTTAAGGAAGAGTGTACTCGTAGGCGGACAGCTTTAGTGGCCGGCCGGCCGCTCTCATCCCCCGTAAGGAGCAGAGTCCTTTGTACTGACCAAG
51130	ASB3	1356;1356	149.278761061947;139.278761061947	156;146	NM_145863;NM_016115	GTCGCCTGCGCGTCTCTCGTTTTCGGACGGCTGCAGCATCGCGGTGGGGATCGAAAGCGGGGGCTTCTGGGACGCAGCTCTGGAGACGCGGCCTCGGACCAGCCATTTCGGTGTAGAAGTGGCAGCACGGCAGATTCATCTGAAAACTACATTAAG;GTCGCCTGCGCGTCTCTCGTTTTCGGACGGCTGCAGCATCGCGGTGGGGATCGAAAGCGGGGGCTTCTGGGACGCAGCTCTGGAGACGCGGCCTCGGACCAGCCATTTCGGTGTAGAAGTGGCAGCACGGCAGACTGGTCAAACAA
55830	GLT8D1	785;785;784	965.735031847134;740.735031847134;714.24362244898	966;741;714	NM_001278280;NM_018446;NM_001278281	GCGCGTCAGTAGCCGGGCCTTCTAAGCCCGGGAGAGCGATGGCGGCGGCCCCGGAAGCGGAAGTCTCCGACGGGCCGGTACAGCCCGTGTCCCCGCCCCGCGCCATCGCTAGGCGACGTGCGCTTTTGCCGCGCCGTGCTGCCCGCGAGGGCAGCTGAGGTGGTGGTGGCGGCCGCCTTGTCGAGGCATCGCGCGCCCGTGAAGTGTTCGCCGTCAGTGCTGTTGGGTGCCTGGAGCCGCGTCCCCCGTCCCGAAAACTGTCCTTGACAGTACTTGCGCGGCCCAACGGCCGCCGGCGCCCCCGCGTCTCCATGGCGACGGCCTTTTTCCCTGCGAGGACCCCGGCGGCAGGGCTGCCCCGCGGCGCCTGCTTGGCGCGACGCTCTAGCGGTTACCGCT…
51593	SRRT	2620	194.831679389313	170	NM_015908	GTCCCACTTTTGTTCGCCTCTCTTCGGCCCTCTACTCAAGAGCTCCGTCTCCGTCTCGCCCTCCTCGAAGTCCTCGTCGCGCGCCCGCGACCCAGGTCGCCCTGAAATCTAGCCCGTCCGAGCGCGAGTCCAACGGCCGCGGCCGCACCAAGGCCCCCTCAGACCGTGCC
9088	PKMYT1	53	192.716981132075	150	NM_004203	GTGAGGCGAGACGGCCCGATCGCCCAGGGCCCCGGAAGCTGCGGAGGTCACCCCCGCCTGGCCTTAGCTCAGGGACACCCTGGATTCACGTGGGAGCCCCTGCTCCTGCCTCCCCCGTCCCACCACTGAGGCTGTTGGGCCAGGCCAGTC
79944	L2HGDH	270	73.5481481481481	76	NM_024884	AAAGAGCGCGGGTCCTCGGCCGTGGAGGGTCAAGTGGCTTCTTCTGAGCGCTGAGGGAGGGGAGCGTGCGTAGGGG
54879	ST7L	682	17.230205278592	18	NM_017744	GCCTGCGATAGCGGCAAG
11231	SEC63	213	80.901408450704	105	NM_007214	GGCAGTGTCCAAGCTACGCCACTCGGGCCGGGGCGTTGGGAGCGGGAGTGCAGAGCGTGGTCGTGGCGGCGGCGGTGAGAAGAGCGAGGCGGAGGAGGGGGTGCC
121053	C12orf45	3846	18.6866874674987	15	NM_152318	AGGCTTGAGGGAAGC
9968	MED12	335	132.69552238806	196	NM_005120	GTCCGATGGTTCCCGGCGTACCTCGGCTTCCCTCGGTAGTTTCCGGCAATGGTCGAGAGTTTCTAACGTGCCCCCTTGTTGTCTCTCGGCCGCCGTCCTCTCAACCACCGCCCCCCTTTTCGGCTCCCTCTCCCCCTTCCCGTTCCCCCAGTCAGCCTGGCCCTGCTGGTGCCTCCGGCGCTACGGGCTGGGCAAG
83549	UCK1	652	19.090490797546	16	NM_001261451	GGGAGCGGAGGCCGAG
6446	SGK1	74	56.567567567568	57	NM_005627	AGCATACGCCGAGCCGGTCTTTGAGCGCTAACGTCTTTCTGTCTCCCCGCGGTGGTG
4194	MDM4	1060	24.018867924528	7	NM_001278518	TACCAAA
9792	SERTAD2	88	187.045454545455	192	NM_014755	ACCATTGTATAATGCTCGGGGCGCGCAGGCAGAGAACGGCGGAGTCTTAGCTTCAGCCTCGCCTGCTGCCCGCTCCCCGGCGCCACCCTCGGGCCCCTGGAGCGGGGCACTCCGCATGGAGCGGGAGTAGCTGAGGAGTGGGCGGAAACCCCTCCTGATGCGTTAGTTCCCAGGTGGAGCTGCATGTGATAT
124995	MRPL10	182	89.7087912087912	87	NM_148887	GTCCATTCTTCCGGTGGAGATGGCTGCGGCCGTGGCGGGGATGCTGCGAGGGGGTCTCCTGCCCCAGGCGGGCTAGAGTGCAGTGGC
3164	NR4A1	5834	499.426122728831	517	NM_001202234	TAGCTGGGACTACAGGCACCCACCACCACGCCCGGCTAATTTTTGTATTTTTAGTAGAGACAGGGTTTCACCATATTGGCCAGGCTGGTCTGGAACTCCTGACCTTGTGATCCGCCTGCCTCGGCCTCCTAAAGTGCTGGGATTACAGGCGTGAGCCACCGCGCCTGGCAGGCTCATTCCCTTTTTATGCCTTCGTTTTTGATAGATGACCTGGGGATGGGAGAAATGCTGCAGAGGTGGTTTATTTACAGTGAATTGTTAATTTGGTTGTGGGGCTAGTATTAGGGGCACATTGGGAAAACACAGGCTGGGCAGAGGTTGGTAGGTTCACAACAGTTATGCCCACTGGGTGCTGATGGATTTGGGGGCTGTCGTCGGCCTGGCTTGGGGCCCTAGTGG…
91942	NDUFAF2	2034	59.088495575221	70	NM_174889	GGTCGGCGGCTGGAGCATTACCCCTACTGCGGGTCCCGCTGCTGGCAGCGCTGGAAACTGGGTGGACGGC
7227	TRPS1	467	529.256959314775	480	NM_014112	AGCGTCCTCTTTTTTGGTGCTGCTGGTTTCTCCAGACCTCGCGTCCTCTCGATTGCTCTCTCGCCTTCCTATTTCTTTTTTTTTTTTTTAAACAAAAAACAACACCCCCTCCCCTCTCCCACCCGGCACCGGGCACATCCTTGCTCTATTTCCTTTCTCTTTCTCTCTCTCTCTCTCTCTCTCTCTTTTTTAATAAGGGTGGGGGAGGGAAAGGGGGGGGAGGCAGGAAAGACCTTTTTCTCTCCCCCCCGCAATAATCCAAGATCAACTCTGCAAACAACAGAAGACGGTTCATGGCTTTGGCCGCCGCGCCACCATCTTTCGGGCTGCCGAGGGTGTTCTTGACGATTAATCAACAGATGTACAGATCAGCTCTCAAAATGTCTTCTGTGTCTTCTG…
6426	SRSF1	1344	100.545386904762	90	NM_001078166	GGGAGACGTGGTGCCGCTGCGGGCTCGCTCTGCCGTGCGCTAGGCTTGGTGGGAAGGCCTGTTCTCGAGTCCGCGCTTTTCGTCACCGCC
55968	NSFL1C	4690	17.496801705757	20	NM_018839	GGAAGGCGCACGGGGCGAAG
55324	ABCF3	5961	18.833417211877	9	NM_018358	GAGTGGAAC
131034	CPNE4	184	402.902173913043	449	NM_130808	GTCAGAAGGTGGAAATCTCTCTGTGAGAAGCTGCCATCTCCCCGCCACCCGCTCGTCCCCTTCTCTTTCTGCCACCCTCCTTTCCTTCCTCCCTCGCTCCACTCCACTCCCTCCCTCTTTTCTCAGTACCCTCCTCTTTACTCTCCGAGTTAACTGAGAGCCGACCTGACATCTCCAACATTTTCACCCTCTTCCCCCACCCCCATCACCGAGAATGGAGTCAGGGTTTCCGGAGAGACCGAACTCTGCTCTCAGCACCTTTCCCAGCCGCTGTTGCTAAACTGACCTCGGAGGACGAGAGGGGAAGGAGGTGCGACGCCCCTTACATCAGTACAAAACTACCACACCAACCACCTCCACTTCAAAGCCGGATTTTGCATCCTGGGGGCGGGACAGACC…
54849	DEF8	358	51.801675977654	43	NM_001242821	GCAGCCGGGAGACAGATGCGAGGCGGCGGTCAGGTGGGATGCT
8537	BCAS1	436	165.213302752294	161	NM_003657	AGCCAGCAGGCTCTGCACAAGGAAGCAAAGTGCAGGGAGCCAGGCTCCACCGACAGCCAGGCACTGGGCAGCACGCACTGGAGACCCAGGACCCTGTGCAGGAGCAGCTCCGGGTGACACGAGGGGACTGAAGATACTCCCACAGGGGCTCAGCAGGAGCA
84168	ANTXR1	245	129.477551020408	136	NM_018153	TCCGGGGAGTTGCGAGGGAGCGAGGGGGAATAAAGGACCCGCGAGGAAGGGCCCGCGGATGGCGCGTCCCTGAGGGTCGTGGCGAGTTCGCGGAGCGTGGGAAGGAGCGGACCCTGCTCTCCCCGGGCTGCGGGCC
4836	NMT1	1896	17.7647679324894	24	NM_021079	GGAGCCCTGCTCTCGCAACTCAAG
8650	NUMB	292	320.178082191781	317	NM_003744	GTCATGGGGGAGGTGGTGGCGCTTGGTGGCCACTGGCGGCCGAGGTAGAGGCAGTGGCGCTTGAGTTGGTCGGGGGCAGCGGCAGATTTGAGGCTTAAGCAACTTCTTCCGGGGAAGAGTGCCAGTGCAGCCACTGTTACAATTCAAGATCTTGATCTATATCCATAGATTGGAATATTGGTGGGCCAGCAATCCTCAGACGCCTCACTTAGGACAAATGAGGAAACTGAGGCTTGGTGAAGTTACGAAACTTGTCCAAAATCACACAACTTGTAAAGGGCACAGCCAAGATTCAGAGCCAGGCTGTAAAAATTAAA
10092	ARPC5	4375	93.348114285714	100	NM_001270439	GAGGGAAGTGAATCAGGCGCCGGGTAGTGGGTTGCTGGGCTGGGCTTGCTGAGGTAGAGGCAGCGCCAAGAAGAGGCCTTTGCCGCTGGTCGGGATTGGG
100462977	MTRNR2L1	46950	491.843897763578	200	NM_001190452	CAGGCATGCTTACAAGGAAAGGTTAAAAAAAGTAAAAGGAACTCAGCGAATCTTACCCCTCCTGTTTATCAAAAACATCACCTCTAGCATTACCAGTACTAGAGGCACCACCTGCCCAGTGACATATGTTTAATGGCTGCGGTACCCTAACCGTGTAAAGGTAGCATAATCACTTGTTCCTTAAATAGGGACTTGTCTGA
29074	MRPL18	2582	109.90704879938	119	NM_014161	GAGTTTGGGGATCTACAGCAGCCAAAGGCTTGTCCCTGACTTTATATGGCTGCTCCTGGCGAGCGACTGAGTCGTCCGTGAGGAAAAAGAGGCGAGGCTTTTCCGAGATCGTCTCAGCG
162239	ZFP1	240	160.229166666667	163	NM_153688	GCCCTTCCCCCACCACCAGCGGCGAGTGGGTGACAGAGCCCCCGTCTCCGCGCGTCTTCGCCGCCCTGCGCCGTGACCCGCTGTGGCACTGGGCCACGAGTGGAGGCTGCGCCCCTCCAGTTCTGCCTTCATAGTTCTCTGCCTTTGCCCAAAACTGCAGAAA
8505	PARG	852	268.326291079812	274	NM_003631	GACGGCAGCTTTCCGGTGGTGGGAAAGTGAACGAATCCCGAATCAAAGCGGCGCATTGAGGCAGGTGGGGTGCCAGTGGAAGAGAGAAAGCAGGCGAGTGTTTACGGCCTGACTTGGGAGGCCGGCGGATCAGCAATTGCAGAAGCAGGCAGCGGCAGAGAGGGAATGGTGCAGGCAGGCGCTGAGAAGGACGCGCAGTCCATCTCTCTCAGGTTAGTGAAATGAGGCTCTCCGCCCGGGGCCGGCCCGGGGACAGTGCGCTGCTGGTCCCAGC
342184	FMN1	932	72.820815450644	71	NM_001103184	GGAGTGGATAAACTGAGAGCGCAGGAGAAGGTAACACAAGTCAGAACTTCCACCAAGGGCATTACTGAGAC
8727	CTNNAL1	52	37.019230769231	38	NM_001286974	GCGGCGCGGAGTCCCGGCTGCGGGATAGACCGAGGGCC
23641	LDOC1	2860	83.196503496504	108	NM_012317	GCCCCTGGCCACCAAGCGCCTCCGTGGACACGCACTTCCTGCGAGGGCTCCGTGCGCACCTTGGCCGAGCCGAACCGAGCCGAGTCCTGTCCTTCCAGGCCGTTCGCA
7733	ZNF180	440	280.934090909091	286	NM_001278509	AGCAGCCATTGTCCCGCGCGCGGACGCTTGCTGTCGCCGAGCAGCTCGGCCCTTCAGACTTAACCCCCAGCGGCCTTGCGGATGCTGACTAGGAGAGGGGACCGAACTAGCTTAACCCGAGTCGGCCGTGTTGCAGAATCGGGGCAGGGGGTTGCCTAACCCGAGTTCGTCCTGCCGCAGAGCCGTGCTAGGCACTGAGGCGGTGACAGGCCCAGCCTGGGCTGCGGGCCAGCGGACGCCCAGTGCAGCTCAGGACCTCAGCACCCTGCTGTGCCTGGAGGAGAGC
55739	CARKD	746	39.588471849866	31	NM_001242882	GGGGGCAGCTGGGAATCCGGAATGCTGCCCG
285343	TCAIM	340;340;97	132.997058823529;132.997058823529;585.80412371134	135;135;601	NM_001029839;NM_173826;NM_001282915	GCGGGCGGAGCGACTGTCCTCCCTTCTGGTGTACTGGGTGGGAGGTGGAACTAGTCGGACAAAGCCCTCGCGTCGGACCCTTGCCAGAACTCAATTAATGGATGCCTCGAAGTTGACGTACATATATATTCAGAA;GCGGGCGGAGCGACTGTCCTCCCTTCTGGTGTACTGGGTGGGAGGTGGAACTAGTCGGACAAAGCCCTCGCGTCGGACCCTTGCCAGAACTCAATTAATGGATGCCTCGAAGTTGACGTACATATATATTCAGAA;CTCCTCCAGCAGTCCCTTTCCCCTTCTTCCCCAAGATCCAGCGCGTGCTCGGTTGCCCTTCTCCGTTCCTTGCAGGCCCTTGGGTCAGGACCCACCACCTGCCGGACCATCATTTTCCGAGTCCCTC…
6294	SAFB	12153	101.001481115774	102	NM_001201340	GACTGGAGCGGTTCCCTCGCAGGCGGCGCCATTTTGTGCTAGGAGCCTGATAAAACCGGCCCGGTTCTGTGGAAAGTGGGCGGCGGAGCCAGGGTCCCTGGA
114876	OSBPL1A	797	152.289836888331	151	NM_080597	GGAGACAGACGTTACGCGGGCTCGAGCGTCCTCGGGGAGTGCCAGCCAGAGTTGGTGACGACCACTTCCTCGACGTGGGGCGGGCGGACGGGAAGCCTGGGGTCGTGGCCACCGCCTCGGGAGCTCTGGGAGCCCGGGTGACCGCGTAGAA
4731	NDUFV3	3788	42.521647307286	42	NM_001001503	GCAGCTGCTGTGGCCCTGCTTGGTGCGCCCGCTGTCACCGCC
23193	GANAB	1247	168.332798716921	189	NM_001278194	GCACAAGATGGCGGCGGTAGCGGCAGTGGCGGCGCGTAGGAGGCGGTCTTGGGCGTCTTTGGTACTGGCTTTTTTAGGGGTCTGCCTGGGGATTACCCTTGCTGTGGATAGAAGCAACTTTAAGACCTGTGAAGAGAGTTCTTTCTGCAAGTGTTGCTGGTGCTAGAGCTTCAGGGGCTTCAAAAGAAC
1973	EIF4A1	3863	16.517473466218	16	NM_001416	CTAGTTTCTAAGGATC
27076	LYPD3	3374	43.103734439834	40	NM_014400	GGCACATCCAGGGGGGACGCCAAGGGAGCAGGACGGAGCC
26973	CHORDC1	916	113.755458515284	117	NM_012124	TCCGGAAGCCGGTAGCCGCCTCAGTCGTCAGACCGGTGCTAGCGACACGGGAGTGGCAAACGCATCCTCTTGCCGTTCCCGGTGTTTGGGCCTTGCCTGTGACGGTGGGAAAAGAAA
29934	SNX12	1453	84.681348933242	109	NM_001256187	GCCTGTGGGTTGGCTAGTTATTTTGCAAGCGGGAGGGGCCGTGCGCGCTCCTGCCTCAGGCCTCTGTCCCCCACCCCCTTTCCCCGGTCCCAGGCTCTCCTTCGGAAAG
8394	PIP5K1A	4310	383.847331786543	420	NM_001135638	GAAGCGGCCGGGTTGGGCGATTAACAGGCCGTGGTTAGGAAGGACGGAGAAGGGGCGTTCGCTCCTTTGGGACTTTTCATGCCTCGTTTTTTTTTCAGATGTGGCTTGGTCTGGGCGCAAGGTCCCAGCAGCCAGCTTAAGCTTACTCTTCTGTGAAAGGGGAAAGTATCCCCTGTGGAAAGCGGTTAAACTTGTGGAGGGGGTGCGGGACGTGAGTTCTTCCCCATGCCAGGCGAATGGTGTGGCCTTGAGCTGGTCCAGGAGCCGGCTCGACGTGTCTGAGGGAGGCCCCGGAGGGGGCGGGGAGGTGGCCCACAGAACGCGGGTTCTGTAAAGAGACGTTGGGAAGATTCGATTCCGAGAAGAGGAAGAACCGGATTGAAAGAGAGCCAGGCCGCT…
124540	MSI2	169	23.9940828402367	24	NM_170721	AGCTTTTGTAAGTTACACGTCAAA
56650	CLDND1	634;633	47.973186119874;123.938388625592	47;123	NM_001040182;NM_019895	AGGGTGCTGTGGTCTGAGCTAGAGGGTGAAGCTGGCGGAGCAGGAGG;AGGGTGCTGTGGTCTGAGCTAGAGGGTGAAGCTGGCGGAGCAGGAGGATGGGCGTATGCAGGTGATAGACTAGAGAACAAGACCTCTGTCTCCGTAGCATCCTGGAGCAGTCTGAATGCCAGA
26234	FBXL5	684	58.690058479532	63	NM_001193535	GGCGAGGGTGTCTATGGAGAGGCGGCGGCCGCGGCTGCTGAGGCGGAGGCTGAGGCAGTGGCG
11154	AP4S1	279	371	371	NM_001254728	GGGCTTTGGTCCCATTTCTATGCGCTCGGTCGCCCGTCGTAACTTATTCCACTTTGCGTCCCCTCTTCTTTCCTTTTCTGGAATGGGTTGTGGGGGGGTTGGGAGAGGGGGAGGAGCGATTTTTTTTTTCTTGGGAGAAGAAGAGGTAGTGAATTCCTTTAGATCTTGACGATGATGGGTAGAGGGAGAGAAGTTTGAAGGAGACTGGCTAGACTAACAATTTGATACGGTAGAAATGAATGGGCTCACAAATATTGTCATCAATAGACTATTTTGATCGAAACAGAAAATAAAAGCACTGTTCCAGTTACAGCCATCCCTTGTCATAACTTTTGAACTGTATTTGGAAAAATACTGGCCAGGAAAGAAAA
50628	GEMIN4	68	102.970588235294	98	NM_015721	GGCTCCTGCGTCTCCCATCGTGCCGTGCGTCCCGCGCCGCGTTCGAGTTCTCGGAGGGGAGGGGGCGTTAGCCCCGCGCAGCCGCCGGCGTCGCCGCC
10514	MYBBP1A	1717	49.5445544554455	65	NM_014520	GCCCTGACCTGGAAGCGGCTGGGGCCGGAGCACACGTGTTTCGTGTTTCGGTGAGTGTGGCGGAG
54920	DUS2	286	210.520979020979	191	NM_001271763	TCGCGTACGGTGGCTGGCGAGGCTCAGTACGGTGTGTGGAGCTGGAGCACCGTGAGGAAGAAGCGAGGTTCTTTTTAAGAGTTCAGCTGCGAGATATCAAACAAAGAATTACTCTGTACAAAGCCAGAACACATATATCAAAGTAATCCTGAAGTATCAGAACAAAATAATAGGCTGTAACAGAGGAGGAA
100526739	APITD1-CORT	291;291;97	71.522336769759;71.522336769759;529	80;80;540	NM_001270517;NM_198544;NM_001243768	GCGGCGGGAAAATCCGACCTGGCCGCGCACCACCGCCCCTTCTCGGCCCTCCTGCGTTTGCCCAGGGTCGGCCCGCAGTG;GCGGCGGGAAAATCCGACCTGGCCGCGCACCACCGCCCCTTCTCGGCCCTCCTGCGTTTGCCCAGGGTCGGCCCGCAGTG;GCGGCTGGACCCTGGCCTGCGCTGGCTGGGGAGGAAGCGGTTCTAGGGGAGCGTGCGGGCGCCGGGGTCCGGCGGCGAGAGGCCACCTTCTGGCCTTGCGATGAATCCTCGGTTTCCCCTTCTCAGATGGGGTTTTCGTGAGGGTACAACGTCGGCATTAGACATTCCAGGTGACGCCCGTACGCGGTGGGCGGTTCGGGCCGGAGCTCTGGAACGCTGGCCCTGGAGGCGTCGACC…
593	BCKDHA	1837	10.838323353293	7	NM_001164783	AGCCAAG
51715	RAB23	168;220	153.607142857143;619.154545454545	149;618	NM_001278666;NM_016277	GAGGGGAGTCGAGACTCCCGCGCCCCACCACCCCCGGCGGAGCTGCTGCTGAGCCACTCAATCTGAGCCCTGGCTACTAATAAAATTTGAGAGGGAAGATCTGATCTCCTAGAATTAGAGTTGGTACAGAAACCATTTCAGCTCCAAAA;GAGGGGAGTCGAGACTCCCGCGCCCCACCACCCCCGGCGGAGCTGCTGCTGAGCCACTCAATCTGAGCCCTGGCTACTAATAAAGTTCGTTTAAAAATCATAATCATTCTTAAGAGAGCGAAAGAGGGTGCGAACTAGCCGCTCGGCCCCGCAGGGAGAGCTGGCGCGTCGGGAGGAGACAGCGGCGGCAGCGGTTGCGCCGCGACCAGGAGGAGCCGGTGGCGCCGGGCGGCGGGTCCGCGGCCGGTG…
25847	ANAPC13	252	576.123015873016	667	NM_001242374	GGGTGCCGGTAAGGGTTTCCAGCGCCCCCGGCCTAGGTTTTGGAGGCGCGGGAATGCGTTCGTTGCTCAGTGTCGGACTTCCCCCTATTCCCATCGGCCGAGGCTGTCACTTTACGCTCATAACCGTTTTTCTTTACTGCACTCGTGTCGGGAGGAAAGGGACTTGCGTGGCACCCCCAGACCTCCCCGTCTCCGCTTCCACGTTTGGTACATCCTGCCTGAGGCAGGAAGCCGCAGCTGAGGGACGGCCTGTCGTACGGTGCGGATGGTGGTGGCCTGCGAGGCTCATTTCTAGCAAGGAACAAGGCTTTCCCGCTTTGATTTTATAAATATTATGTTTACAAAGCTGTAATATATAGAAATTGATAAGACGTGTCCCTGTCCCTGGAAACGCAGGCA…
3985	LIMK2	729	128.012345679012	154	NM_005569	AGGGCGCCGTAGGCGGTGCATCCCGTTCGCGCCTGGGGCTGTGGTCTTCCCGCGCCTGAGGCGGCGGCGGCAGGAGCTGAGGGGAGTTGTAGGGAACTGAGGGGAGCTGCTGTGTCCCCCGCCTCCTCCTCCCCATTTCCGCGCTCCCGGGACC
10524	KAT5	350;312	226.825714285714;252.342948717949	250;250	NM_182710;NM_006388	ACGTGACGGACTCAGTAGACCGCCACTGGCTGTGCACGTTATGGGGTTTCCACCTAGGGCTCGGCCTGAGGCTTGTAACACTCCGTTTTCCCCCGAGTCACAGGGGCAGTCTTGCCCCTCGCAGCTGGGTCGCGGTGTCTCTCAAAGGTCCCCCTCTACAGGGGCTTCGTGAGGCCCGGGCCCACAGGGCGCTCGGTCCCGGAAGTGACGTCTCCCAGAGGGGCCGGAAGTGGCAGTGGAGGGAGGGAAG;ACGTGACGGACTCAGTAGACCGCCACTGGCTGTGCACGTTATGGGGTTTCCACCTAGGGCTCGGCCTGAGGCTTGTAACACTCCGTTTTCCCCCGAGTCACAGGGGCAGTCTTGCCCCTCGCAGCTGGGTCGCGGTGTCTCTCAAAGG…
51023	MRPS18C	3942	17.749619482496	19	NM_001297769	GTGGAAGAAACGCGGAACC
51133	KCTD3	154	17	17	NM_016121	GTCCGGAGCCGCCGGAG
51062	ATL1	103;103;103	117.941747572816;117.941747572816;117.941747572816	121;121;121	NM_181598;NM_001127713;NM_015915	AGAGTCTGAGCGAACTGCGCCCAGCGCGGGCACGGAGCCTCCCACCGCCAGCAACCTGCGGCCCCGGAGAAGGCAGCGAGCGCAGTGACAGCGCCTCACCGCCACCAGCTCCTGGACCACC;AGAGTCTGAGCGAACTGCGCCCAGCGCGGGCACGGAGCCTCCCACCGCCAGCAACCTGCGGCCCCGGAGAAGGCAGCGAGCGCAGTGACAGCGCCTCACCGCCACCAGCTCCTGGACCACC;AGAGTCTGAGCGAACTGCGCCCAGCGCGGGCACGGAGCCTCCCACCGCCAGCAACCTGCGGCCCCGGAGAAGGCAGCGAGCGCAGTGACAGCGCCTCACCGCCACCAGCTCCTGGACCACC
9686	VGLL4	846;693	170.300236406619;427.670995670996	159;436	NM_014667;NM_001128219	GCGAGTGTGAAGTGCAGCGCTGGAGTGCAACATGCTGTAATGGGAGGAAACCCAGCGGCGTCGGAGCGCCCGGGACCGCCGCGGCCGTTCTGAGCGCAGTGGCGCCGAGCAGCCCCTCCCGCAGCCGGTGTGACCTGTCCCTTCAGGCTCCAACCAGGA;GCGGGAAGAGGAAGCGGCGGCATAGGAGTCATGCCAAGCATAGCCCTCATGTCAGCGCTGCCGGCTTGCAGCGGGCTGTGAGAGGGGCCGGCGCCGCTTTGTCCTAGGAAACGGGCTGCGCGTTTCTCTTTTTCACTCTTTTCCATTTCCAGGAAGGACTTGTAAGGACTTCTGAAACGCTGTTTTCATACTCGATCGGGGATACAGTACATACACCGTCTACCAGTAAGCCCTTGAAG…
54795	TRPM4	383	75.271540469974	82	NM_001195227	GCTCTGGGCGGGTCTGGAAGCAGAGCCGGCGGAGGGAGCGCCGGGGCCCTGGGCTGCAGGAGGTTGCGGCGGCCGCGGCAGC
5692	PSMB4	2739	9.7721796276013	7	NM_002796	GACTAAG
83658	DYNLRB1	4120	214.566504854369	237	NM_177953	GCAGAAAGGCACAGGACTCGCTAAGTGTTCGCTACGCGGGGCTACCGGATCGGTCGGAAATGGCTGAAGTGGAGAGATCGCCTGAGCCCAGGAGGTCAAGGCTACAGTGAGCCGTGACTGCACCACTGCACTCCACCCTGGGCAGAGGTGGAGGAGACACTGAAGCGACTGCAGAGCCAGAAGGGAGTGCAGGGAATCATCGTCGTGAACACAGAAGGCATTCCCATCAAGAGCACC
83892	KCTD10	272	89.8639705882353	90	NM_031954	GGCCCCGCCTCCGCCCCCGGCTGGCGTGAGCTGGGTGTTTCCTGCCTCTCTCAGTCCGGGTTTGGAGACTCCTGCGTCCTCCGACTTTTC
51056	LAP3	784	29.932397959184	27	NM_015907	GGCGGTGCGAGGGGCCGAGCCGACAAG
124936	CYB5D2	48209	498.327926320811	512	NM_144611	GGGCCAGGCGCGGTGGCTCACGCCTGTAATCCCAGCACTTTGGGAGGCCGAGACGGGTGGATCACCTGAGGTCAGGAGTTCGAGACCAGCCTGACCAACGTGGTGAAACCCTGTCTCTACTAAATACAAAATATTAGCCGGACGTGGGGGCGCGTGCCTGTAATCCCAGCTACTTGGGAGGCTGAGGCAGGAGAATCGCTTGAACCCGGGAGGCGGAGGTTGCAGTGAGCCGAGATTCCGCCAGTGCACTCCAGCCTGGACAACAAGAGCTAAAACTCTGTCTCAGAAAAAAAAAAAAAAAGTACCTGGAAAAAGTCGCAGACAGCGAGCTTTTCGCCAGTGCCAGGAATACAGATAAAACGAGAGAGACTAAGGGAGGGAGCGCGAGCACTAGCGCGC…
991	CDC20	105	143.695238095238	144	NM_001255	GGATTTTGAAGGAGCCAATAGGCGCTCGGAGCGGAGAGTTTAAGAGGCGTAAGCCAGGCGTGTTAAAGCCGGTCGGAACTGCTCCGGAGGGCACGGGCTCCGTAGGCACCAACTGCAAGGACCCCTCCCCCTGCGGGCGCTCCC
26528	DAZAP1	153	63.764705882353	65	NM_170711	GACCTTCCGGAGGCGGGAGCGAGCGAGGAGGCCCGGGAGCGCCGAGCGTCGCCGCCGCCGCCGCC
6606	SMN1	3564	27.352974186308	15	NM_022874	ACCCGCGGGTTTGCT
55773	TBC1D23	148	22.135135135135	19	NM_018309	GACGTGGACGTCAACAGCA
114327	EFHC1	390	49.320512820513	44	NM_018100	GAGGACGAAGCAGGACCTAGGTGGCGGCGGTGGTACCGGCTGCA
4717	NDUFC1	5265;5273;5273	25.7616334283;27.360326190025;27.505784183577	23;23;23	NM_001184988;NM_001184991;NM_001184986	GAGACTGAGCTGGGCCACGCAAG;GAGACTGAGCTGGGCCACGCAAG;GAGACTGAGCTGGGCCACGCAAG
10269	ZMPSTE24	8514	38.140709419779	17	NM_005857	GGCGGAACCGGGTGGCC
54973	CPSF3L	3083;3153	507.352903016542;51.279416428798	507;52	NM_001256456;NM_017871	GCAGTGCATCACCGCAGGCGGGCCTCGCGGGTCCGGGAGCGCGGCGGAGACGATGCCTGAGATCAGAGTCACGCCCTTGGGTGCCTGCCCTGTGCTGTCCTGGAACCTGGTCCTTCCACCGGGCAGGGGGTCGAGGGCACCTTCCAGCACAGACACCAGGACGGGATTCCATGTCCTCCCCCATGGCGTGAGCGCTTCCTCGGAGGGTGCCCCCCGCCCCGGTGTGGACACTGTGCTGTGAACACCCCTGGCCTGTGCACACCCCATGGCATTTTGCAGCTGTTTGCATGGGCCCCACTGCCCTCCCCTGCTCTCTGGGTCCTCCGTGGGGTCCTCCCAGCCTGCCCCTTTCCCATTTGGCCTCTTGGCTGCCTGTTCTGCCCACTCTCTGGACATCTG…
23126	POGZ	198	102.510101010101	43	NM_145796	GCCTTCCTCGGGTCAGACTACCGGCGGCGACGACCACAGGAGC
10577	NPC2	1846	47.38082340195	27	NM_006432	CCCGAGCTTGGAACTTCGTTATCCGCG
1832	DSP	164	209.682926829268	51.5	NM_004415	CCCGCCTCGCTTATGCCTCGGCGCTGAGCCGCTCTCCCGATTGCCCGCCGAC
11162	NUDT6	130	407.3	422	NM_198041	AGCTGTAACGGCATCTGTGAAAGAAGATAGGTTCCAGGAACGGAACTGCCACTTAGATTGTAAATTCCTGAAAAACAGGACGTTTTTGCATCTCCTCCCGGCTTCCCCATCCCTAAACCAACGTCTGTTGAATTAAACTACCAAACAAAATAACTGCAGTACAGCAATGGCGATCAGAAGGTAGAACAGCTGTATGGCTGCACATTCCCATCCTCCAAAGCCGATTTATTGCCCCTGCTGCTTCCCTGGGCTTCTGCTTTCACCACGCAGAATCGGATTCATCAACGTTGACTCTGTGGCTGAGAGAAGGGCCCAGCAGATTACCAGGATATGCTTCACATCAAGTAGGAGTTGCAGGAGCTGTATTTGATGAAAGTACTAGAAAAATACTGGTTGTAC…
83695	RHNO1	2833;2833	139.912460289446;139.912460289446	124;124	NM_001252499;NM_001252500	GCGGTCTGCCAGGAGCTGCGGCCCCGTCCGGCCCGGGCTGGCATGGGTTGGAATTGGAGCCTATCCCCCAACCCGAAGGCTAACAGCATCATGTGGTTACTAACTGTTCCTCATTCACCGGTTG;GCGGTCTGCCAGGAGCTGCGGCCCCGTCCGGCCCGGGCTGGCATGGGTTGGAATTGGAGCCTATCCCCCAACCCGAAGGCTAACAGCATCATGTGGTTACTAACTGTTCCTCATTCACCGGTTG
10430	TMEM147	237	255.84388185654	269	NM_001242597	GGAGACGCCGCCTCGCGATCCCCGCGCGGGCGGGACCGGGCGGCCGGCATCATGACCCTGTTTCACTTCGGGAACTGCTTCGCTCTTGCCTACTTCCCCTACTTCATCACCTACAAGTGCAGCGGCCTGTGAGTGCGGGAAGGGCGCGGGGCGGAGAGGGCGCGGGGCCCGGGCCGACCCTCACCTCCCGCTTCTCCAGGTCCGAGTACAACGCCTTCTGGAAATGCGTCCAGGCTGGAGTCACCTACCTCTTTGTCCAACTCTGCAAG
201514	ZNF584	106	325.358490566038	330	NM_173548	TGCGTGGGCCGGGGTGACTTCCTCGCGATCCCCTGCGCGAGGTGAAGGGCAGGGACCTTTGCCGCGCCTTCCACGCGCCGTGCCCCACCGGCGAGTGGCTCCATCTTCCTCAGACTTATCGCTCGCGGACAGGCGCCGTGGGTCTCCCGGGCCTCCGTACCGTCCTCCTTCCCAGCGGCTCCGGGAAGCGGTTCCCTGTCTTCGGACGCATTTCACCCGCGCGGGGAGAGCTTCCCGGGAAGGTTCCACGGCGGCCGAGGGTTTCCGCGCCCGGGACGCGTTTCGGCTGAGGCCGTGGGTCCAGTCCACGGGTTCTGCCCGCACGGTCCA
1604	CD55	54	254.222222222222	252	NM_001300904	AGGGCCCCCGGGGCGTATGACGCCGGAGCCCTCTGACCGCACCTCTGACCACAACAAACCCCTACTCCACCCGTCTTGTTTGTCCCACCCTTGGTGACGCAGAGCCCCAGCCCAGACCCCGCCCAAAGCACTCATTTAACTGGTATTGCGGAGCCACGAGGCTTCTGCTTACTGCAACTCGCTCCGGCCGCTGGGCGTAGCTGCGACTCGGCGGAGTCCCGGCGGCGCGTCCTTGTTCTAACCCGGCGCGCC
79594	MUL1	1030	114.320388349515	127	NM_024544	GACTGATTTCGAGTTTCCGGTCAGGTTAGGCCGGGGGGGTGCGGTCCTGGTCGGAAGGAGGTGGAGAGTCGGGGGTCACCAGGCCTATCCTTGGCGCCACAGTCGGCCACCGGGGCTCGCCGCCGTC
5664	PSEN2	223	177.798206278027	165	NM_000447	GGGAGCTGTGTGACCATAGAAAGTGACGTGTTAAAAACCAGCGCTGCCCTCTTTGAAAGCCAGGGAGCATCATTCATTTAGCCTGCTGAGAAGAAGAAACCAAGTGTCCGGGATTCAGACCTCTCTGCGGCCCCAAGTGTTCGTGGTGCTTCCAGAGGCAGGGCT
7375	USP4	2723	19.706573632023	15	NM_003363	GGGGCCGCGGAGGAG
6945	MLX	918;1299	28.790849673203;31.040030792918	14;35	NM_170607;NM_198205	CCGGTGGGTACAAG;GCCCGCTGGCCCGTTTCCGGTCCGGTGGGTACAAG
261726	TIPRL	1110	93.083783783784	83	NM_152902	CGGAGGGAGGCGGAGGAACCGGTGTTCGCCGCCGCCGCTGCTTCAGCTTATTCCTTGTGGCCTCTGCGGGTCCTGCCTCAGCC
10236	HNRNPR	1219;1219;1218;1218	242.485643970468;242.485643970468;105.502463054187;105.502463054187	245;245;108;108	NM_001297622;NM_001297621;NM_001297620;NM_005826	AGGGGGGGGAGGGGGTGGCGCGCGCGCCATTTCTAGTCGTTTTCAAAGCGCCTCGCGCTGATTCTCACGGGCCCGGCTGCCGGCCCCCGCTCTGCCCTGGATTGGTAGCTTATGTCGATCTTGATGAAAGAGCAATTGATGCTCTCAGGGAATTTAATGAAGAAGGAGCTCTGTCTGTACTACAGCAGTTCAAGGAAAGTGACTTATCACATGTTCAGAACAAAAGTGCATTTTTATGTGGAGTT;AGGGGGGGGAGGGGGTGGCGCGCGCGCCATTTCTAGTCGTTTTCAAAGCGCCTCGCGCTGATTCTCACGGGCCCGGCTGCCGGCCCCCGCTCTGCCCTGGATTGGTAGCTTATGTCGATCTTGATGAAAGAGCAATTGATGCTCTCAGGGAAT…
387680	FAM21A	61	84.885245901639	81	NM_001291398	TGGCTGGGGCTAGGCTTCCGGGGCTCTGCAGTCCTCGGCGTGTGCTGGCAGCTTCGGAGCCCACCGAGCCGGGCGGCTAGG
323	APBB2	888	545.70045045045	620	NM_001166050	GGAGAAGTGGAATCTCGTCAGCGCCGCTCCCTGCGCGGGACTCGCGGAACGGCACTGAGCATGCTCAGTTGCCGGAGCCCGTTCTGGTCTCAAGTAGGAAGCTAGTGCGCTGTAACCGCATCTGATCTGGGCGCTCCGGGAAGGGCGAGACTGGAGCAGAGCCGCTGGGCGCCGGAGCCGAGGCGAGCGCCGCGCGCACCACTGGTTGGAGTTGCTGTGGGTGAGCTGCTGTGGTCTGTAGCCAAGCATGCTGTGGTCGGATCTGCCCAGCCGTGGAACAGAAACATTTGCTGGATGGAAAATCCATAAAAGAAAGCTCCTGTGAAAAGCTGAGGCTGACAATAATTTAAGCAAAATCAGATCGATCTCTTTGGGCTGCCTGACCTCCTTGGGTGCTTG…
3017	HIST1H2BD	2704	46.6316568047337	49	NM_138720	GATTATTTTCTCAGGTGTTTGCAACAGTGTTCTAACTATTAACGCTACG
79921	TCEAL4	25246;25345	263.524914837994;204.425567173012	261;202	NM_024863;NM_001006935	GCAGATGTAGGCACCGGTCCGAGTGCCTGCCCTCTGTCCCCGCGGCTGGGTCTCGTCTGCTCCGGTTCCTGGGCTCCTAATTCTTGGTCCAGCTTCTTCCAGGTCAGTGTGCGGGCCTTCCACGCTGCCAGCGGAACACTGGAATGGCGGAAGGGGAACGGGTCTGCGCGTCTGTTGTTCCCAGCGCTCTGCGAAGCCTGAAAAGGAGGAGCAACCTGTCCAGAATCCCCGCAGGACAGGAAAAGGAGGGGAAATCTCGAC;GCAGATGTAGGCACCGGTCCGAGTGCCTGCCCTCTGTCCCCGCGGCTGGGTCTCGTCTGCTCCGGTTCCTGGGCTCCTAATTCTTGGTCCAGCTTCTTCCAGGTCTGCGCGTCTGTTGTTCCCAGCGCTCTGCGAAG…
10055	SAE1	6997	38.846505645277	42	NM_001145714	GGCTTGAGCGGGACCGGAGCTGAGGCAGGAAGAGCCGGCGCC
7011	TEP1	51	104	104	NM_007110	CTCCCCCGGCTGCCACCCTTCCCACCGGCAGAATCCAGAGCGAAGTTTCTGCTTCCTGCTGCGGGAATCGGACGCCCCAGGCATATACAAGCTGAGTTTCAGCC
8664	EIF3D	2049	111.508052708638	101	NM_003753	CTCTTTTCCTGGTTTCTCAAGAGTGCTGCTGCTAACGCGGTCCCCGGCACGCACCATCTGTTGCCATCCCGGCCGGCCGAGGCCATTGCAGATTTTGGAAG
5504	PPP1R2	99	277.131313131313	301	NM_006241	GGCTTCGGCGTCGCGTCGCTCCTGCGCTGGAGCTCTAGGCCGGCGTCTCTCCGCGAGCCGCGGGTCAAGTGCCAGTGGCTAAGGGTGCGCGAGTAGCCGCCACCCGTTCGGCGTTGGCTCTGGCGTCGGGGTCGTTGTGTCGTGACAACCGCTGCGGTAGCCGTTTCCGAGGCAGCAGTTGCGGCCGCTTTAGCCCTGAGCGGGATCTGCGGCTGCCTGCGAGTCTCTGCTGTGCCGACCCTTCTCTTCGCGGACCCCACGCCAAGCAGCGACCCTGAGCCGACAGCCGGAGCGCCCGGCA
25875	LETMD1	1400	29.227857142857	30	NM_001243689	CTCTTCTCTCCCGCTTCTCTCGCTGTGAAG
100101267	POM121C	628	135.536624203822	190	NM_001099415	GGATAACGGGAGGTGAATTTCCATGTCAACATAGTCCTGGGATCGTGGGACTTTACCAGATCGGTTTGTAATAACACCTCGAAGACGCTATCCGATCCATCAGACCCAGTATTCCTGTCCGGGGGTACTTCCCACAGTGTGCTGGAATGGTTATCACAAGAAGGCTGTGCTGTCCCCTCGCAACTCCAGG
80127	CCDC176	93	113.258064516129	127	NM_025057	CTCCGCGCGCCGTCAGCGGCGCGGGTGGGGCATTGCCAGCTCGGCGTCCCGGTTCCCTTGGAGACAGAGCTGGCCAGGGCGGCCGCGGCTGGGCAACTACGACAGCGGAGCCCCTGGGGAAGCCAAG
529	ATP6V1E1	1448	105.468922651934	86	NM_001039366	AGGGGTTCCCTTTGCCGATTTCTCTCACCTCACCTTTCAAACCTAAACTCGAGCCTACTGTTCACCGGCCTAGCATTGCTCTCGCC
5829	PXN	2756	88.118287373004	95	NM_001243756	GGCCGAGGCTCGCGGCGGAAAAGTTGCGGGGCATAGACGAGCGGCCCCGGGACGGGCAGCTAGCGCGACCCTGAGCCGGCGCCCGTGGTCCGGCC
9814	SFI1	650	151.052307692308	132	NM_001007467	GAGGCGGGCGTGGACCGCGCGGGAGTTAAGAAGCAGGTCCCGGATCGCCGTATACCGCCGGGTTTTCTCCCAACGTCAGGCCCGATGGCTCGGCTTCCCCAGTTAGAAGGGGAAGATAAAAGACTTTGATTC
989	2015-09-07	86	123.127906976744	155	NM_001011553	GGAGTCGAGCGAGAGCCTGTGGAGGAGTCCGCCTGCTGTAGCGTGCGTAAGCAAGGCAGCTACGCCGGGCGGCTACGCTGCGGAATCGGCGTAGGCGCCTTTGGAGAATCGGCGGGCTGCGCTCCGCTGGGGCTGGTCGCGGAGGGGGGGAGGGG
51371	POMP	650	74.404615384615	52	NM_015932	GGGGTCGACTGACGGTAACGGGGCAGAGAGGCTGTTCGCAGAGCTGCGGAAG
6392	SDHD	119;183;183	13.890756302521;11.825136612022;11.825136612022	9;8;8	NM_001276504;NM_003002;NM_001276503	AGGAACGAG;GGAACGAG;GGAACGAG
118924	FRA10AC1	67	134.462686567164	120	NM_145246	GGCGCACGGGACCTGTGCTGCAGCGGCTCTCTCAGGCCGTGGGTCGTCGCTGCAGCTGCCGGGAAAGAAGGAAACGACGACTCCGGGGGCGAACTTGGCACACAGGGAGGAAGGGAAAGG
5621	PRNP	234	157.320512820513	182	NM_001271561	GGCCCCGCGCGTCGCCTGTCCTCCGAGCCAGTCGCTGACAGCCGCGGCGCCGCGAGCTTCTCCTCTCCTCACGACCGAGGCAGAGCAGTCATTATGGCGAACCTTGGCTGCTGGATGCTGGTTCTCTTTGTGGCCACATGGAGTGACCTGGGCCTCTGCAAGAAGCGCCCGAAGCCTGGAGG
148223	C19orf25	315	56.4603174603175	55	NM_152482	GGAATCGGAAGTGGCTGCGTCGTCGACGCTGGGCTTTCGGGTCCCGCGCCCAGAG
5429	POLH	356	232.483146067416	234	NM_001291970	GCCGCTCTCGTCTGATCCCTGCTGGGGACGGTTGCCCGGGCAGGATCCTTTACGATCCCTTCTCGGTTTCTCCGTCGTCACAGGGAATAAATCTCGCTCGAAACTCACTGGACCGCTCCTAGAAAGGCGAAAAGATATTCAGGAGCCCTTCCATTTTCCTTCCAGTAGGCACCGAACCCAGCATTTTCGGCAACCGCTGCTGGCAGTTTTGCCAGGTGTTTGTTACCTTGAAAA
3192	HNRNPU	74	221.648648648649	238	NM_031844	GAGAGGACGTTGCGTGCTCGCTCGCGCCAGGCGAGTCTCCGCGTCTCCCTCGCGAACTCGGTGAAAGGAATTGGCGCCGTTCGACACCAGGCGGATCCGCTCTGCAGCACGAACCCATCTCCAGCCGCAGCCGCAGCCGCCGCCCGGGCCGAGGAGCAGCCGCAGCAGCCGCCACCAGTGGCCGAGTGAGCGGAGCCGAGTTTGAGGCAGCGCCTAGCGGTGAATCGGGGCCCTCACC
85313	PPIL4	180	21.733333333333	18	NM_139126	GGAGGAGGAGCGGGCGCC
221120	ALKBH3	191	388.942408376963	413	NM_139178	AAGGTTCCGATCACAGACTGCGGAGTGGGTCAGGGGCTGCGAGGGCTGCCCCAAGTCCTACCGGGTTTGCACGGGCGCGCCCGGCTCCGCCCGCAAGTGCGCCTTCCTGACTTACTGCTGGGTGCGCGGGGCTGGGGGTGCGAGTACCACCCCTGAAGTCTCTTCCTGGGCGACCTCCGGGGCCTCATTCTAGGCCTCCTTAAAGAGAAGGATCTAAATTAGGAAAAGGAAGTGCCCTTATCCACGACCAAGCTCTTCCACCTGCGGAGCTCGCTTAGTCTGCACCTCAACCGTGCGGAAAGTGACTGCCCTGTTTACTGAGGAAAAACTGGGGCTCAGAAAGATACCATGGAGTAGTTTGAAACAGGAACAAAATCTTCTGAAAGCTCGGAGCAGAAG…
405	ARNT	1314	76.056316590563	32	NM_001286036	GGGGTGGCGCGGCGGCGGTGGCATCTGCGGCC
63915	BLOC1S5	826	305.490314769976	308	NM_001199322	GGAACTGGTCGGGATGAGTGGCGGAGGGACAGAGACCCCTGTGGGTTGTGAGGCCGCCCCGGGCGGTGGCAGCAAGAAGAGGGACTCCCTGGGGACTGCGGGCTCAGCGCACCTCATTATCAAGGATCTTGGAGAAATTCATTCAAGGCTTTTGGATCACAGACCAGTTATTCAAGGTGAAACTCGTTATTTTGTAAAAGAATTTGAAAATGAAGACTAAACCATAGTTAAAGGCAGACAGTGTAATATCCAGTGGCTGTGTGTTCTGACGGTGAAGATGTAGTGTAACTATCAGAAAATAGAAGGAG
168374	ZNF92	617	513.959481361426	512	NM_001287533	GGGATTTGGCGGGGCCTTTGTCTCTCGCTGCAGCCGGCGCTCCACGTCTAGTCTTCACTGCTCTGCGTCCTGTGCTGATAAAGGCTCGCCGCTGTGACCCTGTTACCTGCAAGAACTTGGAGGTTCACAGCTAAGACGCCAGGACCCCCTGGAAGCCTAGAAATGGGACCACTGACATTTAGGGATGTGAAAATAGAATTCTCTCTAGAGGAATGGCAATGCCTGGACACTGCGCAGCGGAATTTATATAGAGATGTGATGTTAGAGAACTACAGAAACCTGGTCTTCCTTGGTATTGCTGTCTCTAAGCCAGACCTGATCACCTGGCTGGAGCAAGGAAAAGAGCCCTGGAATCTGAAGAGACATGAGATGGTAGACAAAACCCCAGACGGAGTCTTA…
7879	RAB7A	1989	197.154851684263	211	NM_004637	GGTGGCGGAAGTGGGAGCGGGCCTGGAGTCTTGGCCATAAAGCCTGAGGCGGCGGCAGCGGCGGAGTTGGCGGCTTGGAGAGCTCGGGAGAGTTCCCTGGAACCAGAACTTGGACCTTCTCGCTTCTGTCCTCCGTTTAGTCTCCTCCTCGGCGGGAGCCCTCGCGACGCGCCCGGCCCGGAGCCCCCAGCGCAGCGGCCGCGTTTGAAGG
23438	HARS2	127	347.244094488189	345	NM_001278732	GTTCCTGTCCCGGAAAGCCGGCGTCCTGCCGCGCGATGCCCCTGCTCGGACTTCTTCCCAGGAGGGCCTGGGCTTCGCTGCTCAGCCAGCTCCTGCGACCGCCCTGCGCTTCGTGCACCGGGGCGGTCCGTTGCCAAAGCCAGGGTGAAGAGTCTTTGCAGGTTGGTGGTCAACAGGGTCAGAGATGCCACAGGTCTGGCCAGTGTCCAGAGAAGCCACATCTCACATTCATTCTTCTGCCAGGTTGCAGAGGCAGTGTTAACATCCCAACTGAAAGCACATCAAGAGAAACCAAATTTTATTATCAAGACCCCAAAGGGTACCAGGGATCTTAGTCCTCAGCAT
80724	ACAD10	2716	181.415684830633	177	NM_025247	GAGGAGGTCGGAGCGGAAGGACGTCGTGGAGATTGCTTGCGCTGGGGTGCCACACTTAGGCTGAGCTGCAGGTTTTCGCACAGTCGCGAGTTAACCTCTGCTTGCTCCAGAGGCCTCGTCCTAATCCACCTCGGCTGACGGCGCGGGATCCCTGGCTCCGCGAGCCTCAGCCTCACC
728661	SLC35E2B	792	199.575757575758	300	NM_001290264	GCCCCAGTTGAGCCTTCGGATGAGGTCACAGCCCTGGTCCATGGTGTGACTGCAGCTTCAGGAGGGACCTTAAGCCAGAGGTGCCTGGCTAAGCTTCCCGCAGATTGCTGCCCCACAGGAGCCAACATCAAAAGCATTTGTTGTTTTGAGGTGCGTCTGCTTCTGCGCTTTGCCTGGGAGAGGCCCTGGTGGCCTCGTTCCTGGCGCCCGGAGTCCCTGCTGCGGCCCCACCCCCGGGCGGTCACGGTGACCCATGCTGCCCAGCCTGGAGGTAAAATCGTTCGTGGCTGTGGCTTCAGC
286676	ILDR1	619	130.239095315024	106	NM_001199799	CCGAGGGGTTCCTTGGAGAAGGTGGTGCGTCCTGGGGCGGCAGCTGAGGAAGAAAGACGCAGTGCCCCGAAGCCCCTGAGCTGAAAAGGGCCAGAAAGGGGGCGGC
84059	ADGRV1	54	136.611111111111	130	NM_032119	GAGGATGGAGCCCTCCTCCTGATCCTGTAGTGGTAGTAAGAATCAGCAGCGCGGGCAAGGAGTACGGACGGGAGTCAGAGGCAGAGCGAGGGTGTGTGGAGGGCCGGCGGGGACCGCCGGGAGCGCGCGG
3837	KPNB1	965	329.461139896373	326	NM_002265	CCCTCCCTGCGCGCCGCCTCTCACTCACAGCCTCCCTTCCTTCTTTCTCCCTCCGCCTCCCGAGCACCAGCGCGCTCTGAGCTGCCCCCAGGGTCCCTCCCCCGCCGCCAGCAGCCCATTTGGAGGGAGGAAGTAAGGGAAGAGGAGAGGAAGGGGAGCCGGACCGACTACCCAGACAGAGCCGGTGAATGGGTTTGTGGTGACCCCCGCCCCCCACCCCACCCTCCCTTCCCACCCGACCCCCAACCCCCATCCCCAGTTCGAGCCGCCGCCCGAAAGGCCGGGCCGTCGTCTTAGGAGGAGTCGCCGCCGCCGCCACCTCCGCC
162	AP1B1	14288	141.315299552072	152	NM_001127	GACAGCCGCGGGGCTCCGAGCCGCCGGCAGCCCGGACGCACCGGGAGAGCGAGAGGTGGAGGCCGCGGACATTTTGGTGCCAAGCCGAACCGAGCCGGGGCGCCGGGAGCTATTGGGACCTGCGGAAGCCTGGCTACAGATAAGGGACCAAA
255374	MBLAC1	63	149.428571428571	146	NM_203397	GCGGCGCCGCTTCGGCCGCCATATCTGGGTACACGGGAACCGCAGAGGACAAACTCTCACCCGCGTTTTCGATTTCTGCGCTTTCTTCGAGTGAGGCAAGACCTAGCAGAGGCCCAAGCCCGTCCCTCCCTGCCAGGAGCAGCCTC
8337	HIST2H2AA3	470210	52.1334531379596	52	NM_003516	GACTTTCCCGATCGCCAGGCAGGAGTTTCTCTCGGTGACTACTATCGCTGTC
22818	COPZ1	562	43.225978647687	33	NM_001271734	GCGGCTCCACGTCGGCACCAGCTGCGGGGCAAG
908	CCT6A	2937	60.672795369425	61	NM_001762	GGCCACGCCGCGCCGGCTCTGGGCACTCAGCATCGTTTCCTTTTCCTCCGCTGGAGCAGCT
6208	RPS14	1647;8936	30.624772313297;208.882609668756	37;198	NM_005617;NM_001025070	CTCTTTCCGGTGTGGAGTCTGGAGACGACGTGCAGAA;GCGACAATCGGGGGGCATCCTGCGGCGAGGGGACCCTGTGGGGCTTGGGACGAGAGACGGGGGTCTTTCCGTGGGAACCGAGCTAGGTGCCGGGCAAGAGACGCGCGGCTGGCCCACCTGGATCCTGGCCAACTCGGGATTGAGTTCGTTCCTGGTCTCAGAAGGCCCGTTTTGCTTTCAGGGAGGAGCTTGTGAAAA
81608	FIP1L1	620	189.975806451613	198	NM_030917	GCGCATGCGCAGACGGACCTGCGCTGGAGGCTTCATCTTTGCCGCCGCTGCCGTCGCCTTCCTGGGATTGGAGTCTCGAGCTTTCTTCGTTCGTTCGTCGGCGGGTTCGCGCCCTTCTCGCGCCTCGGGGCTGCGAGGCTGGGGAAGGGGTTGGAGGGGGCTGTTGATCGCCGCGTTTAAGTTGCGCTCGGGGCGGCC
7385	UQCRC2	2528	73.631724683544	77	NM_003366	GGGAAACTCCCGGCCTCCGCCACCATCTTGCTTTCCTTTAATCCGGCAGTGACCGTGTGTCAGAACAATCTTGAATC
55975	KLHL7	69	246.913043478261	242	NM_001031710	GGGTTCTGCCCGGGGACGCAGCCCAGTTGGTAGCGTCGCTCCCTGAGCGTTTCTAAGGGGGCCGCCCGGCCTTGTCTTTCGGCAGTGGCCGAGCCACCGCCGCCTGCCGCGCGTTCCAGAGCTGGGCGCTGCAGCTGCACTGCCGATCGCCGTGTTTGGTCGATAGAATCCCCAGTGTGCCCAGAGAGTGCGACCCCTCGCCCGGCCCGGCGAGCCCCGGGCGTGAACCGAGCTGAGGGAGG
6778	STAT6	476	465.224789915966	465	NM_001178080	GCCGGAAACAGCGGGCTGGGGCAGCCACTGCTTACACTGAAGAGGGAGGACGGGAGAGGAGTGTGTGTGTGTGTGTGTGTGTGTGTGTGTATGTATGTGTGTGCTTTATCTTATTTTTCTTTTTGGTGGTGGTGGTGGAAGGGGGGAGGTGCTAGCAGGGCCAGCCTTGAACTCGCTGGACAGAGCTACAGACCTATGGGGCCTGGAAGTGCCCGCTGAGAAAGGGAGAAGACAGCAGAGGGGTTGCCGAGGGAGTTCCTGGTCGGCTCCGACGCCTTCTGCTGCAACTTGGCTAGTGCCCTACTTTCAGACACTGTCCAGCACCTTCAGGCCTCGGTGGGAGAGCAGGGGGAGGGGAGCACCATCTTGCAACACATCAGCACCCTTGAGAGCATATAT…
5792	PTPRF	135	228.481481481481	219	NM_130440	GGGACCAGGTGGAGGCGGCGGCGGCAGAGGAGTGGGAGCAGCGGCCCTAGCGGCTTGCGGGGGGACATGCGGACCGACGGCCCCTGGATAGGCGGAAGGAGTGGAGGCCCTGGTGCCCGGCCCTTGGTGCTGAGTATCCAGCAAGAGTGACCGGGGTGAAGAAGCAAAGACTCGGTTGATTGTCCTGGGCTGTGGCTGGCTGTGGAGCTAGAGCCCTGG
8544	PIR	3281	211.519658640658	218	NM_003662	GCCGGCCGCGAAGCGCTGAGTCACGGTGAGGCTACTGGACCCACACTCTCTTAACCTGCCCTCCCTGCACTCGCTCCCGGCGGCTCTTCGCGTCACCCCCGCCGCTAAGGCTCCAGGTGCCGCTACCGCAGCGTGAGTACCTGGGGCTCCTGCAGGGGTCCACTAGCCCTCCATCCTCTACAGCTCAGCATCAGAACACTCTCTTTTTAGACTCCGAT
11322	TMC6	162	155.537037037037	156	NM_007267	AGGTTGAGTAGCAGCAGGAAGCGGAGGAAGGTGAAGTAGGACCGAATTCCTGTGCCGAAGAGGCCTGCAGTGGGAGAGCAGGATGGGGGCTCCGGAGGTGGCGCCCAGGCTCTGAGCTACCCTAGGTCTGCAGACTAGCGGGCATTGGCCAGAGAC
57763	ANKRA2	259	626.374517374517	656	NM_023039	GGGGCGATCTGGAGTAGGAGGTGTGACCGGAGGGCGAAATTGGGGCTTCCTCTGCTCTGGTGACCCAGAACCGTCAACTGAAATGACCCTGTCTGTGTAGTACTCCGGCAGGATGGGCCTCGGAGCGTAAAGGCGGCAAAAACAAAAATATTAAAAAAAAGGAGAGAGGGACAAAAAAAAGAAAACCCGAAAGTTTCAGCTGCATTGCTGCGGAACGTTTTTTAGCCAGAAGGCGAAAGAAGAAATCGGAAGTGACGTCGCGGCCAAAACAAGCCCGGGCTTGGAGGCCTGTACTGAAGCTGGCCTCAGATGGGAAGGCCCGACTCGCTGTCTGCTGTCGTCGGTGGTCGCGAGACCTTGCACTCTCACCGGGTCGGCCTCCAGCCCCTGTGCCCGGGA…
79170	PRR15L	3364	238.663495838288	251	NM_024320	GACTCCAGGAGCTGCAGCAGAGCAGGTAACAGCTCTTGCACCTGTTTCTCTTGCACCTGACGTGCAGCTGCTCCTACCCACCTCTCCTGGCTGAGCCTTGCCTGATACAGCAGCCCGGAGGCACCACTTGCTTCCCGAGTCTCACCCTCCCAGGCAGCTCCTACACTCAACTGCTTCTCTAGGAAAGGTCTCACCTCCAGCCTGGAGCAGTCGGGATTACAGAAAGCCCCATCCTTGGCTTAGGGAGCGCC
57415	C3orf14	1083	311.182825484765	335	NM_020685	GGTGCCTTCCCGGAAGGGCTCAGAGGCGGGCTCGGTGAGTGGAGTCGGACAGTGGGTGGGTGCCCTGACTGCCTGACGGCCGCGCAGGGCCTTGCAGGACCGCTGGGGAGGATGTTGTTAACGTAAAGAGCCAGGCTGATGAGGAAGGTTCATGAGTCCTTTGGGTATAAGCGGGAGTTGGGGCGGCCGGAGGGCAGATGACTCTGAGAAGGGCAAGCACTTTAACCTTTTAAGCCCAACCAGATGAGTTGCCTGCAGTTTTGGAGGCCTTCAGAGCATTTCACTAGACCTCTGTCTGTGTCGGTCCAGTGTCTTTAGCCAAGCTTTGATTAAAG
51460	SFMBT1	189	292.767195767196	292	NM_016329	GAACCCAGCAGGAAGGAGGGCGCGAGCGGGCGAGCGCGGGCAGCACGGGAGGAAAAAGCTTCCGCGCGGGGGAGCGAAAAGACGGAAAGAAAGAAAGAAAACGAGCGCGAGAGGGGGAAAAGCGAGCGATCGAGCGAGCGCGCGCGCGAAAACTCCGGGCAGCACTTTCATTTGGACCCGTGGATACCCATTGAACAGATGCTTGAAACCTGCAAGTAATCTTCAGATCCTAGCAGAACCATAGGCCTTTCCTTTGTTTTGGGAGGATATAGCCTGCCTATATGCTGTGGAA
26586	CKAP2	898	85.907572383074	72	NM_001286687	GCGGCGGCGGTGGTCTGAGGAAGTTCTATCTTGGCGCTAAAGCGGAGACGCATCCCCCGACCCGAGGCTACG
54934	KANSL2	982	53.672097759674	53	NM_017822	AGGGCGAGCGGCGCGGCAGAGTGCGGCGCAGCGCAGCTCCTGAGGTTTTGGTT
84289	ING5	1188	27.0025252525252	26	NM_032329	GACCCCGAGCGCGGCCGCGGACGAAG
54511	HMGCLL1	217	85.248847926267	90	NM_001287741	CCCGAGCTGGCGCAGTTTCCCAGCGCGGTGCCCGCCCCTCATCCTCCTCCAGTCTCCCTCCCCTCGCCGACTGCCGCCCCAGGCTCCGCC
201299	RDM1	99	18.535353535354	25	NM_145654	GCCGCGCAGGTGCGGTGAAGGGAGG
9045	RPL14	2696	151.553412462908	188	NM_001034996	ACCGCAGGGGCGGTGCGTTCTTCTACACATGCGCAGGGTTGGGCGGGTCTTCTTCCTTCTCGCCTAACGCCGCCAACATGGTGAGTCTTACTGTTGCGGGCTCCGGGGCCGTCGACCATGCCGCTCGACCTCCACCTCCGCTGGGAAGCTGAGGCGCCAAACGGCTCCCAGAGGGTCCCGGGAAGCGC
4000	LMNA	216;216;216;216	200.791666666667;200.791666666667;200.791666666667;200.791666666667	208;208;208;208	NM_170708;NM_005572;NM_170707;NM_001282626	AGTGTTCGCGGGAGCGCCGCACCTACACCAGCCAACCCAGATCCCGAGGTCCGACAGCGCCCGGCCCAGATCCCCACGCCTGCCAGGAGCAAGCCGAGAGCCAGCCGGCCGGCGCACTCCGACTCCGAGCAGTCTCTGTCCTTCGACCCGAGCCCCGCGCCCTTTCCGGGACCCCTGCCCCGCGGGCAGCGCTGCCAACCTGCCGGCC;AGTGTTCGCGGGAGCGCCGCACCTACACCAGCCAACCCAGATCCCGAGGTCCGACAGCGCCCGGCCCAGATCCCCACGCCTGCCAGGAGCAAGCCGAGAGCCAGCCGGCCGGCGCACTCCGACTCCGAGCAGTCTCTGTCCTTCGACCCGAGCCCCGCGCCCTTTCCGGGACCCCTGCCCCGCGGGCAGC…
10124	ARL4A	275;66	185.178181818182;204.621212121212	185;196	NM_005738;NM_001037164	AGAGCTGCTTGGAGAGCTAAGCTGGAAGGGTGCTTATCCCTGCGTAGAAACGCCTGCCAATGCTTTCTCATTTGGACCCAGACTCCAGATCGGGAGCAGTCTTATAGCTGGATCAGCTACCAAGAGAAGTTGTAAACCAAGAAGAGAAAAGCATTTCAATTTGGGACATTTATTTGCACCTGGAA;CTCTGCCATCGCCCACGCCTCCCTGGTGCCAGGGAACAGGTATCAGCGCGCCTCCCCAGCGGCTGGGAGAGACGCTGAATGAAGAAGAGGGAAGGACGGTTAGTCAGCAGTCTTATAGCTGGATCAGCTACCAAGAGAAGTTGTAAACCAAGAAGAGAAAAGCATTTCAATTTGGGACATTTATTTGCACCTGGAA
2029	ENSA	37772;37772;37772;431;431	123.233268029228;123.233268029228;123.233268029228;34.4106728538283;34.4106728538283	117;117;117;31;31	NM_207168;NM_207042;NM_004436;NM_207045;NM_207047	GAGCAACCCTAGTGACAGGAGCCGAAGCAGCAGCGCAGGTTGTCCCCGTTTCCCCTCCCCCTTCCCTTCTCCGGTTGCCTTCCCGGGCCCCTTACACTCCACAGTCCCGGTCCCGCC;GAGCAACCCTAGTGACAGGAGCCGAAGCAGCAGCGCAGGTTGTCCCCGTTTCCCCTCCCCCTTCCCTTCTCCGGTTGCCTTCCCGGGCCCCTTACACTCCACAGTCCCGGTCCCGCC;GAGCAACCCTAGTGACAGGAGCCGAAGCAGCAGCGCAGGTTGTCCCCGTTTCCCCTCCCCCTTCCCTTCTCCGGTTGCCTTCCCGGGCCCCTTACACTCCACAGTCCCGGTCCCGCC;GGTGGTTGGAAAGACGGTGAATGGAAAGGGG;GGTGGTTGGAAAG…
197259	MLKL	663	393.909502262443	462	NM_152649	GGCCGTGGCTCCGAGCTGCCTAGAAAGCGGCTCCAGGGAGCCAGGGCACCGTGAGCCTGGTGGTTGGCAGCTGGAGCCACGTCGGAGGGGGAAGTGTCGCAGCATTCTCTGCAGGCATCACAGACCTGAGGCAGTGGCCTCCGGAGGGCACTGGACAGAAACAGCCATCCAAGTGGCTGAGTGGAGGGACCCTGCTCAAGTGCAGCTGCAGTGGCCGGGGTTTCCCTCAGGTAGGGATCGGGGCGCCTTGTCGCCGCCAGCCACGTGTGGCGTCCGGTACAGTCAGCAGAGTGCAGGGTGCGGGCACCAGGAAAGGGGGCGCAGGGGAACTCCCGCGGGCCTCGCGTTTGCAAACTTCTCGCCTGGGCAGGAGGCGGTCGTGGGAAAGAAGGTGGAAGA…
28986	MAGEH1	648	221.541666666667	227	NM_014061	GGGCTTGCAGCTGCGGCAAGTGCTGGCGGCGGCTGCTCGCGCAAGTCAGCTGGCGTGGGAACTACCCTTTGTAGCTGAGAACGGCTTGTTTATTGCTACAAAGACTCTATTGACATTGGTAGCTTCAGCGGCAGCAGCTTCTTACGGTATAAAGCTGTTGCTTCCTGAAGAGGCTACAAGCATCCTTCCCTAGGACTGCTGTAAGCTTTGAGCCTCTAGCAGGAGAC
3052	HCCS	1532	221.799608355091	217	NM_005333	GAGTGAGAGGAAGGCGGCGGCGGCGGCGGCGGCGGCGTGAAGTCACTGCTGCTCTGGGTTCGGGTTGGCGACTGAAGGCGGTACCGGCCTCCCGGAACAGCCCGGGGGAGGGCTTAGGTGCAGAAGGGCAGGCTGGCCGCGGCCGGTTTGGTCTGGGGACCACGGGCTGGAGCAGGTGGAAATTTAAAATTGTTTACAGTCAACACTGTTTCCAGCC
284306	ZNF547	220	145.95	144	NM_173631	ACAGGCACAACTGACAGTGGCAGAAGCTCAGCTGACAAGGACTGGGGACGGCGGTGTCCTTGTCTTGCCTTTGTCGCCCCCGCCCCTCTCTTCCCTGGCTGGACTTGCGGAGTCCCCGCCGAAGAACCCGAGGGTCCCCTGGCG
29928	TIMM22	1163	18.5812553740327	25	NM_013337	GAGGGTTGCTTGGGCAGCGACTGTC
54502	RBM47	1054	484.482922201139	345	NM_001098634	GACGAGAAGATGTTGTAGGTGACTTCCTAGCTGTGTTAAGTTGCTCCTGGGCTGTGAATGGTGTTAATTTCTGAAGTGGGCGGCTCCAAAAACTTAACAAGGAAAGCTCAGGTAACGGAGGCCTTGGAAAGAGACTCTGCGTCAGGTCACCCAGCAGAGATCAGCAATCCTTGGCTCACTGAGGAGGTTTGGATTTGCCTCAAAGGGCACTGCAAAAATTGAACAGAGGAATCCCAAGGAAGCTGCCTGAATTTGCCTGTATACTCTCGTTCTGCGACTTATAAAGGACCAGACAAATCAAATTAGTGGTTTTGGTTTCCGCCAGCTGTGGATGCCTTTGACATT
8260	NAA10	423	81	75	NM_001256119	GGCGTCGCTTCGGAGCGCGGCGGCAGCTGACTGCGCCTTCACGATCCGCTGGGACCCGCGAGCCCCGCCGCCGTT
9584	RBM39	7733	301.348118453382	294	NM_184234	GCCATTTCAGGGAGCTTGTCGACGCTGTCGCAGGGGTGGATCCTGAGCTGCCGAAGCCGCCGTCCTGCTCTCCCGCGTGGGCTTCTCTAATTCCATTGTTTTTTTTAGATTCTCTCGGGCCTAGCCGTCCTTGGAACCCGATATTCGGGCTGGGCGGTTCCGCGGCCTGGGCCTAGGGGCTTAACAGTAGCAACAGAAGCGGCGGCGGCGGCAGCAGCAGCAGCAGCAGCAGCAATCTCTTCCCGAACACGAGCACCACAGGCGCCCGAAGGCCGGAACAGGCGTTTAGAGAAA
55957	LIN37	237	155.949367088608	170	NM_019104	GCCCACAGAAGGGTGGTGGCCACGGTCCAGGCTGGACACAACCAAAGGCGGAGGACCCGTGGCCCACGAAGCTCATCTTTGAACTGTCCCCGCCTTCTCCCGCCTTGACTTGTGACCCTAGGCCCTTTGGGGCGCCTCTGACCCAGCTAGCCAGATCCCGGACCCAAACC
404734	ANKHD1-EIF4EBP3	93	140.720430107527	135	NM_020690	AGTGAGAAGTTAGTGGCGCTGCTGGGACGGGGGAAAGGAGACGCTTCTTCCTCTTGCTGCTCTTCTCGTTCCCGAGATCAGCGGCGGCGGTGACCGCGAGTGGGTCGGCACCGTCTCCGGCTCCGGGTGCGAACA
5019	OXCT1	135	136.503703703704	140	NM_000436	GGCGTGCGGCTCGAAAGGCCGGGAGGACGTCATCGACGCGCTGTCGAGCCTCCAGCCCGCCCGGGTTTCCTTCGCAGTCGCGCACCGACGCTCAAACGCGCGCTCCAACCCGCAGCCTCCTCCTGCCTCACCGCCCGAAG
440515	ZNF506	582	142.840206185567	144	NM_001099269	GTCTCTCGCTGACGCCAGAGATCCAGCTATCGTCTTCACTGCTCTGTGCCGTCAGCTCCTAGAGGCCCAGCCTCTGTGGCCCTGTGACCTGCAGGTATTAGGAGGGTCACAGCTAGGACGCCGGGACCCCCTGGAAGCCTAGAA
5467	PPARD	854	294.401639344262	295	NM_001171820	GCTGCGGCCGCCGCGGACCTGGGGATTAATGGGAAAAGTTTTGGCAGGAGCGGGAGAATTCTGCGGAGCCTGCGGGACGGCGGCGGTGGCGCCGTAGGCAGCCGGGACAGTGTTGTACAGTGTTTTGGGCATGCACGTGATACTCACACAGTGGCTTCTGCTCACCAACAGATGAAGACAGATGCACCAACGAGGCTGATGGGAACCACCCTGTAGAGGTCCATCTGCGTTCAGACCCAGACGATGCCAGAGCTATGACTGGGCCTGCAGGTGTGGCGCCGAGGGGAGATCAGCC
55041	PLEKHB2	1025	76.607804878049	61	NM_001267065	GAGCAGGCGAGGAATCGCCGTGGCGTCTTGGTGTTCTCCACGCTGGTTCGCAGGTGAAGAG
50813	COPS7A	399	280.924812030075	282	NM_001164095	GCGGAAGTACGGCCGGAAGCCCGCCATAGAGTTTAGTGGCCAGAGCGACTCTTCAGGGAGGTGGCAGGAAAGGCTTGGAACAGCTGCCGGAGGTGACGGAGCGGCGGCCCCGCCCGGTGCGCTGGAGGTCGAAGCTTCCAGGTAGCGGCCCGCAGAGCCTGACCCAGGGTACGACGAAGCAGTCGGCGGGAGCCCACGGTCGCTGGGCGGTGTCTTTAAGGGAGGGGGCGGAGCCACGTCTCTGGACATCCTGAGCCCAAGTCCCCCACACTCAGTGCAGTG
9632	SEC24C	1929	173.819595645412	190	NM_004922	GGCCCCCTCGGAACCGGAAGTGGAGCCTGGGAGCCTTGACGTTAGGAACGAAGTCTAACCTGGATCTGGAGCCGGGAGATAATCTGAATGCTGGCTGGGGCAGAAAATTACTAAGATCCTGTGGAAGTGTGAGGATTATTAAACTGATCACTGTCTGATAAGGTGAGATCAAATTGGGAATGCTTTCATA
6567	SLC16A2	92	153.032608695652	178	NM_006517	GGGCTCGAGGGACCGTCTGTCGCGGGACGGGCTGGCCAGCTGGGGCGCGGAGCCTGGAGGAGGAGGCAGCGGCAGCGGCAGCAGCAGCCCTCCGAGCAGCAGCAGCTGCAGCAGCAGAAACAAGTACCAGCCACAAAGCGGCTCCTCTGGCCCAAGCAGCCACAGTCCCCCCGCCGCG
60343	FAM3A	414	459.176328502415	476	NM_001282311	GTCCTCTCCCGGGGCGGAGCGGGTCGGCGGGCCTGACAGGGAACCTCCCTGACCGAGCCCACGTCTCCCCACGGCCAGAGAAATCTCCGGCCCGGCCCGCATCGCCAGCCCCCAGGCCCGGAGGAACGGCCCGAGCCCAGGAGAACCACATCTTCGTCCCAGCCCCGGAGGCTCCTGTGGGCAAGATCGTGAGCCAACGGGTTCCTGAGGCCCCTCCTGGCCAGGCAGGGTTTCCCCGCGCGTTTCCGAGGAGCCCTGCCTGGCCGGGCGGCTGGACAAACAGGTCGTAGCACCGATCGCGCCCGCCCCCAGCAGGGGTCCCGCACAGGCTTGCCCCTGACCCCCACCCAAACCTGTCCTTCCGCTTTGCCCCCAAACAGTGCACTTGCCGGCGGTCCC…
10137	RBM12	2437;2437;2437	253.544521953221;221.544521953221;168.544521953221	255;223;170	NM_006047;NM_152838;NM_001198840	GACGGCCATTTTGTGAAGCGGCGAAGGAGGTGGTGGCTGCGTTGGGCTCCGGGAAGCCGTTCGGGCTGGGGCTGTCGGCCGCGGGGCGGAGGCACTCGCGCGGGGGGTAATTCGGGGTCTGGGTTCTGGTGCCGCGCAGCTTTCCCCGTCTAAAAGTTGGTTTTAATTGGTTGCCCACAGGATTGACTTGGCCTCTACTTCTTGTTAAGGAAATTCATCTCTTGTTTTATCAGGTGTGTGTGGTTTCAGCGCAGC;GACGGCCATTTTGTGAAGCGGCGAAGGAGGTGGTGGCTGCGTTGGGCTCCGGGAAGCCGTTCGGGCTGGGGCTGTCGGCCGCGGGGCGGAGGCACTCGCGCGGGGGGTAATTCGGGGTCTGGGTTCTGGTGCCGCGCAGCTTT…
1385	CREB1	1625	187.611692307692	191	NM_004379	GCGGCTCCTCAGTCGGCGGCGGCTGCTGCTGCCTGTGGCCCGGGCGGCTGGGAGAAGCGGAGTGTTGGTGAGTGACGCGGCGGAGGTGTAGTTTGACGCGGTGTGTTACGTGGGGGAGAGAATAAAACTCCAGCGAGATCCGGGCCGTGAACGAAAGCAGTGACGGAGGAGCTTGTACCACCGGTAACTAA
92342	METTL18	796	307.032663316583	316	NM_033418	AGCCCCTGGAGGACTCGACTCACTGGTGCGCGATTTAGGTCCGGAGGAGGCGTTGTGAGGTGAGCTTTTTCAGAAGCGCGATCCCAGGACACGTCGGGAAGCAAGCATCCCCAGAGCTGCTTGGAAAGAGGACCAAAGACGTCTAAAAAGTCATTTGGAAATATCTCTAAATATTTGTTACCATGTATAAGCTGCTAAAGAGAAATTGGGCCCAACAAAACTAATTGAATAATTGAGGCAGATTTGTGTGTATCATCAAATTCTATCCAGAAGTTGAAGAATCTGAATTTAAAGATTGTGTGCATTTAATAAGAGG
6199	RPS6KB2	3491	25.506445144658	26	NM_003952	GACGGGCCCGCGGGGCCGGCGCCGCC
11104	KATNA1	492	219.211382113821	220	NM_001204076	GGCGGGTTTGTCTTCAAATTCTCGGCGAGCAGGAGCCGCGCCGGCAGGTGGTGTTGACGATTGAACTGGGCAGTACTGGGGCCGTGAGCGGAGAGCAAAGTGGGCTGGACTGGGTCAGGCCCTCCTTCCTCGCTGCCGGGATCTCCACTCCGCCAATCCCCTGTGCCTGGCGTTGGGCGGTTTCCCGAGGAGCTTGGGCCGCCGCAGCTTACAGTTGAAC
6668	SP2	4548	39.773966578716	40	NM_003110	GGCGGCGGAGGCGGCGGAGGCCAGGGAGGAAGATGTCGTA
80314	EPC1	384;1492	194.09375;244.981903485255	195;206	NM_001272019;NM_025209	GTATTGAAGAGAGCGAGCGAGAGAGGAGCGGAGCGGCACAGCCTCCCACCCTCCCGGCTGGTGTTAGTGCCCGGACGGCGGGCTCTGCGCTCCGCCCCTCAAGTCCCCGGCAGCGGTTGGCGAGTGGGGACCGAACCCCCGGTTCTCCATGATCCCGCTGGCCGGGGCCGTTTCCCCAGAGCGGAGAGGGATAAT;GTATTGAAGAGAGCGAGCGAGAGAGGAGCGGAGCGGCACAGCCTCCCACCCTCCCGGCTGGTGTTAGTGCCCGGACGGCGGGCTCTGCGCTCCGCCCCTCAAGTCCCCGGCAGCGGTTGGCGAGTGGGGACCGAACCCCCGGTTCTCCATGATCCCGCTGGCCGGGGCCGTTTCCCCAGAGCGGAGAGGTATCTGCTGCGCCT…
113230	LOC113230	70	101	101	NM_001291291	CAGGCCCTAAGACCTCCTCCTCCAGGTCAGGCTCGGAAGCCCCCCACCTGCGTTTTCCGCCGTGCCCCGAGGCTCCCCAGCGTCCCCCGGAGGAGCGGTTC
64081	PBLD	61	110.245901639344	43	NM_001033083	TACCAGCAATTTTGAGAACTTGCAAAAACAGCTTGCAAGGAAA
284161	GDPD1	351	39.57264957265	37	NM_182569	GGCCCGGAGGTGGGAGACTTCCCACACGGTGACTGAG
8816	DCAF5	811	152.035758323058	264	NM_001284206	GCGGAAGCGCGGCGGCAGCTGAGGATCAGCTGCTGGAGGAGGCGGAGAGGCAGAGGGAGGAGCCTCGGGGGGAAGGAGAGGGAGGGGACCGTCAGGAAGCCGCGAACGCCGCCGAGTGTCTGCACACCTCGCTCTGCCTGCCATGGCTGGTTAAAGAACCATCCGGATCGCAGCGCGGGGGGAGGGCCGGGTGGGGGGAGCAGCGGCCGCGCGTGAGGCCGAGGGAGGGGCGGCGGCGCGAGCGGCGGCGGCGGCGGTTCCAGC
23339	VPS39	1288	148.087732919255	151	NM_015289	GGGGTTGACGATGGCTGTGTTGTTGAAGGGCCTGTAGCCGGGGGGTTCCTGGCCGGATCCCGGTCTACCCTTAGCCCAGACTCGTTCCGGACCCCAGCCCGGCCCGGAACACTCTGGGCGAGACGGCGGTGGCAACTCTCCCCTTGCCGCC
10420	TESK2	107	371.271028037383	393	NM_007170	GCGGCCCGGGAGCTCAGCAGAGCTACCAGCTGCCCTGTTGGCTTCGCTGGTCGGATCGTCCTCCTGGCCCCGCCAAACAGGCGGGGGGAGCGGCCCCGACTGTGGGGCCATGGCAGTAGTCTCCTCGTTCGCCGCCGCCGCTAGCCTAGCTGAGTCGCCGGCTTCTGCGCTAGGGGCTCCCACCGCCTCCGCAGGCTAAGGAGCCGCTGCCACCAACGAGCTGTGAGGGTTACTATGCTCCCTCTTTGCCGCCGTCTCCTCCTCTTGCCCGCGCAGGCACCCCTCTGGCTGCTCAGTCCTGCCTCAGTGTCAAACCAGAAGAGAAGTAAAATTCAACAAAAATTTATGTGTGGAGTTCCTTCTTAAAAGAAGAAAAAAGTGATTATTTAGACT
171546	SPTSSA	2075	41.4448192771084	33	NM_138288	AGACTGACGTGTGAGCTGCATCGCGGGAGGCGC
6161	RPL32	195201	46.879355126254	53	NM_000994	CTCTCTTCCTCGGCGCTGCCTACGGAGGTGGCAGCCATCTCCTTCTCGGCATC
65080	MRPL44	331	17.175226586103	10	NM_022915	CTCTCGTGCA
26061	HACL1	820	215.808536585366	360	NM_001284415	CAGCTGGCCGACTCGGAGACAATGGCGAGAGGCCTCAGAGTTCGGCTTCTTACCTGCTTTGCATAGGCAGCAATCTCCTGCTAGTCCCGCCTCCCTCTGGCATTCTGGCGCGCGAATGGAGGAGCCGAGAAGAGAGCGCAGTTCTGATTGGAGAACGCGCGTGTTTACATTCTCACCTCTCCCGGGAAGTGGACGAATTTAGACCGCCTCTTCCTTCCCGTTGTTTAAGGCAGTTGGTTGCCCTCCTGTCCGTCAGAGGTGCAGTACCAGAGGTGGCGTGCTGCCGATTTCGCGTTTGCCTTGCTGGATGATTCCGCTTGTTTGCCGGCTGCGTGAGTGCTTAGAGCTTTTCGGTGGAAG
132949	AASDH	312	168.115384615385	170	NM_001286668	ACGGCTTCTGGGAGCTGCTGCTTCGCTGTGAGAAGTATCCGCGACGAGCTATCCGGGAAAGGGCCGAATGCGATCAAACCTAATCCGCGAGACTTGCTAAAATTCTCCAAGTCCCGGCTGCTTATGTACCTATCGAGCCAGATTCACCACCGTCATTATCAACTCATTTT
22796	COG2	141	103.624113475177	100	NM_007357	GCCGTGGAAACTGGCGGTGGCCGCGGCCGCCGAGTCGGTCTGCGCAGCCTCCTGCGTTTTCTCGCTTGGATCTTGGCACTGAGAGGCGGTGGCCGGCGGG
55972	SLC25A40	994	317.813883299799	364	NM_018843	GCCGCCGTCCTTCTCGCGCCTCGCTCTGGCCCTGCAGGTTGTGTTTCCGCCTCTACCCCGCCTCCATTCCGTTGCTCTCTCAGTCTCAGACCCGGGCTCTCGGTCCGCCGCTTCAGGTCTTGGCGCAGCCTCAGAGAGTTGGCGCGGCTCTGTGTTGACCAAACCTAGTGGATGCAGTTAGCGCCGGAGCCCGGCCCCGCCCGTCACCAGGGTTATTCCCGCCTTCTAGGTTTGCCAGGACTGCCGGCCCTGCAGCTGCCTTCTGCCCCAGGTTTTTGGCTACTGATGTTACAAACAATAAAATATTGGAGCATAGAGTTGAAGAACAGACTCAAACCAGGTTTTTATTTAATTAGTTAAAAAT
29926	GMPPA	2555	380.422309197652	384	NM_205847	GCGGAAGGAGCTTGCAGTAGCGGGCGGCAGAGCTGGAGTGAAGGGAGCTAGTGGTAAAGGGAGCTGGTGGAGGGGTGGCGGCAGGGGTAAGGGGCAGGGGACACCCTCTAGACGGAGAGCGGGCTCCGAGGTCCTGGCTGGCCCTCGGTGCGCCCGCCCCTGTGTTGGTCCCACAATCCCTGGCAATGAGAGGCCAGGGTTTATTGGACAGAGTCAGTTGTGGGGTTCAGAGGGTCAGCAATCAATCAATCCTCCGAATCCAGAGATTTAGACCCAGTCGTCCGTATTAGGACTGGAGGGGGGTCAATAGGTTCAGTGTTTGAGATGCCAAGGGAACCTGTCTTTTGATTTGGGGTTCAACATACAGAGGTAGCAGTCACCATT
4814	NINJ1	384	41.575520833333	40	NM_004148	GCGCTCAGGCCCGGATCCTGGCGGCCTGGGCGGCCGCACC
51292	GMPR2	1243	476.188254223652	610	NM_001283021	GACGTCGTAAATTGGAATGAGGCATCCAGTTTAGCAACAGCAGAGATGACGACTCTGCGATTCTGAGAGTCCCTGGCGAGCCCGGGCTAGCGAAAAGTGGGGGCAGAACGAACTACATCTCCCATCGTGCCAGGAGGCGGTCCCGCCCGTTTCCCCCTGGGAGTTGTAGTCTAACCCCCTCGGATCCAACAGCAACCTCAGTGCGTGAACTCTGTTATCCAGAAGGCCTCGCCCTGCCGCCGCCGAAGCTGGAATTCGTCGGCTAGTAGTTCTCGCCGGCAACTAGAGGAACCTGTTGGCGTGGCCCAGAAGGCTTAGCGGGATTGCACGAGCCCTCAGATTCATCGCTACCCCGAGGCTAAGCGCCATGCCTCATATTGACAACGATGTGAAACTGGA…
2130	EWSR1	7875	36.824126984127	18	NM_001163287	GAGGAGGAAGGAGAGAAA
78996	C7orf49	677	432.41211225997	451	NM_001243749	GGCCAGTGGAGGTCCGCAGAGTTTGGGCGCCAGGCGAGACGGCAGGGCTTAAAGTTCCGGGTGAGGCGTGGGTCCCACAACCGCTTGGAATTTGCCTCCCGGCTCCGCTCTGGAAGCTAAGAAGGGGCACGAGAGCCGGAGACGGGAACCTGAGAGCAGGGAAGCCAGTAGCCGGCCGGAGGAGCGCGCGGCCGCTCCAGTCGGAAGGAGCCGTTGCAGCCCTGCCCGGCGTGTGGCGGGGTCAGCGAGGCCCCTGCGGTGCTTCGCCCGCGCCTTCCGCTCCGCACTCACCCGCCCTCTGGGCCTCCCACAGGAATCAAAGATCAACTCCCACTGAGGACAAATGGACCTGTAATTCCGGGTGTGACGAGAGAACGAGATTTACCTTCCTGAATTAAA…
84916	CIRH1A	690	76.0057971014493	72	NM_032830	GAGAGCGCGCGCGCACGTGGGGCCGGGGCGGAGAGAGGCGAGCACCGGGAAGGGGAGCGTGGGGCCGCTGGA
100529241	HSPE1-MOB4	9703	97.416469133258	56	NM_001202485	GAGTCTCTTTGCGGCGCTACACTAGAGCAGAGTACGAGTCTGAGGCGGAGGGAGTA
9766	SUSD6	62	194.274193548387	198.5	NM_014734	AGCGAGCTAGACAAGGGCACGCGGGGCCTCGCCTAGACCCGAGAAGACTGCGGGCGCGCGCAAGCGGCGGCGTGGAAGCTGTGAGCGCCCCCATCCCGGAGGTCTCCGCCGGCTCCCGGGTGAATCAGCTCCCGGCCGACTTTAGGATTCTTCTGGATTTTAAATTTTTTCTTTTTAAAAAAACTTGGACGGATAAAAG
23705	CADM1	196	20.127551020408	21	NM_001301044	AGTCTGAGGCAGGTGCCCGAC
84240	ZCCHC9	371;319	463.053908355795;78	463;78	NM_032280;NM_001131036	ACCGCAGGAGGGCGGTCTTCCCCGGCTCGCCAACTCGGCTGCTCTGGGGGATTCGTGCGCGGTAAGAAGCTGCGCGGTAGCGCGGTGAGGTGAGGTTCTCAGCCACCAAAGCTGCAGGGTCTCGTCGTTCGTTCCCTCTGGCCTGGCGGAACTTGCGTGGGAAGCTGGGAGGACAGAAGGCTTAGCCGCTGGGTCCCTGAGCTGGCTGGAGCGCGGGCTGTCTAGGGGCGGCGACCTCAGCTGTTGGGCTCCGGCTGCTGGGGGCTGTGCGTCCAGCCGCCCTGGAATCCGCCTGTGGGTGGGCCGCTTGGCTCTCCCACTTCACCCTCTTGATAACCCAGAGCCTCCCCCTTCCCACGTACGTAGGGGAAGGATAATCTACTTCCTTTTGAACAGCTT…
54960	GEMIN8	399	163.340852130326	166	NM_001042480	ACCGGAAGCGCGCTTCCAGTCGCCCCGGCAACAGCCGCCTCCCTCGCGTCCCCCACTCCCCCTCTGTCTCTCCAAGGAAAACTAGGCCCCTGCGCGGCCAACGCCCAGGATCCGCAAGCTGCGCGCCCACGAGTTTCAGCACCCATTTGGACTTTCACAATCAGAG
80818	ZNF436	78	258.666666666667	335	NM_030634	GGGCTGAGCTGAGCACCTCCTCCCTGAGACAGCAGCGGTCTAACCCCCGGCGCGGGAGGGACCCAGCCAGGGGGCTGTCCTAGTAGATTCCGGCATTGCCTCCACCCCGCTGTGGCGGAGACGCAGAGGGCGGGTCGCGCTCGAGGGTCAGGGAGGAGAGTGACCCGGCCCTGGTCCAGGGCCCTCCCTGCCCGCCTTGGGGCCAGAACTCCAGCCCTGGGGAGTGGGCAGGGCCTGTTTTCCGTGCCTCACGCCCTGCTTTTCGCCTCCTTCAGCGCTGTCTGCTAGCTGCTTTTCCTGCTCTCTCTCCCTGGAGGCGAACCCTTGTGCTCGAG
54985	HCFC1R1	1786;3581;3581	140.303471444569;211.277017592851;211.277017592851	156;345;345	NM_001288665;NM_001002017;NM_001288667	AGCAAGCCTGCCTTCCGCCACGCGCCGCCCGTCTTCCGCGCCCGCGCAGAACCTCGCGGCTGTGCCCGCCTAAAGCCACGCCCATCCTCTCTTGGCCACGCCCTCAGAGACTCCTCCCCTGTCGCCCAGATCCCACCCGCAGGACCCCAAAACCCA;AACCTCACGAGGCCTTACGTGCCTAGAGCGGTTCCTCTCCGTGGCGCCCTACCGCCTTCGGCGCGAAGGTGGCTGGTGCGTACCGTCCCGAACCCTAGGAGCCGAGGTGAGCGCCGCGAAGACCCCCGACATTAAGAAGTGGTGTCCACCGCAGCCCCCTTAAGCCGGATACCCTCCCCCACCCCGAGGAGCAAGCCTGCCTTCCGCCACGCGCCGCCCGTCTTCCGCGCCCGCGCAGAACC…
5073	PARN	911;153	107.012074643249;217.62091503268	125;210	NM_001242992;NM_001134477	GTCGCGGCCGGCGTCACCGCTGCGGCTGCCTCAGCTACTGCCGCAGTCGCCGCGGAATTCGGCGAGTAGAACCGCTGAGGCGGGCGCGGGCCCGGGTGGGGCCAAGGTTCCGGCCACTCTGCAGA;ACCGCTGCGGCTGCCTCAGCTACTGCCGCAGTCGCCGCGGAATTCGATTTTAAGAGTAATCTTCACAAAGTGTACCAGGCCATAGAGGAGGCCGACTTCTTCGCCATCGATGGGGAGTTTTCAGGAATCAGTGATGGACCTTCAGTCTCTGCATTAACAAATGGTTTTGACACTCCAGAAGAGAGGTATCAGAAGCTTAAAAAGCATTCC
4478	MSN	82	172.329268292683	188	NM_002444	GGCTCTTTCCTGGGTGGGGTTTGTGAAGTCGTGGCCCGTTAGCAGGAAGCCTAACAGTCGCCCCGACGCTAGTGAGGGACCCAATCTGAGTCCCCGGCCAGCCGAATCCAAGCCGTGTGTACTGCGTGCTCAGCACTGCCCGACAGTCCTAGCTAAACTTCGCCAACTCCGCTGCCTTTGCCGCCACC
55793	FAM63A	525	516.19619047619	694	NM_001040217	GAGGCAGGCAGAGGGAAGAGAAAGGGTCTGTTGTTTTTCTCTCCTGTTTCTCGCTCCCTCTCTGCTGATCACAAAGCTGCTGACCGGGTCAGAAAGTCCTGATGGAAATCCACCAGCGCTGGGCAGGCCCCTCCTCCTCCAGGGAGCTTGTCCTTGCCTAATTTTTCTTCGTCCTGATGAGAACAAAAAAGAGAGAGAGAAGAAAAGAAAAACCACAAACTTCCTTTGAAAACCAGCTTGTAGTCAGGGCCCGGAGCGCATGCCATAGACTCGGCGACTCAGGAATCCTGAAGACTCTCTGAGCGACCTGGAGCACCTTGGCTGTGTCCCTGCCTGCCTTCACCCTCCTCCAGTGCCCCCAGTACTGGGCGTGAGTCCGGAAGTGGCCACAACCCAGCC…
51582	AZIN1	5761	591.288838743274	590	NM_148174	ACACTTTCAGGCTCTGATCGCGGCCGCAGTTTTTCCTTTTTTCTTCTGCCGTCGCCTTCTCTGCCTCTTCTCATCCTTTCTCGCTCTGCTGCTCTGCAGTGTGACGAGTCCGAATCCTCTTCCCACCCAGCCCGCGCCTTTCTTCTTTTGCCTGCGCTGTTCTATTTCTCCTTCGGCCGCCGCCGCCACTGCTGCACACAGCTGGTGTCGGTGCCGCGCTTTTACCCCCAAGTCGTTCCCGCAGCCTATGGCCCAGGCCGCCTTGGGTATTTCTGCTCAAGGTAACCACATCCCTCTTTAAAAATTCCGCCGAAAAAGAGAAGACGCTTTACCCGACTCTTTGGGCCGTTATCTCACGGCGAACTTTCTGACCAAGTATACAACTACCCAGAGGGCCTA…
53981	CPSF2	260	268.957692307692	253	NM_017437	GCTAGTCTCCAGCTCCAAAATGGCGGCTGCCACTGTGGGGCTTCTGCCGGCCGGTAGTCCCTGGCGCTGCTGACCCAGCATCGGCTTTTCTACGTCTTGAACCTGGATTCGCCTAGGGGTTGGGAAGGGCTGTGGACGGCGTTGGGGGAGGCCTGACGAGATTAATAAAGAACTCTTCAGAATTCCTGGTGTTTCATCATATATACGACTAAGATATCAACTCTTCTAGCTTGCTGTTTCTGGACCAAAAAAA
84520	C14orf142	908	15.705947136564	7	NM_032490	GGTCACC
84335	AKT1S1	1675	679.460298507463	700	NM_032375	ACCATTTTGCTCGAGGGCATGGCCTAAGCCGGTCAGCTAAGGCCATGTTAATACGGGGCTGTCCCATCTCTCTGCGGGGCGCGACAGCTGGAAGAGCCGAACGGATAAGAGAAGAGGAGGTGAGAGGAGCTGTACACCACAAGAGGCACTGAGGGACTCAGGATAACGGGATGAAGCCGTCAGTGCCCCCAGAAACGAAGCGGCCCCGGACGAATTTCTGAGTCACCGTCGCGAGAAAGCGGGCTGAGCCGCCATTTTGAAGCCTGGCAAACCGAAGCAAGAAATGCTGCCGTGTTGGATCTTTGCCAGCCTTCGTGCCGAATGGGAGCAGGTTGGAGGGAGGGAGAGCCAATATACACTATGGGCTGATTAAGCCCGGTTGGCTGCCATGTTGTTAAC…
55633	TBC1D22B	780	133.017948717949	119	NM_017772	GGGAGCGGGTGACCGGCGGCGGGGAAGCGGCCTGGGTTGGCCCTCAGATTGCGGGGTCTGGGGGCATCTCGCCGGGCAAACCCTTGGCCCGCCTACAAGGACTTCCCCCGGCCAGAGCA
55132	LARP1B	63	187.142857142857	190	NM_018078	GCCGTCTCCACGCCTCCGCGGGCAGTTACCAGCTTTGGCTGCTCGCGCCTCCCCAACTCGGGTAAAGCTCCTCGGCCTCGGCGTGCTGCGCCTCCGCGGCTGCCCTGCGCCAGAATTCGGTTCCCTCAAAATTATAAAGGCAGGAAAGCTCAAGACAAAGAAATCCAACAAGGCTAGTGATTTCAGTGAT
5264	PHYH	50	21.48	22	NM_006214	GGGGGTTCCCCGCGCCGCAGCC
563	AZGP1	82	13	13	NM_001185	CCAAGCAGACACA
132671	SPATA18	77	247.285714285714	245	NM_001297608	GGAGCCAGGAGACCGCGCGGGACGGCGGATGAGGCGCGGCGGCTGCGGCCCAGGGCACCTCCCCTCTGGCTTCCCGAACCCGGCCAGGTCCGACCCGAGGGGGAGGATGGAAACACCTGCCGCGCTCTGAGCCCCCCAGAAGAGAACACCCTTCCCGCCATATCACCCCACGGTCCTGCGGAGGCCACCGCCTGGTCCCCCCAAGTCTCCATCGCGCAGCGTGGGGCCGAGAGGAATAGTGAGCG
10300	KATNB1	212	369.037735849057	352	NM_005886	AAGCAGCGGCCAATCAAGGCAGGGGATGGAGGCAAGTGGGGGTCGCGCCTGGAGCGGAGCCTCGGCCTCCGGAGCCGCAGCTGCAGCCCTGTATTGAGCTGAGATGGCTCGAGCCTAACATTCCATGATCCAGGATCGTGACAGATGTGCACAGGCTGCTGCTGTTGCTGCTGTGGGTAATTTGGAACCACGAGGCACCCCAGGGCCAGAAGACGAGGCATTCTGTCTGCCTGGATGTGTGGGAACTCTCTGCCAACTTGATTGGTGGATCTGGGGGGGGATCCACCCCCACCCCACGAGGAAAGCACAGTTTATTTTGTGGGTGGGGCTTCAGGTGCCAGCCAGCTGAAGG
9772	KIAA0195	365	221.134246575342	217	NM_014738	AGAGTTGCCAGTAACGGACATGGCTGCGGCCCCCGGAGGAGGGGACGTGAAGTGAGGAGGGGGTTGGGAGGGGAGAGGACGCGGGCGAGGAAGACCAGCCCCGGGGCCCCGATGTTGTGACTGTGACAGACTCACTGGGGTTTGTACATGCTGGGGAGGAGCCTTCCTTTCAGGGGTGACCACATTCATCTGGGCATGCCTGCAGTACTCTTGGCCC
51474	LIMA1	2177;2177	108.664676159853;108.664676159853	106;106	NM_016357;NM_001113546	GGTCGCGACAGGTGCGCTAGGTAGAGCGCCGGGACCTGTGACAGGGCTGGTAGCAGCGCAGAGGAAAGGCGGCTTTTAGCCAGGTATTTCAGTGTCTGTAGACAAG;GGTCGCGACAGGTGCGCTAGGTAGAGCGCCGGGACCTGTGACAGGGCTGGTAGCAGCGCAGAGGAAAGGCGGCTTTTAGCCAGGTATTTCAGTGTCTGTAGACAAG
10162	LPCAT3	1281	75.191256830601	84	NM_005768	GGAATTGGGGGTGAAGCGATAGCGTTTTGCCCGCATTCGGGGCGCGCGGAGCTGGGGGGTCCCTGTGGGGCTCCCGGAGTTAAG
9556	C14orf2	4531	57.71948797175	60	NM_004894	GACCTTTCCGAGTTGGCTGCAGATTTGTGGTGCGTTCTGAGCCGTCTGTCCTGCGCCAAG
54874	FNBP1L	613	173.94942903752	191	NM_001164473	GGACGCGTCGGCGGCGGAGGCTTCTCCAGTCGCGTCTTTCTCACTCACTGGGGAGCCCGGCGGTGGCGGCACCTTTCGAGGTAGACCCGCTGAGCTGCTAGCCCGCCGGCCAGCGAGTGAGAGGTCGGACAGACTGTGGAGCCGACAGACTGAAGGACAGCGGCACCGCCAGACGGCCAGAAAGTTCCGCC
4938	OAS1	162	72.382716049383	47	NM_001032409	GCAAACAGGTCTGGGAGGCAGTTCTGTTGCCACTCTCTCTCCTGTCA
54741	LEPROT	56;55	49.089285714286;153.309090909091	66;171	NM_017526;NM_001198681	GGCTTGGGCAGGCTGCCCGGGCCGTGGCAGGAAGCCGGAAGCAGCCGCGGCCCCAGTTCGGGAGAC;GGCTTGGGCAGGCTGCCCGGGCCGTGGCAGGAAGCCGGAAGCAGCCGCGGCCCCAGTTCGGGAGACATGGCGGGCGTTAAAGAGAAGAAACCAGTGTGTGTGTAGTATGTGTTTTTTGCATGGGGCAGTTGGTAAAAACACCGCGTCCCTTATCTGTATGGCTTCAGAGCA
56967	C14orf132	191	135.722513089005	144	NM_001282464	GAGCCAGAAGCCCAGAGACAGCCGAGTGCGCCGTGCGGTCTCCGGACGCTCGCTGCTCAGCCCGATCCCCGCCAACTGTGCAGGCGGCTGACCCGCAGCGGCAGCGGCAGCAGCGAGGACTCGAGCGCTGGCTGCAGCGACACC
25829	TMEM184B	363	358.884297520661	412	NM_001195072	GAGTCCGGCTGCCGCGCATCGTCCGCAGACGCCGCCACCGCCATGGGCTCCTGAGGCTAGCTTGTCACTTTCTGCAAAGGTTTCCCTCAGGGAGCCTCCTGCTGCCAGGCACCATGACAGTGAGGGGGGATGTGCTGGCCCCGGATCCAGCGTCGCCCACGACCGCAGCAGCCTCGCCCAGCGTCTCCGTGATCCCCGAGGGCAGCCCCACTGCCATGGAGCAGCCTGTGTTCCTGATGACAACTGCCGCTCAGGCCATCTCTGGCTTCTTCGTGTGGACGGCCCTGCTCATCACATGCCACCAGCCCAGGGCTCGGCTGGGCCAAGTGTGATGTCATGAGAGCTGGGACGAGACACCCAGGGGCTGCCTGGACTGAGGACTGTGGTAGAGCAGCTCTT…
780	DDR1	56	224.125	349	NM_001954	CAGAAGTAGGAGGGGCGTCTTCCCCTCGTGGGCCCTGAGCGGGACTGCAGCCAGCCCCCTGGGGCGCCAGCTTTGGAGGCCCCCGACAGCTGCTCTCGGGAGCCGCCTCCCGACACCCGAGCCCCGCCGGCGCCTCCCGCTCCCGGCTCCCGGCTCCTGGCTCCCTCCGCCTCCCCCGCCCCTCGCCCCGCCGCCGAAGAGGCCCCGCTCCCGGGTCGGACGCCTGGGTCTGCCGGGAAGAGCGATGAGAGGTGTCTGAAGGTGGCTATTCACTGAGCGATGGGGTTGGACTTGAAGGAATGCCAAGAGATGCTGCCCCCACCCCCTTAGGCCCGAGGGATCAGGAGCT
132001	TAMM41	1615	236.931269349845	238	NM_138807	GCCTGTGCGACCGCCGCCCACCCGAGCCTATCTGGGCTGCGTCTTCTCGCCGCTGCTCTTCGTGGCCCAACGCCCCAATCCTTGCGTGTGCTTGCAGTCCCACCCCACACTCAGCCTTGTGTCCCTCGATCCAGTCTCCGACTTCCATTTCCCACCCTAAACCGCCTACCCGGTGTCTGTTCCCCGCCCGGTTGTCCTCGCCCTGCTGCGCTGAGTGTCCCCTGTTAGCCTCGACCCC
6780	STAU1	652;652	163.395705521472;237.935582822086	145;220	NM_017454;NM_017452	CCCTCCCTTCGTCCCTTCTTCCTCTCCCTTTTTTCCTTCTTCCTTCCCCTCCTCGCCGCCACCGCCCAGGACCGCCGGCCGGGGGACGAGCTCGGAGCAGCAGCCAGAAAGCATAACCCCTACTGTAGAACTAAATGCACTGTGC;CCCTCCCTTCGTCCCTTCTTCCTCTCCCTTTTTTCCTTCTTCCTTCCCCTCCTCGCCGCCACCGCCCAGGACCGCCGGCCGGGGGACGAGCTCGGAGCAGCAGCCAGAGTTTATTAACCACTTAACCTCTCAGAACTGAACAAAGACAACATTGTTCCTGGAACGCCCTCTTTTTAAAAAAGAAAGCATAACCCCTACTGTAGAACTAAATGCACTGTGC
9669	EIF5B	3219	141.409754582168	148	NM_015904	TCCAGTGCGCGGGTCTGTGGAGAGCCGGGTGCGAGCGGCGGCAGCACGAGGGGAAAAGAGCTGAGCGGAGACCAAAGTCAGCCGGGAGACAGTGGGTCTGTGAGAGACCGAATAGAGGGGCTGGGGCCACGAGCGCCATTGACAAGCA
8726	EED	782	420.044757033248	441	NM_003797	GATCGAAGGAACGGGCCAATTGCGGCTGAAACGTCTTTGGAAGGAGGAAGGGGGTGAGGGAGCATCCCTTTGAGTTTCGCCTCTTCTCGAGGCGGTGGTGGGAAGGGAGACATACTTAATACTGCCCTCTTAATCCAACGGACCTTACATCGTGTAGACTGCCGGGAGGGCGGCGGGAAAAGGGCAAGACGGGAGTTGGGGAAGGGAAGGAGCCAGGAAGCCGCGCGGGAGGGCGCGCGCGCGCGCCCCTTTTTCAGCAGTGTGGCGGGGTCGCACGCACGCCCGCCTCGGCGGCTGGGCGCGATTTGCGACAGTGGGGGGGGCGGTGGAGGTGGCGGCGGCAGCGGCAACTTTGCGGCAAGCTCGGGCCGGGCTTGCTTGACGGCGGTGTGGCGGAGG…
55129	ANO10	947	95.332629355861	98	NM_001204832	CCCCGCACCGAGCACTCTTTCGCCCGGCCTCCGGTTCTCGCCGGCTCTCGGACCCGCCTCCGAAGACGTGGAGCGCTGCGGCGGCTGATTTGTCAAAG
3860	KRT13	352	74.0880681818182	82	NM_002274	GTCCACTCTGGGGAAGAGCCACAGTCCTCGGCCCAGGCCAAGCAAGCTTCTATCTGCACCTGCTCTCAATCCTGCTCTCACC
4779	NFE2L1	5527	615.691876243894	612	NM_003204	GGAGGCTCCGAGCTCTAGGCCGGCCGGCGGTGGCGGCGGCGAGGCCGGGACTCGGGCTTAGGGCCTGCTGTGGAGGCAGCGGCGGACGCCGAGCTAAGCAGTTTCTCTGGAAACCCCCCTGGTAAGTGTGGAGGAGGCGGGACACTCTGACCCAAGACGAAAGGCCTGTAGCTCCAGCCAAAGAAAATAAACCTTAGGAGGGAGAAGGAAAAAAAAAATCCATCAGCTGTTCCTGAGAACAGCCTGCATTGGAATCTACAGAGAGGACAACTAATGTGAGTGAGGAAGTGACTGTATGTGGACTGTGGAGAAAGTAAGTCACGTGGGCCCTTGAGGACCTGGACTGGGTTAGGAACAGTTGTACTTTCAGAGGTGAGGTGTCGAGAAGGGAAAGTGAAT…
23276	KLHL18	249	17.429718875502	16	NM_025010	GCAGCGGCCGGGGAAG
9537	TP53I11	141	79.333333333333	121	NM_006034	GGCACGGGCGGCGCGATGTGAGGCGTCCGAGCCCGGAGCCTCCGCCTGGCATCAGCTCCACGTAGCCCAGCGCCGGCACGCGCGAGGCCCCCCTTCTGCAGAGGCCGGGCTGGAGGAGAAG
4152	MBD1	158	169.993670886076	146	NM_001204136	AGAGGAGGCGGCCGCGGAGGAGGAGGAAGGGGAGGAGGGCGAGGCGGGAGGTGCAGGAGGGACCCTCGCCATGGGTCCACGGGCCTAGAGTGGCGGAAGATACCGGCCTGGTGCCAAACTGGCTACTGCTGCTTCCTGTGGCCTCC
64225	ATL2	430	26.9976744186046	27	NM_022374	GGGGAGTTAATTTTAAATCGGTACAAG
7264	TSTA3	709	44.352609308886	42	NM_003313	GTCGGGGAGCCGGCGGTGGGGCTGGACGCAGGTGCAACTGAC
2778	GNAS	1912	16.266213389121	9	NM_001077489	GCCGCCGCC
9631	NUP155	2369	128.339805825243	147	NM_153485	GAAGCGGAAGTGCGTCATGTCGAGGCGCCAAGGCGCTCGTTTGGCGCGCGCGCCCTAGGCGGCGGATCTAAGCTAACTTCTTGGATCTTTTCTTGTTTCTCCTTGGTTTTTGACTTTTTCTGGACCCTGGTGTCTACGATTTCCGAG
138162	C9orf116	613	44.3132137030995	60	NM_144654	GTGACCTGGCCGTCGCTTGGCAACAGGACGCCGCCGAGTCCCGCTTCTCCTCCAGGCACA
1797	DXO	450	223.075555555556	222	NM_005510	GGACTCGTTGGCGGCGTGGAGGGGCGCCGGTGGCCACGTTGGTGTCAACCTCCTTCGTGAAGCTCACACCTCCCCCGCCCCGGGAGGGGTTTGCCCGCCACTGTCGCTGAATGATTGCATCATCGAAAGCAGAAAACCACTTTTGCATCCTTCGGCCTCTGGCGTGCCTGCCATGACGTCATAGCTCTGCGGAGGTGGAAGTTGGGGAGCTTTGAGGACCTC
83940	TATDN1	3594	89.5027824151363	33	NM_032026	CGCTTCCGCTGGGGAGGTCCTCCATGCGCAGTC
6773	STAT2	470	110.995744680851	111	NM_198332	GAAGTTGTAGGCGGGGCGCGAGGTTCTAGTACCCGAGCTCATACTAGGGACGGGAAGTCGCGACCAGAGCCATTGGAGGGCGCGGGGACTGCAACCCTAATCAGAGCCCAA
92482	BBIP1	275	97	97	NM_001195307	ACCCGGGGCAACAGCTGAGCCGTCTGGGAAGGGATGCATCTTTTCTTCTGTATGCTTGAGTCAAGAACTCTAAGTCATCTTGGTAATACCGGGTTGG
4207	MEF2BNB-MEF2B	245	351.236734693878	296	NM_005919	GGGCTTCCGGTGCCGTTTCCCGGTTCGCTCGGCCGCGGTCGCTATGGAGGAGCCGGAGATGCAGCTCAAGGGGAAGAAAGCGCCGTGAAGAACCTGGTGGACAGCAGCGTCTACTTCCGCAGCGTGGAGGGTCTGCTCAAACAGGCCATCAGCATCCGGGACCATATGAATGCCAGTGCCCAGGGCCACAGCCCGGAGGAACCACCCCCGCCCTCCTCAGCCTGATCCTGGAAGAGACTCGGGGCCCCCCAGCCTCCGCCAACCCAGACAAAGATCATTCCACTCAGCCTGGGACG
148523	CIART	1538	126.891417425228	125	NM_001300839	GGAGAGACGGCGAAGGAGCTGGAAACCGAGCCAGGGCTGAGCCGGCTGACAACAGGCATCGATCGAAGGTTTCCGGTAACCAGCATACACCATCTCATCCGAAACAGCGGGGTTCGGCTTCTCCT
283848	CES4A	84	133	133	NM_001190201	AGACGCTGCCTGGATTTTGCTTTGGGTTCCGTCTTCTCACTGCGGACCCTGGATTGAAACGATCTCCCCGCGGCCGCCGCCGCTACCTGGTGCCCGCAGGTGCCTGCAGGAGTCCTGGGGCCAGCTGGCCTCG
1388	ATF6B	12662	14.7208971726426	11	NM_001136153	GGGGGGGAAAG
6905	TBCE	1401;1639;1639	153.372591006424;106.458816351434;106.458816351434	139;110;110	NM_001079515;NM_003193;NM_001287801	GCTGCTGGGCAGTTGGCTGGAGGGGCTGCTGCTGGGAACACCTGGAGTCTCCGCGGGCAGGTGAGCTTCAGAGGTTCGGGGAGCTTTCGGAACGAGCATTCCTGGCCGATCTCATATTTTGGATTCTGGATATATTATA;GGCCAGAGCCTCAAGCTTCGCTGCTGGGCAGTTGGCTGGAGGGGCTGCTGCTGGGAACACCTGGAGTCTCCGCGGGCAGATCTCATATTTTGGATTCTGGATATATTATA;GGCCAGAGCCTCAAGCTTCGCTGCTGGGCAGTTGGCTGGAGGGGCTGCTGCTGGGAACACCTGGAGTCTCCGCGGGCAGATCTCATATTTTGGATTCTGGATATATTATA
80254	CEP63	365	168.641095890411	173	NM_001042400	GAGTTCATTTGCTCGCGTGCAGGGGAAGTCTGGAGAAGGCATTGTTTCAATTATTAAAAGTGTGGGGGCAGTGGGCGGAACAAACGCGCCGACTACAGAGGCTGGACGTAAGCTTAGCGGTGGCGCGCGTGCGCAGCGCCGGCCCGAGTTGCCAAAACAAAGGGGATTTGGTG
122961	ISCA2	1401	13.221984296931	10	NM_001272007	GTGGAGGAAG
63931	MRPS14	1604	8.863466334165	9	NM_022100	GCGGACAAC
51104	ABHD17B	274	558.664233576642	560	NM_016014	CAGTGGCCAACTCCTGGCTCAGTGGGGATTGTGCTCGTCCCCTCCGTTCCCCTCCAGTCTTCCTCCCGCTACCGGAACGAGCCTCGCGCTTGGCAGGCTGAGGAGGAGCAAAGAAAGCAGGATTAAAGAGAAGGAAGACCTGGCTAGGTCTGGGTGGCGTCTGCAGTGCCAGAAAGGGAGGCGGTGGCGGCGGCGGCTGCGACCACGGCCGCGCGGGACGTGAGGCCCGAGAGCAACCGACGGGCAGCGGCGGCCGCTCCAGCGCCCCGCACCGGGGCCGTTAGTCAGCAGAACGCGAGCTCTTGTGGAGGAGCAGGGCCGGCGCGAGGCGAGACTCGGGAGCGTGAGCGGGGCCCCTGGGGCGCCGCCGTCCTTCTTCGCCCCGGCGCCGGGGGCTGT…
841	CASP8	85	271.235294117647	271	NM_001228	GTGTCTGAGCTGGTCTGAAGGCTGGTTGTTCAGACTGAGCTTCCTGCCTGCCTGTACCCCGCCAACAGCTTCAGAAGAAGGTGACTGGTGGCTGCCTGAGGAATACCAGTGGGCAAGAGAATTAGCATTTCTGGAGCATCTGCTGTCTGAGCAGCCCCTGGGTGCGTCCACTTTCTGGGCACGTGAGGTTGGGCCTTGGCCGCCTGAGCCCTTGAGTTGGTCACTTGAACCTTGGGAATATTGAGATTATATTCTCCTGCCTTTTAAAAAG
55040	EPN3	1266	375.76224328594	350	NM_017957	GCGGGAAGAGCTGCTACCCATTCCAGGGACCCTGCCGCTGCCCCTCTGAGGGGTCTGCACCTCCTGGGAGCAGGTGGGTCTCTGGGACGAGGGTCCATGGTGGATGGCTCTGGAGACGCTCCCGAGGCTGTGCCGTCCCGCTGCTGCACAGGTCGGAGGGTCACCGCAGAGGCTACTCGGGCTGGGGCTGGGGCCGAGGGAGCCCGCACTGGAGCCCCATGTGGAACCCAAGGATGCAGCTGCTCTGCTAACACGGCAGCCCATCCTTCAAGACTGTGACCTCGCCACAGTGGCCCTCAGCCCTCCACCTCCGGCGGGGGCGAGGGCCACCCACCTCCAAGTCTCCAGCC
900	CCNG1	671	188.241430700447	164	NM_004060	GGCGCTGCCGAGGCCTCCACCCAGGACAGTCCCCCTCCCCGGGCCTCTCTCCTCTTGCCTACGAGTCCCCTCTCCTCGTAGGCCTCTCGGATCTGATATCGTGGGGTGAGGTGAGCAGGCCCGGGGAGGGTGGTTACCGCTGAGGAGCTGCAGTCTCTGTCAAG
79798	ARMC5	81;81	315.358024691358;315.358024691358	272;272	NM_001105247;NM_024742	CGCTTCCCGAGGTAGGCGTGAGAAGCTCGACGCGGACCACATCTCCCTCATGCACCGCCCGCACGTCCCAGGATGCGCTGCGATTAAGGTACTGCCGCGCCTCGTGTGCAAGGACAGACTTCCGGGGTCGAGAACTACAACTTCCGACTTGCATCACTGCGGTGGCGCTAAACAGCGTCAGCGAGGCGGTGCCCGACGATTTCCCTGTCTTCCAGTTCCGCTCCCTGGGATCAGCGGCGAGAAGCGGGGCGGAGTCTGAGGCCCGAGCCAAG;CGCTTCCCGAGGTAGGCGTGAGAAGCTCGACGCGGACCACATCTCCCTCATGCACCGCCCGCACGTCCCAGGATGCGCTGCGATTAAGGTACTGCCGCGCCTCGTGTGCAAGGACAGACTTCCGGG…
100506144	ZMYM6NB	3116	17.163671373556	20	NM_001195156	ACGGTGGGGGGAGCGCGGCC
57691	KIAA1586	510;550	402.576470588235;60.472727272727	421;75	NM_001286276;NM_020931	GGGAAGGGGAGTGGTGGCGGCTGCGGCAGTAGGGACAGCAGGAGCAGTGGTGCTGTCAGCGCGGCCGTCGGAGACATGGGAGACCCGGGGTCGGAAGTGAGTAGTCGAGTGAGGGTCCTGGCGTTCTCAGAGGCGAACCGCGAAGGGTTTGTGTTTTCTGCGGTCTGAGGCCTGGTGCTCCGTCGCAGCCTCGGGGCGATACCTCTTCAGTGTCTTGGGCCGAGCCCAGCTCTGGGGCCTGATAATAGAATCTGTCCCTCCAGCTGGCCCTGAGGCATCTGAGTCAACAACGGATGAAAATGAAGACGACATTCAGTTTGTCAGTGAAGGACCATCGAGACCTGTTCTTGAATACATCGATCTGGTCTGTGGTGATGATGAAAACCCTAGCGCCTATTA…
5937	RBMS1	2423	192.07635163021	215	NM_002897	GGAGGAAGAGGAGGAGGAGGAGGAGGAGGAGGAGGAAGAGGAGGAGGAGGAGGAGGACGTCTGGTCCCGGCTGGGAGGTGGAGCAGCGGCAGCAGCAGCAGCCGCCGCCGCCGCCGCCGCTGCCGCCGCCGCCGGAAAGGGAGAGGCAGGAGAGCCCGAGACTTGGAAACCCCAAAGTGTCCGCGACCCTGCACGGCAGGCTCCCTTCCAGCTTC
91687	CENPL	2718	500.968359087564	368	NM_001127181	GAGTCGGGAAACGATTTTAAACTGAAGAGGCGGCGGAGGGCCGAATTCCCTTTTCTCAACGGCTTGATTTCAGAGCTGGGCTGGTCTCTGACAGGCTCAGCTGGAGAGGGACGGGTTGGGACGCACTGTCCTTTTGCCCTTCCCCCTCCGCGAGCAGAAGCTGACTCCGCAGGAGCGAGGGTCGCAGAGCTGGGTGAGCGGAAATGTCCCTCCCAGAGTGAAGTCGCAGGGCCCGCCCCGCGTCTGAGGGAGCGGAGGTCTTCCTGGGGGATTTCAGTCTCCACATAGTTTTGGAGCCGGACTTTTGAAGAATGATTCGTGAATCCGGAATGGGTGACAGCGTCATCACGGCATTTTATTGACAGACC
7726	TRIM26	409	463.58435207824	456	NM_003449	GTGCAGGAGCGGGACCCGGAACAGACCGCCGTGAGAGAGGAGGGGTGCCGGCCGGGATTCGCGGCCCGGAGCTCGGGACCGGAGTCAGGAATGGAGAGAAGGGTAATGGTTTTACCTCTTATTGTGGAAACCTGTTGAGATCACAGAGAATATACTGACGGCATAAAAGGGCAGAACCATAGCAGGGTGCGGTTGCTTCATTCCAGCCTCGCAGTCACCTCTGTGCCCTGCTGGTTGTCTTCCCAGCGCTGCTGTAGTTGCCTTCCATGGATCTATAGGAGAGCAAGTCCTCCAGGAGCTGGTGGTGTCTGTCGATTGACTGAGTGCTGGAGCTGGCAGCCCTGTGCAGGCTGCCACCTTTGCCCCTTTACTGTGCTTGCTCCTGACTCTATGTCGCGT…
56900	TMEM167B	990	120.245454545454	150	NM_020141	GGCGCTCGCCTCTCGGCCCTTGCTCCTGCGTACTACGGCTTCTTCCAGTCACCTCGGCCCGGATCGGGAAGTGTCAAGCGGGCGCTCCCCCATCTCCGCCGCTATTACCACTGAACCCGGACCCCCTACCCAGGTCCAGGGCCAGCCGCC
6817	SULT1A1	60	118	118	NM_001055	ACAGTGGACCTAGGAAACCCTCAGCTCAGAGAACAACCCTGCATTCCCCACACAACACCCACAATCAGCCACTGCGGGCGAGGAGGGCACGAGGCCAGGTTCCCAAGAGCTCAGGAAC
10521	DDX17	512	79.1171875	74	NM_001098504	GCCATTTTGTGCAGTCGCTGGGAAGGAAGGAGACGCCTAAACCGCGGCACTGCCCGGTTTGAGCGTAGCCAAAC
5910	RAP1GDS1	89	122.359550561798	112.5	NM_001100426	GGGTCCCTCCCTGGCTGCGGGAGAGACGGAGGTAGAGGGAGGACACAGAGCCGCGCCGCCCGCACCACAGACCTTCGCCTCGCCCCGCCGGTTCCTCACCCTCGGGGAGCAAC
54855	FAM46C	204	132.009803921569	133	NM_017709	GGCTCACTCGGTGCCGCTGCCTAGGGGCTGTAGAGGTCGCGCCGCTCCTGCTGGGGCCTGCCCACGCCAAGGACCTGCCTCTGTCGCCTCCTCTTCTATTGCCCAGTTTCCCCAGCCAGAACATCCCCTGAAG
51319	RSRC1	662	122.783987915408	120	NM_001271838	GAGCTTAAACTGAAGCAAGTTCGGTGGACGCCGGCGGCGCCCTGATCTAAAGAAACGACTCAGGGACTGCGGCGCTTGCACGTCAACGGGAGGTGTGAGCCCAAAGGTCTGGACCCAGAA
9221	NOLC1	5932	42.446561024949	63	NM_001284389	GCCCCTGTTGGGTTCCTGAGTCGTGCTGCGTCGACAACGGTAGTGACGCGTATTGCCTGGAGG
7812	CSDE1	4428;4428;3669;3669	414.849141824752;414.849141824752;68.342327609703;68.342327609703	448;448;61;61	NM_001007553;NM_007158;NM_001242893;NM_001242892	TCCTACGTACCGGGCCGTGCTGCTTATGGCGGCGCTGGAGAGGGGGCGCTGAGCTGTTGGGTATGAAGTGTAACAGAACAGACTTTACCACCTGAAACTGCTGCTTCAAGTTCAGATCAGGCAAGGAACAAACCTCGTAACAACTAACAAGACCAAAGAAGAGTACACTTAAGTTGAAGACACAACACTTGATCTGAAACAAGAAGTTTGTGCCTACTCAACAGCTTTGAAAGAGCACTTCCCAACGCTGCTAGTAGTCTTTGTTTTCTTCAGTGCTGTACTGTGAGATTGCCCGGTACAGCAGCAGTTGTATTCTTTATTAGCTTGGTAGATCATTTTCTCTCGCTCTTTTTTTTAATACTAGCAACTTTCATCCTTTGAAACGTGTGCTGAAAAAGA…
5694	PSMB6	24262	14.557827054653	11	NM_001270481	GGAGGAGAAAG
6391	SDHC	311	9.14147909967851	7	NM_001278172	ACCCAAG
79161	TMEM243	109	242.779816513761	245	NM_024315	GTGTTTGTTTCCTTTCACTTCCTGCGGCAGCTGCTCAAGATGAGGAGGTGCGCGGGGCCGGGGCGGAGCAGTCGCGTTCCCCGCGTGTGAGCCCCCACCCATCCCTGGCGCCAGCGCTTCCCCGACCACTCGGGTTCGGCTATGCGGGAGCCGTGAGGAGGAGGCTTGCAGTCGTGGACCTGAGACCTCGGGAGGTCATGCTGTCTTGCTTTTAAGTGGCTTGGGGAAAGTGAAGAAACCCCAAA
23071	ERP44	1525	170.47737704918	151	NM_015051	GCTGGAGCCCGGGTCGAGAGGACGAGGTGCCGCTGCCTGGAGAATCCTCCGCTGCCGTCGGCTCCCGGAGCCCAGCCCTTTCCTAACCCAACCCAACCTAGCCCAGTCCCAGCCGCCAGCGCCTGTCCCTGTCACGGACCCCAGCGTTACC
10961	ERP29	11007	28.379394930499	16	NM_006817	GCAGGAACCCGGCGAT
6239	RREB1	159;592;592	16.874213836478;312.508445945946;312.508445945946	2;376;376	NM_001168344;NM_001003700;NM_001003699	CA;TCCGGAACAAGTTTGCATCTCTCCTCGGTCTCTCCCTGAAGCCCACCGGTCCCCAACGCATCATGCCAGGGAGCCAAGCGTCCTGCCCGGCCGTTGCTCCGACTGTGTGTTCCAGGAGTGGTGGCTCTGAGGTGTGACCCTGCCCACGTTTGGGCCCAGCCAGGTTCAGCCCCCCAATAAGGAGGGCAGCTTGATAACACAAAGAAAACAGTGTCAACGAGTACTACCAAGAGAAGAAGACAAGAGGTCAACACAGACTCATTTTCTACTCCGTGTGAATGATAGCTACAGCAGGGGAAAGTTTCATAGTCTATCAGTGGGTCAGAAAATGGAGTTTTATAGCAGAGGCTTCTTAGAAGCTTAAACCCCTGTCCCA;TCCGGAACAAGTTTGCATC…
8825	LIN7A	93	203.774193548387	205	NM_004664	CTCGGATACCTGCTCAGCTCCGCACCGCAACTGAAGATCTGCCGCCGCGGAACAGTTGCGTCTCCATCTGGCTACCAACCCACCCAAGCTTTCTTCTCCACCACCACCACCTTCCTTCCTTCCCCCTCCTCCCCCTCCTTTCCGTCTTCCCTCTCCACCCCCGCCCCCAATCTCCTCCTTTTTTTCTCACTACGAGCGGTTGCTG
85004	RERG	1632	329.543504901961	337	NM_001190726	GCAGTCCCTCCGCCGCTAGTCGGAGCGAGCGCGAGTGAGGAGACCCCCGCCGGGCCACTGGCACTTGCTTCTGCGGCGAGTCCCACCCACGACCGCAGCCCAGCAACTCGCAAACGCAACCTGAAGCCTGGGCTGCGCAGTGTGGGAGGGCTTCGCGATCTTGGGGGACCCATTCCGAACTTGCAGAGGACCGTAGCTCTCCTGGCCTGGAGAGTGTGAACAGGATTGTGGACTCTTCCAAGATTCACAATGATATGGTGAATCCAAAGACTGGAACCAAAAAGATTTACTCAGTGCTTTAGTTTTAACAACAGTAAATTGTCTACCAACACCCATC
29957	SLC25A24	1542	36.537613488975	36	NM_013386	GACTTCCTCGGCCAGGCCGCCTGCGCCTCTGGGACC
401466	C8orf59	93	74.537634408602	69	NM_001293320	GACGCCGTACGTGCCAGATGGTGTTACCTGGAGCTTAAAAAGCTGCACGCAAGTGTTAAACTTCTGACA
889	KRIT1	89	911.842696629213	984	NM_194455	ACCCTAGTCTCCTAGTCGCCTGCCACCAGCCCCTGAGAGACTGCAGGTCCAGTGAAAAGGAGCAGGAACGGCAGCAGCCCGGCCGCCGACCCGGAAGCTCTTTCACCGCCAACCGCGAGGCTGCAAAGGGTGTGAACCCGGAAGCGATTTCATAGCCACGGTAACGGCGGGGTGGAAAGCTAAGGCCTTTGAAGACCTGGGACCCCGTAGTTTCGGGAGAGGGTGAGGGGTGAATGGTGCTGAGGTGCGAGGAGAGGGAAGGACAGTAAAGAGCAGGTGGGCAGGAGGGTCTCCGACTCCAGAGACCTGAGCTTTTGGGGCGCGGGTGGGAGCGCGGGGGAACCCTCAAGACGGCTTTCTTTTGGCGACTGAGGGTTTTTCTGCCACAGGAAGCTGGGC…
7068	THRB	119	510.243697478992	501	NM_001252634	ATGAATAATGTGAGTGCGCTTGGAAAAGAGACCTCCTGCTCCGCGGGCTCGGGGCAAGAGCCCGCAGGCTACCTTCCCCGGGCAGGGGCGCTCAACCCAACCGGCTCCAGGGCACTGGTAATTTGGCTAGAGGACCGCGCGGAGGCAGCGGGATCTGCGATTTCCTTCTGGTTGGCTGTCCTGCGTGGGTGCCAAGTTCCACACATGATTTAATGAATAAGAAGGGGGCTTGGAGGCTCATAGCAAAGGTCCTTGAAGAGAGCAAGAAAAAGTCTTCCCAGGAAAAGTGGACACCTGAGTGAGTGTTACAACGAGAAGGGGGGCATCCCAGGCAAGGCAGCTACCAAGCACAGGTGTGAAGTGACTTCACTGTAGGAAGAGGAAATGCAGAAAAACAAA…
5868	RAB5A	3957	428.558503917109	481	NM_004162	ACCGGGCAGCGGAAGTGGCTCCGGCGGTGGGACTTGAGTGTTTGTGTTTTGGTTCGTGAAGGAGCCGGCGGCTGGCCTTAGGGGAGGAGGCAGAGGGAGGAGGAGGAGGAAGAATTAGTCGGAACTCCAGCGCCGGCGGCGGCGGCGGCGGCGGAGGAGGAGAAAGGAAAGAGGAAGGGGGAGCGGCGAGAGGCGGAGACGGAGCCCGACAGGGGCGGCACCACGGCACGAGCCCCGCACAGTCCAGTGTGAGGGGAGCGGCGCTAAGAGCAGGCGACGCCGCCGCCGCCACCACCACCGCCATAGATACACTCTCATCCTACGGGCCACGCCTGGGCCTTGCTGCCAGGAAGCTTCGGCCCCGCAGCTCGGCTTGCTGCGGTCTCAGGTTTCTTTACC…
10456	HAX1	8597	94.095498429685	95	NM_001018837	GACGCCTCGCTCAATTTCTCACAGGGCTGCGCAGGTTTCCCCCGTCTGCGAATGGACCACTGGAGGGGTTCAAAGGTTCGCGTCCCAGTACGGGA
10476	ATP5H	2286	43.4575678040245	42	NM_001003785	GCGGAGGACCGTGGGCAGCCAGGGTCGGTGAAGGATCCCAAA
4291	MLF1	165	228.909090909091	226	NM_001130156	GAGTGAGGCGTCGTCCGTACTGGAGGCTAGCTCTTGTCGCGGCCGCGGCGAGTTAACATCGTTTTTCCAATCTGTCCGCGGCTGCCGCCACCCAAGACAGAGCCAGAATGTTCAGGATGCTGAACAGCAGTTTTGAGGATGACCCCTTCTTCTCGTGAGTTACGGGAGCCAGGAGTCCGGGGTCGCGCGGGAATTAAGTGAGTCCATTCTTGCACACCGAGAAAAT
10667	FARS2	331	161.247734138973	158	NM_006567	CTGTCAAAATGGCAGCGCCCAGCGTGCGCGGGTATCTCTGAAGTTGGGGTTTAAGATTCTTGCCCGTGAGAGCGAACGAGCCTGCCGTACTTCTGATTTTGAAACACCTGGGTCTGGGCTTCCCGGGCGAGCGGTGGAACCTGTGAGAAGTTTCTACA
5119	CHMP1A	3972	108.601208459214	107	NM_002768	GTCCCCGCCGGGTGCAGCTTGGTCGGTTCGATCGCCGCCGGGACCTGACACCGCCCGGAGTTGGCGTCCCTTCTCCCTCTCCGAGTGCTGCTCCTGTCATTGTGGCC
967	CD63	2122	67.155984919887	58	NM_001780	GGAGCCGCGGCGGGAGAGGAACGCGCAGCCAGCCTTGGGAAGCCCAGGCCCGGCAGCC
51134	CEP83	325	464.624615384615	470	NM_016122	GCCGCACCCCTGAGGATCCCGGTCCACGCGGAGGAGTGGGGCTTTTCACCGCCGCCGCCGCCGCCCTCGGACCTCTCCCGGGATACTTCACATTTCCCTAGGGACGGGAGCCCGAGGGGTCCGTTCGGCCCTCTTCCTCTCGCTGGGCCGACACCCCGCTGTAGGACCGTAACCCTTAGTCCCAATGCCTCCGTAAGCGGAGTTGAGTGGGTGCCTGTGGTTGGAGCTGTGGAGGTGTCCCCGGTGGCGAGCGCGGCCAGAACTGCGGTCACTTAAGTTTTCCGTGTGCGGGTTGCAAGGAGCGTGCGTGCGTCTGGTATAGGGAGGACACCTCTGGATTGAGGATCTTATGACCTACTTTAGAGGAAGGTATAATTTGGCTTCCTGAGATTCTGCCTT…
10644	IGF2BP2	55	65.9818181818182	70	NM_001291869	GGGCAGCGGAGGAGGCGAGGAGCGCCGGGTACCGGGCCGGGGGAGCCGCGGGCTCTCGGGGAAGAGACGG
6845	VAMP7	488	132.635245901639	143	NM_001185183	GTAGACGGGGCGCTTCATGCGGAAGTCAGCGGCGTCCGGTCCCAGCCTCCTCTGGGAGCGGGCAGTTGGCGACCCTGCACTGACCCGCGTCCCTCCGTCCCGAGCCCGCGCGCCCTCAGAGGGTGCCCGGACAGACTGAAGCC
7138	TNNT1	129	63	63	NM_001126133	GCCCTCAGCAAGGCTCAGCCTCAAGATTCACAGCATCTCAGACACAGCCTAGGCCGCACCAGG
56902	PNO1	1075	51.1274418604651	47	NM_020143	GCAGCTGCGCACGTGTTTCAGCCGGCAGCGCTTTAAGATTTCCGGGG
23397	NCAPH	1633;1625	73.6680955296999;227.734769230769	68;223	NM_001281710;NM_001281712	GGCCGTTACGGCGCTCAGGCGTCTCGACGCGCGCGATTTAAAACCAGCTCAGGAGACGCCAAGGAAAG;GGCCGTTACGGCGCTCAGGCGTCTCGACGCGCGCGATTTAAAACCAGCTCAGGAGACGCCAAGGAAAGATGGGACCTCCCGGCCCAGGAGTATTGACATTTCAGCTACTATCCCCAAGTTTACAAACACGCAGATTACGGAACATTACTCCACCTGTATCAAACTGTCCACTGAAAATAAAATCACTACCAAGAATGCTTTTGGTTTGCACTTGATTGATTTT
78987	CRELD1	526	580.6463878327	600	NM_015513	GTGGCAGCGACGCGGTGAGGAGACGGCCCACGGCGCCCGCGGGCTGGGGCGGTCGCTTCTTCCTTCTCCGTGGCCTACGAGGGTCTGGATCCTTCTCTGCCGGCTCGTGGGCCGTGCCTTTGCCCTTCTGCGAGGCCCTGAATCTGATCCCTTCCCTTCATATCCGGATCCGGGCTCCTCCCTCCAAGCCCGGGGTTCCGGACACCTCCCCCAAGACAACCCCTCTGGCCTCCTCTCCTTCAGTACTTGGAATCTGATCTCTTCTCCCTAATTCTGCGGATCCGGCCCCTAATATTCTTTATCAGACCCTCAGACAAGAGGCTGACTTCTGCCCCCTTGTCAAGGAGCGAGGCCACTTTCCTCTCCACCCCATGCTAGCGAGGATAACTTATTTCTCTT…
387496	RASL11A	353	604.243626062323	604	NM_206827	GCTGGGATTACAGGCGTAAGCCACCGCGCCCAGCCCCTTAGCACCTTTTAAAAATAAAAAGGGCAGCGTTTTACAGCAATCTGTCCCATTGTTGCAGAAACATCCAACTGATTGCACTTTTTCTTCTTCTCTCGTCAACTCGTAACTCCTATCTCAAGTTCACCCACAGGTCTAGTGACTCCGGCTGGCTGCTGCGGGGCGAGGAGACTCGCAGAATGCCTGACTAGAGGCCACTCGCGCGCTCTGGACGGTGGCCGTATCTCCAGGGTCTGAGCCCCGGAGCCGCAGTCCTGCCGCAGAGCGCCTGGAGCCGCGAGCAGCTAGCAGCCCGGCGAAGCGCACAGCCTCGGCGATAGTCAGCTCCGCGGCCTCTGCTCCCGCCCCTCCCGGCCGCTCCGG…
10298	PAK4	2227;2227;2340	154.663224068253;154.663224068253;224.975213675214	155;155;228	NM_001014832;NM_001014834;NM_001014835	GATGTTCGTTGGGGATTCAACATGGCGGCGGGAGTGTCCGCGGTGGTGGCGGTGCAAGAGAGCTGAGGGAGGCGCGAGGGCGCGGAGTTCCAGGTCGAGCAGTTAGGCCGCGAGCGACTGCGGCGCCGAGCCGGCCGCACCGAGTCCCCGGCACC;GATGTTCGTTGGGGATTCAACATGGCGGCGGGAGTGTCCGCGGTGGTGGCGGTGCAAGAGAGCTGAGGGAGGCGCGAGGGCGCGGAGTTCCAGGTCGAGCAGTTAGGCCGCGAGCGACTGCGGCGCCGAGCCGGCCGCACCGAGTCCCCGGCACC;GATGTTCGTTGGGGATTCAACATGGCGGCGGGAGTGTCCGCGGTGGTGGCGGTGCAAGAGAGCTGAGGGAGGCGCGAGGGCGCGGAG…
51136	RNFT1	1394	80.071018651363	74	NM_016125	GTTGCCGCCGGGCTGAGAGAAGAGCTTGCGGGGTTTGCGGTTGATGGCCCCGACTGAAGGGCTGGAGGCGGTGT
53407	STX18	54	40.111111111111	22	NM_016930	GGGGCTGAGGGTGCGGGTCGCT
57693	ZNF317	1201	259.629475437136	243	NM_020933	ACATGGGCCAAGGAGGGGTCAGCGGCGAATTCTTTCGGCCTGTTGGGGACCCCTCGTGTCCCCACGCCAGACTGGACCTCCCGTATGAACTTCTCTTCGCATCGGCGGCGGCTTCCGTCACCTCCGCTCCCCCGATCCTATTCCCAGTCGTATGCCAGCTTGGAGAGTCACGTGAGAGCAAGAGAGTAGCTTTCTGGTTGTCCTGGTGCCCTGCTCAGGCAAACTGACTGCCATTCTCTGAGG
5110	PCMT1	517	3.76789168278501	2	NM_001252052	GG
84193	SETD3	126	96.150793650794	92	NM_199123	GCCACCGCCTGGGGGTTGGTTGAGGCGGACGGCGGGGTCCGGGCCGGAGTACGTCGTTCCCGCTGCGCTAGGGGAAGCGGGCAGTCAGAAAA
5296	PIK3R2	60	378	403	NM_005027	GAGCATGGTGGCAGCCTGCACCCTTGGCTCCCTTGTCTGGTGCAGCCAGCAGAGCCGCCAGCCTTGGGCGCCCATGGCCCTCCGTGTGAGGGCGTGAGCGGCCTGCCCCAGCCTCACCTGCTGATGGAGGACTCAATGGCCCAGTGACCTGACACCACACCACCAACTCCCTCCCACCAGCTGACGAATGGTGGACCCAGTGACGAGTGGCCCTTGTAAGGGTCATGGAATAATTTGAAGCGAGGCATGAGCGGCCCCTGTGGTCGCCTGTGACTGCTGGAGATAGAGGTCCCAGCACCCCAAGCCAACCCAGCGGACCCTCCCAGCCCTGCTTCAACCAATGGGGCCAGTGGGGCTCCAAGCAGCCACCTAACCATCCAGACCCCACCCCACTCACGC…
3422	IDI1	51	166.529411764706	167	NM_004508	GGGTGGGGCGTGTTGACCCCCTTAAAGGCGCCAGAGCCCGCGGTCACGGCTCAGGTTCCCGGTGCTTCGCGCGTCTGCCGTTGTCACAGGCCAGGGAGGTGGCACCACCAGGCGAAGCTTGGCGAGATTGTGTCGTCAAGCGCGTACGGGCGCCAATTGGCCGGGCG
9812	KIAA0141	374	93.195187165775	103	NM_001142603	GGGTACTCGGCCACTCGGGGCATCGCGGCGGCCTTTCTAGCCGCTGTCCCAAGGGTTGGTCTCGCGCTTTCGGCTGCGAGCTCTCTGTGGTGCTGGCAGCGAC
2954	GSTZ1	602	142.790697674419	152	NM_145870	GGCGACCGGAAGGATCTTTCTAGTCCAGCCCCTCGCTTTACCCGGACGAAAGACACGGGCCTGATTCGTCGAGTCTCACTGAGCCTTAGTCGTCGGCAGGTCCCAGGCGCGAAGTTTCTCGGCCTGGAGGAGGGGGTCGCGCGAAGTGCCAG
9904	RBM19	825	105.197575757576	95	NM_001146698	TCGGTAAAGATGGCGGCGCCCAGGGCGGTAGCGTGAAACTTGGTGGAAGACGCTGACCAGTCGTGTTGGAATCAAAACAGCGGGGACCCTGCGCC
1327	COX4I1	6330	83.481516587678	55	NM_001861	TCCGGTCGCGGGACACCGGGTGTAGAGGGCGGTCGCGGCGGGCAGTGGCGGCAGA
256471	MFSD8	245	76.395918367347	40	NM_152778	GCGAGAGTTGGGCGCAAGACGCCTTGTAGGGAGTGTAACT
5440	POLR2K	14711	71.39575827612	63	NM_005034	GGACTAGCCGGGTTGTATTTGGAAACGCGGAGTGAGTTTTTCCGTGCTGTGTAGGGGCTAACA
10712	FAM189B	67	534.059701492537	552	NM_006589	GGAGCGTGGTGGGGAGGGGAGCGGGACAGGCGACACAGGAGACAGCGGCGCCGCGGCCTCTCCCCACCAGGCGGCCCCGGATCCTACTGGACGCCCTGAGGGCACACCGACCGCGCCTCTAGAGTCACCCCACGCCGACCCCTCCCCTCTTCTCTAGACTTATTTCCATCCTTCCCGCTTTTACCCTCCCCACCCCTCCCTGGGCTCCAGGCCGCCGCCCCCTCCTCACTCCTGGACCGGCCCTTCTCGGTGCCCCTCTTCCCTAGGGAGATGCGATGAGCCGGTGCCCCCGCGTCCTCATCGTCGCCCCGGGCACGGTGCCCGTCCAGTGCCCGTGGTGGGGAGGGAGCACTCCGCGGTCCCTCCGTGACGCCCCTCGCTTGGCCCCCCCCACAGCTG…
10818	FRS2	295	480.64406779661	470	NM_001278355	GGCACAGCGGCTGAGACTCGATCTGCTCCAAGTAGGGGCTCCAGCGCGGGTCGGAGTCTGGGGGTTCGCGCCCGCCGACCCGCGCCCTGCTCCCTCTCAGCACCTGGGCGGACGATTGAAGGTTTGTGGCAACCCTGTATTCAGAATTCTGTATCAGTGCCATTTTTCCAGCCAGCGTGTGCTTACTTCATGTCTCTGGGTCACATTTTGAAATGACCATTAAGAAGTAGATGCCCAGATGCAAAAGTGATGAAACAGTCCATTTGTCATAAAGTAAGATGCAGCTGTGGCATGTCAACCAGCTTGGAACAAAATTGTATCTGTTTTTCTCAGAAGAGAATTCCACAAGGTTAAATCAGCAAACAAAGAAAACATGGTATTTTGAAATATGATTAAACT…
3008	HIST1H1E	96212	61.1257223631148	61	NM_005321	GAGTCCCGGCCAGTGCCTCTGCTTCCGGCTCGAATTGCTCTCGCTCACGCTTGCCTTCAAC
64421	DCLRE1C	1071	906.411764705882	890	NM_001289079	GAAGTGGCGGCGCGGTCAGGGCTGGCCTTGGCTTCAGCTGCGGTTTTGGGGTCCCGGACTCTGGGATCGGCGGCGCTATGAGTTCTTTCGAGGGGCAGATGGCCGAGTATCCAACTATCTCCATAGACCGCTTCGATAGGGAGAACCTGAGGGCCCGCGCCTACTTCCTGTCCCACTGCCACAAAGATCACATGAAAGGATTAAGAGCCCCTACCTTGAAAAGAAGGTTGGAGTGCAGACACACCTGATCACATACAAGCGCGTATTTCCAAGTAACAATGGTGAGGGACCACTGTTGGAGGAGGTCCAGGGACACCGTGTTTCCACCCCCACCTTGTGCTCTTGGTGGCACTGAAATGGTGTGCATAGCTTGAAGGTTTATCTATACTGTTCACCTGT…
23112	TNRC6B	154;528	326.214285714286;210.221590909091	346;211	NM_001024843;NM_001162501	GTGTTTGTGTTGTGGTTTTGGGGGAGGGATGCGGAGGGGAAAGTTTGTTTATTTTGTTTTTAGTTTTTGGGGTCCCCGTGCTGCTGCAAGGCGAAACGGGAGGGAGTGACCCCTGCGCCCCTCAGTCCCCCCTACGACGTCGCCTCCATAGTCTGCGGAGAAGCGGAGACTGCGCGCCTCGCCTCACAGCGAAACGCCGCGCACTCGGAGCCGGCACGGCTCGGCGGGTTGTGGTTTTTTGCACTGAATGTAACCTAGACTCATCTTCACGGGCTTGTGTTGCCCCAGGTACTGTCAAAGGCAGTATTTTTGTGTTTCTGCAGAGTTTTGCACAAAATCTGTTCCC;AGAGACAGAGAGGGAGAGAGAGAGCAAGAGGGAGAGTGTGTGAGAGAGAGTT…
26580	BSCL2	2538;133	191.98463356974;117.684210526316	189;108	NM_001130702;NM_001122955	ACGGTTGCCCTGGCAGCGCGCGAGGCTGGTGAGTCGGCAGCCCTGTGGCAGCCGGCGGGCTGGTTTCCATGGTTGCACGATTAGGAACCACCAGCTGCTGCATCCCATGGCCAGGGGTGGCGTCCAGGTGGCAGAGCAGCTAGGAACGCAAGGCCTGAACCTGGGGCCAGACACCCTGCTCTCCCGGCC;CAGGAAAATGTGATGCGCCACAGGTATCAGCGTCTGGATCGCCACTTCACGTTTTAGCCACAAGTGACTCAGTGGAAGATCCAGAGTCAACAGAGGCTCGTCAGGAAG
9673	SLC25A44	2554	149.604933437745	145	NM_014655	CAGTCGAGATGGAGGAAGATGCGACCGGCAGACGGCATTCGCTGGGAACGACGGATAGACTGGGGGCTGCGGCCTAGAGGTCCGGGCTTGGAGTTCGCCTCAGACGCGGTGGAGCCGCCGGAGTCTGAGAAGGTCTTCAGGCACC
1786	DNMT1	1560	23.732692307692	24	NM_001379	GCCGCGTCTGCTGAAGCCTCCGAG
90933	TRIM41	3276	514.233516483516	722	NM_201627	CTCGCTTCCGGCATCGGCTGTGGGGAGTACCGGCTGCAGTCGGCTGTGCCGGGAGGGTAGGATGGCGTCTGGCCGATGCGGTGATAGCACCGAAAGCAGACGGCCGCCAGGCGCTCCCCCTACCCCCCGAAGTTTCTCCCCAGCGGCGGGGGATGGGGGTAGGCGGTTCCTCTGTTCTTTCTGCGTTCCCCGCGGCCTCTTACCACAGAGACGCGGGCCTCCACCGTCCTAGCCCTCCCGCCCTGTTCTCTAGTGCGGACTAGAGCGTCTCCTCGCCATTTCCTGTCGCCCTGGGGCCCCGCGGGGAAAAAGGGGGAGTAGCAGGACAGCGGAGGGAAGTCGCGAGCTTAGGTGGTGTGTAGACGCCGGAAGTGTTGGGAAGGAGGCCGGAAGCTAGGG…
10728	PTGES3	12289	227.527870453251	295	NM_006601	GCCGCCCGGCCTCACCACCCCTCGTTTGCACGCACGCACGTTCATTCTCCGTCCTCGCGCCCCTTTTCCTACACTTTCCTCTTCTCCCCGACCGGAGGAGCCGCTCTTTCCGCGCGGTGCATTCTGGGGCCCGAGGTCGAGCCCGCCGCTGCCGCCGTCGCCTGAGGGAAGCGAGAAGAGGCCGCGACCGGAGAGAAAAAGCGGAGTCGCCACCGGAGAGAAGTCGACTCCCTAGCAGCAGCCGCCGCCAGAGAGGCCCGCCCACCAGTTCGCCCGTCCCCCTGCCCCGTTCACA
7086	TKT	54528	78.244736649061	80	NM_001064	CTCGGCAGCCGCCTGTCGCCGCGGGAGCAGCCGCTATCTCTGTGTGTCCGCGTGTGCGCCCGGTCCCCGCCTGCCGCACC
25897	RNF19A	1561	191.848174247277	180	NM_183419	GCGCTTCCTCAGGCTGCTGTCGCCGCTGCTGGGAGATGGGCCTACTCGCCCGCCACCCTGCGCTGCCGCCGCTCTGAGGAGTTAAAGAACATCCATGATAGCAGTCTTCTGTAAATCGAACTTTTCAAGAATTCTCTGAAGGAACCAAGTAGGATATTCTTACATCATGACTTAATGTGA
25936	NSL1	1157	8.739844425238	8	NM_001297739	GACGAAAA
83896	KRTAP3-1	344	53.9941860465116	54	NM_031958	ATCGAGACACCAACAGACTTCTCTCAACTCAACAAAAACCCACCTCCCATTGCC
55529	TMEM55A	506	95.766798418972	100	NM_018710	GCAGCGGCAGCAGCGGCAGCAGAGGCAGCAGCAGTAGCCACCACTCCGCCGAGGCCGCAACCCCGGCTCGGCCTCCCCAGGCCCCGCCGCTGCCGCAGTC
114548	NLRP3	121;121;121;121;121	230.04958677686;230.04958677686;230.04958677686;236.04958677686;230.04958677686	229;229;229;235;229	NM_001127462;NM_001127461;NM_183395;NM_001243133;NM_004895	TGCTGGGATTACAGGCGTGAGCCACTGTGCCCGGCCTTGGCTAACTTTTCAAAATTAAAGATTTTGACTTGTTACAGTCATGTGACATTTTTTTCTTTCTGTTTGCTGAGTTTTTGATAATTTATATCTCTCAAAGTGGAGACTTTAAAAAAGACTCATCCGTGTGCCGTGTTCACTGCCTGGTATCTTAGTGTGGACCGAAGCCTAAGGACCCTGAAAACAGCTGCAG;TGCTGGGATTACAGGCGTGAGCCACTGTGCCCGGCCTTGGCTAACTTTTCAAAATTAAAGATTTTGACTTGTTACAGTCATGTGACATTTTTTTCTTTCTGTTTGCTGAGTTTTTGATAATTTATATCTCTCAAAGTGGAGACTTTAAAAAAGACTCATCCGTGTGCCG…
5339	PLEC	1556	60.825835475578	63	NM_201379	AGTGCGGTGCGGGGCTGGACTCTGCCTGGTGGTGGCACAGCCGCCCTCAGCCCCGGCGCAGAC
966	CD59	101	172.742574257426	175	NM_203329	GAAGCGGCTCGAGGCTGGAAGAGGATCTTGGGCGCCGCCAGTCTCTCTCTGTTGCCCAAGCTGGAGTGCAGTGGCACAGTCTTGGCTCACTGCAACCTCCACCTCCTGGGTGCAAGCGATTCTCGTGTCTCAGCCTCTCAAGTAGCTGGGATTACAGGTTCTGTGGACAATCACA
3093	UBE2K	8803	171.608883335227	133	NM_001111113	GTGGTAGTGGCAGTGTTCGTGTGCTCAGGTCTGAATCGCCGAGGGAGGAGGCGGTGGAGGAAGAGGTGGCGGCGGTGGCGGTGGTCGTAGCGGTGGCGGAGGAGGCGGGTACGAATCAGCTGCGGGCGGAGAC
7841	MOGS	82	147.146341463415	150	NM_006302	GGCGGAGGCGGAGGCGCAGGCGCTGGCTGGCAGGTGTCGCTAACCGGACGGTGGTCGCCAGGGCGAGAGGCGGGAGCCGGAGAGGTGAGGCAGGACCCGGGCTCCACTGCCGCCTCTCCGAGCTCTTGTGACGCGGACCTCAGTGCCAGG
1072	CFL1	44898	84.35529422246	78	NM_005507	CAGTCGGGTCCCGGCAGCGGCTGCAGCGCTCTCGTCTTCTGCGGCTCTCGGTGCCCTCTCCTTTTCGTTTCCGGAAAC
137492	VPS37A	181	282.193370165746	264	NM_152415	TGGCCGGTTTGGGCGTCTGGGCCGTGAAGGTGGGACCTCCTGTTCCGGGCCGCAAGTTTCCCTCTCCAGCCGCCCGCCGTTCGTAGCATGTCCCCCAGAACTCGGGGAGCGCAGGCAGGACAGGCTTAGAGAAGACGCGGTCCCCAGCGCTTGGGCCACGGACGTCCCACCCCGCTCCTCTGTCGCTGGAGAACCGCCGGGCCGAGCCACTGGGAGAAGCAGGCCAGAGCCTTCCAGGGCCTCCGGCCCGTGGACCCGAGGAGG
5116	PCNT	627	58.189792663477	39	NM_006031	CCCGTCACCGCCGGGCGGCCCGCGCGGAGTCTGAGGGAG
25805	BAMBI	280	375.807142857143	376	NM_012342	GGCTGGCGCGGGCGGGAGCTGCGGCGGATACCCTTGCGTGCTGTGGAGACCCTACTCTCTTCGCTGAGAACGGCCGCTAGCGGGGACTGAAGGCCGGGAGCCCACTCCCGACCCGGGGCTAGCGTGCGTCCCTAGAGTCGAGCGGGGCAAGGGAGCCAGTGGCCGCCGACGGGGGACCGGGAAACTTTTCTGGGCTCCTGGGCGCGCCCTGTAGCCGCGCTCCATGCTCCGGCAGCGGCCCGAAACCCAGCCCCGCCGCTGACGGCGCCCGCCGCTCCGGGCAGGGCCCATGCCCTGCGCGCTCCGGGGGTCGTAGGCTGCCGCCGAGCCGGGGCTCCGGAAGCCGGCGGGGGCGCCGCGGCCGTGCGGGGCGTCA
29893	PSMC3IP	1124	291.385231316726	290	NM_001256014	GGGAAAGGCGATGAGTAAAGGCCGGGCAGAAGCTGCGGCGGGAGGTAACGGCGCCGTGGGCGCGGGGAAGACCCGGGAGGGCAGTGGGTGAGGAGGTCGGTTGAGTGGCCCCCTCCCCTGCCTTTCTCTCCGTAGCCGCCGGGATCCTCCTGAGGTACCTGCAGGAGCAGAACCGGCCCTACAGCTCCCAGGATGTGTTCGGGAACCTACAGCGGGAACACGGACTGGGCAAGGCGGTGGTGGTGAAGACGCTGGAGCAGCTGGCGCAACAAGGCAAGATCAAAGAGAAG
51586	MED15	516	74.313953488372	63	NM_015889	GTGACTGAGGCGGCGGCGGTGGCGGCCAAGCGGGATACGGGCGGCGGGAGCTGGGGAACAGGC
81624	DIAPH3	198	125.984848484848	113	NM_001258368	GACTGTTTGGGTGGCGGACCCCGGGAGTAAAACCTGTTGTCGATCCCTCAGCTTCCAGCTTGCGGCTTGCTGAGTGGCCACCTTCTTTCCGGTCCCCGGAGCTGCGGGGAAAG
51150	SDF4	4690	253.163326226013	252	NM_016547	GCCCGCAAGAAAGATGGCAGTGGCCTGATCCGGGCCCGTTGGCGGCGTCACTGACGCTTCGCTCCGGTCCTCGGATCCCGAGCGCGGGGAGGCAGACCGACTGTGAGCTGCTTGTCCCCATCCTGCGGCCGTCCTGGGGACACAGAGCCCTCCGTGGTGCCCGGGGATTGGATTGGAGCCAGGACCTCACTTCCTCCTCTGCCCCTGCCCCTGCCCCTCCCAGCACCTGGCCCACACCCTGCAGCCCGCCCC
118738	ZNF488	155	199.877419354839	203	NM_153034	TCCGGCGCCAAGTTCAGAGCCACGCGCAGTGCTCTTGGCCGGGAGGAGGCTGTGCTGCACCAGCACCTCTTGCTCCACATCTCCAGAGAGCCCAGGGCCCTGTGGCCGAGTGTGTCCAGCCCAGTGTCATGGGGAGCTTCCATATCTCATGGCTCCTTGCTGGGCCAAGCCCTCCAGAACCCCAAACCCCCAAAGACTGATGA
345778	MTX3	642	135.563862928349	140	NM_001167741	GGGATAGTAAAGGTCGGCCCGCGCAAGATGGCGGCCCCCTTGGAACTCAGTTGCTGGGGAGGCGGCTGGGGACTCCCATCGGTTCACAGCGAGTCCCTGGTGGTGATGGCGATGTACCAATTTTGACAACTGAAGACGAC
7701	ZNF142	468	408.307692307692	511	NM_001105537	ACCCCAGAGCTCTCGATGGTGCTTCTCCGGCTTCAGGGCTGGAGTGGGGGTGGAGGGCGGGAAAAACCACAGAGACAAAACATAGAGTACCCCGGCAGCCGGCAAGAGGAAGAGAGAGTGGCTTCCACATCCCCAATATCCTAGAGGCGGCTGAGCCGGAGGCGGTCGCACAAAGCGGGCCCCGGGGGCCGTTCCAGCCGCGGCCGACCATAGAGATGCGGCTCCCGCCGGCTCTGGGTCTGGAGATAGGAAAGCTGAGGCCCAGAGAAGCGAAGCGACTGTGTCTGTCCAAGACCACGCGCCCTCCTGCCCGGAAGATAAGCGTATTTCTTCTCTGGTGCCCACCTGTCTCCTACCTCACCCTGCCCTCCCGCAGGTGAAGGTTCTTAATCTTGACGG…
55749	CCAR1	573	111.225130890052	103	NM_001282959	GCTGACGGGTTTGAAATGGCTTCGATGTTAGCCGGGACCCGACTCAGGTGAAGATCGATGCTATAGAAGACAAACAAGGGAAGGTTTTTTTTCCTTTTGCATC
11258	DCTN3	5360	23.694402985075	20	NM_001281426	GAGGTGGGTCGGTAGTAGCG
90326	THAP3	134;134;134	13.932835820896;13.932835820896;13.932835820896	3;3;3	NM_001195752;NM_001195753;NM_138350	GAG;GAG;GAG
6832	SUPV3L1	646	559.506191950464	553	NM_001301683	AGACAGTGTAGAACCTGCGGCCTCGATGTCCTTCTCCCGTGCCCTATTGTGGGCTCGGCTCCCGGCGGGGCGCCAGGCTGGCCACCGGGCAGCCATCTGCTCTGCCCTTCGTCCCCACTTTGGGCCCTTTCCCGGGGTTCTGGGGCAAGTTTCTGTCCTTGCCACCGCCTCCTCCTCTGCCTCCGGTGGCTCCAAAATACCAAACACGTCCTTGTTCGTGCCCCTGACTGTGAAACCTCAGGGCCCCAGCGCCGACGGCGACGTCGGGGCCGAGCTAACCCGGCCTCTGGACAAGACTATTCCAATTCACCTGAAAATGTAAATGTCTTTGCTGCTTCCTGTAAGAAGATAGAATAAAGACATGGGTTTGTCAGCACTAGATTTTCTTCTGGTGGAGAA…
29101	SSU72	2046	41.821114369501	40	NM_014188	GAACCCAAGCGGGAGAGCCGCGGGATTTGCGGCCGCCGCC
170622	COMMD6	1015	294.173399014778	291	NM_001287393	GGGGGCGTTCTCTCGAGTCCGGGCCGCAAGTCCCAGACGCTGCCCATGGAGGCGTCCAGCGAGCCGCCGCTGGATGCTAAGTCCGATGTCACCAACCAGGTGGGTGAGCGGCCGCCCCGCCCTGTCCTCCGCCAGCCTGCCTCCCACGGCCGCGAGGCCGTGCCACCCTGAGCCTTCCCCAGGTCTCCCCTAGTCCTGTGTCCGCGAGCCGGTGACCTTCAGCCGTCCCTCTTGCATTGCTCCTTCTCTTTTGCACCTGAGCCGCTTGTAGATTTTCAGTGGAAACTGGGT
115286	SLC25A26	520;520	190.65;83.65	195;88	NM_001164796;NM_173471	GCCTCAAACATGGCGGCGCCCAGCGCGCGAGGACGTGATCCGCTTCTGCTCCGGCTTGGATTGTAGCCTTGACGAGGTCTGAGCGACCATGGACCGGCCGGGGTTCGTGGCAGCGCTGGTGCTGCTGCATTTTTTATCACCTATGAATATGTGAAGTGGTTTTTGCATGCTGATTCATCTTCATATTTGACACCT;GCCTCAAACATGGCGGCGCCCAGCGCGCGAGGACGTGATCCGCTTCTGCTCCGGCTTGGATTGTAGCCTTGACGAGGTCTGAGCGACC
7705	ZNF146	296;359	1018.53716216216;1113.43732590529	1022;1137	NM_001099639;NM_007145	AGGCCTGAGAAGCGACGTTGCTGGTAATAGAAGGTAATTCAGTACCAGCCTGGGCCTGGCCGCGGTGACCGAGGCGGGCCGCGTCGCGGAGACTTCTGGGAGTGCTTCCTCGCTCTCCGAGTGCGCAAGCGCAGCGCACCGAGTGGACATTTTGGTCTTTGTCCGCGGTTAATATGATCCTCTGTTGAAGCAAGAAGACAAACTGTATGGTGGAGAAAGAAGTGGGAAGGATCTGCGCGGAAGAAGCCTGAGAAGATGATGCACAGATAGAGAGGCACCAGGACTTGAGAGGCACCAGGACTTGGGAGGCATGTTGATCCATCTCCAGGAAAGACTGAGAAAAAGAGCGTTGAATATAAGAAAAAATACTTCCTCTGTTCTCAGATCGTATTTGTTTTA…
5464	PPA1	300	72.896666666667	64	NM_021129	GTCAGTCGGCGCCGCGTGCGGGCTGGTGGCTCTGTGGCAGCGGCGGCGGCAGGACTCCGGCACT
3303	HSPA1A	2786	212.798994974874	214	NM_005345	AACGGCTAGCCTGAGGAGCTGCTGCGACAGTCCACTACCTTTTTCGAGAGTGACTCCCGTTGTCCCAAGGCTTCCCAGAGCGAACCTGTGCGGCTGCAGGCACCGGCGCGTCGAGTTTCCGGCGTCCGGAAGGACCGAGCTCTTCTCGCGGATCCAGTGTTCCGTTTCCAGCCCCCAATCTCAGAGCGGAGCCGACAGAGAGCAGGGAACCGGC
54845	ESRP1	303	156.303630363036	143.5	NM_001034915	TTTTGCACTAGCAGTAGCAAGGAAGGGGGGTGGGCGCTCTTTCTTTTTCTCTTAGAAGAGGGTTTAGCACAGGTTTTTTCGTTCTCACTTCCACACCACCTTACCGCCTCCCGACCCCCCCTCTCCCCCTCCCCACCTATCGTC
29098	RANGRF	204	117.671568627451	118	NM_001177802	GGAGCTAAGCCAGACCCGGGTGGCGGTGGCAGCTGCGAAACCCAGGGAGCCGATGCCACGTGACCCAATGTGGACTTCTTTTAAACCTTTCTAATGCCCATAACCCAGCCTCAGACCC
51002	TPRKB	58	112.862068965517	111	NM_016058	GAAGAAGACGGGGATTGGCCATCGCTTCCGGAAGTTGTGAGCTTTGTTTCGGAGCGGGAGCTCTTCCGAGACGCACTGGGGGCCGGATGTAGAATCCTGCTTATCTGTGAA
2553	GABPB1	493	171.817444219067	160	NM_181427	TCGGAAAATAGCGCCCTGTGCAGCTGAAGCGCTTTGTGTGTAGCGGGGCCGCGTCAGCCCGGCCGGGTACGAGGCGCCTCGGGTCCCCGCACCACCTCCTGCTGCCTTCCCGTCGCCGCTCCCGAAGCTTTTCCAGGTCACAGCATATTTGTGGAGGAAG
283742	FAM98B	326	24.8834355828221	26	NM_173611	GCCGAACAGCTCTGGGCCAAAGGACC
10428	CFDP1	9005	119.49594669628	118	NM_006324	GGGGGCCGCCCTAGCTGCCGTCGCCGCCGCCGGGGCTCTATGGTCTCTCCCTAGAGCTTTGCCGTTGGAGGCGGCTGCTGCGGTCTTGTGAGTTTGACCAGCGTCGAGCGGCAGCAAC
8802	SUCLG1	81	23.049382716049	29	NM_003849	CCCCGGGGGCCTGGGAGTGTCATTGGCGT
170959	ZNF431	143	142.335664335664	137	NM_133473	GCCGCAGCCTGAGCTCCAGGTCTCCCCTTCGCTGCTCTGTGTCCTCTGCTCCTAGAGGCCCAACATCTGTGGCCCTGTGACCTGCAGGTATTGGGAGACCCACAGCTAAGACACCGGGACCCCCTGAAAGCCTAGAA
51389	RWDD1	543;555	84.913443830571;602.025225225225	97;627	NM_015952;NM_016104	GCCTGGCCGCCGCCCGCTCTCCCGGCGCGGCAGCTGTCTGGGCTGCTGCGCGCCGCCTAGGTGTCTGGGCGATCTATGGGCAAGAGCAAGGGCCACG;GCCTGGCCGCCGCCCGCTCTCCCGGCGCGGCAGCTGTCTGGGCTGCTGCGCGCCGCCTAGGTGTCTGGGCGATCTATGGGCAAGAGCAAGGGCCACGATGACAGATTACGGCGAGGAGCAGCGCAACGAGCTGGAGGCCCTGGAGTCCATCTACCCTGACTCCTTCACAGGCAGATGTCTCTCAGCTATCCCTGTATAGCTCCAGTCCTGTTCATGTTCTCTCTCACCAGCAGTACATCTGTGCTGTGAGGATGTTAAGGGGATGAGTGAAGAGGGGTTTGAGAGTGTCATTAACTGGCTT…
57461	ISY1	1717	106.336051252184	61	NM_020701	GGCCTGTGGAGTTTCTTGGACAGGGGCCGCGGGGCTCCAGGACGGCGCCCTTAGCGACACC
6747	SSR3	4962	33.637646110439	15	NM_007107	GCCTGCAGCTCCGCC
22985	ACIN1	1927;2672;2672	181.605085625324;310.009730538922;310.009730538922	182;303;303	NM_001164817;NM_014977;NM_001164815	GGGTAAGTGGCAAGATGGCTCCCCTGCATGTCTCCGGCTGATCGCTGCCGCTCCGCCAATACAATAGAGCCAGCCACTACCAGCAGCCTGGCCCTCTTCCTCCTTCTCCAGAGAGACCAATCCAGCCGAACTCGGGGTTTGCCAAAGGGATAAACAGCACTTCCAGGGGGAGAAAAAAAATC;ATTGTCACGAGTCCTTAGACTCCAACTACTGCGGCAGCTTCCAAATTTCCTGAAAACCCTAAGCTGGGCCAGCCCGGCAGCCCACGCACTTCCGGCCTCGGACCCGCCCCAAACACCCAAGCGCCCCAGCGCCTCATCTCTAGGTCCGGAAATAAACGAACATCTCCGATTATGGTTATACCAGGGTCGAGGGTTTCCGAATATATTCGATTCAAA…
51363	CHST15	110;110	464.136363636364;464.136363636364	443;443	NM_015892;NM_014863	AGGGGAGATCTTCACAGATGCCTCCGTGGATGGCATGGCAATCCATCCATCAATGAGAAGACCATGATTTCTTTTAATTTTCTGTGTGTTTCCACATTCCCCAGTGAGAATTCTTCCACCTTTTTTTGTGCCATGGGAAAAACCTGAAGGGCAGGCAGAGCTGCTCCCGAACTTGTGACCTTCTCTGAGGTTGCAGCGGCTCTTGTAGAACATGACTCTGGGACATCACTTCCTTTTGTTTTCTTTCGGAGCTGAACCAAAGAATGTGCACCCTCTTTCTCTAGTGCTGTGGTGTCTGCTTATTTTTGTATTTGTGCTTTCCATCCATCTTCTGTGATCACAAGGCATTCTTAAGGTTTTCTAGCACGACTTGCGGACATCCAGACTCGTGGGGGGCCC…
79026	AHNAK	108	194.962962962963	201	NM_001620	GCCAGACCCGCCCGGAACGGGGCTCGTCGCCGCCAGTAGCCGCAGCACCGCAGCCTTGGGCCTCGCGCCGGCTATGGCCGTGCCCTGGGGCTGAGCCCTCAGGTTGTGACCGAGATTCCCGACGAGAGAGACTGAGGGGAAGAGAGGAAGGAGGGGCGGGCTCCTGGCAAGGCATTCGCTCCTGAGCGGAATCCTGCAAAG
7745	ZKSCAN8	697	231.944045911047	232	NM_006298	CTCCGCAGATTTAGAAGTTAGTGGCCGGAGGGGCCTGGTCCGAGTACAGCTTTCATCGCCTTTACTCCCCGACCTTCCTTCGAGTCTGTTTATCCGTTGCAGCCTCCCTTCCCCACGACGGGGCGCCTCTGCAACTCACAAAGTACCCTTAGAAAGAGGCCCTCAGAAGAGTCTTCTCTTAAGAAGATAAAGAAGGTAGTGGAAACGAACTTCCTGAGCTTTTCAGGCTCTA
3875	KRT18	130739	54.87783293432	57	NM_000224	GGCCGCCACCGTCGTCCGCAAAGCCTGAGTCCTGTCCTTTCTCTCTCCCCGGACAGC
9141	PDCD5	1483	53.7801753202967	51	NM_004708	GCCGAGGGGCTGCGAGAGTGACCGCGGCTGCTCCAGCGCTGACGCCGAGCC
26993	AKAP8L	1081	81.506012950971	65	NM_001291478	ATCGCAGCGTCGGATGTTCAGAGCAGCAGAAGCCGGCGTCGTCGGATGTTGTGTTGCCCGCCACC
10574	CCT7	8343	286.337168884094	282	NM_001166285	GGCCCGGTCTCGGAGAAGAGGGGAGAGTGGCGGGCCGCTGAATAAGCTTCCAAAATGATGCATTGCTCATTCTTGAAGTCGTCTTCATCTTCTGTGCAGAGGCAGCATAGTACAGCAGTTGAGAGTAAGGCCTCTGGAGCTACACTGAATGCCTAGCCCACACCAGTTATCCTATTGAAAGAGGGGACTGATAGCTCCCAAGGCATCCCCCAGCTTGTGAGTAACATCAGTGCCTGCCAGGTGATTGCTGAGGCTGTAAGAACTACCCTGGGTCCCCGTGGC
478	ATP1A3	1120	110.007142857143	110	NM_001256213	TGTGTGTGTGTGTGTGTGTGTGTGTGTGTGTGTGTGTGTGCAGGCTCCGCAGTGTCGCAGCCTGGGGCTGCAGTGTGTGTGTGTGCAGCCCCTCATGTAGGGGAGCAGGC
3033	HADH	413	89.031476997579	104	NM_005327	AGGGCCGCGTAGGTCCCCGCCCCCAGAGTCTGGCTTTCCGCGGCTGCCCGCCTCGCGCGTCTTCCCTGCCCGGGTCTCCTCGCTGTCGCCGCCGCTGCCACACC
11194	ABCB8	753;752;753	68.946879150066;19.969414893617;68.946879150066	57;8;57	NM_001282292;NM_001282293;NM_001282291	TCAGTGGGATGAGGGTGAAACTGCTATTGCCGGCGGCTCCTGTTTTACCGCGTCAGC;TCAGTGGG;TCAGTGGGATGAGGGTGAAACTGCTATTGCCGGCGGCTCCTGTTTTACCGCGTCAGC
8517	IKBKG	1163	176.769561478934	123	NM_001145255	AGGGAAGGGCGACCGCGAAACTGGGACTTTCTCGGAGCGCCGGGGCCCTACCAGCGTTCACAGTCCGCCGCTCCCACCCTTCTCACGTCTGACGGACTCTGCTGACAGCCCTTGCCCTGTTGG
9933	KIAA0020	235	93.7829787234043	96	NM_014878	GGCCCGGGGGCGGAGCAAGGCAAGGAAGCGGAAGCGGAGAGGCGGTCGGGATCCGCTGCGCGAGCTGTCTCGGTCCCACGTGTGCGAGTTGCTACG
522	ATP5J	4740	116.529957805907	58	NM_001003703	GAGCGGAGGTGGTGGCGGCGGAGGCTTTGGCAGCTCGGGACTGAGTGCAAGAATCAGC
27077	B9D1	402	103.022388059701	154	NM_015681	GCATGCCACACGCGCACTCGCGTGGCCTTCGCGAAGGTGTCGCTGCCAAGAAACGTGTCCTGCGCGCTACGCCGTCTGTTTCTAGGGCAACGCCGGCGTCTCTTAGCAACCGCGCGCGGCCTAGGTGGGTCCCCCCGGCACCCCCAGACCTGCC
55914	ERBB2IP	350	356.837142857143	382	NM_001253699	GCTGGATCCTGCTTCTCGCCAAGGCAGGAAGTGAGTTTCGCACTGCAATTCCGGGCGGTGTCACGAGTGAAAAGTTTTGTTTTTTTTTTTTTCGGCGGAGATCCTCGTTGGGGCTGGGAAACTCCTGCAAAACTCGAGACCAGGAAGCCAGCCCGCACCCCAACCCCCACCAAAGCCACCTACTCTTCTTCTGTGGGAGGCCAGTCCACATCCGCTCTCACCCGAGAGAGATATTCAGCTGGATCCAAAGTGACTGATGAAGGGAAGGAAATCATGTCAAGCGAAGCCTTGAAAAAGCTGCCCTGAGACGGTGTCCCGCCGAAAGAATGTTGGCTCAATTAAGAAACATCAGGGAGATAAATTCAACCCAGTGTGTCTAAAA
9324	HMGN3	2376	105.159511784512	143	NM_001201363	GGAGCCGCGGAGGTGCAGGTCGAAGAGGCCGGGCTACGTCGTGCCCTGCGCGTGAGCAGCTGCAGAGGCAGAGGCAGCATCCAGCGGCGGCGCCAGCAGTTCCAGTCCGTTGCTTTACTTTTTGCTTCACCGACATAGTCATT
7403	KDM6A	246	745.691056910569	584	NM_001291421	GCTTTCGGTGATGAGGAAAAGAAAATGGCGGCGGGAAAAGCGAGCGGCGAGAGCGAGGAGGCGTCCCCCAGCCTGACAGCCGAGGAGAGGGAGGCGCTCGGCGGACTGGACAGCCGCCTCTTTGGGTTCGTGAGATTTCATGAAGATGGCGCCAGGACGAAGGCCCTACTGGGCAAGGCTGTTCGCTGCTATGAATCTCTAATCTTAAAAGCTGAAGGAAAAGTGGAGTCTGATTTCTTTTGTCAATTAGGTCACTTCAACCTCTTATTGGAAGATTATCCAAAAGCATTATCTGCATACCAGAGGTACTACAGTTTACAGTCTGACTACTGGAAGAATGCTGCCTTTTTATATGGTCTTGGTTTGGTCTACTTCCATTATAATGCATTTCAGTGCATT…
283927	NUDT7	417	66.328537170264	69	NM_001105663	GCTCTGCGCAAGCGCGACCGACCGAGCAGCTCCGAGGAGTCCGCCCGGAAACAAACATTCCCCAGGGCA
80308	FLAD1	1789	333.353269983231	351	NM_025207	GGGACATGAGGAAAGGAACAAGGGAAAGAGCCGGTGAAGGGGCAGAACAGGCAGGTGAGAGTCTAAGAGGGCTCAGTAATCTGAAGCTTGGTGGGAAGAAGGGATTCTGGGCTAGAAAGGGTGCAGAAGCCTGAAGTAGAAAGAGACGGGATTTTGGTCCGGGGTGGAGAGCGAATGCATTGAAAAGGGCCAAGGCCCAGGATAAGGTAGACATTTAAAGGGGTACGGATGCCCAAGGTAGAGCAGACACTTGAGGAGACCAGCTCAGCAAACGGAAGACACTTAAAGTGGTAGGTTCTCAAGAGAGAAGAAGTTTTTAAGACTAGAGCTAAGCAAGACATTTAAAAGGAC
253143	PRR14L	109	167.899082568807	146	NM_173566	GGCTCCGTAGGCTCAGGTAGACCTGGCGACGACGGGGCTGCAGCTGCAGGGGCTGAGCTGGCTGGGCAAGCGCGGGCCGCGGAGGAGGTCTCAGGGGTGAATCATTTGATGTAAAAGACTTGACTCCATAATCTGCATCTGTCCTA
389362	PSMG4	1039	26.051010587103	24	NM_001135750	GTGGGCCGGGAGCCGTGGGGCGGC
23428	SLC7A8	168	279.107142857143	293	NM_182728	GTAGCCACACCCACGCCCCCACAGGCCCGGCTTCCCTGCCCAGCGGCTCCAACCTCCAGCCTGGGCACCCAGACCCAGAGGGCTGCTGGGAGGGACATGCCTCACCCCTTTTGCTCCAGCTGGAGGGGAGGGAGTCTGTGGGAGCTGGCCAGAGCGTGGCAGAAGGCAGAGAAGTGAACGCCCCAGCAAAAGTGCTCCTCACATGGGTCAACTGTTCCAGTGTGCGGTGGGCCACCCGGGTTCAAGACATCTTCACAGCTGGGAAGCTCCTGGCCTTGGCCCTGATTATCATC
7417	VDAC2	1098	282.197632058288	268	NM_001184783	TCCTTCACTTCGCCCTCCAGCTGCTGGAGCTGCAGCCCGACCGCGAGCGTGCCAAGCGGCTTCAGCAGCTAGCGGAGCGGTGGCGGCGGCCCCCCTCAGGACACCACCAGATTCCCCTCTTCCCGCGGCCTCGCCATGGCGACCCACGGACAGACTTGCGCGCGTCGATCGGATCAATCACTTTTCTAGAGGAAGTAGCAGTCCCTCTTGTGAGAGCGCAAGGTCATTACTTGTGCTCCTAAGGGCGTGGACGTGCTTTGTGGAATGA
474343	SPIN2B	1257;1257;1257;1257;1257	274.293556085919;219.293556085919;274.293556085919;219.293556085919;222.293556085919	309;254;309;254;257	NM_001282461;NM_001282462;NM_001006681;NM_001006683;NM_001006682	GACTGCCGCGGCGACAGCAGGGACTGGTGGAATCCCGATGTGGCTGAGGGGCCGCCACCGCCAGCAGGGAGGCGGAGGGCTAGCGAGCCAAGCGGTGGGGACGCCGCTGCCTTCCTCTTTGCCTGTCTCGCCGCCCTCCTAGACACGCTCCTCATCTACGGATCCTACCCTCCCCGCTCTTGCAAGCATTCACTCGGCCGGTCGCCTGCTGACCCTCCTTCGCCACAGGCTCGTAGCGGAGGCAGCAGCGAGGTGTCCGATTTGGGCACGTGAGGCCCGCGATCCCCGGCGGTGGACGCCAGGCAGGGC;GACTGCCGCGGCGACAGCAGGGACTGGTGGAATCCCGATGTGGCTGAGGGGCCGCCACCGCCAGCAGGGAGGCGGAGGGCTAGCGAGCC…
55722	CEP72	209	16.306220095694	18	NM_018140	GAGGGCTCCGTTTGAAAC
26127	FGFR1OP2	373	242.828418230563	247	NM_001171887	GGGAGCGCCGGTCGGAGGCGGTCGGCGGAGGTGTCTACCCCGCCGGTGATGGCGTTGAACGCCACTGGCTTCCCGGCCTTCCGTCCGCTGCCTCCGTCCGATTCTGCGTCTGCTTGCTGAGGAGGCGGATTAGGGGGGCGCGGAGTCTCTTCCCTTGAGTGCATAGGTCCCGGTTGGTAGAGGGTTTGAGTCCGCATCGCCACAGCTGAAGGCTGCGAGGGACTAAGAGCAGAATATATCTTTAGAA
10438	C1D	844	49.662322274882	50	NM_173177	GCCCGACCGCTTTCCGGGAGACTGGAGTCGAAGGCCGTGAGTCAGCCATA
3298	HSF2	213	72.042253521127	78	NM_001135564	GGAGCTGCTGCCGTAGCTGCCGCCGCCGCTACCACCGCGTTCGGGTGTAGAATTTGGAATCCCTGCGCCGCGTTAACA
50814	NSDHL	866	214.364896073903	213	NM_001129765	GGCTCACGCGGGAGGGGAGTAAAGGGTGGCGGTCCGGGCCTGGAGTTCAGTGGGTGCAGCCTGCTTGCGAGCTGAGGCCAGACAGGGGGGCGCCTACGGACGGATAAGGAGGAGCATTCCAGGCCGAGACGCCCTCATCAGCAGAGTCACAGGAGTTTTGGAAGTGAGAGAAAAGAAAAGTTGATTACAAACGGGACCATATTTTGCTTCGAA
79714	CCDC51	627	390.637958532695	387	NM_001256965	ACCGTAGGAGGGGTACTTAACCGGACGGCCTACCAGGCCTGTGGCCGTGCGCGGGAAGAGCACTGCAGCCCAGGCCCAAGCCAGCCCGGAGAGAAAAGACCTGAGGAGGTGGCCCTGGGGCTGCACCACCGCCTCCCAGCACTGGGAAGAGCCCTGGGGCACAGCATTCAGCAACGAGCGACCTCCACAGCCAAGACTTGGTGGGACAGATATGAAGAGTTTGTTGGACTCAACGAGGTTCGAGAGGCCCAGGGAAAGGTGACAGAGCTCACACCCCAGTGACCTCTTCTGGGAATGCCTCGCTGGGAATGCAGCTGAGCCTGTGTGGGTGTGGAGAGAAGGTGCAGATGGCCTCCGGTTTTCTCTTTGCAGGCTGAGAAAGTGTTC
7026	NR2F2	1153	633.539462272333	657	NM_021005	CCGATCTCCTAGTCCTCCTGATTTCGATGGCTTTCCTGAATGGCTGACTGTGGGCTGCCCTGGACTTGGCCCCCGGACAGTCGCCTCTCCTCCTCCTCTACCTCCTCCTTCACCACCACCTCCTCTTCCTCCTCCTCCTCCTCCTCCTCCTCCGCCAACTCCTCGGCTGCACACCAGCTCTAAGAGCGAGAGTGAACGAGAGAGGGAGGGAGAGAGTGAGAGCGAGCGAGATCTTTGGAGAGATTTTTTTTTTTGCCTCCTACTTCTGTCTTGAAGCCAGACAATCGACTTCAGCTCTCCCTCCCCTCCCTCTTTCTCCACGTTCTGCTCCCACTCGCTCTCCTGTCCCCTTCCCCTCCCCTCCCGGCGGAAAGCCCCCCGAAACCAACAAAGCTGAGC…
63922	CHTF18	126	30.31746031746	35	NM_022092	GAGGTTCGGAGCGGGAGCTCGGGCTCGCGGACGGT
201973	PRIMPOL	157	422.96178343949	425	NM_001300767	CAGCGCGGGATTCTGGAGGGAAATTGAGGGAGACTTGGAAACCGCGCCAGGCCCAACGGGTACCTAGAAGGGAGACAAAGCCAGGCCTGCTGCCCAGTTTGAGCTCTGGGAAGAAGAGGAGCAGGCCGGGACGCCCACCGAGGTATCCCAGAGGTGACAGAACTTGATCTGGGCCTGGAAGGGGAAGAATTCGGGAAAAGCAACGTGGGGCATTCCAGGACGTTCATGTATTTGCTTTGGAATGCAAAGTAGGAGATGGACAACGTATTTACCTTGTGACAACCTATGCTGAATTTTGGTTTTACTATAAATCCAGAAAAAATCTCTTACACTGCTATGAAGTTATTCCTGAAAATGCTGTGTGCAAGCTTTATTTTGATTTGGAATTTAACAAACCTG…
10956	OS9	3605	17.633564493759	15	NM_001261421	GAAGGGGAACGAAAG
55795	PCID2	91;91;83;91	46.252747252747;46.252747252747;627.855421686747;46.252747252747	40;40;621;40	NM_001127203;NM_001127202;NM_001258213;NM_018386	GAGGCGTAGGGGGTGGCGCTCTCCGTTCGGCGGCGCTCCC;GAGGCGTAGGGGGTGGCGCTCTCCGTTCGGCGGCGCTCCC;GAGGCGTAGGGGGTGGCGCTCTCCGTTCGGCGGCGCTCCCATGGCGCACATTACCATTAACCAGTACCTGCAGCAGGTGGGTCCTAGCCGGGGAGCGCGCGGCGGCGTGGTTGGCCCTCGGCGTGTTCCGTGTGTCCCCTCCTGCCTTGGACCCTCAGGCCTTTTCCTTTCCCGCCTCGCCACCCTTTTTCCGTTCGGGTCCCCGGCGGGCAGCCGCGCGAGCCGAACAGCGGCGGCCGGGACTCGGGAAGGCGGCCCGAGTTCTCCCCTGCAGGGCCGCCGTGGGGGCCGGGCGGTGTCCGTGGATCGCGGAGTCG…
90835	C16orf93	217	76.064516129032	69	NM_001195620	GAGCGCTGGCTGTCCTGGAACCTAGGCGGCGGGAGCCCGGGGCGCCTCGCGGCACGGAAGAGCGGCGAG
8349	HIST2H2BE	24994	41.0405697367368	42	NM_003528	ACTTCTTTTCTTGGCTAAGCCGCGTTTGTACTGTGTCTTACC
1287	COL4A5	1041	312.378482228626	319	NM_033380	GGCCTTGCACGGGGAAGAGAGGGAGGAAAGTAGATCTGTAGGAATTGAGTGAAGAAAAAGTTTGCAAGTCTGGACAGAAGGGAAAAGTTCTCCTGAGAGACCGGCTTTGGGGAGGGGAGGGGGGAAGGAAGAGTAGCTCCTTCTTCTTCTTCTTTTTTTTTTCTTCCACTCTTAAAAAGCTTCTTTCTCTTCACCCAAGCCTCACTGTCCCTCTCCGGCTCTAGCTCTCTCCATATAAACCCTCAAGATTATGTCAATTGGTTAGAGCCAGCCGGGAATTTCGTGCGGGTGCTGAAGGAGCTGCGGGAGCCGGAGAAGA
9694	EMC2	235	32.8808510638298	32	NM_014673	CTCTCACCCCGCTGCCTCTAGGTTCTGGGAAG
27018	NGFRAP1	12854;95	191.246226855454;93.4105263157895	201;120	NM_206917;NM_001282674	GCTGCAGAGCGACGCAGCCTTCGGTGCAGTCGTCACTCGCGTCTGGCTACCAGCTCCCCGCTGCCCTGAGCTCGGCGGGCTGGCATTCGGCCCGGGGAAAAGCGGAGCAGGTCTGCGAGGCTAAGTGTCTCCGCGGCGCACCTCGCGGCGAGAATCCGGAGGAGAAGGAGACTGCAAGGATAGGCCCAGGAAAACGAAGAG;AGAGCAGTGATGCCACTTGTGGGCCCTCAGATTGGAGAGGACCGAGAAGAGTGACAGGGCTGTGCGCTCTGGGGCACCTCATGCAGACGGGAGTAGGGAGGCTGTTTTTTGCGCGTGCAT
8724	SNX3	1099	36.09008189263	24	NM_003795	GGCGGCGGCAGCAGCTACAGCGAA
7832	BTG2	144	91.2708333333333	91	NM_006763	GGCAGAGCCCGAGCAGCGGCCAGGGTAACGCTGTCTTGTGGACCCGCACTTCCCACCCGAGACCTCTCACTGAGCCCGAGCCGCGCGCGAC
79089	TMUB2	707	625.315417256011	633	NM_177441	GGGGTGTGGACGGTTTGTGACCCCCTTAGCCGACCCTACTCCTCACTGGCCGGGACAACTGGTCTTATCACGGAGGCTGGGGCCAGGCAGCCCTTCGGTTCGGGTGGGCCCATGGACCCCAGTCCAACGCCGAGGGAATAGGACCATCCAAAAGCGGAACCTTCGCCTCAGAAAAAGGGTGCGGGACCCCTCCTCACCGTGCGGTCACGGTACGGACAGGGTAGATCACAGGCTGAGGGACAGAGCAAAGACCCCTGAGGCCGGACACCTGGGGTCCTGCCGGGCCCCTCCCCACGAGAGTTCCCTGTGTCTGTGCCAATCGTTTTCGTCTTTCTTTGCCGCAGTTTCTTTTCCTGTAAATCATGGTTAATAACATTAACCTTCTTACCATCAGGGGTT…
11102	RPP14	882	379.706349206349	411	NM_001098783	ACGCTTCGTGGGGCGGGACGAGGAGAAGCCAAACGTAAAGACACCAGGAGTTTCTCGGGCCCAGCTGTGGCTGCTGCCGGGGAGCCCCAAGCCTTGGCGGGTCCTTGCGGCGAATAGGAGTCTGGTCAGGCGTCAGGCTAGTCCGACGAAGAGTGGGTAGGTGGAAGCCTTCCAAAGAGCGGCGGTTGTCTGGGAGCCGTCTCAGTTGGCCGCGACCCGGGCGCATGCGCGGGGCGGGCGGTGCGCCTTGGGTAGCTTGTCCTCTCCGACCCCGGGCGCTGAGGGCCTCTGTACGGCGCCGCGTAGGGTCTCGGCCGCAGAACGTGGCCGAGAGGCCCGGGCGAGACTTCGGGACCGTGTCCTGAGCGCTCTCCATGCGCCCGGCGCGAGGTGTGATCA…
23178	PASK	77;77;77;64	125;125;125;132	125;125;125;132	NM_015148;NM_001252122;NM_001252119;NM_001252120	GCGATTGGTCGGTGGGATAAAAGCGCGGAAGGGCTCCTTTCCGTGGTGTGTAGCCGGCTTGGCGTGACCCTCGCCTGATCCAGTTGTTAGAGTTGGAAGCTTGGCAGTTGGCCTCCCTTCTTCCC;GCGATTGGTCGGTGGGATAAAAGCGCGGAAGGGCTCCTTTCCGTGGTGTGTAGCCGGCTTGGCGTGACCCTCGCCTGATCCAGTTGTTAGAGTTGGAAGCTTGGCAGTTGGCCTCCCTTCTTCCC;GCGATTGGTCGGTGGGATAAAAGCGCGGAAGGGCTCCTTTCCGTGGTGTGTAGCCGGCTTGGCGTGACCCTCGCCTGATCCAGTTGTTAGAGTTGGAAGCTTGGCAGTTGGCCTCCCTTCTTCCC;GCGAGTCGGGAGGAAACCGCA…
10787	NCKAP1	197	48.791878172589	36	NM_013436	GAGGCGGCCGGCGGCGGCGGCGGCACCAGCACCACC
124944	C17orf49	743	77.347240915209	73	NM_001142798	CTCCCTGCTCTCCGTGGTCCCGGCTCGCGTGTAGCGGCGGCGGCGGCGTCTCCGTGAGGAGGCGCGCGGGGCC
9719	ADAMTSL2	79	260	260	NM_001145320	TGCTGGGATTATAGGCATGAGCCACTGCGCCTGGCCAACAATCCCCTTCTAAAGGCAGGTGGTGTCTCCAGCACCAGGGCCATACGGCTGCAACACCCCTACAAGTGCCGGGTCTGCCAGACAACCACGACCAACTAGTCCCAGATAACCTTGAGGCCTGGGCACTGGCTGGGCCCCGAGGGCTCTTCCCAAAGCGTACCCTGGTCATCTGGAAGAGGATCGGAGCTGGCCTGGTGGTGACAGTGGCCTTGCTTCCTAGG
221477	C6orf89	2149	455.48627268497	434	NM_001286637	GCCCGGCGGCAGCTGTCCCCGAGGCGGGAGGAGCCCGAGGGGCGCGAGCCCCGCATGAATCATTGTAGTCAATCATTTTCCAGTTCTCAGCCGCTCAGTTGTGATCAAGGGACACGTGGTTTCCGAACTGCCAGCTCAGAATAGGAAAATAACTTGGGATTTTATATTGGAAGACATGGATCTTGCTGCCAACGAGATCAGCATTTATGACAAACTTTCAGAGACTGTTGATTTGGTGAGACAGACCGGCCATCAGTGTGGCATGTCAGAGAAGGCAATTGAAAAATTTATCAGACAGCTGCTGGAAAAGAATGAACCTCAGAGACCCCCCCCGCAGTATCCTCTCCTTATAGTTGTGTATAAGCCCATTAGCACCTGAGCCAGTGCTTTCTGGAGCTC…
4253	CTAGE5	80	87.6	87	NM_203354	AGAATCTGAAATCTTTCTCAAGGATATGAGGTGCCTGGTAGAACTTTATTTACATGTTAGGAAATTTTAACATGAGCTTTTCAAGAA
10735	STAG2	78	480.897435897436	475	NM_001042749	CTCCAAGTCGCCGAAGAGCGAACACCCCAAACAATCCCGAAGCGCCACCAAAAAAAAAAAAAAAAAAAAAAAAAAAAAAAAAAAAAAAAAGAAAAAAAACCCCGCCGGATCCGACCGCCACTTTCAAAACCCCCCACCGCTCTAGAACCGCGGGAGCTTCCGTCCCTGAGTAGAATTCGAGGGTGTAAAGAAGAGGAAGGGGAAAAATATCTTGTACCAGCCCAGGGGTGAAGAAGCCCCCGGCCTGAGAAAGAAGGAGGAGTGGGGGAGGCGAACAGTCTCGTTGCTGCCTCTGTGTACGCTGAGGGGGGAGGTGGCCACCGAGTACTAAATTCACTTGGGAATAAAAGAAAAACATAAGAAAATTATAAGAGAAAGGAATTGTCTTAGAAGAAAGAA…
280636	C11orf31	2154	89.158774373259	135	NM_170746	TCCTTTGAGAGAGGTTTCCGCTGTAGGAGCAGAGCTTCCGGGCTGCGCTCTTCGTTGCCCAGTTTCCGCTCAGTGGTCGCGTCTCCGCCCCCCACCCACCAGTCCCGCTGCATTCTCGGCCGGGCTCTAGGCGCC
4719	NDUFS1	1807	111.508024349751	98	NM_005006	GAGGCCGCCATATTGAATAAGCGACCCGGCCTCCTAGGGGGTCGTCGTGGTCCAGACAGTTTAGCAGAACAGCCTCCGCGGCTCCGGGGAGAAGCAAT
5884	RAD17	1134;1134;1134	315.537037037037;556.537037037037;452.537037037037	322;563;459	NM_133344;NM_133338;NM_133342	GCCGACCAGTCTGGAAGGTCCCCGGGAGGCCGTACCTCCGAGAGGCTCGGCGTTGAGCCCGGGTAGGGCCAGGTGGCTGCCCTTTCACCTAGGGTAGTCCCTGGTCGCCTCCGCTCTTCGCCTAAAAGGGGATGCAGCTCCGGGAAATATATGGGAGTCCACATTTATGTAAGAAATGAAACTATAAAATGTATAAATAATTTGCAAATCAGAATTGCTGTCGAAAGTTTTACTATAATGAAAGATATTTTCATACTCTCAAAAATATAGAGGAAAGGGGCCAAGATTATAGTACCAGTCACAATCTTTTGATGAGGACGAA;GCCGACCAGTCTGGAAGGTCCCCGGGAGGCCGTACCTCCGAGAGGCTCGGCGTTGAGCCCGGGTAGGGCCAGGTGG…
9688	NUP93	917	91.059978189749	80	NM_014669	GGCGCGAGAAGCGGCGGCCGCGTCCTCAAGCCGGCACCTGAGCGGCGGAGACGGCTGTAGCACAAGGATCTGCATCTCCA
55177	RMDN3	1859	170.145239376009	179	NM_018145	ACGGTCACTGACAGCGTGAGCCCGCGGCGGCTGCTGCCATGGTGGCTGGCGGCCGGGTAAGGGTCTGAGTGGATCTCCTGCCAGGCCAGAGCGCCTTCGGGGGCCGCGGCGGAAGGCCAGGAGTTTGCAGCCAGGGCGCCGGGTTTGTGGTCTGCAGTGTCGTGAGGCTGAGGTGCAGC
55781	RIOK2	338	82.079881656805	100	NM_001159749	GCCATCTGGCGCTGTAAAGCGCTTAGAGGCTGGAATAACGACCTGCCTTACGCTTTGCGGCTGTCGTCGGAGAGGCATCTGGGTTCGGACTGGGGCCGCC
107	ADCY1	85	243.023529411765	236	NM_001281768	GGGGTTCCGCCGGGGCCGCTGGGGGGCCAGCGACCGCCGAACAAGGGGTTTGGCAGCTCCTTTTGGTCACCTTCGTGTCCTATGCCTTGCTGCCCGTGCGCAGCCTGCTGGCCATAGGCTTTGGGCTCGTGGTGGCTGCGTCGCACTTGCTGGTCACAGCCACCTTGGTCCCCGCCAAGCGCCCACGTCTCTGGAGGACGCTCGGTGCCAATGCCTTGCTCTTCGTCGGTGTGAAC
4924	NUCB1	388	96.317010309278	105	NM_006184	GTGGATAAGTGGGCGTGGTCTAGGGGGGAAGTCACCAAGAACGCACCGGAGGTCCTTGCCCGCCCTGGAAAACGCCCTCTGCGGTGAAGGAGAGACCACACTGCC
353091	RAET1G	51	130.705882352941	133	NM_001001788	GGAGTGCTAGAGTTTAGGGCTTACTGGAGTTTAGGGCTGCATTCAGACGGGCTGCATTCAGACAGCCTGCGAGCCGCCAGGTGATCCACGGGCTGGGCTTCGCTTCTGCTGTCCCCTGCGATCCAACTCCCCA
5127	CDK16	1172	425.413822525597	527	NM_033018	GCCCTTTATTCTTGCTCGGCCTCGCCACAGAGAGCAAATCAGATTGGCTGGGCGACAACCTCAAAGGGCGGGGCTGCACACGTTCACTACGGGAATGAGGTAGCGGTGGAGGGGGCAGTTGGGCGGGGATAGGCCGTCCTAGCTAAGGTGGTAAAGGCCAATAACTCTTCAGGCTGCCTCTCCTCGAAAAGTCATCTTCTCGCGAACCTTTAAAATGCCTTCCTCCCCAAGCACCTCAAGGGACTAGAACTGAGTGCTTCATTTGTCTTTTTTCCTCCTTGCAAAAGTCCCGTTTGCCACCATGGGGATGTACCAAGTGAGACCGAGTAGGGGGAACGAGTGGTGATTGACGCGCCAGGTTACTGGCCACTGCTCACCTAGGCGCTAGCAAACTTCTGC…
2530	FUT8	700;700	331.77857142857;419.83857142857	356;454	NM_178156;NM_178155	GACTACTTTGTGTGCTGGGGCGGCGCGCTCCGGTCCTCCCGCTCAGCTGGCGGTCTGGGCTGCTCTGGGGCAGCCCTTCGGTCCACTGCTCTGCATCGCGGGCGCCGGGAATTTTCCGAGTCCGAGCGGCATGTAGAGCGCATGAAGTACAGGACAATAAAGCTTCCTACACATATCACCAGGAGGATCTCTTTGAAAGATTCACTGCAGGACTACCAGAGAGAATAATTTGTCTGAAGCATCATGTGTTGAAACAACAGAAGTCTATTCACCTGTGCACTAACTAGAAACAGAGTTACAATGTTTTCAATTCTTTGAGCTCCAGGACTCCAGGGAAGTGAGTTGAAAATCTGAAA;GACTACTTTGTGTGCTGGGGCGGCGCGCTCCGGTCCTCCCGC…
5359	PLSCR1	2373	217.784239359461	201	NM_021105	AGGAAACGAAACCAGGAGCCGCGGGTGTTGGCGCAAAGGTTACTCCCAGACCCTTTTCCGGCTGACTTCTGAGAAGGTTGCGCAGCAGCTGTGCCCGGCAGTCTAGAGGCGCAGAAGAGGAAGCCATCGCCTGGCCCCGGCTCTCTGGACCTTGTCTCGCTCGGGAGCGGAAACAGCGGCAGCCAGAGAACTGTTTTAATC
619208	FAM229B	103	474.47572815534	476	NM_001033564	CACCGACTGGGTCATGGTGGTGCGCCGCCGGCTCCGGGAGCTTGCTAGCCCGCGGCCGCTTCTGCATTCCCCCAGCAACGGCGCTCTGCTAGAGAGCTGCCGTAAGTCACGCTACTGCCGCAAGCCTCTGCCGTCGCTAAGCACGTCTGTAGGTTCAGGCTAAGGTTTTCCGTCAGAAGGCCGCGCAAGTGCACTTGCGTGTCACCGTTACCGTAGCGACTGGGCTTCTGGACTGTATATCCTAGCTGCCTTGTCAACATCTTCGAGCATCGGCAGCTCCGGAGGCCGGGGTAACTGGCAGCAGGTAGGAAACTATGTGAAAGAATCTCCTGATGTCATAATTTCCGGGTGTCACCGGAACATTTGATCATCATTCCTTTGGCAATTCCAGCCTTCTGT…
516	ATP5G1	1191	43.4139378673384	31	NM_001002027	GACCAAGGGCTAAAGCTGGGAGACTGAAAAA
8405	SPOP	932;932	422.142703862661;370.142703862661	424;372	NM_001007226;NM_003563	GTCGACGTGCTGACGCCATGACGCCCCGGCTGGTGTGTGTCGGTGTGTATGTGTGTGTGTGAGTGTGCGCGCTCCGAGTGTGTGTGTATTTGTGTATCGGCGGTCCCGCAGGTCCCGGATGTTGCGGACAGTATGAGGCAAGCGCAGGGGGACGGGGACCAGCAGCTGTCGCCGCCGCTCTCAGATCGAGTCTTGCTCTGTCACCCAGGCTGGAGTGCAGTGGCGCGATCTCAGCTCACTGCCACCTTTGCCTCCTGGGTTCAAGCGATTCTTCTGCCTCAGCCTCCCGAGTAGCTGGGATTACAGGCTCTGGGAACCACCCTTCTACTTTCTGTCTCTAGGAATTTCACTACTCTAGGGTGAAGAGGGAACAGAAATCTTTGCCCCCTGACTTTGGAA…
55672	NBPF1	1506	728.636786188579	741	NM_017940	GAGGCAATCTGAAGGCAAATCCTGTTTAGACCCAGGCGAAGGTTCCCGGTGACCCGGGCTCTCACCAGCCAATTGTCCCTTGCCGTCCTCCTGAGGGTGCCTGGAGCTTAAGCACTGTGTGCTCTTGGCCTCCACACTGGGGATGCCGCTGACTCCCACTGTCCAGGGCTTCCAGTGGATTCTCCGAGGCCCTGATGTAGAAACTTCCCCATTGGGTGCACCAAGAGCAGCCTCACATGGTGTGGGCTGACATCAAGAGCTGCCAGATCCAACAGATGGCCAATCTTTCCTAAGCTGCTCACCTTACAAGAAAACGAATCGTACTGCTAAGAATTCAAACTTCAGCAGTCATGGGGAGCCTTGGAAGGAGCCCGAATCACTGATGGAATTGGACAGTGC…
23480	SEC61G	106	84.5754716981132	84	NM_014302	GGATTCCGGTTCCGGTGGGCCTCCATCAGCAAGCTCCAGTGCTACGTGTCCCTGGCATTTTAGGTGTCGGTTGGGTAGGCAGTC
140461	ASB8	225	98.853333333333	84	NM_024095	GGGTCACGCCTTGACAGCGGCTTTCAACCCCCACCTCAGCCCAGCAATTCGGCAGTTTGGAGCATGTGAACACCTTGAGCCTTG
10436	EMG1	2657	11.740308618743	8	NM_006331	GTTGCAAG
1728	NQO1	4946	122.348766680146	123	NM_001286137	ACACACGCGACTCCCACAAGGTTGCAGCCGGAGCCGCCCAGCTCACCGAGAGCCTAGTTCCGGCCAGGGTCGCCCCGGCAACCACGAGCCCAGCCAATCAGCGCCCCGGACTGCACCAGAGCC
9861	PSMD6	24550;24550	56.877963340122;56.877963340122	56;56	NM_014814;NM_001271779	GCCGCAGCCGGTCGTAACCAAGTTGTGTCCTGTCAGCCGCTGTCCCCTTCGCCGCG;GCCGCAGCCGGTCGTAACCAAGTTGTGTCCTGTCAGCCGCTGTCCCCTTCGCCGCG
11331	PHB2	203	144.256157635468	136	NM_001144831	CTTCCGCTGCCCTTTCTTTCGCCAGCCTTACGGGCCCGAACCCTCGTGTGAAGGGTGCAGTACCTAAGCCGGAGCGGGGTAGAGGCGGGCCGGCACCCCCTTCTGACCTCCAGTGCCGCCGGCCTCAAGATCAGAC
65991	FUNDC2	288	136.9375	143	NM_023934	GCGCACGCGCATCTCGGTGCATCTGTTGGGCGGGACCGCGGGGCCTGTGACACCGCACGCTGAGCTCTGTGATGTAGCCGCTTGCGGAGACTGCAAGCAGCCGCGGCGCGCCCGGCCCTCCCTCTTCCGCTGCCGCCGTGGGA
57156	TMEM63C	60	160.75	163	NM_020431	CAGGTGGGGAGCGTGGAGCCTGTCACTGCAGCCTGGCGGCCTGAGCGCCGAGCCTGGGGCTGGGGCCGCGGTGCTGAGGACGCAAATCAGCCCCGTAGCTGGGTGGAGCCTCCGGGCCTGACGTGGACCTTCACTGGAGAAGTGACTCAGGGATCCTCCCAGG
51720	UIMC1	51	170	170	NM_016290	GCCGAAGTCGGGGGTGGGTCCCTCCGGACGCCGAAGTGGGCTCGGGATGCGGGGCTGGGACCCTCCCGATTCCGGGGCGGATTCCGGACGCCGGGACCGGCCATTACTGGTGCCGGGTTGGGCTTCTCCAGATGCCGGGGCTGGGTCCTTCCCAAGGTTGAGACAAAAGG
10457	GPNMB	291	53.216494845361	50	NM_001005340	AGAGGAATTCAGAGTTAAACCTTGAGTGCCTGCGTCCGTGAGAATTCAGC
8078	USP5	16565;16565	30.539812858436;30.539812858436	9;9	NM_003481;NM_001098536	GCCGGTGTC;GCCGGTGTC
55536	CDCA7L	517	80.555125725338	95	NM_018719	GCTCGGGCGCGGGGCGTTCTTGGTGCGCCGGGCCGTGGTGAGTCCGGGCTCCCGTGGCCGCGTGCTGGGAGGAGACTGGAGCCCGGTTAGGAAGA
23484	LEPROTL1	1434	89.4497907949791	105	NM_015344	GCACTTCCGGGTGTTGTCTGGCCGCCGTAGCGCGTCTTGGGTCTCCCGGCTGCCGCTGCTGCCGCCGCCGCCTCGGGTCGTGGAGCCAGGAGCGACGTCACCGCC
8898	MTMR2	65	557.661538461538	556	NM_201278	GGGGGAACATGGCCGCTTCCGGTCTCCCTCCCGGGCCGGCGCTGGCCTGACTGCGGCCCCGGTCCGTAGCACTCCGCCCTCCGCTTCTCCCGCCCTGTAGCCGCGAAGACTGCTTCAGCCTTTCCCTGTGCTGCCCCTGCCGCGCGATGGAGAAGAGCTCGAGCTGCGAGAGTCTTGGCTCCCAGCCGGCGGCGGCTCGGCCGCCCAGCGTGGACTCCTTGTCCAGTTAATGTGTTAAGAGCCATTGACATTTGAAGATCATCAGAAGTGAAGATAAAACATCTCAAAAATTATAATTGCCTCCACTTCTCATTCAGAGAATTCAGTGCATACAAAATCAGCTTCTGTTGTATCATCAGATTCCATTTCAACTTCTGCCGACAACTTTTCTCCTGATTT…
22	ABCB7	366	13.306010928962	10	NM_001271697	CTCGCTCAAG
8943	AP3D1	55	29	29	NM_001261826	CCCGAGGCAAAAGCCCGTGGGCCGCCGCG
56128	PCDHB8	1236	191.847896440129	159	NM_019120	GGGGAGCTTGGATGCCAAAGGGAGGACGGCTGGGTCCTCTGGAGAGGACTACTCACTGGCATATTTCTGAGGTATCTGTAGAAAACCACAGCCTCAGATACTGGGGACTTTACAGTCCCACAGAACCGTCCTCCCAGGAAGCTGAATTCAGCAAGAACA
79017	GGCT	6119	111.463474423926	120	NM_001199815	CCCCTAACCCTGAGGCTGCCGCGCGGCGGTCACTGCGCCGGGGTAGTGGGCCCCAGTGTTGCGCTCTCTGGCCGTTCCTTACACTCTGCTTCAGGCTCCAGTGCAGGGGCGTAGTGGGAT
55860	ACTR10	4076	70.541952894995	64	NM_018477	GCGAGCGCCGAGACTTGTTGGCCGCGGAGACTGCGACCCTCTTCTCTCAGTCTGCCTTACTACC
7818	DAP3	8523	155.489968321014	160	NM_033657	GCAGTCTCAGGACGGGCGCTTTGGAGCCGGCCCCAGGCAGCGTGTGTCGGTCGCCTAGTCTGGAGAACTAGTCCTCGACTCACGGTGAGGGAATGGACCGACACGGGTATTGTACCGCTGAGGGAAAGGAGCGGGACTCCGGACCTCCAGGAGTGCAAGG
51082	POLR1D	5208;5208	107.20410906298;107.20410906298	109;109	NM_152705;NM_015972	GCCTTCCGTCGGTCGGTCCTTGCTTCCTGCTTCGCCTCCGCGCCTCGCGCTATGGGACAGAGCCCCCGATCCGCCAGCACCACCTGAGGATCCAGAAACCGCCCCAGCG;GCCTTCCGTCGGTCGGTCCTTGCTTCCTGCTTCGCCTCCGCGCCTCGCGCTATGGGACAGAGCCCCCGATCCGCCAGCACCACCTGAGGATCCAGAAACCGCCCCAGCG
728239	MAGED4	1493	121.906898861353	127	NM_001272063	GGGGTGGTCCGGGCTGCTGTGCTGGCAGCAGTAGGCGAGGGCGCGGCTGCGGGGTTCCTGGTGCTGAGGACGGACGCCATTGGAGTTCCCGAGAAGGCTGAGCTCTCATCTCCCTGGGACCCGCAGC
6635	SNRPE	1928	44.6825726141079	33	NM_003094	AGCGTGCGGGTGTGCTCTTTGTGAAATTCCACC
126070	ZNF440	77	165.818181818182	168	NM_152357	GTCCATTCCTTTAGTGCTGCGCCGACAGCGGTCAGGATCTCGGCTTTCTTGCTTCGAGAGGGACTAGGTGCCTCCACCAGAGCTTCTGTCGCTCTGTAACCTGCACTGTGACCTACACTAGTCGCGGGAGCCACGCAGAGGACGCCGGAACACCCTGGAAGCCGAGAA
64708	COPS7B	1550	149.407096774194	178	NM_001282950	GAGTGCAGCGGTGGGAGGCTTCCGGGGGAGCTGCACGGGCGACGGGTCGGCGGAGACAGAAAAGCGCCGGACGCCGGGGTGATCATGGACGCTTGACAACCTGCGGGCAGGCGCCGGGAGGCCGAGCCAGCGACTAAGAGGACCGAGAGGTGGCGTGGACAGATTTCAAGGCCAGAGA
9100	USP10	52768	86.859422377198	87	NM_005153	GTGTATGTGCGGGCGAGAAGATGGCGGCGGCGGGGGAAGCAGCGTGAGCAGCCGGAGGATCGCGGAGTCCCAATGAAACGGGCAGCC
10458	BAIAP2	570	106.715789473684	104	NM_001144888	GTGGTTCGGGTCCGCTTTCGTCTCCGTCCTGCTGCCGTTACCGCCGCTGCTGCCGCCGCTTGCGTCCCCCGCTCCGGTCTGTGGTGCAGCCGGGACCCAGGACC
9555	H2AFY	970	122.480412371134	121	NM_138609	GAGGAGCGCGGAGAGAAAAGGCGCGAGCGGCCAGGAGGGCTCAGGCCGAGACACCTTGCAGCTGCCGCCGCCGCCACCGAGCCGCCGCTGTGCTCACTGATCCGCCTCCAGGGCCACCGCC
374882	TMEM205	10982;10864	250.503460207612;132.225055228277	251;132	NM_033408;NM_001145416	GGCCGAGGAGGGTCGCTGTCCACCCGGGGGCGTGGGAGTGAGGTACCAGATTCAGCCCATTTGGCCCCGACGCCTCTGTTCTCGGAATCCGGGTGCTGCGGATTGAGGTCCCGGTTCCTAACGGTGGGATCGGTGTCCTCGGGATGAGATTTGGCGTTTCCTCGGGGCTTTGGTGGGATCGGTGTCCTCAGGATGAGATTTAGGGTTTCCTCGGGGCTTTCGGGATCTTCACCTAATATCCGGACTGCAAG;GGCCGAGGAGGGTCGCTGTCCACCCGGGGGCGTGGGAGTGAGGTACCAGATTCAGCCCATTTGGCCCCGACGCCTCTGTTCTCGGAATCCGGGTGCTGCGGATTGAGGTCCCGGTTCCTAACGGACTGCAAG
83990	BRIP1	3688	252.041214750542	270	NM_032043	GGAATTCGTCTCGGGTTGTGTGGTTGAGGGGTCTGGTGGGTCGAGGAAAGGTAACGGCGGCCCCAGTCCTGCACACAAGGCCGGGGAAGTAGCAGCACCCCCAGGAAGAGGGAGGAGGAAGGGCTCGTGCCCTTTCTTCTCTTCCAGGGCTCCGCTTTATTTGCTCTCAGAAGTCGGTTTCCTTTCCTTTTCTTCAGTGAATCGGAGCTCAGAGCGTTGCTTCGGTTTCCCTCCAGACAGTTAGGAATCTGAAATAAACAGGAAAGCACT
57819	LSM2	639	90.71048513302	95	NM_021177	GCCCCACGCGCGGGCTCGCGCTTCGGTTTCCCCAGACCTGCTCGCAGCACCCTGCTGTCTTCCCGGTCCGGCCCGCTGCCCGCGGCGCCAGCACC
170680	PSORS1C2	253	73	73	NM_014069	CCCTATAAAGCCTCTTGGGGTTCCCAGGCACCCAGACTCAGCCCACCCCAGCTTTGGGGGCCAGTACATAGCC
64897	C12orf43	1388231	159.122652498035	159	NM_001286198	GTGCTGGGATTACAGGCGTGAGCCACCGCGCCCGGCCTTGACTCCATCTTAAAAGTGCATCTATCTGGAGTTCACCCACTTCTCACCACATCAATTACTGCAGCAGACTCCGTGTTCCTGCCTTTGCCCCAACAGTCTCACGCTGCACAGCAGCCAAAG
39	ACAT2	1123	45.823686553874	32	NM_005891	AGCGCAGGGCAGACGGCGGCAGGAGAAGCAAG
3550	IK	4913	75.852839405658	78	NM_006083	ACTGTGGGAAAGAGCTTGTCGCTGCGGTGTTGCTGTTGGAGACTCGATTGTTGGTGACAGCGAAAGAACGATAACAAA
9895	TECPR2	55	56	56	NM_014844	GATGACAAATAAACATTCCTTTTCCTGCGTGAAGATAGTCTGTGGAAACCTTGGCC
129401	NUP35	2065	528.572397094431	536	NM_001287585	TCCGCCATTTTTGAAAATTAATTGGGAAGGTACTGGTTTTAAGTGTAGTTGCCGACGCAATGGCAGCCTTTGCAGTGGAACCTCAGGGGCCCGCGTTAGGATCTGAACCAATGATGCTGGGTTCACCCACATCTCCAAAGCCAGGAGTTAATGCCCAGTTCTTACCTGGATTTTTAATGGGGGATTTGCCAGCTCCGGTGACTCCACAACCTCGATCAATTAGTGGCCCTTCAGTAGGAGTAATGGAAATGAGATCACCTTTACTTGCAGGTGGGTCACCACCACAACCAGTTGTACCAGCTCATAAAGATAAAAGTGGCGCTCCACCAGTTAGAAGTATATATGATGACATTTCTAGCCCAGGACTTGGATCAACACCTTTAACTTCAAGAAGACAGG…
54458	PRR13	25111	61.256501134961	51	NM_018457	GAACGCAGCAAGCCCAGGCGGCGGTGGAAAGGCTGGAGGACACACCTAAAC
151188	ARL6IP6	532	298.355263157895	28	NM_152522	CTCCGCGGGTTTCGTTGTGTTTCGCGCC
18	ABAT	3310	126.264954682779	101	NM_020686	GCATCCCGCAAGTCGGAACCCGGCGGATCGGATCCCGCAGATCGGAGACGGGGCCTGGAGGGTGGCAGCACGCAAAGGGTGTCCCTGTCCCTCAAGGGGTC
127687	C1orf122	83	567.915662650602	671	NM_001142726	ACCTGTAGACGTCGGCCACGCGGCCGAGGCATACGGCCAGAGGCTTGGCCTCGCTGCGACCCTTGAGGCGGTACACAGCGCGCAGAGCCGCCGAGCAGCTCGCCGCGCAGGCCAGGCCGTACAGCGTATCGGTGGGGACGGCCACCACGGCGCCGGCGCGCAGCTCGGCCACGGCGGCCCGCAGCGCCTCGGTCCAGCCGGCGCGCTCCGGGCTCGCGGCCTGCACGGCCCCGCTCCCCGGGAGCCGCAACAGCCGGGCGCCGGGGGCCGCCGGAGCGGGACTCGGCGGGCGGAAGAGGCGACCGCTCCGGGAGCCAGCAGGCCCCTCGCTCAACCCCACGCTGGCAGCCACCGCGGCCCTCATCCCCCTGCACCGACGCGCCGGAGACATCCGCCCAG…
57120	GOPC	918	223.216775599129	229	NM_020399	GGAGGTGGGACTGACTGAGTCTTCCGTGTGTCGCCGCCGTTGCCGCCTCAGCTTCAGCCTCGTTACTCCTGCGGTTCTGTGACTGTGCTGCTGGCGTTAACGGCGCGAGGTGAAGGGAGGTGACGGAGTGTGCCCGCGCGCGCGGGGGTCCCCTCAGTCCCAGCAGTTCCCTTCGTGCGCGGGGGGCGGCGAGGGTCTTCAGCAGTCGGGAGAGGCCCTTGACGGCGCC
64968	MRPS6	1973	103.276229092752	123	NM_032476	GCTTTCGCCGCCTGGGAGCCGTCCGGCGCAGCAGTTTCTAGGTCCCCACTGTCCCCGCCGTCCCGCCCCTTCGCGTCCCGGGAACCGGCTGGCTTCCGAGCCGCACTCGCCGATCCTCCAGGC
51374	ATRAID	14895	336.58690835851	335	NM_016085	GGAGCACCAAGGGAACGGAAAATGGCGCCTCACGACCCGGGTAGTCTTACGACCCTGGTGCCCTGGGCTGCCGCCCTGCTCCTCGCTCTGGGCGTGGAAAGGGCTCTGGCGCTACCCGAGGTACAGAAGCAAGTTTGAGGTCGGGCTGAAGCAGGGTCGCTGGCCAGCCGTGCGTCGCGCTCGCCAGCGGCTCCCCCTTCTCCTCGGCGGGCCTGCGGTTCTGATTTCGTCCCTGACGCTTCCCGACCCTGCCCAGCCAGATATGCACCCAATGTCCAGGGAGCGTGCAAAATTTGTCAAAAGTGGCCTTTTATTGTAAAACGACACGAGAGCTA
8417	STX7	374	158.647058823529	157	NM_003569	CCCCACGCCACCGCCCATCAGCTGAGAATTGCAGCTGAGGGCTCCGGGGTAGGTGGGTGACGGCGGTCGGAGGTGTAGGAGGGAGCCGTGGAGGTCCAGGTGACTGCTTAGAAAACTGCACAGCATCTGATGAAATTAGCGAATAAGAACATCAACC
2140	EYA3	245	187.077551020408	189	NM_001990	TCCGGTTCCTAGCGATGCGCATCCGGGTCACGCTAACGCCGCGGTTTCCTCCGCTCGATTGGTTCTACTGTGGGTCTGGACTGATCTCCATGTCCTGTTGTGGGGCTTTTACAGCCTTTGGATTGTGAAAACTGCTGAGAGAGACTTGCAATCCAGTCACATAAGTATAATAAAGAAATATTGGTCCTC
535	ATP6V0A1	976	128.988729508197	113	NM_001130021	GAGCCGCGGAGGGTGCGGGTTTGGCTGCGGTGGTTTCTGTGGCGGTTGCTGTGGCGGAGTTTGGAGGTTGGAGAGAAATCCAGGTACTCACTAGACTGGTACCTTCTGCCACC
51207	DUSP13	128	133.71875	110	NM_001007273	ATCCTGGAGCTGGAGGAGCTCCTGCGGGCAGGGAAGTCTTCTTGCAGCCGTGTGGACGAAGTTTGGCCCAACCTTTTCATAGGAGATGCAGCTGGTCCTTACTCCCTGCC
80279	CDK5RAP3	646;646;646	1023.19504643963;1652.19504643963;1652.19504643963	1043;1672;1672	NM_001278217;NM_001278216;NM_001278198	CACAACGCCACTGGATTGGTGGTAGGGCGGGGCGGGCCACAGTCTCCAGCCTGAAGCGGAAGTGGAGGAAAGATGGAGGACCATCAGCACGTGCCCATCGACATCCAGACCAGCAAGCTGCTCGATTGGCTGGTGGACAGAAGGCACTGCAGCCTGAAATGGCAGAGTCTGGTGCTGACGATCCGCGAGAAGATCAATGCTGCCATCCAGGACATGCCAGAGAGCGAAGAGATCGCCCAGCTGCTGTCTGGGTCCTACATTCACTACTTTCACTGCCTAAGAATCCTGGACCTTCTCAAAGGCACAGAGGCCTCCACGAAGAATATTTTTGGCCGATACTCTTCACAGCGGATGAAGGATTGGCAGGAGATTATAGCTCTGTATGAGAAGGACAACACC…
7407	VARS	86	228.43023255814	234	NM_006295	GGAAACGCTCCCTGTCACAAAGGGGGGAACACGTGGGCGCCGGCTGCCGGGGCGGCGATCTTAGGGAACTAGGGTCACCTGGAGAGCCGCCCACCGTCTCTGCCCGCTCGACTCCTCCGCCCGGGCCGCTCGGCCGGTCCAGCCGCGGCCGGCGCCTGGCTGTGAGGTGGATTCCCGGCCCAGTCTGACCATCTCCCTCCAGTTTTTCCACTTCGTTCGGACCTTCTCATAACT
25896	INTS7	355	96.261971830986	100	NM_001199812	GCGGAAGAAAAACCAGCAAGAAGGCGGCGGGGGAAGATGGCGGTCCTGGGGTAGAGTTTGCAAGCTTTCTGACTAGGCTAGTCGAGTAACTATTCGGGTC
2444	FRK	240	451	488	NM_002031	TGGTCGAAAGACAGGAACAGACTTGAAACAGGGGGAGAGCTCCTGGCGAAAGCAAGACGTGGAGGTTTTACCAGGGGTTAGTAGCTTCCTCTTGCTAACTTTTTATTGGGACAAAAGGCAAGATGGCACCATTCTGTTCTCAGATATTTGTCTAAATAAAGCCCTTTTAATTTTATTTTATTTTTGTTGTGGGATTCTTAAGCAGATAAGAAGAAAAGACACCTTCCTAGTGAGCAGCTGCCCAGCTCCTGCTCAGTTTTGCCTCGGGGTAGCACCTCCAGCCACAGAAAGCAAGCCGGTAAGTCTCTCCAGGTAGGACTTGCTGCAACCCAGCTGCTGGACTGATCTGAAACGGGACTTTGCATACTCTCCGAAGTATGGTGAGTTGGTGCTGACTTC…
7355	SLC35A2	746	74.961126005362	113	NM_001282649	CCCTGACGATCCCGGCTCTCGCTCCACCTTCACTCAGGTGGCCCGGCAGCGGAAGTGACGAACGCGGAAGTGGTTTTTCTGTTGCCGAGGGGACGGGCCGGGCAGATGCCAAC
5705	PSMC5	3571	53.651638196584	48	NM_002805	GCGCGCCAAGACGGCTCGGATGCCGGCGGTCTCTGCTGAAGAGAGAAG
23583	SMUG1	605	415.955371900826	415	NM_001243789	GAGGAAGTAGGGGGCTGGGAATCCGGGACTGTGGGGGCAAGTTGACGGCTCCCAGGGTCGTCGGGGCTGAGCCGAGAGGGTGGTTAGAATTTCTATATTTTGGGGTCCCTCCCTCCGTATGGGGTAAGACTCAGTGCAGGGAGAGCCCAGCCTATGAAACCGCCTGGGAGGTCTGCAGGATCAAGGCTTTCCAGTCGGCCGGAGCCAGCGGGCGCCCCCGGAGGCTGGAGTGCAATGGCGCGATCTCAGCTCACTGCAGCCTCCGCCTCCCGGGTTCAAGCGATTCTTCTGCCTCAGCCTCCCGAGTAGCAGATTATGAGCTTACAGAAAGCCTGGCCTACATTTTACTCTTTTTGGATTTCTTCCTCATCAAGAGACTGCTGCAGTGCCTGTCATGTG…
6603	SMARCD2	282	238.163120567376	258	NM_001098426	CTCCGGAGGCCGGGGACGGAAGGCGGGCCCGCAGCAGATCCTGGATCCGGAATCTCCCGGGCAGGAGCGGAATCTGTCCCGAACCGGGTCTGTGAGGAACTCGCGAACTTGGATTAGGAAATCCCGGAGCCCGGATCGACAAATCCCGGAACCCGGAATTAAGATCGCCAAGTCCCGGATCGCGGAGCACAGAGCACGGAGTGGACTCGACGCGGAGCCCGGAGTCCGGATCGCGGCACCGCGGGACGGGACGGAGCG
90589	ZNF625	287	165.689895470383	165	NM_145233	GACTCCCAGGCGTCTTGCACCAAAGGGAGGTCGGGATCTCGGTTTTCCGGCCCCGAGAGGGACCAGGTGCCTCCGCCATAGCTTCTGTCGCTCCATCGCCCGCACTGTGACTGGACTGTTAGAGGGATCCGTGGAGAGGAGGCCAGGACACCTGGAAGCCGGGAA
154743	C7orf60	459	22.028322440087	24	NM_152556	GGCGGCGGCGGCGGCGGCTGCGAT
388722	C1orf53	161	14.621118012422	15	NM_001024594	AAGGCCGGCGGCGGC
5905	RANGAP1	2060	244.666504854369	240	NM_002883	GCCGCGGTGCGGAGAGCAGGTGGTGCTGGAAGCGCGTGAGGCCGGGAGCTCGAGAGAGCTAACAGACTAGCCGGCTGGACATCTGGACCGCTGGATCCGGAGGTGGCGACCCCGGCCTGACCCGGACCCTAAATCCGTCCCCGCCCCAGAGGGCGGAGGCGCGCGCTCGATTCCCCCCACGCGGCGGCGCCGCCTGTTTACGTCTGCAGATCTCCAGGGGAGCCCACCAGCCTAGTCAAC
81563	C1orf21	647	320.797527047913	222	NM_030806	GGAGGAAGAAGAGGAGGAGGGAGGAAGAAAAAAGACGAGGAGGACAGGGGCGGGGGGCGGGAGGCTTGCCACCTTCAGCCCCCCCGCGAACGCCCAAGGTGCACACATCTTGACCAACTCAGCAGCAAGGTGGATTTTCTTTGTGTTTAAAGAAAAAAAATGTCCCTGTGTCTGTAGAGATGATTTGCAGTTCAGCCCGGCTGAAGCTGACCGAATGAGACT
25898	RCHY1	191	431.748691099476	436	NM_001278539	GAGGGGAGGTGGAGGAGATGGCGGCGACGGCCCGGGAAGATGGCGCCAGCGGTCAAGAGCGAGGTCAGCGGGGCTGCGAGCACTATGACAGAGGATGTCTCCTAAAGGTGACGCCTTCTATGGACTCTTCCCTGACAAGCTTCCGTCAGGCACCTTGCTGTGACAAGCTTTATACTTGCCGCTTGTGTCATGATAACAATGAAGATCATCAACTAGATCGCTTTAAAGTGAAGGAAGTGCAGTGCATAAACTGTGAAAAAATTCAACATGCCCAACAGACTTGTGAAGAATGTAGCACATTGTTTGGAGAATATTATTGCGATATATGCCATTTGTTTGACAAAGATAAGAAGCAGTATCACTGTGAAAACTGTGGAATTTGATTGGTCCAAAGGAAGA…
7621	ZNF70	194	345.829896907216	366	NM_021916	GCCCCGCCCCGGCCCAGGTGAGTGGCCCCGCGTCCGCCGGTGTGACCTGAGTCCGCCTGACCACCTGTCCCTCCGGTGGCCCTGGGTGTGCGTGTCCCCAATCGCGGGGAAGCCTGTAGGGGCGCCACGTCGCCGCCTGGGCAGCGTGTGCGGGTCCGTGGCAACTCTTGGGCCCCCAGCCAGGAAACCTTGACTGCACTAAGAGTTTGCAGGGTGCCCAGGCCCTAGGGACTCTCTGGAGGATGGGATGACAGATGCAGGAGGACCCGGAGAAGGCCCCGACAGAGATTGTGAGAACAGTAAGTGTGGCCCAAAGAAGAACATTTTTAAAGAAATACAACCATTGGGGATGATAGCAGATTCACA
662	BNIP1	3725	17.427651006711	15	NM_013980	GCCGGCGTCCCCAAC
130813	C2orf50	1406	331.197724039829	332	NM_182500	ACACACACACACACACACACACACACACACACACACACACGGGGCCCGCCCCTTTCCTAGGAGCTGTCCGTTCCCAGGACAACAGTCAACACAGCACAGGCGGGAGTTCAAAACGAAACTGGGCTCAAATGCTCTCCCCAGCCCGGAGAGCCCTGTCCCCATCGGCCACTCTGAGCTCGAGGCCTAAAGGGACAGTGAGGAGGACCCTGCCCAGGCTCTCCCGGGGTTAGGAGGGACAGAGTGTTCCAGGAGGAGGTTTGAGCTGAGCTCAGGCACAGGTCTCTCTCTCTCTCTCTCTGACACAAGCGCACACACACACACACACTTGCACC
5427	POLE2	356	22.171348314607	20	NM_001197330	GGTGGCGCCAAATCGCAAAT
10134	BCAP31	2079	239.084175084175	246	NM_005745	GGGGCCGGGGCTGCTGTGGGAGAGTTCTGTTGCTGCGGCGGGGCCTGCACGTTGACTGTGGGAAACTCGGTGAGCGGGCTCCGCGCGCCGGGCTGGGCTCCGGGACCGCGGAGGCTCCCCGGCCCATCGACGAGGGAGAGAGGCGAGCGGCGCGGGGAGGCCCGGGGGCCGGGGAATCTCGGGGCCCGCAGCCTACCTGCGTGAAACAAGCTCACATCTTCCTGTGGGAAACCTTCTAGCAACAGG
10622	POLR3G	461	191.479392624729	177	NM_006467	GCAGGTCGGTGCGCGCTTCTCCCGAGGTGGAACGGGCGGCAGTCAAGCGCCGGCGTTCTCTGCCGTCACCCTTTCCTTGCCGGCCGGCACTTCGGCTGCAGAGTTTTGCCCACGCTTCGAGACTTAGGGAGCAGTGCCTTTCAGAATTTGCCCACTCATCTGGTATAACTGGTTCTG
3178	HNRNPA1	8336	60.471569097889	62	NM_031157	TCCTTTCTGCCCGTGGACGCCGCCGAAGAAGCATCGTTAAAGTCTCTCTTCACCCTGCCGTC
2043	EPHA4	69	29	29	NM_004438	GGCAGGAGCAGCGTTGGCACCGGCGAACC
51385	ZNF589	329	66.2948328267477	66	NM_016089	GCATTCTAATCCGTTTCACACACGGTGCTGCTACCTCGTTTGCTTCGTGCGTGCGTGCGCGCGCAG
51529	ANAPC11	987;1085;1085	109.372847011145;236.242396313364;115.242396313364	106;235;114	NM_001002245;NM_001289419;NM_001002247	GAGACTCGGCGGGCGCTGTTGAGGGAGTCGGGCCGCGACTGTGGTCGTTTTTATACCTTCCCGCGCGGACGCCGGCGCTGCCAACGGAAGGGCGGGCTCTGCTGCC;GAGACTCGGCGGGCGCTGTTGAGGGAGTCGGGCCGCGACTGTGGTCGTTTTTATACCTTCCCGCGCGGACGCCGGCGCTGCCAACGGAAGGGCGGGTAGGGCGAGACGGAGTTTCGTCATGTTGGCCAGGCCCATTTGAGATCTTTGAAGATATCCTCAACGTGAGGCTCTGCTGCCATGAAGGTGAAGATTAAGTGCTGGAACGGCGTGGCCACTTGGCTCTGGGTGGCCAACG;GAGACTCGGCGGGCGCTGTTGAGGGAGTCGGGCCGCGACTGTGGTCGTTTTTATAC…
27236	ARFIP1	672;1315;672	122.982142857143;202.722433460076;122.982142857143	114;145;114	NM_014447;NM_001025593;NM_001287431	GGTTCTGGAGGCTGGGTTGAGAGGTCGCCGGTCCGACTGTCCTCGGCGGTTGGTCAGTGTGAATTTGTGACAGCTGCAGTTGCTCCCCGCCCCCGAGCAGCCGAGGAGTCTACC;GGTGCGTGGGGGAAGGGGAAGAAGGAAAAGGTCCGGGTCGCGTTTCCGCTCAGTTTTTGCCAGGGTTGAGGCGATTCCAGAGAGCGGCGGAAAGGATAAGCCTCGACTTAGAAGCTACCGAGTTACCCTAAGAAAGGAGTCTACC;GGTTCTGGAGGCTGGGTTGAGAGGTCGCCGGTCCGACTGTCCTCGGCGGTTGGTCAGTGTGAATTTGTGACAGCTGCAGTTGCTCCCCGCCCCCGAGCAGCCGAGGAGTCTACC
5970	RELA	1192	80.089765100671	81	NM_021975	TCCGCCTCTGGCGAATGGCTCGTCTGTAGTGCACGCCGCGGGCCCAGCTGCGACCCCGGCCCCGCCCCCGGGACCCCGGCC
56992	KIF15	326	63.779141104294	62	NM_020242	GGTGCAGTCGGGAGGTGGAGGCACCGGCTGCATTGTTTTCGGGATCGAGGGGTGAGGGCGCT
29104	N6AMT1	59	18.4406779661017	28	NM_013240	GCACGCGCATGGAACGCAGCGAAGGACT
65258	MPPE1	752	219.558510638298	234	NM_001242904	GGCTGGGTGCGCGCCGGCTCCGGCTGCAGTTCCCGGGTCCCTCGGCCACCGAAGCCACCCTGCCCTGGTGAAAGGGCTCCCGCACCGCCCGGTGCTCCCCATCTGCCTGGCGTTGTGCGCAGAGCTGGAAAGCATGGCTGTTGTGCCCAGCTAAGACCTGAATGCCATCACCCTCCCCAGGGCTCTGCAGTTTTCTCGTGGTGAACCCTTGATGGATTTGTTGTTGCTTGAGAA
9349	RPL23	183	59.169398907104	69	NM_000978	GGGGCGTTAAAGTTCATATCCCAGTGTCCTTTGAATCGACTTCCTTTTTTCTTTTTTCCGGCGTTCAAG
84622	ZNF594	109	123.174311926605	113	NM_032530	GGGGTCCAAGATGGTGGCGCTAGGAGCCGCGACCCAGTGATAGCGGCCGTGGAGGGGCCCCCGACCGAGCGGGAGGTTGGGGGTAGCCTGGAGATTCTGAAGACAGGAATAAG
4001	LMNB1	4606	356.235345201911	357	NM_005573	GAGGAAACAAAGTGCTGCGAGCAGGAGACGGCGGCGGCGCGAACCCTGCTGGGCCTCCAGTCACCCTCGTCTTGCATTTTCCCGCGTGCGTGTGTGAGTGGGTGTGTGTGTTTTCTTACAAAGGGTATTTCGCGATCGATCGATTGATTCGTAGTTCCCCCCCGCGCGCCTTTGCCCTTTGTGCTGTAATCGAGCTCCCGCCATCCCAGGTGCTTCTCCGTTCCTCTAAACGCCAGCGTCTGGACGTGAGCGCAGGTCGCCGGTTTGTGCCTTCGGTCCCCGCTTCGCCCCCTGCCGTCCCCTCCTTATCACGGTCCCGCTCGCGGCCTCGCCGCCCCGCTGTCTCCGCCGCCCGCC
3068	HDGF	701	27.902995720399	44	NM_004494	GCTTCCCGGCCCGGCGCGGAGCCCGGGGCGCCCGGAGCCCCGCC
440335	SMIM22	342	121.730994152047	137	NM_001253794	GGCCCTGGGGAGGGCGGGGCTGGTTGCCAAGGCCTCAGGTGGTGTGGAGCCGGAAGCAGGAAGCAGCCTGTGCTCCCCAGGACCTGCCTGGTTGGGGGAATTGGAGGCTTCTAGGAGGTGGCACGGTGCACGCCAAG
2547	XRCC6	2374;2831;2831	126.721566975569;105.341575415048;68.341575415048	120;92;55	NM_001288976;NM_001288978;NM_001288977	GTCGTCTTCTGTCCAAGTTGGTCGCTTCCCTGCGCCAAAGGTAAGCGGGCCGTTATCCATTTGTGTTGTTCGCCAGCTAGGCCTGGCCTCGTCCCGCTTCGCTCGTGAGCAGTAGCCAAC;GTCGTCTTCTGTCCAAGTTGGTCGCTTCCCTGCGCCAAAGTGAGCAGTAGCCAACATGTCAGGGTGGGAGTCATATTACAAAACCGAGGGCG;GTCGTCTTCTGTCCAAGTTGGTCGCTTCCCTGCGCCAAAGTGAGCAGTAGCCAAC
80237	ELL3	743	65.753701211305	67	NM_025165	ACAGAGGAGGTGGCGGTGGTGGCCCTCGCCTGTGGCCCCCGTGCTGCTTGCACTCGAACTCGTCGCC
55744	COA1	913	135.385542168675	138	NM_018224	TCCCCGCTGGCGCGCAGGACCGCGGGCATTTACCCGTGCTTTCCCAAGCCTGGAAGAACTCGTCATGCTCTTTGTAGCGTGGTGCTTCTGTTGCTCACAGGACAACTTGCCTTTGATGATTTTCAAGAGAGTTGTGCT
401563	C9orf139	60	1153	1153	NM_207511	GACTCAGCCGAGCACCGCGATGTCAGCGGACGCGGGACCGGACTGGACACGACCGAGCCACCTCCCCGGAGGCCGCAGCGCCGGCAGTCTCCCAGGATCAGTCAGCCAAGAGACCCGAGATTCTCAAATCACGGCAGCCGCCAGAGGTGCCCCTGAAATCACAGCTACGCCCTAGCTCAGCCCCGCCTGGAACTGTGCTCCTTTTATCTCTGCCCAAGGTGAGGGAACTCAGGGGACCTTCCTGCTCCTGCCCCGCCCCTGCCCCCACAACCTTTGGCATCAACCACTGTCCCCACCCCCATCTCGGGGACTTGCTAGTCCTGGGGCTGCTGGGAGGGGTACAGCCACAAGAGGGATGCCAAGCCAGGGCAATATGACGCCCCCACAGCCCACCCCACT…
132014	IL17RE	64	73.34375	71	NM_001193380	ACAGCAAGGCCCTGCCACCCACCTTCAGGCCATGCAGCCATGTTCCGGGAGCCCTAATTGCACAGAAGCCC
56652	C10orf2	3711;1034	652.241444354621;192.907156673114	651;184	NM_021830;NM_001163814	GAGTAGCATGTGCGGGAGACTCACGTTGCCGGCGAAGTGGGAGAGAGAAAAGTGGTAACCTGGGGCTGGGGGCCGGCGCGGCGGAGCTCGGAGTAGTAGAGCGGAGTGAAGACACGGGGGAGGATAGAGACTGGCATTCCTTTGGGCCGGGGGATTGGCGGGAGTCGTGCTGGGTGCTCTCGCCGTGTTGAGGTCCCAGTGAGGGGAAGGAGAAGCGGAAGAGGGTCTCTAGTCGGGGCCTAGGGCAAAGGGACTACAAAAAGGATGCAGATGACTATAGAAATGAGGACGACGAGGAGATGCTGTGGAGGAGCAGTAGAGGTGAGAAGATGATGCAAAGAAACTGTGTCAGTGAGGAACTGTATAGAGGGTCATAGAGGTGAGGTGGCGGAGAGAAAC…
94239	H2AFV	603;603;264;603	25.154228855721;25.154228855721;34.344696969697;25.154228855721	18;18;34;18	NM_201517;NM_201516;NM_201436;NM_012412	GGAGTCGGCGCCGAGAAC;GGAGTCGGCGCCGAGAAC;GCGGCCGAGCGGAGGCGGAGTCGGCGCCGAGAAC;GGAGTCGGCGCCGAGAAC
9113	LATS1	182	370.681318681319	374	NM_004690	GACACTGAGTGGAAGGCAAAATGGCGGCGGCGGCGGCGGTGGCCTGGTGTTAAGGGGAGAGCCAGGTCCTCACGACCCCTGGGACGGGCCGCGCTGGCCCGCGGCAGCCCCCCCGTTCGTCTCCCCGCTCTGCCCCACCAGGGATACTTGGGGTTGCTGGGACGGACTCTGGCCGCCTCAGCGTCCGCCCTCAGGCCCGTGGCCGCTGTCCAGGAGCTCTGCTCTCCCCTCCAGAGTTAATTATTTATATTGTAAAGAATTTTAACAGTCCTGGGGACTTCCTTGAAGGATCATTTTCACTTTTGCTCAGAAGAAAGCTCTGGATCTATCAAATAAAGAAGTCCTTCGTGTGGGCTACATATATAGATGTTTTC
55738	ARFGAP1	213	94.145539906103	92	NM_175609	GGGCGACCGGGCGCATCCTCATTGCAGTGCGGCGGCCCTACCTCGGCCCTGGCCTGACCCCGGCGGCCCTGCCCGCCCCTCCCTCCAGCATC
124583	CANT1	383	374.958224543081	372	NM_001159772	CTCCGTCCCGGCCGTTAGCCCAGCCAAGCCCAGCCAAGCCCAGCCAAGCCCCGCCGATCGCGGGCACCGGAGCCAGCCCCGCAGCGGGAGCCTAACCCAGAGGAAGTGGAGACTCCTTTACTGCACATCTGTCTGCTCCAGGCCAGGCACTGTTCTAGGAGCCAGGATACAGAGGTGGAGACAGAAACAAACAAACCGATAACTGTATACAATACTCTAACGTCAGAGGGACCACAGAGCACCAGCCTGCATGGAACTTCCTTCCTCACTCAGCTTCCCACGTTGCCAGCTGGGACAGGGGAGATGGAGTAATTTTGCTGTGGAAAGACTTCACGTCTTGCCGAATGAAAGTCCCGCCTGTCTGTCACGCTG
84450	ZNF512	352;117;352;352;352	59.377840909091;285.17094017094;59.377840909091;231.377840909091;391.377840909091	55;285;55;227;387	NM_032434;NM_001271289;NM_001271286;NM_001271287;NM_001271318	GGCGTTGGTCTGGCCGGAGCCCTTGGGTGAAATTGTTAGGCGTGGAGAGGGAGTG;GGAGAGCGGAAGTGGCGTTGGTCTGGCCGGAGCCCTTGGGTGAAATTGTTAGGCGTGGAGAGGGAGTGATGTCTTCCAGACTCGACTTCGGGACCCACAACCTTTAAGCAGCAGAGGAGCACGAGGATCGTGGGAGCTAAGAATAGCAGGACCCAGTGCTCCATAAAGGATAATAGTTTCCAGTACACTATCCCTCATGATGACTCCTTAAGTGGTTCATCGTCTGCATCTTCGTGTGAACCAGTGAGTGATTTTCCAGCATCTTTCCGAAAATCTACCTACTGG;GGCGTTGGTCTGGCCGGAGCCCTTGGGTGAAATTGTTAGGCGTGGAGAGGGAGTG;G…
5315	PKM	35544;35131;35162	109.765811388701;180.010389684324;224.993487287413	110;180;225	NM_002654;NM_001206798;NM_001206796	GAGGCTGAGGCAGTGGCTCCTTGCACAGCAGCTGCACGCGCCGTGGCTCCGGATCTCTTCGTCTTTGCAGCGTAGCCCGAGTCGGTCAGCGCCGGAGGACCTCAGCAGCC;GAGGCTGAGGCAGTGGCTCCTTGCACAGCAGCTGCACGCGCCGTGGCTCCGGATCTCTTCGTCTTTGCAGCGTAGCCCGAGTCGGTCAGCGCCGGAGCTCTCCAGGGCACACCGTATTCAGCTCTGAGCGGTCTTTGCTAGTGAGGCCAAGGAGCCACCCTGAGCCAAAAGGGGAGCATT;GAGGCTGAGGCAGTGGCTCCTTGCACAGCAGCTGCACGCGCCGTGGCTCCGGATCTCTTCGTCTTTGCAGCGTAGCCCGAGTCGGTCAGCGCCGGAGGTGAGCGGTG…
6944	VPS72	11035	54.845854100589	46	NM_001271088	GAGCTGGTGAGGGGCTGCAGGTGGCGGCGCAGTCTCGGTAGGCGGT
57185	NIPAL3	1143	361.907261592301	360	NM_020448	GAATTGGGAAGGGATGAAGGAGGCTGTGCCTCCGGGTTGCACGAAGAGTCCGAGTCATTTCTCAGAAGGTTTTGATAGGTGGGCCTTAGAGGAGACGCCGCCGAGCACCGCAAGAACTGGAAAACACACCCCTCTCTGTCTGCCTGGGAGAGCCACGGAAATTGGCACTTCTCTGAGTGAAGCTGAGGAGAAGGCTGTAAATCTGCCAAAACAGCCTTGAAGTATTCTTTTGTCATGAGGAAGTGACGGCTGCTGGAGGGAGGTGAACACCACAAGGAGAGATGGCATCTGGCCTGGGCCCCGCCTAGCAGCAGCTCCACCTCCTAGGCCAGGCCCTGTGGGATGCGCCACTAGACCACC
5425	POLD2	4054	265.135915145535	267	NM_001127218	AGGCGCGCGGGGATTGGCGGGATGCGGCGCGCCGCGCGGGTGAGACATCGGTATCCAGGCACGATAAATTTCCAAGTGGACACAATGTCTGGTGTCAACTACAGCTGTTCTCCTTCTTTTCCCAGTATCCTTTGGGTGCAGTGAGACACCAGGAGAGCTGCTGCTTTGGGGGATGGACAGGGGCAGCAGGAATGCCTTTGTGTTTTCGCAGTGAACCTCCTTGGCCTGGGCGAAGCTGTGTGGACCAAGCAAGTCAGGAGTGTGGCC
996	CDC27	520	144.298076923077	148	NM_001293091	CCCCATCCCCCGGTAACGGTCGCTGGTGAGTTTAAATGAGCAGGGGCTGGCCGGGCCGGAGCCGCTACAGGGGGGGCCTGAGGCACTGCAGAAAGTGGGCCTGAGCCTCGAGGATGACGGTGCTGCAGGAACCCGTCCAGGCTGCTAT
4673	NAP1L1	1178	124.469439728353	108	NM_139207	CTCCTGCTCCTCCCGCTGCTGCTGCCGCTGCCGCCCTGAGTCACTGCCTGCGCAGCTCCGGCCGCCTGGCTCCCCATACTAGTCGCCGATATTTGGAGTTCTTACAAC
6934	TCF7L2	1487	546.071956960323	552	NM_001198525	GCCCTCCGGCATCTCATTAAGGCAGTGTGTTCCTCTCGCCCTGTCAATAATCTCCGCTCCCAGACTACTCCGTTCCTCCGGATTTCGATCCCCCTTTTTCTATCTGTCAATCAGCGCCGCCTTTGAACTGAAAAGCTCTCAGTCTAACTTCAACTCACTCAAATCCGAGCGGCACGAGCACCTCCTGTATCTTCGGCTTCCCCCCCCCTTTGCTCTTTATATCTGACTTCTTGTTGTTGTTGGTGTTTTTTTTTTTTTTACCCCCCTTTTTTATTTATTATTTTTTTGCACATTGATCGGATCCTTGGGAACGAGAGAAAAAAGAAACCCAAACTCACGCGTGCAGAAGATCTCCCCCCCCTTCCCCTCCCCTCCTCCCTCTTTTCCCCTCCCCAGGAG…
127018	LYPLAL1	1223	19.624693376942	10	NM_001300770	GGCATCAGCG
200958	MUC20	681;681;681	39.57268722467;39.57268722467;39.57268722467	24;24;24	NM_001282506;NM_020790;NM_152673	GTGGAGCAGCGGTGGCCGGCTAGG;GTGGAGCAGCGGTGGCCGGCTAGG;GTGGAGCAGCGGTGGCCGGCTAGG
5154	PDGFA	70	336.542857142857	361	NM_033023	CTCCTGAAGCCAGCGCGGGGAGCGAGCGCGGCGGCGGCCAGCACCGGGAACGCACCGAGGAAGAAGCCCAGCCCCCGCCCTCCGCCCCTTCCGTCCCCACCCCCTACCCGGCGGCCCAGGAGGCTCCCCGCGCTGCGGGCGCGCACTCCCTGTTTCTCCTCCTCCTGGCTGGCGCTGCCTGCCTCTCCGCACTCACTGCTCGCGCCGGGCGCGCTCCGCCAGCTCCGTGCTCCCCGCGCCACCCTCCTCCGGGCCGCGCTCCCTAAGGGATGGTACTGAATTTCGCCGCCACAGGAGACCGGCTGGAGCGCCCGCCCCGCGGCCTCGCCTCTCCTCCGAGCAGCCAGCGCCTCGGGACGCG
59349	KLHL12	656	151	133	NM_021633	TCCCGAGCCGCCTGCTAGCCCCGCGCCGCACTCCATCCCCACAGGCTGGGGACGGGCCCGGTGCGGCTGTGTGGGTTCGGGAGCGGAGTTGCAGAATCCAAGGACCCATTTTGTTCTTTCTCCGCACTGCTTT
153129	SLC38A9	1160	409.759482758621	402	NM_001282429	GGTCGCAAATTGCGAGAATTTGGGAAGGGAATCTTTATCTTCTCGTCTAGTTCTCCGAGGTTGAAGGCTCGGCCTGCTCAGAGAAGGAAACTGAGGTCCACCGAGTTGGAGAAACCTACTCAACACCAGGACTAACTTCTTCAGTGCTTAGAGTGTGAGAAAAATGGCAAATATGAATAGTGATTCTAGGCATCTTGGCACCTCTGAGGTAGATCATGAAAGAGATCCTGGACCTATGAATATCCAGTTTGAGCCATCGGATCTAAGATCCAAAAGATTGCCCCAGACCATGTAGTTCCAGCTCCAGAAGAGTGCTATGTGTATAGTCCATTGGGCTCTGCTTATAAACTTCAAAGTTACACTGAAGGATACGGTAAAAACACCAGTTTAGTAACCATT…
55627	SMPD4	1258	27.907790143084	6	NM_017751	AGCTTG
11332	ACOT7	65	166.092307692308	167	NM_181864	GGGGGCTGGTGGGGGAGGGGCGGTCCTAGGAGGAGCAGGAGCCTGGTGCTTTCTATCAGGGAGGGATCACACCGGCTCACTGCTGAGCCGGCCAGGCAGACACAGGCTTGGGCTCTGCTGGGCATCATACTTGTCACTGGGTAAACAGTTTGCCCACTTACCGCAGG
60401	EDA2R	74	93.9864864864865	94	NM_021783	GGGTGAGATGTGTGCTCTGCGCTGAGGTGGATTTGTACCGGAGTCCCATTTGGGAGCAAGAGCCATCTACTCGTCCGTTACCGGCCTTCCCACC
57127	RHBG	77	367.363636363636	371	NM_001256395	GCCAAAGCCTGCGAGCGCCAGCCGAGATCGCAGCCCAACCCATGGCCGGGTCTCCTAGCCGCGCCGCGGGCCGGCGACTGCAGCTTCCCCTGCTGTGCCTCTTCCTCCAGGGCGCCACTGCCGTCCTCTTTGCTGTCTTTGTCCGCTACAACCACAAAACCGACGCTGCCCTCTGGCACCGGAGCAACCACAGTAACGCGGACAATGAATTTTACTTTCGCTACCCAAATGGAGTTTCGCTCTTGTTGCCCAGGCTGGAGTGCAATGGCACAATCTCGGCTCACCACAACCTCTGCCTCCCGGGTTCAAGCGATTCTCCTGCCTCAGTCTCCTGAGTAGCTGGGATTACAGGCTTCCAGGACGTGCATGCC
4528	MTIF2	496	656.308467741935	750	NM_001005369	GAATCCAGGGGCCCGGGGCTGTAGGTAGGAGTTAAGTGGGTAGGATCCCTTAACCAGGGTTGTCCGGTGCAGGTGGTGTGTGTTGTTTCGCCTAACGTGTCAGTGGCACAAATCACGCGAACTTCATAAACATTGTGCGTTCGGAAGCCTTTCCAAGATGCATTTAATCCCTGCGTGAGCCCACGTTAGGCATTCACGAAGGCATGTGCACTGTTCTCTCGGAAGCGGCTGGCCGGCTTCCCCTCCTCGCGCGCGGCTGTGGGTGCAGGTCCTCACTTCCCAGCCTCCCATGGGCCCAAGGCCTTCTGGGCTCCAATTTGAGGCGAGCCACCCCAGATCCGTAATTTTTCTGCAGTGATTTATTTTTACCTTTCTGATTCCTTGACAAGGATATCCTAG…
100527963	PMF1-BGLAP	1480	19.4560810810811	9	NM_001199662	AACTTCAAC
83478	ARHGAP24	195	319.753846153846	293	NM_001025616	GGACCAGAGAGGAGCCTGGCGGGGGTGGCTGGGTGGCTGGGGGAATCCCCCCAACTTCCCATCGCAGGCGCAGCTCTCTCGGCCGCCTATTTCCTCCGAAACCCGCGCTGCGGAGCAGCCCAGTGCATAGAGTTCAACACTTCCCCTTGTTGTGGAAAGTAAAGGAGCCTCACTACCACCTTTTTTTCTTTGCGTTTTCTTACTGCTGGTCCTGGGAGCCTTTTCCTTCGGAGCAGCAGCCCTGTCCGGCATCTGTCTTGAGCTCCCAGCAAGGAAAGTCCATCAGCTTGATA
83461	CDCA3	170	626	717	NM_001297604	GCAGCTGCTCCGGCTCCGGGACCCTTAGAGTCCATTCGCGTGCCTTCTATTGAAGAGCAGGAACTGACGGTTGTTTTAGGCCTCTCAATTCCAGAAAGTTTCCTGGGGACCTGTCCGGTCGGAAAGTCGAGGGACAGTTGTCTTGGTATTTGTAAAGGGGGTATCCAGTGAGGCGGAGCTTGAGGGGGTTGTGTCGAGTGACTGATACAGCTGTCAACCAATAAAGCTACTATCGCTCGCCTCAGGAAAACCATCACAACTCCAGCTGGATGTGCGCATAATAGTGTAATCACTCATGATTCTATTTTGTTTAATAATTCGTTCTTGAGACTAGACGTCTCGAAAGCGAAGACTGGCACTCCTCAGCCTGCCACGGACGGCTCGCAGGCCGATACTGAA…
84886	C1orf198	83	15.204819277108	16	NM_032800	GGCGGGCAGGCCGGGC
9180	OSMR	84	303.416666666667	323	NM_001168355	CCGCAAAGTCCGGGTTGTGAGGCTGCGCCTCCCCCAGGATCGCGGCCGCCTCCCCCCGGGACTGAAGGGAGGGAATTCCTGTGGGTCCCAGGAGTGCCAAGAGTGCGCAGCAAGACGGGAAATTGCAAAAGACCTCACCCCTCTGCCCTCCCCCGCGGTTTTCCAGTAACTCCCGCCCCTCCGCGCTTGCCCCGCAGCTGATTCATAGCCCCGGCCCGGGCCGCCTCTGCACGTCCGCCCCGGAGCCCGCACCCGCGCCCCACGCGCCGCCGAGGACTCGGCCCGGCTCGTGGAGCCCTTCGCCCGCGGCAAAACCAGAACTG
102157402	AK6	2217	27.953089760938	18	NM_016283	GCCGTCGCGGCGGGGACC
79842	ZBTB3	58	93.258620689655	98	NM_024784	GGAGCTCGCCCTGTGGCTGCTCGGTGGTGGGTGAGGTATCAGCTTTCTCCGCTAGTTCCCACCCTGGTAGTCCTTAGCCCCTGGAATGCGTGAGGGAG
8539	API5	1385	123.447653429603	114	NM_006595	GGCGGCAGCTGGAGGTGTAATAGTGCGGGTAGTGGGTTTGGAGAAGTTCCGAGGCGGCGGTGGCGCCGGTCAGGACAAGGATAGCGGAACCGGGCCCTGGGCTTGTCGCTCACC
22949	PTGR1	149	107.261744966443	88	NM_012212	GCCCCCGCAGTTCCTTGGAGAGCTTGGAGCCGCGCGCCGGAGGGAATAGGAAAGCTTGGTTACAACCCGGGACACCCGGAGCTTCAGG
55850	USE1	1451	16.458993797381	16	NM_018467	GTAGGGCCGGGCGATA
5279	PIGC	2269	314.298369325694	313	NM_153747	GGCGGACCCGGAAGTGCTTGGCCACAGTCGCAGCCCCGGCGCCCCGAAGCGGGAAAAAGGCTGGGTGCCGCCGTCCCCCAGCTGCGCAACCCTAGGAACTCTCGGGAACTTGGCTGTGTTGTCCTGCCTCAGAGACAAATTCATCTATTGTAGGCCTAGCCCCTGCCTTTGAAAACAAGGAAAGGTTGGTAGAACATCAACACAGCATGGAATTTCCAGGGAGGTCTCATTTCAAAACTTCATAAAGAACAAGAACCACCTGGACTTCTGTGAGGGCGATGATTAAACTGGCCTGAGTTTGAATGAAAGGATA
10611	PDLIM5	345	137.553623188406	150	NM_001011513	GCCAGGAGGCGGAAGTTCCCGCGGGCGGTGGGGACGGCGCCCTCACCGCGAGTCACTTGTCAGCCCTTGTCTGAGGCGGAGGCAGCCCCGCGCCGCGCCGGACCCGAGCATATTTCATTTTCTGTCATTGGACTTTGAGCCATTAGAACC
51009	DERL2	5991	13.4526790185278	14	NM_016041	GGACGGTGGGGAAG
90993	CREB3L1	263	12.996197718631	13	NM_052854	GGAGCCGGCTGCG
84311	MRPL45	731	26.735978112175	24	NM_032351	CCCGGCGGCCTTTGCGGGAACAAG
27332	ZNF638	167	301.131736526946	306	NM_001014972	GCGCATGCGTGCAGCTCTTTGGAGGCGGTAGCGTTTTCGGCGTCGAGACTGGAGGCTGAGTGCTAAACTGTGTGGGGCGCGGATGGGATCCAGCTGTTAGTCGGCTTTGTGTTATTCTTGGAAAATTTCGCACCACTTGTGAATTCCTTGAACCTGGGCATTGCAAACCCACTTCTGTTGGGCCCATCTCCTTTGCACTTTGCTCAGATTAAGACTCAGTTGGCGCTTCAGCAGCTGAATGCCGTTGCCTCACATGGTTCAACACCACCTTATACTTTATTAAATCAGGCTTTCTTGAAAATAGCC
23240	KIAA0922	57	29.017543859649	32	NM_015196	GGCGAGCAACGGAGAGGAGCGCGAGCAGCAGC
124637	CYB5D1	256	163.39453125	157	NM_144607	CAGTGGACGGTGGCCGGAAAAGGACAATGGTTTCCATGTCAGCGGATAAACGCTCTCCCCTCGGCTCCCGGACGCGACGGAGGTCGTAGTAGTAGTGAGTACGTGCTGAGGAGCAAAGGAGTAACCAAGAGATCCAGTGACCGACAGAGCAAGAGCC
56259	CTNNBL1	12870	245.205905205905	268	NM_001281495	ACGGCAGTGTGGCTGGAGCCGCGGCTGACGGGCCCGCGGTCTGGGCGTGAGTGCAGGGAAGTGGAGTATTTGCTGGGCCGGGTACCATGGACGTGGGCGAACTTCTGAGCTACCAGGGGCATGGATGGAGACACGCACACACACAGGCAATAGGCCTCAAGATTATTGGCGAGTAAAGGCATCTATCTATTATCGTGAAGCCTACTCTGAGCTTTGACCCAATAGGGGCACAAAACGTCCCCGGGATGATGAAGAGGAGGAGCAGAAG
79691	QTRTD1	143	196.34965034965	234	NM_001256837	GGCAGTGATTTTGGGGCAGAGAATTTTGCAACACGTGGTAGTGAACTGTGAGGAGTTTGAGGGGTCTGAAGACTGAAAGAGTCGAATGGTTTGTTGGCAGGACCTAGAAGAATCCCTTAGGATGAAGCTGAGTCTTACCAAGAGCAGAACATCATGAAGTCTTGACAGAATATAAAGAAGGAGTTGGAAAGTTTATAGTCTGTGTCTGTGTGGAGTGTTGCAGGACGAGTGGAA
84902	CEP89	2795	85.1076923076923	103	NM_032816	GCGTGAGGGCTGGGCCTGCGGCGGGCTTTAGGGAGTGGTCCCTGGCTGTGGATAGATCTGCTGATGAGTCCAGGCCCCGGTCCATTCTCCTCGCGCTGCAAGG
5678	PSG9	248	78.20564516129	30	NM_002784	ACAGAGGAGAACACACAGGCAGCAGAGACC
2187	FANCB	335	281.602985074627	283	NM_001018113	GGCCTCCCAGGATGCAGCGCGCTGGCGGGAGGTTTGGAGCAGATGGATACCGTATCGACGTGGGGCCTCCGGTATGTTGCCGCTGCGTTGAGTTTCATAAGTACAAGCCAGACCTTTGATTTACCTACCCTATCTTCTTTACTGATGAAGCTGAAACTACTTTGTGATGCCTATTGTCCCAGATCTTTCTGTTAATTGCCTAACAACAAACCAGTTTAGAAACATCAACTGGAATCAATTTGCATTTGAAAATTAGATCAGCACAAAGACTTGATATTGTGGA
284338	PRR19	1162	199.260757314974	224	NM_199285	GGCTGGGTTCTCCTCTCCACTCATCTTGGCGCCGCAGCTCCTGCAGGATGAGCGAGTCGGGTCGGCCCGGGAGTGTTCCGAACGGAGCTGGCTCCGCCACGCCCACTCCTACCCCTCGCGGCAACAAAGGACCGTCCCAACGCTAGCACACCCGCGGAGGACGAAGGCCGATACAGGGCGCCGCCTCCTCTCCAGGGACGGAAGCCTTCACTTAGGAGGACACC
5916	RARG	353	322.382436260623	357	NM_001243730	GAAAAAGAAAGAAAATATTTTCCGTGTCCCCGCCTGCAGAGTCAGTGTGCGGTTTGGGAGAAAATGTGTCGGATATTTTGGGGCGGTCACGTGGGCGGGCGGGCTCCGAGAGGCCCCGGGACAGTCCCAGCCTAGAGCCGTGCCCCCCCAGGAGCCCCCCAGTACGGCGAGCCCCGGACATTGCGACGCTCCATCCAAGAGACTGCCCGACGCCGGGACCTCGGGGCTCCGCCGCCTCCCTTCCCCCTCCCACTCCAGCAGCTACGGCCCAGTTCCCTCAACCTGACCCAGTATGTAGAAGCCAGTCTCTGCAGGCGGCCAGCGGCGGTGGAGACACAGAGCACCAGCTCAGAGGAG
10726	NUDC	46797	97.311601171015	93	NM_006600	GACTAGAGTCGTTGGGCCCGGCGCGACCCGCAGGAGCGTAGAGAGCGCGGGACTAGAGTGCAGAGCTCCGGGACGTGGATCGGAGCCGGCGCG
22872	SEC31A	3311	94.698580489278	86	NM_014933	GGGGAGGAGGGGCGGCGGCGAATGCTGGGAGAGTCCGACGAGCGCTGCACTAACGCAGGATCCGGCTGCCGAAGGTCCTCGCCAGG
2099	ESR1	483	223.87784679089	222	NM_001122740	AAGGCAGCACATTAGAGAAAGCCGGCCCCTGGATCCGTCTTTCGCGTTTATTTTAAGCCCAGTCTTCCCTGGGCCACCTTTAGCAGATCCTCGTGCGCCCCCGCCCCCTGGCCGTGAAACTCAGCCTCTATCCAGCAGCGACGACAAGTAAAGTGGCCCGCCGGTTTCTGAGCCTTCTGCCCTGCGGGGACACGGTCTGCACCCTGCCCGCGGCCACGGACC
6205	RPS11	2871	21.772204806688	29	NM_001015	CCCTTTCTTTTTTTCAGGCGGCCGGGAAG
220134	SKA1	535	190.900934579439	182	NM_001039535	GCGGCGGGCGGTTTGAATTTTGCTTACAGAGTCCCGTCTCACCATCCTGGGCTTCCAACGGAGACTGCGGTATCCGCAGCTGGAGACCCAGCGGCGAGTAGCCTTTTGCTCCCGGACGGACTTGAGGTTGGAGTCTGTGTGTTGGGGACCCTGCCTTTGGAAGCGCCCGAGAGGCTTAAAGG
51596	CUTA	15028	369.878360393931	506	NM_015921	GGGATTGGCTGGCTCTGGAGGCGCAGGTGGTCCTTCTTCTACTGTCACATGGTGCGCGCTGTTTTCTAATCACGTGGCTGCCACCCAGGTAAGAAGAGGCCGCTCTTCCTGGGGTTGTTTCTCCGTGTGACGTGTGGCCTTTGAGATCAACTCTCCTGTACCAGCGTAGGCCGCATGAGTGGGGGGCGGGCTCCCGCGGTCCTGCTCGGCGGAGTGGTGAGTGACCGGCCCCGCCCCGCCCCTTCCGGTCCTCGAAGCCTCGACCGCTACCCGCACCCTAAATCCCAGAGGTTGGCCCCCTGAGGTGTGAGTGAAATGAGCTTTTGCTTTATTTTCCAAGTTTCTCTCTCACCTTCAGGGGCATTCTTCGGGGGTGCATCAGAGGGAGGGCAGAGCCTG…
57511	COG6	185	26.4	22	NM_001145079	AGGGGGCGGGACGCGCAGCGCT
55197	RPRD1A	449	14.0311804008909	12	NM_018170	GGTGTCGGAGGG
3958	LGALS3	480	58.089583333333	53	NM_001177388	GCCCGCAGCACCTCCTCGCCAGCAGCCGTCCGGAGCCAGCCAACGAGCGGAAA
8801	SUCLG2	551	23.3284936479129	24	NM_003848	CCCGTGCCGAGTTTCCTGTTTAAG
5194	PEX13	1547	34.79185520362	24	NM_002618	GGGAGCCGAGAGGAGGCGGAGGAG
54880	BCOR	167;167	23;23	23;23	NM_001123383;NM_001123384	AAGCTGCCATCCCAGAAGACGAC;AAGCTGCCATCCCAGAAGACGAC
51000	SLC35B3	291	486.93470790378	472	NM_015948	GCTTTCCGGGGAGGCGACCGCCGCGGTGGAAAGTGCAGGAGTGGGCGAGGAGGAGGAGGAAGAGGAGGTGATGGCGACGGACCAGGGGAGGGGGAGATGCTCCGTCTAGCTCAGACGCCACGCAGGCTGCCGTCACCCTTCCGGGTGACATACCGGCCTTGGGGTACGCGTGCCTTCGGGGCCTTTCCTGTGTTTGGGACCCAGATCTCCTCTCCTCCAGAAAACCTTGACACTGCCCATCTTCCTCATCCAGAAGGAGCGTTCGAGGAATGGATGAGGTCGGGATGGAAGAAACGGGTGATTCCCTTTTTTGAAAGAGCGGAAACCGGCCGGGCGGTTTCCAGGGAGGAGCATCTGTTCCTCCTCGCCCGTTTTTCGCCCTCGGGCTGGCGAGAACTC…
10607	TBL3	1554	105.71879021879	107	NM_006453	GCGCCGGGAGTGTGGCGTTCTGTGAAGAGTTCGGTGCTAACCTCCCTCACGCGGCGGTGGCTGCCGGGACCCTAGCAGGTTTCAGCTGGAGCGGCGGCGGCGGCAAC
91452	ACBD5	55;124	152.381818181818;109.5	166;109	NM_001301253;NM_001271512	GGTGCTGCTGCTGCCTGATTCCCGCCGACAGACCTTGGGACCGGGGCCAACACTGGCAGCTGGAGATGGCGGACACGAGATCCGTGCACGAGACTAGGTTTGAGGCGGCCGTGAAGGTGATCCAGAGTTTGCCGAAGAATGGGATGCTTGGAGTTCACTGGGTGAT;CGGGCCGCTTCGATCTGTGTGGCCTGGATAGGGCAGGGCAAAGGGGAACTGACCCGCTTCGCTCCCGGGCCTCCTCCTTTTGGGGCATGTTGATCCGCGGCTGCGCTCC
7071	KLF10	678	83.511799410029	73	NM_005655	GCGCCCGTCTGTGGCCAAGCAGCCAGCAGCCTAGCAGCCAGTCAGCTTGCCGCCGGCGGCCAAGCAGCCAACC
128486	FITM2	1137	49.34036939314	38	NM_001080472	GGGCACGGAGAGGAGGACGGTGGCTGACGAGATCCGGC
146434	ZNF597	73	181.013698630137	167	NM_152457	ATGAGAGCGTGGGAGTTTTGCAGTGGCCGTGGCGTTCTTCGTCGCGTCTCGGTCGGGCGTCGCTTTCTGCAGCTCCTGTCAGGGAGCGCGAGGCCTGTTATTAACCGCGGAGCGCTTTGTCACGAAGTCCCTGTGGCGTCTTGAAGAAGGCATTCCCCACCCGCCAA
729852	UMAD1	247	176.890688259109	180	NM_001302348	GGCGGAACCTGAGACTACCTTTCTGCGATCACAGGATTCCCGGCGGTGACTTGACCCCGGAAGTGGGGTGTGAAGCTCCGGTGCTGGTGCGGCGGGGGACTGCGGGGCCAGCCTCAGGTAGCAGCAGCAGCAGCAGCAGCAGCAGCAGCAGCAGCAGCAGCAGCAGCAGCAGCAGCAGCA
8678	BECN1	4651	143.931197591916	144	NM_003766	ACCGGGAAGTCGCTGAAGACAGAGCGATGGTAGTTCTGGAGGCCTCGCTCCGGGGCCGACCCGAGGCCACAGTGCCTCCGCGGTAGACCGGACTTGGGTGACGGGCTCCGGGCTCCCGAGGTGAAGAGCATCGGGGGCTGAGGG
80324	PUS1	715	460.647552447552	455	NM_025215	TCCGGCTCAGTCAGCCGCGTCGCGAATGGGGCAGGAGCGAGCCTCTCTGGTCCCGACGCGGGTGGCCCGGGTCTCCTCGACTCCTGAGGAAAGCCCACCGGGCGGGGCGGGAGGTGAAGAGGCTGGGGAAGTCAGAGGTTAACCTGGGCGTCAGGGGACGTTGGAGTTGATCCGTCAGGGTCCCGGGGCGGTCTGGGGGCAGTAGAGACGGGGCTTGGGCGCGGGGCCTGAGAGGTCAGGGGTCAGCAGGAGTGAGGCTGGGGCGTCCAGGTCCGAGAGGTCAGGGGTCAGCTGGAGAGGGGCTGGGGCGCCGGTTTCCCGGAGGTCAGGGGTCAGAAGGAACAGGGCTGCAGCGTCAGGGTCCGAGAGGTTAGGGGTCGGCAGAGGCGGAGCTGGGGC…
200894	ARL13B	808	253.851485148515	240	NM_182896	GGCTACGGTGTATCTGCGTCTTTGGTCAGGTTGTTCCTTGGCTAAGAGGGCAGTCGTCGCGGACCCACGCGGTTAGCAAGGCTTAGTGCTCGGGCCGGCCGCCTTCACTTCCCTCCCGGCTTTTCCTCCCGACTTATCCACTTTAGGGGCGTCTCGGAGTGCCGGAGGCCCCCGGGGAAGAGCGGGGTGCCGGTGTCCGCTCCGGGCTCGGATGGGAAGTGGTGGGAGGAGCGACCCGGG
11051	NUDT21	3498	132.664665523156	132	NM_007006	GCCTCCTCTTGCGCTGTCCTGTTAATGGCGGGCAGTAGCCGCTGAGGGGATTGCAGATAACCGCTTCCCGCACGGGGAAAGTCTACCCTGCCTGCCACTTTCTGCTCGCCGTCAGCGCCGGAGCTCGCCAGC
8625	RFXANK	717	159.676429567643	151	NM_001278728	AGAGGAAGCCAGATCGCTGAGGGTCCGGTCTCCAGTTTGCCTCCTGCTATATCCATTGGAAGAGAAAAGTTTGTGACTTGGGCCCCCAAGTTTTGAGAGAACTGGGCTTTCGGCGCGGGGGGACAGAGGAGGCTCGTGGGGAGCTTTCCCC
1434	CSE1L	3915	109.61711366539	110	NM_001316	GCCGGGGTTTGAATGTGAGGCGGAGCGGCGGCAGGAGCGGGTAGTGCCAGCTACGGTCCGCGGCTGGGGTTCCCTCCTCCGTTTCTGTATCCCCACGAGATCCTATAGCA
79568	C2orf47	553	28.094032549729	10	NM_024520	GGTCATAAAA
10975	UQCR11	1976	41.22975708502	31	NM_006830	AGGGTCATCCTGAGGGTGCGACTCCGCCGCG
11158	RABL2B	141;141	150.957446808511;146.957446808511	151;147	NM_001130922;NM_007081	GGTTCGAGAGCGCGCAGAGTCCAGACTGGCGGCAGGGCCCGAGGGGCCGACCCGCAGCGTCCCTGGTCTCTCCAGCCCTCACTCGGAACCGCACACAGTGACAATACCCTCCCCTCCCTTGGGCTGGACCCCTCTCTACAGCTAGGAGCCA;GGTTCGAGAGCGCGCAGAGTCCAGACTGGCGGCAGGGCCCGAGGGGCCGACCCGCAGCGTCCCTGGTCTCTCCAGCCCTCACTCGGAACCGCACTGACAATACCCTCCCCTCCCTTGGGCTGGACCCCTCTCTACAGCTAGGAGCCA
118487	CHCHD1	2237	17.8842199374162	19	NM_203298	GCCGGGAGCTTGGTGCGCT
23253	ANKRD12	566	221.565371024735	223	NM_001083625	GTCCTGGGAGCGAGGAGGCTGTGGTGAGAGACGGACCGAGACCGGAGATGTTTTCAAGCCCGGCTCCGGCGGCTTTACAGGCGGCTGCAGCGGCGACGAAGACAACGACAGCGACGGCTACGCCGAAGCACTCGTTCCGGGGGTGAAGCCTCCTGCGCCGGCCTTGCCTCGGATCCAGGATGAGAAGACTGATAAAAGAAGAAGCTAGCTGAACAGCTGTAAA
1802	DPH2	553	177.151898734177	176	NM_001384	GCGGAGAAACAGTAGTTAGGATGGCTGAAGGGGATACTCACCGGCTGAAGGCCGACTGTGATTCCCCCTACCCCCACAAGGCGATTTTGACCCCCTGAGGGCTGCTCTAGAGGACTCAGGCCCCGAAGCTGTCCCAGGGAGGTCCCCGCTGCATCCCACCACCCAAGCTGTGCCTC
65003	MRPL11	3045;3045	77.2449917898194;77.2449917898194	75;75	NM_016050;NM_170739	GGCCCAAGATGGTGGCGCCCAGAGCTTCGCTCTTGCTGCTCCCCTGAGGTGAACTGAAGCCAGCAGCCCCGCATC;GGCCCAAGATGGTGGCGCCCAGAGCTTCGCTCTTGCTGCTCCCCTGAGGTGAACTGAAGCCAGCAGCCCCGCATC
51362	CDC40	76	23.9473684210526	20	NM_015891	GCAGAAGATTTGTTGCCGTC
10171	RCL1	459	372.745098039216	400	NM_001286699	GTCTAGTCTCTCCGTCTTCCTGTTCCAAACCACGTGGACGCGTCTGGGCTGCTGGAGGCAGCCCGAGCCGCCGCCGTCGGTGTCGCCGCCACCACCACCATCGGAGTCACGAGTCCCGCGTCTGTCCGAAGTCGCCGCTCTCGGGCTGCTCACGTCTCTTCGGAGAGCGCGCACATGGCGACTCAGGCGCACTCCCTCAGCTACGCAGGGTGCAACTTCTTGCGCCAACGTCTGGTCCTGTCTACCCTGAGCGGGCGCCCCGTCAAAATCCGAAAGATTCGGGCCAGAGACGACAACCCGGGCCTCCGAGGTTGATGTTCTTAAGGCAACAGCACTCCCTTTGTTGAAACAATTTGGGATTGATGGTGAATCATTTGAACTGAAGATTGTGCGACGGGGA
116840	CNTROB	1368	852.036549707602	826	NM_053051	GGCGTGAGAGGGGGATCTCAGGGGAGGAGGTCAATCGCTTGCCCCCCACTTTGGCAAATTGGGGACTGAGGACTGGAAGGGTGGAGAGTAGGCGGAACCAGGTGGTCGTCGGGGCAGAGGATCTCGGGCTAGGCTTGAGGGCGGCGTGCTTCTTAGGGACGACTTAGGGCGTGACTGAGGGTTCACAAGGTTTCTTTTGGGGTGGTCGGGAGGGAGAGATTCTAGGGAACAAGGAAGCTCGCTATGGCTTTCTTGCCAGGAGGGGTCGAAGGGAAAGTACAAGGGAGCTGACCCTGGGTAGAACGGGTGAAGGGATGGGGGAGCGTGAGGTTCCGCCCTCTCTTGAGACTGGAACCAATTGAGGGACTAGTAGGGCAGGGGGACAGAAATTGGGCTCCT…
26277	TINF2	894	282.813199105145	286	NM_012461	ACCCTCGGGCTCGAGACAGCGGCGACGTTTAAAGCTGAGCGACCCAGTGCCACTGGAGACGGTCAGCTTCTCCACTCAGGCTCCTCCAGCCCGAGCCAGAAGACCCCCTCCCCCAGAATTCTGGGGGCCGATGGAAGGGAGCCGAGTCAGATCGCGAGGTACCCAGAGCCGACAGACCGGAGCGACAGGGAGTTGCCAGAAGCCCCGCCCCTAGGAGTGATCGGAAAGCCTCACCCATCCGGGTGAGGAACCCGGAGGGACCGCCTCCGGGCGGAGCCCGCCGACC
6657	SOX2	1136	427.727992957746	437	NM_003106	GGATGGTTGTCTATTAACTTGTTCAAAAAAGTATCAGGAGTTGTCAAGGCAGAGAAGAGAGTGTTTGCAAAAGGGGGAAAGTAGTTTGCTGCCTCTTTAAGACTAGGACTGAGAGAAAGAAGAGGAGAGAGAAAGAAAGGGAGAGAAGTTTGAGCCCCAGGCTTAAGCCTTTCCAAAAAATAATAATAACAATCATCGGCGGCGGCAGGATCGGCCAGAGGAGGAGGGAAGCGCTTTTTTTGATCCTGATTCCAGTTTGCCTCTCTCTTTTTTTCCCCCAAATTATTCTTCGCCTGATTTTCCTCGCGGAGCCCTGCGCTCCCGACACCCCCGCCCGCCTCCCCTCCTCCTCTCCCCCCGCCCGCGGGCCCCCCAAAGTCCCGGCCGGGCCGAGGGTCG…
132299	OCIAD2	2761;2819;2819	204.893516841724;270.031571479248;181.031571479248	205;271;182	NM_001286773;NM_001286774;NM_152398	GGGGAGACAGGTGGGGTACTCGGGAAGCTGGAGCGGGCCGGCGGTGCAGTCACGGGGGAGCGAGGCCTGCTGGGCTTGGCAACGAGGGACTCGGCCTCGGAGGCGACCCAGACCACACAGTGATTCTCTTCTACCTTCCTTAGACACTGGGTCAAGGAGTAAGCAGAGGATAAACAACTGGAAGGAGAGCAAGCACAAAGTCATC;GGGGAGACAGGTGGGGTACTCGGGAAGCTGGAGCGGGCCGGCGGTGCAGTCACGGGGGAGCGAGGCCTGCTGGGCTTGGCAACGAGGGACTCGGCCTCGGAGGCGACCCAGACCACACAGACACTGGGTCAAGGAGTAAGCAGAGGATAAACAACTGGAAGGAGAGCAAGCACAAAGTCATCATGGCTTCAGC…
81858	SHARPIN	504	432.468253968254	434	NM_030974	GGAGGTCCCGGGAGCGAAGTCCAGCTGCCGTTAGGCGCTGGGATAGTCGCACGCTGGATGCATCTACGTCCGCCGAGCCCCTGGGGCGAAGAGGCCGCGTCCGCCTTCAGTTGTGGCCGGTGCTTCGCCCCCTGACCCTTCGCCCCCAAAGACCAGCTCTAACGTGAGCGCCTCGGCCGCCCTGCCCCAGCCTCGTACACGCCGCCAGCCTCGCCCAGCCGGTGTCCGGAGACCCTCGGGCCGTGTCCATTTGTGGGCAAAGCCAGCGGGGCAGGCTTGGCCAGAGTGCACCACTCGGCGCCGTCCCAGGCCCGACGCTCTGGGCGCGCCCGGAACCCCAGGTTCGCGGCCCGTGTTTCCGACCGGCGGAGGGGGCTCAGCGGCCCGATCCCACGGAAG…
9689	BZW1	3154	111.40424857324	79	NM_001207067	AGAGGAGACACCGCCGCAGTTGCCGGTACATCGGGGATTTCTGGCTCTTTCCTCTTCGCCTTAAATTCGGGTGTCTTTT
10193	RNF41	77;2199	289;367.933606184629	289;374	NM_001242826;NM_005785	GAAATAACTGGGGTTCAGGAGGAGGGATGGTGGTAGAGATAAAAATGTGAGAAGGGAGCAGCACTGGCGAGGAGTCGGGAGAGTACTCCTGATTGTGACATCACATTCATCCCCTGGGCGATGGAGCTTGTCACTGGGAAGGAATACTCAGTCGGAGAATAGCCAACAAGATGGGTTACTGGGAGAATCTCTTCAGTGGCACTGAGTGGAGGCATCAGGGGGTTGGAGCCTTGTGAACAGGGAACCTGCCCCCCAACACTTGGAAGGACCTGGGTTTCAGTGATGAGAC;TCCGTCTGAGGCGGCGACGAGTGGTAGGAGTCTTCTTTCCCCTCCTTCCCCTTTCCCTTCCCTTCCCGGGAGAGGCTGGGACCCGGCACCAGGGCAGTACTGTGGCCGC…
57826	RAP2C	407	78.292383292383	16	NM_001271186	GGTGAAGGTGAGACTC
22920	KIFAP3	524	600.681297709924	550	NM_001204514	GTGGTAACCACAGCGCCGCTGCTGCCCCGCCTTGCAGGCCTCAGGACTGTCATCGCCTCTGGGTGTGAGGGTACTTTGGCCACCGTCCCCGGAAATAACCGCGCCTGCCTCTCAAGATACCCCATCCTCTCCACGCCGCTGCCGCTGCCGCCATGCAAGGGGAGGACGCCAGATACCTCAAAAGGAAAGTTAAAGGAGGGAATATAGATGTACATCCATCAGAAAAAGCACTCATTGTTCACTATGAAGTGGAAGCTACCATTCTTGGAGAAATGGGGGACCCCATGTTGGGAGAACGAAAAGAATGTCAAAAAATCATTCGACTTAAGAGTCTCAATGCCAACACAGATATAACTTCCCTGGCAAGGAAGGTGGTTGAAGAATGTAAACTCATTCATC…
51147	ING4	260	47	47	NM_016162	ACAGTCACTTCCGGGGCGGATCGGAAGTTGCTTTGTTTTGCTTCGAG
10912	GADD45G	288	109.989583333333	110	NM_006705	GCACTCGCTGGTGGTGGGCGCGCCGTGCTGAGCTCTGGCTGTCAGTGTGTTCGCCCGCGTCCCCTCCGCGCTCTCCGCTTGTGGATAACTAGCTGCTGGTTGATCGCACT
11345	GABARAPL2	1663	96.482260974143	92	NM_007285	GCCGCTGCCGCTGCCGCCGTCGTTGTTGTTGTGCTCGGTGCGCTGAGCTCCGCGGCTCCGCGAGCCGGTTCCGTCCCCTTCCCGCCGCCGCC
201163	FLCN	673	475.594353640416	465	NM_144997	GAGTGAGTGTGGTCGCTCCTGGTTCTGCCAGCTCCCCTGAGAGCCTGAACCCGGGCTTGAGAGCCTCGCCACCCCGGGTGACATCCCTGCCGTGGGCTTGGGGGCTCTGGGTGTGATTCCGCCGGTCCGGGTCCCGCAGCGACCACCTACCCAGCGCAGTCAGGGGCGGGGCTGGGACCCAGAGCGGGACCCCGGCTGCCGAGTCCAGGTGTCCCGCGGGCCTCGATTTGGGGAGCAGAAAACGCCAGGTCTTCAAGGGTGTCTGCCACCACCATGCCTGACCCATTTGGCAGCAGCCTCGTGTGTGGTGGTCTGGTGTGGACGGTGGAAGCGTGATTCTGCTGAGTGTCAGTGTGACCACTCGTGCTCAGCCGTATCTCAGCAGGAGGACAGGTGCCG…
54620	FBXL19	60	921.933333333333	996	NM_001282351	CGACTACTAGTCAGGTGTATGTCCCTCTTCCGCCATCTTGCTTGTAGTCCTCTTTCCTTTTCACCTTTCCATTGTTCCTGACGAGTAGAAATGGCAGCGGGAAGGCAGCAGATGGACTGCGACTCCCGTCAGCCGGGGGCCGGGGGCCGGAGCGCGCCGACGCCGAACCCGCTGCCGCCGCTGCCGGGCCTGTGTGCGAACTGAGTGCGGGGATTGCCACTTCTGCCGAGACATGAAGAAGTTCGGGGGGCCCGGGCGCATGAAGCAGTCGTGCCTGCTCCGGCAGTGCACTGCCCCCGTGCTCCCACACACAGCTGTGTGCCTCTTGTGTGGGGAGGCTGGGAAGGAGGACACGGTGGAGGGAGAGGAAGAGAAATTTGGTTTGAGCCTCATGGAGTG…
10295	BCKDK	181	243.447513812155	239	NM_005881	GCCTGGCGAGTGGACTGTTCGAGCCCTTCCGCTGGGACCCGGGCCCTGGCTCCGGCCCCGCGATGGGAGCTGCTCTCCGCGGGCTGAGCCTGTCAGCATCCTCGACGCACCCTGGTCCCTGAAGTCGGAGAAGAGCCCCTACCCACCCACACCCCCTTGCCCCATTTTGGGTCGCCTGGGTCCTCAGTCCTAGCGGATCCTCAGTCCTAGCGGCCACCGGGTCTGAAAGGAGCAAGACG
152579	SCFD2	215	96.306976744186	103	NM_152540	ACTGTGGAGACTGTCAAAGTCTCCCGGAGCCCAATTTCCGGAAGCGGTGAGTTCTGAAAGAAGTTCCTGCACCGTAGTTTCCCAAGTCTGCGAATCCCCAACC
162461	TMEM92	102	46.803921568627	47	NM_153229	AGCCCCGCCTTCTCTACACAGGAAAGCTCAGTGGCCCCCAAGCCAGG
55011	PIH1D1	1466	211.671214188267	226	NM_017916	ACGTAGGACGGAGGGTAGTGCGTCTAGAGACACATATTCCCCACGGATTTGACGATGGTGTTCGGTCTTGAATGGAAATGTAGTCTTAGGCCAGTCTTAGGTTTTTGAACAGGATAGTAGGTATCCGGAGTCGATTGAGGGCCAGAGCAGGCACTGGGGTTCGGATCCTGGGCAAAGTTTCCCACGTTGAGGGTCTCGAGGACGCCTAGATCTCTTTCCCAGGGCC
100526737	RBM14-RBM4	154	92.75974025974	91	NM_001198845	ATTCCTGAGGAGGACTGCCGGTCGTTCGGACGTCTTGCCTGTCGCTGGAGGAGAGGTCCGGGCTCTCCAGGAAGGTGGCTGCGGCGACAAA
9941	EXOG	218	13.674311926605	7	NM_001145464	GGGCAAG
8209	C21orf33	654	51.344036697248	77	NM_198155	GAGCAACGCGTTTGTAGAGGGGTGGGTGCGCACGCTCTGTCCCTGCGTGACCTTCCGACCCCGCTGTCCTCACCGCA
8614	STC2	47742	235.08958568975	221	NM_003714	ACTCGCGGCGCTGCTAACGGCCTGGTCACATGCTCTCCGGAGAGCTACGGGAGGGCGCTGGGTAACCTCTATCCGAGCCGCGGCCGCGAGGAGGAGGGAAAAGGCGAGCAAAAAGGAAGAGTGGGAGGAGGAGGGGAAGCGGCGAAGGAGGAAGAGGAGGAGGAGGAAGAGGGGAGCACAAAGGATCCAGGTCTCCCGACGGGAGGTTAATACCAAGAACC
27342	RABGEF1	1251	645.571542765787	677	NM_001287060	ATTTGCTCTTGGGCGTCAGGGCGGTACCCCACTCCGCTCGACCCTTTGGATCCACTCGCACTTCCTCCCGTCCAGAGTCAAAGGCCCCGGAAGTGACGTTTACGCGCCGCGCGTAACGTGCGTTCGCTGGCGGTGCCGGGGGCGGGGCGAGCAGGAGGGTGGGTGTGAGGCGGGAGCTGGCCGCGGAGCCCAGACCTACCCGGGCGAAGCGGGCGAGCGGTGGTTTGGACGCCGGCGGAGACGCGGGCGAGTGGTTAGCAGGAAGAAGATGAGCCTTAAGTCTGAACGCCGAGGAATTCATGTGGATCAATCGGATCTCCTGTGCAAGAAAGGATGTGGTTACTACGGCAACCCTGCCTGGCAGGGTTTCTGCTCCAAGTGCTGGAGGGAAGAGTACCA…
6738	TROVE2	1109	215.790802524797	219	NM_001173524	GGGGCGGAGGCGGGGCAAAAGAAGAGGGGCAGGACTCGTTCCCGGGAACCGAACCTGGAATCCCCGGCGGCAGTGGGGCTGTTGCTGTTGCTGTGGCTGTCGCTGCCCGTCAGGCTGCCTTCTTTTGTCGTTTCCCAGCGCTGCGCAGGACTTCTCCTGGCGGCGCTGCGGATCCAGGGGGTCGGCTGCCAGGTACAGGTTTCCTAAAGACAAAAAAAA
2288	FKBP4	2289	43.370467453036	58	NM_002014	GGCCCAGAGTGCGCTCGCGCCGGCACCAGCTCCCGGATAAACGGCGCGCCGCGCGGAG
26470	SEZ6L2	1509	243.121272365805	256	NM_001243332	GCGCCCCCTCCACCACAGAGCCGCGAGAAGAGGACAGAGGAGACTGAGCAAAGGGGGGTGGGCTCCAGGCGACCCCTAGCCCAATTCTGCCCCTCCATCCCAAGGGGCAGAGAAATTGTCTTTCTTTGCTGACTCCTACGAGGAAAAAAAAAAAAAAAAAAAAAACAATTAAAGGGAAAGATAAACGGAGACGGAGGAAAGGTGGCAGCCAGATTACTTAGAGAGGCACAGAGGAGAGAGATCGGGGTGAGTCGCC
10056	FARSB	1265	19.6395256916996	19	NM_005687	GCAGTGAGTTCGACACACC
4176	MCM7	11457	680.690058479532	676	NM_001278595	GCGGAGATTCTCAGCTTCCCCAGGAGCAAGACCTCTGAGCCCGCCAAGCGCGGCCGCACGGCCCTCGGCAGCGATGGCACTGAAGGACTACGCGCTAGAGAAGGAAAAGGTTAAGAAGTTCTTACAAGAGTTCTACCAGGATGATGAACTCGGGAAGAAGCAGTTCAAGTATGGGAACCAGTTGGTTCGGCTGGCTCATCGGGAACAGGTGGCTCTGTATGTGGACCTGGACGACGTAGCCGAGGATGACCCCGAGTTGGTGGACTCAATTTGTGAGAATGCCAGGCGCTACGCGAAGCTCTTTGCTGATGCCGTACAAGAGCTGCTGCCTCAGTACAAGGAGAGGGAAGTGGTAAATAAAGATGTCCTGGACGTTTACATTGAGCATCGGCTAATGAT…
4086	SMAD1	95	283.063157894737	460	NM_005900	GAGCGTGTGAGCGGGCGGGCGGGCAGGCGAGTGCGCCGGGTATTGGCAGCTGAGGAGTGGAGGCTGGGCAGCTCCGACTCCCTGACGCCAGCGCGACCAGATCAATCCAGGCTCCAGGAGAAAGCAGGCGGGCGGGCGGAGAAAGGAGAGGCCGAGCGGCTCAACCCGGGCCGAGGCTCGGGGAGCGGAGAGTGGCGCAGCGCCCGGCCGTCCGGACCCGGGCCGCGAGACCCCGCTCGCCCGGCCACTCGTGCTCCCACACGGACGGGCGCGCCGCCAACCCGGTGCTGACTGGGTTACTTTTTTAAACACTAGGAATGGTAATTTCTACTCTTCTGGACTTCAAACTAAGAAGTTAAAGAGACTTCTCTGTAAATAAACAAATCTCTTCTGCTGTCC…
580	BARD1	646	114.433436532508	114	NM_001282548	AGACGCGGGAAGAGCTTGGCCGGTTTCGAGTCGCTGGCCTGCAGCTTCCCTGTGGTTTCCCGAGGCTTCCTTGCTTCCCGCTCTGCGAGGAGCCTTTCATCCGAAGGCGGGACG
10432	RBM14	154	92.75974025974	91	NM_001198837	ATTCCTGAGGAGGACTGCCGGTCGTTCGGACGTCTTGCCTGTCGCTGGAGGAGAGGTCCGGGCTCTCCAGGAAGGTGGCTGCGGCGACAAA
1964	EIF1AX	491	183.704684317719	176	NM_001412	GGACGCAGGCGGATCTCTGAAGAGCTGGGTCGCCAGCCTCTCCCGCGCACGTTGCCTGGCCTCCAGCACCTACTTGGTCCCGCGCGCTCCCTCGTGTCGCCCCTCGGAGCAGCAGCCGCCGCGGTCGCCGCTACCCGGAAAGAAGTCAGAGACGCCGCGAGGTCGCCGCCACCGCC
5271	SERPINB8	711	134.344585091421	135	NM_198833	GCCGGAAGCCTTGCCCTCAATCAAGGCGGACGTGAAGCATCTACAAAGGAGGAATAGTCAAAGCAGCAGCGGCGGCGGCGGCGGCGGCAGCAGCAGCAGCAGCAGGAGGTGGGGGCCTCTGCCAGACCTTCTCTG
4659	PPP1R12A	641	100.15600624025	16	NM_002480	GGCGGCAGGAGAGGGG
22974	TPX2	3418	514.464306612054	498	NM_012112	GCGGCGGGTTGGCTCGCGCTTCGTTGTCAGATCTGAGGCGAGGCTAGGTGAGCCGTGGGAAGAAAAGAGGGAGCAGCTAGGGCGCGGGTCTCCCTCCTCCCGGAGTTTGGAACGGCTGAAGTTCACCTTCCAGCCCCTAGCGCCGTTCGCGCCGCTAGGCCTGGCTTCTGAGGCGGTTGCGGTGCTCGGTCGCCGCCTAGGCGGGGCAGGGTGCGAGCAGGGGCTTCGGGCCACGCTTCTCTTGGCGACAGGATTTTGCTGTGAAGTCCGTCCGGGAAACGGAGGAAAAAAAGAGTTGCGGGAGGCTGTCGGCTAATAACGGTTCTTGATACATATTTGCCAGACTTCAAGATTTCAGAAAAGGGGTGAAAGAGAAGATTGCAACTTTGAGTCAGACCT…
8682	PEA15	1357	104.986735445836	102	NM_003768	GGCGGCGGCGGCGGCGGGAGCCGAGGAGGAGGTTCCGGACGCTGCTTAGGAACCGGGGACTCAGGAGTGCCCGCGCCCTGAGCGCTCAGCTCCAGAGGCGTC
84885	ZDHHC12	7264	28.726872246696	35	NM_032799	GGCGCTTCTTCCGGGTGGGGCCCCGGGCCGAGGCG
51321	AMZ2	568;1029	175.827464788732;634.093294460641	178;660	NM_001289056;NM_001033574	GCGAAGGGACGCGGTGCGCATGCGCGTGAGGGCTGCCGCGGGTGGGTGGTATCGAGGCCTGTCGGGTCAGGGCGGTTCGCGGGTGCTGTCAGAGCTGGGCCGGGGCCCCTAGCCAGGCCCAGACATGTCCGTCCTTGTAAGTTAAAAGCTTCCATGGGAGCCTTCCTTCCTAATCAAG;GCGAAGGGACGCGGTGCGCATGCGCGTGAGGGCTGCCGCGGGTGGGTGGTATCGAGGCCTGTCGGGTCAGGGCGGTTCGCGGGTGCTGTCAGAGCTGGGCCGGGGCCCCTAGGCAGGGTAGCCGGGTCGTAGAGGCGGGGGCCGGTCGCGGTCGGTGGAGCGGGATGAGGATGTAGGAGGGGCGGACGTGGCGGAAGCCGCGGGGTCCGCGGGGTCGGTG…
55644	OSGEP	788	115.370558375635	102	NM_017807	CTCTGCGCTCCGGAAAGCTGCGGCCCAGCGCGGACTAGTGAGGACCTCCACAGCTCCTGACATTGCCAGGAGTCCTGTCGGCGTTTTCTCCCAGCCTCCGCC
5822	PWP2	373	70.1394101876676	69	NM_005049	GCGGACCCCCGGGAAGTGTCTCTGTGGGCGGCCGCCGGGTTGAGCTGCGGCACACGTGCGACGGCCGTG
57661	PHRF1	332	149.213855421687	83	NM_001286582	GACTCTCGGTCGTGCAGCGGCGGCGAGCGCTCGCGAGCGGCTGCGGGACGCGAGGTTTCCGGAGCTGAGCTCAATGTGCAGCA
9674	KIAA0040	358;358	532.86312849162;461.13687150838	557;483	NM_014656;NM_001162895	TCCCACGACCTTGGCCGGCGCCGGGGCCCTACACGCCAGACCTGGCTCGGGGTGGGAGTGCAGAGGCAACCAAAAAGGAACCCACACCTCCCTCCAGGGCCCGGGGCGCTGTCAGACGGGGCAGCAACCAGGAGATTCCCTGGGCCTGCAGGAAGCCCTTCCGCGGACCGAAAGATTGTTCCCCATTTTGGAGATGAAGAAACTGAGACTCAAAGCAGCTGAGTGACCTTCCCAAGGACACACACTGAACTGGGCGGTGATCAGGATCTGAATGCACAGGGCGGGTGTTCAGCGATTGTTTACTACGTTGAACGTGACCTCCAGGAAAGCAGTTCTGGCCGAGATCCCCTGACAACGCAAAGCAAGAAGTAACGTGGAAGGAGGCTCCCCAAGCTGGCT…
2863	GPR39	227	243.669603524229	208	NM_001508	GCCTCCTGGGCCTCTCCTAGGTTGGGCTGCTCCAGCAAGTTTCCATGAAAGCACCTGAAATACTAAGTTACCTTCGCGAGGAGAACTCGAGTGAGATAAAATCGTGCGCCCACGCAGGTGAGTTTGCAGCCAAGAATTTTGGACGCTGCTGGGAGGAGAAAGGGAAGTTGAGAAAGTCTTTGGACCTGGTAGCCTGGTGCTCTTTCTC
51645	PPIL1	440	221.520454545455	238	NM_016059	GGAGACCACCGCGAATGAAGTTTGCATTTTCCTCTGTTCTTGAGCCCAGCTTCTTCTCGTCTCCCACCCCAGCTTCCCGGCATTGGAAGAAGGGACCGTCCTCTTCCTTGTCTTGGCCACCCAAATCCTGGTATCGAAAGGGTTGAACGGACCGGAAGTGTGCAGCAGCGACGGGTCCCCAGCTAATCGACGCCGGAAGTAGCAATTACTAGACAAGCATTCCGCCGCCGGCTTCGCT
2264	FGFR4	164	165.512195121951	149	NM_002011	GCGCTCGGGCTGTCTGCGGACCCTGCCGCGTGCAGGGGTCGCGGCCGGCTGGAGCTGGGAGTGAGGCGGCGGAGGAGCCAGGTGAGGAGGAGCCAGGAAGGCAGTTGGTGGGAAGTCCAGCTTGGGTCCCTGAGAGCTGTGAGAAGGAG
112950	MED8	508	341.045275590551	358	NM_001001653	GACTGGAAAACCGGAAGTGAAATCGTGGCAGCCGCCTCGGCCGCCGCAATGCAGCCCTCCTTTCTATGTGTCATACTCGTTTATCTGGGTGACCAACCTGTTCCTATTGGTGCAGAGAGAGGAGAAGCAGCTTGAGGCATCATTAGATGCACTGCTGAGTCAAGTGGCTGATCTGAAGAACTCTCTGGGGAGTTTCATTTGCAAGTTGGAGAACGAGTATGGCCGGCTGACCTGCTTTGCCTTGCTTTCTGGACAGCTGAACACTCTGAACAAGGTCTTGAAGCATGAAAAAACACCGCTGTTCCGTAACCAGGTCATCATTCCTCTGGTGTTGTCTCCAGACCGAGATGAAGATCTC
2625	GATA3	104689	555.981382953319	585	NM_002051	ACAGCTGTCTGCGAACACTGAGCTGCCTGGCGCCGTCTTGATACTTTCAGAAAGAATGCATTCCCTGTAAAAAAAAAAAAAAAATACTGAGAGAGGGAGAGAGAGAGAGAAGAAGAGAGAGAGACGGAGGGAGAGCGAGACAGAGCGAGCAACGCAATCTGACCGAGCAGGTCGTACGCCGCCGCCTCCTCCTCCTCTCTGCTCTTCGCTACCCAGGTGACCCGAGGAGGGACTCCGCCTCCGAGCGGCTGAGGACCCCGGTGCAGAGGAGCCTGGCTCGCAGAATTGCAGAGTCGTCGCCCCTTTTTACAACCTGGTCCCGTTTTATTCTGCCGTACCCAGTTTTTGGATTTTTGTCTTCCCCTTCTTCTCTTTGCTAAACGACCCCTCCAAGATAAT…
1491	CTH	928	173.848060344828	183	NM_001190463	CCCGCTAATAAAATCCACCCCAACAATCGCTGTGTGCCGCTTTAGTGCGCTCGCCGTCGGCTCTACCTGCGTGCTTTAGCTCCTTCTCGCCTGATCCTTCTGTCTCTCCCAACCCCGGACACCCGGCTTCGACTGGTTATATCTTCGGTGTTCTTTTCCTCTCTTCTTCTTTCGCGGTTCAGC
79672	FN3KRP	3888	11.789609053498	6	NM_024619	GGGAAC
84172	POLR1B	3127;3085;3127	278.764630636393;95.218152350081;602.764630636393	262;77;586	NM_001282776;NM_001282774;NM_001282777	CACTACTTCCGGCGTGTACCGAGAGACTGGCGTCCGGCGTGTACCGAGAGACTGGCGTCCGGTGTGCAGGTGGCCACATGGATCCTGGCAGCCGGTGGCGGAACCTGCCCAGCGGGCCTAGCCTAAAGCACTTGACTGACCCCTCTTATGGAATCCCGCGGGAACAGCAAAAGGCAGCGTTGCAGGAGCTGACGCGGGCGCACGTGGAGTCCTTCAACTACGCTGTGCACGAGGGTCTCGGCCTCGCGGTGCAGGAGTTTCA;CACTACTTCCGGCGTGTACCGAGAGACTGGCGTCCGGCGTGTACCGAGAGACTGGCGTCCGGTGTGCAGGTGGCCAC;CACTACTTCCGGCGTGTACCGAGAGACTGGCGTCCGGCGTGTACCGAGAGACTGGCGT…
63929	XPNPEP3	800	98.815	95	NM_001204827	GCGGCTGGCCCGGTTTCCTGGCGACGCGGCCCTGCAGGCGGTTGCGTTCCCCGTCGTTACCCTCTTTCTCTTCCCGACGCGTGAGTTAGGCCGTA
7528	YY1	143	390.174825174825	404	NM_003403	AGAGTGTGGCGGCGGCGGCGAGATCTGGGCTCGGGTTGAGGAGTTGGTATTTGTGTGGAAGGAGGCGGAGGCGCAGGAGGAAGGGGGAAGCGGAGCGCCGGCCCGGAGGGCGGGAGGAGGCGCGGCCAGGGCGGGCGGTTGCGGCGAGGCGAGGCGAGGCGGGGAGCCGAGACGAGCAGCGGCCGAGCGAGCGCGGGCGCGGGCGCACCGAGGCGAGGGAGGCGGGGAAGCCCCGCCGCCGCCGCGGCGCCCGCCCCTTCCCCCGCCGCCCGCCCCCTCTCCCCCCGCCCGCTCGCCGCCTTCCTCCCTCTGCCTTCCTTCCCCACGGCCGGCCGCCTCCTCGCCCGCCCGCCCGCAGCCGAGGAGCCGAGGCCGCCGCGGCCGTGGCGGCGGAGCCCT…
10262	SF3B4	10566	38.576377058489	50	NM_005850	GAGGTCAGAAGGCGGAACCGCTGCTGGGAGACGGCGGGATCTCTTTCGCC
79807	GSTCD	87	225.64367816092	215	NM_024751	GGCCGGCGCGAGTATTTTCCACATAAGGTGGCTGTCGTTTTTCTCCTGGCGTCTGTGGAGGCGAGTGGTCTGCGGGCAGCAGCTCCCAGAGGCAGCCTTGGAATTCCAGCTCGGACTGGGCGGGAAGGCGCAGGCGGCCCAGGTCGCCGACACGCTCACGCACCCTCCCTGCCTGGCCGCGCCTCTGCGACCAGGTGACCCAATGAAAGAAGAAA
57459	GATAD2B	239	118.786610878661	117	NM_020699	GTCCCTAGTCCCGTCAGCAGGGTCTGGATCCCCTGTGCCGTCGCCTCTTCCTTTTTCGACGCCTCCGCCGCCGCCTGAGGAGGCGAGCTAGCCGGGAGTTACACCGCCACCGCCAGG
26088	GGA1	602	179.001661129568	16	NM_001172688	GGTGCTGGAAACATGC
7324	UBE2E1	565	170.187610619469	193	NM_003341	GCGAGCGTGTGTGGCTGGGGGAAGCCATTGCCTGTTTAATAGTTGCTGTTGCTGCACTTCCGCTTCTCTCCCAGCGAGAGAGAGACACGAGTGGCCAGGCCCAGCCGCAGCCGCAGCAGCAGCCGCCGCGGCGGCACGGAGGAGCCAGACACAAAGAGAGGGGCTGTTTGCGGGGTGGGGTGGGGGGTTCGCT
8837	CFLAR	407	212.371007371007	195	NM_001202517	GACAGCTGAGACAACAAGGACCACGGGAGGAGGTGTAGGAGAGAAGCGCCGCGAACAGCGATCGCCCAGCACCAAGTCCGCTTCCAGGCTTTCGGTTTCTTTGCCTCCATCTTGGGTGCGCCTTCCCGGCGTCTAGGGGAGCGAAGGCTGAGGTGGCAGCGGCAGGAGAGTCCGGCCGCGACAGGACGAGTGCTG
440	ASNS	1283	171.73343725643	174	NM_001673	CCCGCACGCGTTACAGGAGCCAGGTCGGTATAAGCGCCAGCGGCCTCGCCGCCCGTCAAGCTGTCCACATCCCTGGCCTCAGCCCGCCACATCACCCTGACCTGCTTACGCCCAGATTTTCTTCAATCACATCTGAATAAATCACTTGAAGAAAGCTTATAGCTTCATTGCACC
93487	MAPK1IP1L	21261	134.970321245473	149	NM_144578	GGCGCCAGGAGGAGCCGCGCGCTGCTGGTGCTGTTGCCGCCGCTGCTCTAGCTGCCGTCAGTCAGGCTGCGCCCGCGTCTTCAGGGCCCAGTCCCTCGGACCCATCGCCGCTTCTAGACCCTACTGCGGTCTCGGATATTGCCGGGAAA
84908	FAM136A	4393	20.062827225131	19	NM_032822	GGGGCAGCGCGGGGTCGCC
22826	DNAJC8	3379	22.6383545427641	6	NM_014280	GGGGAA
87	ACTN1	445	63.937078651685	64	NM_001130005	CAGCAGCCGTTGCTCAGAGAGAAGGTGGAGGAAGAAATCCAGACCCTAGCACGCGCGCACCATC
23528	ZNF281	316	104.525316455696	107	NM_012482	GCAGTACACGGGAGGCTTTTAATTCCATTGTGGAGAGGACGGCGTTATTTTTATTAACTGGAGGCGACGGCGGCTGCGGCGGCGGCGGGACCCGCCTCCTCCGGGGT
81890	QTRT1	550	18.8181818181818	10	NM_031209	GACAGTCAAG
54704	PDP1	405;405;405	146.637037037037;285.637037037037;186.637037037037	155;294;195	NM_001161780;NM_001161779;NM_018444	CCCGCACGGTAGGGGAGCAGAGTGGGCAGGCCGGGGGTGAGGGCTCGCGCTCCGGGAGCTGCACGGGGCTGCGTGGAAAGAGCGCCGAGCGGTGGCGTCGTTGTCGCCCCCTCCTCGTCGGGAAGAATCGTTTGGTCTCCTGCCGTGCCCGGAGA;CCCGCACGGTAGGGGAGCAGAGTGGGCAGGCCGGGGGTGAGGGCTCGCGCTCCGGGAGCTGCACGGGGCTGCGTGGAAAGAGCGCCGAGCGGTGGCGTCGTTGTCGCCCCCTCCTCGTCGGGAAGAATCGTTTGGTCTCCTGCCGTGCCCGGTTCGTATTCCCTACTCCCTGCCACGAGCCGCCCCGTCCGGGATCCTCCACCCGTCCAAAGTTGTGAGGGGGCGCCGGGCGTGCTCGCGGAT…
4173	MCM4	214	415.682242990654	890	NM_005914	CAGTAAGCGCGCCTCTTTGGCCCGAATCAACATGGAAACCTAAGGAAAAACGTCTGACCTGCGGAGGTAGTTTGGGTGGCTACTTGGTGTTGGACTTGGCTAAATAAATACCAGAGGCAGATAAAACAAGCGAGGGGCCTAGGTCAAGAGTTCCAAGTTTGTTCCTCGATAAAAAACGACAAACGCGGTCGGGGGCGGTGATGCCCGCCTGCAGTCCCAACACTTTAGGAAGCTGAGGCGGGGGGATCGCAGGAGTTCGAGACCAGTCTGGGCAACATAATGAGACCATCCCCACCACCTCCCGTCCTTAATTTTTTTTAATAAAAAAAATCTTTAAGTGAGAAATGCATCTGTAATGTCCTTATTAACCAAAAACGCCTAAGGGATAAAGAAGCACAC…
51473	DCDC2	265	255.052830188679	309	NM_016356	AGAAGCTGTCCACCTTGATTCTGCCCGTAGCAGGTGAACCTGGTGTGGTGCGCGCACTGCGGGTCCTGATTGGCTGTGCACGCCACGGTGAAAAACTTGAGCGTCTACTCCGAGTCCTGCAAGCTCCTAGTGTCTCCTCTGGGTGGACGCCTAGGCGCACGGCCGTTACTTCTCTTTCACCTGTGGATTCGTCAGTTTCTCGTTCGTTTCAGGAGGCGATCCCGCGCCCTGGGTGCGGTGAGGCCGCTGGGACAGCGGAGGTGCCTCCCGACGCGAAGCAGCGAGCTGAGGCGGCGGCCAGCGGGGAAG
55829	VIMP	1912	24.070083682008	13	NM_203472	GGCGGCGGCGGTC
10412	NSA2	1891	186.014806980434	113	NM_014886	GACTCTTTCCTGTCCCGGCCTGCGTGGTGTGGGCTTGTGGGTCTTTGAGACCCGAAAATTGAGAGCGTTTTCGCACTCCAGCGGCTGCTCCTGGCGGCTCTGCGGCCGTCACC
10802	SEC24A	1082	275.893715341959	276	NM_021982	TCCCTCCTTCTCTCTAGGTTTGGCTGCCGCCTTCTAGCCGGGCGTTCGCGGCCCCGCCGGCCCGACTCTCAAGCCTCAGCTCCCAGGCTAGGCTGTGGCCGCCGGTGGCCTGGGGAGAGTGCGGCGCCATGCCTCGGGCTTAATGCGCCCCCCCCTCTTCTCCCAGTCTTCAGTCTTAAGTCGTTAGCCTCCTCCCTCCGCTTTCAGCAGTGGTCTTTCAGCTCTCTTCTTGTGCGCTGTTGTCGACCCCGACCAGCCCCTTCCAACCCAGTCATC
145282	MIPOL1	62;62	596.370967741935;584.41935483871	602;588	NM_001195296;NM_001195297	GGATCGTCTGTGGGTGAGTCTCGAGCCAGGAGGCTCTGAGCCAGTGGCGATTGGCTGACGCGGTGGCTGCGCACTCGGCCTGAGAAACTCGGCAAGCGCGCAGTGTCGACTCCCCGGTCTATGCCAGGCGCATCTCAGATACCAGCATTGCCACCGGTGGGTAGAACACTAAGTGGGCTCTTGGAGTCCCTGATTCCAGAACTTGACTCTTGGATGACATTTCTGGACCTGCTCTGGGCCAGAGAGGAGACCACTTCCCTTAAGGGAACGAGGTCTCACTATATTGCCCAGACTGGTCTCGAACTCCTGGGCTCAAACAGTCCCCCTGCGTTGGCCTCCCAAAGTGATGGAATTACAGGTGTGAATCACTGCATCTGACTATGGCAAGGATCTCTGTCA…
1983	EIF5	181	347.325966850829	372	NM_001969	GGGACAGCCCCTCCCCGCTGCTCGGCGGCGGCACCTGGCCCGGCCGCTCCTCGCTGCGCTTCGCCTCCGCCTCCTCGGACTCGGACTCGGGTTTATATCGCGCCTCACTTCATCCCAGTCCCGGGCGAGCAGCGTTGGGTTTATGTCTTTATTTGACGAAAACGAGCTGTTGCGCAGCCATTGGTACCTGTATTGGGGAAACATAGCATACAAGCAAGAAGCTTACAGCCTCAGTGGCGAAAATTTTTTCATGTCAGAGACCGAGAACTCTTGCAGTCGTTTATGTCATCCCTTCTTCTCCAGACAGAAGATACCAAAAAGTTGCAATCAAAGATCTCTTCATCTTATTGATAAAGCCACTAATAAGCCAAA
4898	NRD1	3277	114.02776930119	122	NM_001101662	GGAGGGGTTCAGGCCTGTTCCCCGCGGCTGCGGCAGCACCAGGGCCGGCCGCCACCGCCTCTAGAACGCGGAGGAGGTGGGTCCTGGGAAGCGGGATGTCCATCGCTCCAGCTTGGTGGTGA
11120	BTN2A1	377	187.302387267905	135	NM_001197234	GTCTAGTAGTGCCTGTGCCCCTGGGCAGATTGGAGAGAAGAGGGACGACTGGAGAATCGTCGAGAACCAGCGGAGAAAAGAAAAAGCAACGTTTAATTCTAGAAGGCCTCCTGTCCCTGCCTGCTCTGGGTGCTC
23517	SKIV2L2	3365	190.552154531947	226	NM_015360	GCCGCCCTCGCTCTTTATCCACTGAGCAGCTTATCCACTTTAGGTCGGAAAGGAAAGGAAAGAAAAGCAGGAAAAAAAAAAAAAGTCAGGGGAACATTTTTGTCGGCTGCGCGACTCGACTACTTTTGTCTCCTGCGGGCCACTGTTGAGCCTTCACGAGACGTCACTGTCTTCGGTCGCGGGGCATCGTGGGTAGGAGGGAGATTTGCTCTCACTGCTCCCAAAA
8416	ANXA9	3490	400.083954154728	414	NM_003568	GCTGAGAGGCTGAGTGGAGTTCACTCACATGGATTGAGGCCCAGTTCCTGGGAGAAGAGATGCTGGGCAGGAAGGTGTCTGCATGTGGGACTCTGTACAGCCCGGTCCTCTCCCACGTCTGGGAGGGGCCAGAGTCAGACAACTGCTGGGTTCGTCCCTAAGAGAGGTCATCTGACTGGCTGTTCAGCCTAGGCTGCACACACCCCCACTTTCCTCTACCAGGCCACACCGGAGGCAGTGCTCACACAGGCAAGCTACCAGGCCACAACAACGACACCCACCTCACCTCTGGCACCTCTGAGCATCCACGTACTTGCAAGAACTCTTGCTCACATCAGCTAAGAGATTGCACCTGCTGACCTAGAGATTCCGGCCTGTGCTCCTGTGCTGCTGAGCAGG…
203068	TUBB	150;64444	174.78;152.693578921234	84;155	NM_001293216;NM_001293214	GACCGCATCTCTGTGTACTACAATGAAGCCACAGGTGGCAAATATGTTCCTCGTGCCATCCTGGTGGATCTAGAACCTGGGACC;CTCTCAGAACCTTCCTGCCGTCGCGTTTGCACCTCGCTGCTCCAGCCTCTGGGGCGCATTCCAACCTTCCAGCCTGCGACCTGCGGAGAAAAAAAATTACTTATTTTCTTGCCCCATACATACCTTGAGGCGAGCAAAAAAATTAAATTTTAACC
114984	FLYWCH2	567	291.636684303351	278	NM_138439	GAGGCTGGGGCCCTTGGCGCGGAGGCTGAGGGACCCGCCGCGGCGCTGTCGCCGGAGAGGGAGGGCACCGCTGTCGTCGGCCAGAAGCCAAGGAGTCCTCAGTGACGGTGGGATCCACAACATCTCCACATCGCTGTCCCCACCCAGCCAGGGCAGCGCCAGCACTAGCTCAGACGCAAGGACGGAACCGCTGGACTCCAGGTTCCTTGCCTGGGAGTAGGAGAAATCCACCTGCTGGGGGCTGAGTGTGGCCTGAGGGACAGGCCCTGGGTCCCGGG
50999	TMED5	2520	170.040476190476	171	NM_016040	GGAGAACTGCGCTTCTCTTTCGGAGGGAGTGTTCGCCGCCGCCGCGGCCGCCACCTGGAGTTTCTTCAGACTCCAGATTTCCCTGTCAACCACGAGGAGTCCAGAGAGGAAACGCGGAGCGGAGACAACAGTACCTGACGCCTCTTTCAGCCCGGGATCGCCCCAGCAGGG
619189	SERINC4	167	175.425149700599	176	NM_001258032	CTCTGGGGCTGTGTACCGAGTATGTGCAGGAACCGCCACCTTCCACCTGCTGCAGGCTGTGTTGCTGGTCCACCTCCACTCCCCCACCAGCCCGCGGGCACAGCTGCATAATAGCTTCTGGCTCCTCAAGCTGCTGTTCCTGTTAGGTCTCTGTGCTATTGCCTTCTGCATTCCTG
5687	PSMA6	11912	66.523589657488	62	NM_002791	GTGTGCCTGGTGCGGGAGCTACGGGGCCCAGGGATTGTGTTTAAAGTAGTGCTTCTACCAAC
4296	MAP3K11	544	474.325367647059	462	NM_002419	GGAGCCGTCGGGGCCAAAGGAGACGGGGCCAGGAACAGGCAGTCTCGGCCCAACTGCGGACGCTCCCTCCACCCCCTGCGCAAAAAGACCCAACCGGAGTTGAGGCGCTGCCCCTGAAGGCCCCACCTTACACTTGGCGGGGGCCGGAGCCAGGCTCCCAGGACTGCTCCAGAACCGAGGGAAGCTCGGGTCCCTCCAAGCTAGCCATGGTGAGGCGCCGGAGGCCCCGGGGCCCCACCCCCCCGGCCTGACCACACTGCCCTGGGTGCCCTCCTCCAGAAGCCCGAGATGCGGGGGGCCGGGAGACAACACTCCTGGCTCCCCAGAGAGGCGTGGGTCTGGGGCTGAGGGCCAGGGCCCGGATGCCCAGGTTCCGGGACTAGGGCCTTGGCAGCCAGC…
4716	NDUFB10	11328	45.86396539548	49	NM_004548	AGAGGCCAGGGCAGCGCGTCCGGGAGCGGAGTCCGCGCCCGCCGCCGCC
[truncated: 4,928 more rows]
